# Supplementary material for: Comprehensive profile and contrastive analysis of circular RNA expression in cervical squamous carcinoma and adenocarcinoma
Source: PeerJ journal article supplement (doi:10.7717/peerj.14759), 2023-01-26
Supplement: Supp_tables_and_figs_77018.zip [file Supp_tables_and_figs_77018.zip]

## Sheet: Sheet1
CircRNA_ID	Chr	start	end	strand	full_length	spliced_length	gene_id	feature	source_gene_name	Gene_description
hsa_circ_0088267	9	116725770	116733523	-	7753	410	ENSG00000148219;	exon:116725771-116725950,exon:116728992-116729096,exon:116733399-116733523	ASTN2	Fibronectin type III superfamily||Astrotactin-2, C-terminal beta-hairpin domain||Membrane attack complex component/perforin (MACPF) domain||Astrotactin||Fibronectin type III||Annexin-like domain
hsa_circ_0088266	9	116651527	116651793	-	266	266	ENSG00000148219;	exon:116651528-116651793	ASTN2	Fibronectin type III superfamily||Astrotactin-2, C-terminal beta-hairpin domain||Membrane attack complex component/perforin (MACPF) domain||Astrotactin||Fibronectin type III||Annexin-like domain
hsa_circ_0088265	9	116618323	116620443	-	2120	283	ENSG00000148219;	exon:116618324-116618472,exon:116620310-116620443	ASTN2	Fibronectin type III superfamily||Astrotactin-2, C-terminal beta-hairpin domain||Membrane attack complex component/perforin (MACPF) domain||Astrotactin||Fibronectin type III||Annexin-like domain
novel_circ_0038407	9	128117709	128118118	-	409	195	ENSG00000234771;	exon:128117923-128118118	--	-
hsa_circ_0088268	9	116725770	116820783	-	95013	766	ENSG00000148219;	exon:116725771-116725950,exon:116728992-116729096,exon:116820617-116820783	ASTN2	Fibronectin type III superfamily||Astrotactin-2, C-terminal beta-hairpin domain||Membrane attack complex component/perforin (MACPF) domain||Astrotactin||Fibronectin type III||Annexin-like domain
novel_circ_0011744	17	11990461	11992911	-	2450	88	ENSG00000154957;	exon:11990462-11990550	ZNF18	SCAN domain superfamily||Zinc finger protein 18||KRAB domain superfamily||Zinc finger C2H2 superfamily||Zinc finger C2H2-type||SCAN domain||Krueppel-associated box
hsa_circ_0067127	3	126124363	126137960	-	13597	812	ENSG00000144908;	exon:126130223-126130293	ALDH1L1	Aldehyde dehydrogenase, glutamic acid active site||Aldehyde/histidinol dehydrogenase||Aldehyde dehydrogenase, C-terminal||Formyl transferase, C-terminal||Phosphopantetheine binding ACP domain||Aldehyde dehydrogenase domain||Formyl transferase, N-terminal domain superfamily||Formyl transferase-like, C-terminal domain superfamily||Aldehyde dehydrogenase, cysteine active site||Phosphoribosylglycinam…
hsa_circ_0048286	19	1816224	1816569	-	345	260	ENSG00000079313;	exon:1816225-1816569	REXO1	-||Ribonuclease H-like superfamily||RNA exonuclease 1-like, exonuclease domain||Ribonuclease H superfamily||Elongin A binding-protein 1||Exonuclease, RNase T/DNA polymerase III
hsa_circ_0020190	10	119838534	119842595	-	4061	408	ENSG00000197771;	exon:119838535-119838700,exon:119840843-119840960,exon:119842472-119842595	MCMBP	Mini-chromosome maintenance complex-binding protein
hsa_circ_0020197	10	119902798	119904277	+	1479	405	ENSG00000107651;	exon:119902799-119903009,exon:119904084-119904277	SEC23IP	Sterile alpha motif/pointed domain superfamily||Sterile alpha motif domain||WWE domain||SEC23-interacting protein, SAM domain||-||DDHD domain
novel_circ_0026883	3	197832196	197839397	+	7201	344	ENSG00000186001;	exon:197832197-197832317,exon:197835674-197835822,exon:197839321-197839397	LRCH3	Calponin homology domain||CH domain superfamily||Leucine-rich repeat||Leucine-rich repeat domain superfamily||-||Leucine-rich repeat, typical subtype
novel_circ_0037607	8	71299046	71317689	-	18643	405	ENSG00000104313;	exon:71299047-71299233,exon:71299638-71299720,exon:71317552-71317689	EYA1	Eyes absent family||EYA domain superfamily||Eyes absent homologue 1||-||EYA domain
novel_circ_0030650	5	140506834	140513479	+	6645	116	ENSG00000131503;ENSG00000254996;	exon:140513363-140513479	ANKHD1;ANKHD1-EIF4EBP3	-
hsa_circ_0087961	9	110972072	111011690	-	39618	38358	ENSG00000198121;	intron:110972073-110972220,intron:110973481-110973558,intron:111009148-111009201,intron:111011548-111011690	LPAR1	G protein-coupled receptor, rhodopsin-like||Lysophosphatidic acid receptor||GPCR, rhodopsin-like, 7TM||Lysophosphatidic acid receptor EDG-2
hsa_circ_0087960	9	110972072	110973558	-	1486	226	ENSG00000198121;	exon:110972073-110972220,exon:110973481-110973558	LPAR1	G protein-coupled receptor, rhodopsin-like||Lysophosphatidic acid receptor||GPCR, rhodopsin-like, 7TM||Lysophosphatidic acid receptor EDG-2
hsa_circ_0022847	11	65605760	65608448	-	2688	1092	ENSG00000173327;	exon:65605761-65605852,exon:65608268-65608448	MAP3K11	Mitogen-activated protein (MAP) kinase kinase kinase, MLK1-4||Protein kinase-like domain superfamily||Protein kinase domain||Tyrosine-protein kinase, catalytic domain||SH3-like domain superfamily||-||Serine/threonine-protein kinase, active site||Serine-threonine/tyrosine-protein kinase, catalytic domain||Protein kinase, ATP binding site||SH3 domain||MLK1-3, SH3 domain
hsa_circ_0012474	1	51814034	51814813	-	779	235	ENSG00000078618;	exon:51814035-51814089,exon:51814551-51814609,exon:51814693-51814813	NRDC	Peptidase M16, N-terminal||Peptidase M16, zinc-binding site||Peptidase M16, C-terminal||Metalloenzyme, LuxS/M16 peptidase-like||Peptidase M16, middle/third domain
hsa_circ_0037010	15	94384021	94402019	+	17998	503	ENSG00000140563;	exon:94384022-94384124,exon:94385423-94385525,exon:94398961-94399062,exon:94399921-94399995,exon:94401900-94402019	MCTP2	C2 domain superfamily||-||C2 domain||Phosphoribosyltransferase C-terminal
hsa_circ_0037016	15	96285325	96290783	-	5458	5458	ENSG00000247809;	exon:96288664-96288755,exon:96290630-96290783	--	-
hsa_circ_0037014	15	96271702	96290783	-	19081	19081	ENSG00000247809;	exon:96271703-96271798,exon:96290630-96290783	--	-
hsa_circ_0063331	22	38498084	38501280	-	3196	451	ENSG00000100201;	exon:38498085-38498150,exon:38498440-38498573,exon:38499400-38499499,exon:38501130-38501280	DDX17	RNA helicase, DEAD-box type, Q motif||P-loop containing nucleoside triphosphate hydrolase||Helicase, C-terminal||Helicase superfamily 1/2, ATP-binding domain||ATP-dependent RNA helicase DEAD-box, conserved site||DEAD/DEAH box helicase domain||-
novel_circ_0032936	6	152239532	152244656	-	5124	292	ENSG00000131018;	exon:152239533-152239706,exon:152244537-152244656	SYNE1	KASH domain||Actinin-type actin-binding domain, conserved site||Spectrin repeat||-||CH domain superfamily||Nesprin-1||Calponin homology domain||Spectrin/alpha-actinin
novel_circ_0032937	6	152239532	152249262	-	9730	274	ENSG00000131018;	exon:152239533-152239706,exon:152249161-152249262	SYNE1	KASH domain||Actinin-type actin-binding domain, conserved site||Spectrin repeat||-||CH domain superfamily||Nesprin-1||Calponin homology domain||Spectrin/alpha-actinin
novel_circ_0032934	6	152236106	152239706	-	3600	196	ENSG00000131018;	exon:152236107-152236303	SYNE1	KASH domain||Actinin-type actin-binding domain, conserved site||Spectrin repeat||-||CH domain superfamily||Nesprin-1||Calponin homology domain||Spectrin/alpha-actinin
hsa_circ_0082309	7	129671428	129690546	+	19118	383	ENSG00000106459;	exon:129671429-129671543,exon:129677632-129677758,exon:129690406-129690546	NRF1	NRF1/Ewg family||Nuclear respiratory factor-1, activation binding domain||Nuclear respiratory factor 1, NLS/DNA-binding, dimerisation domain
hsa_circ_0057173	2	177440964	177462018	+	21054	359	ENSG00000018510;	exon:177440965-177441036,exon:177442407-177442486,exon:177445546-177445626,exon:177461893-177462018	AGPS	FAD-binding, type PCMH, subdomain 2||FAD-binding domain, PCMH-type||FAD-binding, type PCMH, subdomain 1||FAD-binding, type PCMH-like superfamily||FAD linked oxidase, N-terminal||Alkyldihydroxyacetonephosphate synthase||Vanillyl-alcohol oxidase, C-terminal subdomain 2||FAD-linked oxidase-like, C-terminal||FAD-linked oxidase, C-terminal
novel_circ_0032933	6	152233780	152244656	-	10876	182	ENSG00000131018;	exon:152233781-152233963	SYNE1	KASH domain||Actinin-type actin-binding domain, conserved site||Spectrin repeat||-||CH domain superfamily||Nesprin-1||Calponin homology domain||Spectrin/alpha-actinin
novel_circ_0032930	6	152176393	152180294	-	3901	324	ENSG00000131018;	exon:152176394-152176560,exon:152180136-152180294	SYNE1	KASH domain||Actinin-type actin-binding domain, conserved site||Spectrin repeat||-||CH domain superfamily||Nesprin-1||Calponin homology domain||Spectrin/alpha-actinin
novel_circ_0032931	6	152224493	152225876	-	1383	325	ENSG00000131018;	exon:152224494-152224664,exon:152225721-152225876	SYNE1	KASH domain||Actinin-type actin-binding domain, conserved site||Spectrin repeat||-||CH domain superfamily||Nesprin-1||Calponin homology domain||Spectrin/alpha-actinin
hsa_circ_0082306	7	129657342	129690546	+	33204	615	ENSG00000106459;	exon:129677632-129677758,exon:129690406-129690546	NRF1	NRF1/Ewg family||Nuclear respiratory factor-1, activation binding domain||Nuclear respiratory factor 1, NLS/DNA-binding, dimerisation domain
hsa_circ_0082307	7	129657342	129727365	+	70023	1357	ENSG00000106459;	exon:129717219-129717376,exon:129727241-129727365	NRF1	NRF1/Ewg family||Nuclear respiratory factor-1, activation binding domain||Nuclear respiratory factor 1, NLS/DNA-binding, dimerisation domain
hsa_circ_0057179	2	177482058	177499730	+	17672	370	ENSG00000018510;	exon:177499618-177499730	AGPS	FAD-binding, type PCMH, subdomain 2||FAD-binding domain, PCMH-type||FAD-binding, type PCMH, subdomain 1||FAD-binding, type PCMH-like superfamily||FAD linked oxidase, N-terminal||Alkyldihydroxyacetonephosphate synthase||Vanillyl-alcohol oxidase, C-terminal subdomain 2||FAD-linked oxidase-like, C-terminal||FAD-linked oxidase, C-terminal
hsa_circ_0047378	18	32111753	32124845	+	13092	451	ENSG00000134758;	exon:32111754-32111919,exon:32124734-32124845	RNF138	Zinc finger, RING-type||Drought induced 19 protein type, zinc-binding domain||RING-type zinc-finger, LisH dimerisation motif||Zinc finger C2HC RNF-type||Zinc finger, MIZ-type||Zinc finger, RING/FYVE/PHD-type
hsa_circ_0047370	18	31890734	31917667	-	26933	1376	ENSG00000153339;	exon:31890735-31890866,exon:31917578-31917667	TRAPPC8	Tetratricopeptide-like helical domain superfamily||TRAPP III complex, Trs85||-
hsa_circ_0047373	18	31897785	31909760	-	11975	825	ENSG00000153339;	exon:31897786-31897891,exon:31909667-31909760	TRAPPC8	Tetratricopeptide-like helical domain superfamily||TRAPP III complex, Trs85||-
hsa_circ_0047374	18	31897785	31917667	-	19882	1244	ENSG00000153339;	exon:31897786-31897891,exon:31917578-31917667	TRAPPC8	Tetratricopeptide-like helical domain superfamily||TRAPP III complex, Trs85||-
hsa_circ_0064643	3	29868857	29897475	+	28618	290	ENSG00000144642;	exon:29868858-29868964,exon:29884162-29884208,exon:29897379-29897475	RBMS3	RNA-binding domain superfamily||Nucleotide-binding alpha-beta plait domain superfamily||RNA recognition motif domain||Paraneoplastic encephalomyelitis antigen||RBMS3, RNA recognition motif 2||-
hsa_circ_0064645	3	29868857	29936196	+	67339	452	ENSG00000144642;	exon:29868858-29868964,exon:29880779-29880817,exon:29899705-29899755,exon:29936086-29936196	RBMS3	RNA-binding domain superfamily||Nucleotide-binding alpha-beta plait domain superfamily||RNA recognition motif domain||Paraneoplastic encephalomyelitis antigen||RBMS3, RNA recognition motif 2||-
hsa_circ_0058814	2	236036560	236049281	+	12721	469	ENSG00000157985;	exon:236040751-236040841,exon:236049059-236049281	AGAP1	Small GTPase||ArfGAP domain superfamily||Ankyrin repeat||P-loop containing nucleoside triphosphate hydrolase||Arf GTPase activating protein||PH-like domain superfamily||ARFGAP/RecO-like zinc finger||-||Pleckstrin homology domain||Ankyrin repeat-containing domain||Ankyrin repeat-containing domain superfamily
hsa_circ_0036768	15	90219792	90221765	+	1973	477	ENSG00000185033;	exon:90219793-90219891,exon:90220982-90221093,exon:90221367-90221480,exon:90221614-90221765	SEMA4B	-||Sema domain superfamily||WD40/YVTN repeat-like-containing domain superfamily||Sema domain||Semaphorin||Plexin repeat||PSI domain
hsa_circ_0036763	15	90217438	90219891	+	2453	326	ENSG00000185033;	exon:90217439-90217602,exon:90217767-90217829,exon:90219793-90219891	SEMA4B	-||Sema domain superfamily||WD40/YVTN repeat-like-containing domain superfamily||Sema domain||Semaphorin||Plexin repeat||PSI domain
hsa_circ_0015124	1	168002481	168004793	+	2312	475	ENSG00000143164;	exon:168002482-168002575,exon:168003870-168003989,exon:168004533-168004793	DCAF6	-||WD40/YVTN repeat-like-containing domain superfamily||IQ motif, EF-hand binding site||WD40-repeat-containing domain superfamily||WD40-repeat-containing domain||WD40 repeat
hsa_circ_0015122	1	167987494	168004793	+	17299	940	ENSG00000143164;	exon:167987495-167987608	DCAF6	-||WD40/YVTN repeat-like-containing domain superfamily||IQ motif, EF-hand binding site||WD40-repeat-containing domain superfamily||WD40-repeat-containing domain||WD40 repeat
hsa_circ_0006869	1	1804418	1825499	-	21081	476	ENSG00000078369;	exon:1817837-1817875,exon:1825397-1825499	GNB1	G-protein beta WD-40 repeat||WD40/YVTN repeat-like-containing domain superfamily||WD40-repeat-containing domain superfamily||WD40 repeat, conserved site||G-protein, beta subunit||WD40 repeat||WD40-repeat-containing domain||Guanine nucleotide-binding protein, beta subunit
hsa_circ_0006868	11	107390073	107418287	-	28214	439	ENSG00000152404;	exon:107390074-107390211,exon:107392779-107392895,exon:107416209-107416298,exon:107418194-107418287	CWF19L2	Cwf19-like, C-terminal domain-1||-||Cwf19-like protein||HIT-like superfamily||Cwf19-like protein, C-terminal domain-2
novel_circ_0019118	1	85270617	85270906	-	289	288	ENSG00000142867;	exon:85270618-85270906	BCL10	-||CARD domain||Death-like domain superfamily||B-cell lymphoma/leukemia 10/E10
hsa_circ_0006863	8	30175084	30180630	+	5546	386	ENSG00000104671;	exon:30175085-30175190,exon:30177126-30177214,exon:30179408-30179455,exon:30180488-30180630	DCTN6	-||Dynactin subunit 6||Trimeric LpxA-like superfamily||Hexapeptide repeat
hsa_circ_0006862	1	212042992	212047417	+	4425	408	ENSG00000143476;	exon:212042993-212043118,exon:212044660-212044758,exon:212047151-212047212,exon:212047297-212047417	DTL	WD40 repeat||WD40-repeat-containing domain superfamily||WD40-repeat-containing domain||WD40/YVTN repeat-like-containing domain superfamily||WD40 repeat, conserved site
hsa_circ_0006861	6	63646526	63680161	+	33631	431	ENSG00000118482;	exon:63680000-63680161	PHF3	Zinc finger, FYVE/PHD-type||-||Transcription elongation factor S-II, central domain||Spen paralogue and orthologue SPOC, C-terminal||Zinc finger, PHD-type, conserved site||Zinc finger, PHD-type||Transcription elongation factor S-II, central domain superfamily||Zinc finger, RING/FYVE/PHD-type||Zinc finger, PHD-finger
hsa_circ_0006860	17	36525227	36528202	-	2975	402	ENSG00000278259;	exon:36525228-36525341	MYO19	Kinesin motor domain superfamily||-||P-loop containing nucleoside triphosphate hydrolase||Class XIX myosin, motor domain||IQ motif, EF-hand binding site||Myosin head, motor domain
hsa_circ_0006867	4	150467672	150491035	-	23363	450	ENSG00000198589;	exon:150467673-150467785,exon:150471624-150471739,exon:150487732-150487834,exon:150490918-150491035	LRBA	PH-BEACH domain||BEACH domain||BEACH domain superfamily||WD40-repeat-containing domain superfamily||Armadillo-like helical||Concanavalin A-like lectin/glucanase domain superfamily||WD40/YVTN repeat-like-containing domain superfamily||Armadillo-type fold||Domain of unknown function DUF1088||WD40 repeat||-||Domain of unknown function DUF4704
hsa_circ_0006866	4	87183202	87195690	-	12488	1103	ENSG00000145332;	exon:87183203-87183389	KLHL8	BTB/POZ domain||-||Galactose oxidase/kelch, beta-propeller||Kelch-type beta propeller||BTB-kelch protein||SKP1/BTB/POZ domain superfamily||BTB/Kelch-associated||Kelch repeat type 1||Kelch-like protein 8
hsa_circ_0006865	4	39841947	39844801	-	2854	255	ENSG00000121892;	exon:39841948-39842056	PDS5A	Sister chromatid cohesion protein Pds5||-||Armadillo-like helical||Armadillo-type fold
hsa_circ_0006864	11	103303092	103316620	+	13528	630	ENSG00000187240;	exon:103303093-103303253,exon:103304595-103304720,exon:103307721-103307831,exon:103311878-103312033,exon:103316545-103316620	DYNC2H1	P-loop containing nucleoside triphosphate hydrolase||Dynein heavy chain, coiled coil stalk||AAA+ ATPase domain||Dynein heavy chain, C-terminal domain||Dynein heavy chain, domain-1||-||Dynein heavy chain AAA lid domain||Dynein heavy chain, ATP-binding dynein motor region||Dynein heavy chain, domain-2||Dynein heavy chain, AAA module D4||Dynein heavy chain, hydrolytic ATP-binding dynein motor region…
novel_circ_0030422	5	132720608	132726498	-	5890	333	ENSG00000131437;	exon:132720609-132720714,exon:132726128-132726212,exon:132726354-132726498	KIF3A	Kinesin motor domain||P-loop containing nucleoside triphosphate hydrolase||Kinesin-like protein||Kinesin motor domain, conserved site||Kinesin motor domain superfamily||-
novel_circ_0030420	5	132699170	132703619	-	4449	280	ENSG00000131437;	exon:132699171-132699295,exon:132703463-132703619	KIF3A	Kinesin motor domain||P-loop containing nucleoside triphosphate hydrolase||Kinesin-like protein||Kinesin motor domain, conserved site||Kinesin motor domain superfamily||-
novel_circ_0030421	5	132699170	132711057	-	11887	192	ENSG00000131437;	exon:132699171-132699295,exon:132700216-132700284	KIF3A	Kinesin motor domain||P-loop containing nucleoside triphosphate hydrolase||Kinesin-like protein||Kinesin motor domain, conserved site||Kinesin motor domain superfamily||-
novel_circ_0027826	3	65018440	65050822	+	32382	406	ENSG00000241684;	intron:65018441-65018652,intron:65019560-65019651,intron:65050718-65050822	--	-
novel_circ_0027827	3	65361198	65364946	-	3748	434	ENSG00000151276;	exon:65361199-65361337,exon:65363465-65363608,exon:65364665-65364725,exon:65364853-65364946	MAGI1	Membrane-associated guanylate kinase, WW and PDZ domain-containing protein 1||PDZ domain||WW domain||PDZ superfamily||Guanylate kinase-like domain||Guanylate kinase/L-type calcium channel beta subunit||Guanylate kinase, conserved site||P-loop containing nucleoside triphosphate hydrolase||WW domain superfamily
novel_circ_0027824	3	65018440	65019651	+	1211	302	ENSG00000241684;	exon:65018441-65018652,exon:65019560-65019651	--	-
novel_circ_0027822	3	65010179	65019651	+	9472	91	ENSG00000241684;	exon:65019560-65019651	--	-
novel_circ_0027820	3	65008944	65018652	+	9708	334	ENSG00000241684;	exon:65008945-65009068,exon:65018441-65018652	--	-
novel_circ_0027821	3	65008944	65019651	+	10707	214	ENSG00000241684;	exon:65008945-65009068,exon:65019560-65019651	--	-
hsa_circ_0069435	4	38905521	38905861	+	340	221	ENSG00000197712;	exon:38905522-38905635,exon:38905755-38905861	FAM114A1	Protein of unknown function DUF719
hsa_circ_0069434	4	38878070	38878426	+	356	356	ENSG00000197712;	exon:38878071-38878426	FAM114A1	Protein of unknown function DUF719
hsa_circ_0082875	7	149552800	149558839	-	6039	448	ENSG00000133624;	exon:149552801-149553016,exon:149558608-149558839	--	-
hsa_circ_0069438	4	38986335	38993998	-	7663	465	ENSG00000121895;	exon:38986336-38986419	TMEM156	TMEM156 protein
hsa_circ_0043278	17	37437737	37440662	+	2925	250	ENSG00000276234;	exon:37437738-37437962,exon:37440509-37440662	TADA2A	ADA2-like, zinc finger, ZZ-type||-||Transcriptional adaptor 2||SANT domain||Homeobox-like domain superfamily||SWIRM domain||SANT/Myb domain
novel_circ_0016248	1	160317353	160332557	-	15204	398	ENSG00000122218;	intron:160317354-160317435,intron:160323431-160323530,intron:160325543-160325652,intron:160332448-160332557	COPA	-||WD40 repeat, conserved site||WD40-repeat-containing domain||WD40 repeat||WD40/YVTN repeat-like-containing domain superfamily||G-protein beta WD-40 repeat||Cytochrome cd1-nitrite reductase-like, haem d1 domain superfamily||Coatomer, WD associated region||Coatomer alpha subunit||WD40-repeat-containing domain superfamily||Coatomer, alpha subunit, C-terminal||Anaphase-promoting complex subunit 4, …
hsa_circ_0086376	9	14146688	14179780	-	33092	363	ENSG00000147862;	exon:14146689-14146807,exon:14150145-14150265,exon:14155825-14155893,exon:14179727-14179780	NFIB	CTF transcription factor/nuclear factor 1||CTF transcription factor/nuclear factor 1, conserved site||CTF transcription factor/nuclear factor 1, N-terminal||MAD homology 1, Dwarfin-type||CTF transcription factor/nuclear factor 1, DNA-binding domain
hsa_circ_0086375	9	14146688	14155893	-	9205	309	ENSG00000147862;	exon:14146689-14146807,exon:14150145-14150265,exon:14155825-14155893	NFIB	CTF transcription factor/nuclear factor 1||CTF transcription factor/nuclear factor 1, conserved site||CTF transcription factor/nuclear factor 1, N-terminal||MAD homology 1, Dwarfin-type||CTF transcription factor/nuclear factor 1, DNA-binding domain
hsa_circ_0004888	2	169603641	169614724	+	11083	616	ENSG00000138398;	exon:169603642-169603694,exon:169614464-169614493,exon:169614585-169614724	PPIG	Cyclophilin-type peptidyl-prolyl cis-trans isomerase, conserved site||Cyclophilin-type peptidyl-prolyl cis-trans isomerase domain||-||Cyclophilin-like domain superfamily
hsa_circ_0004887	20	56381432	56384324	-	2892	386	ENSG00000087586;	exon:56381433-56381571	AURKA	Aurora kinase A||Protein kinase domain||Protein kinase-like domain superfamily||Serine/threonine-protein kinase, active site||Aurora kinase||Protein kinase, ATP binding site
hsa_circ_0004885	1	6599046	6599452	-	406	406	ENSG00000162413;	exon:6599047-6599452	KLHL21	BTB/Kelch-associated||SKP1/BTB/POZ domain superfamily||BTB/POZ domain||Kelch repeat type 1||Kelch-type beta propeller||-||BTB-kelch protein
novel_circ_0011297	16	68157868	68183366	+	25498	380	ENSG00000072736;	exon:68157869-68158068,exon:68181475-68181530,exon:68183240-68183366	NFATC3	Rel homology dimerisation domain||p53-like transcription factor, DNA-binding||Nuclear factor of activated T cells (NFAT)||Rel homology domain (RHD), DNA-binding domain||Immunoglobulin E-set||IPT domain||Rel homology domain (RHD), DNA-binding domain superfamily||-||Immunoglobulin-like fold
novel_circ_0016242	1	160017610	160021071	-	3461	118	ENSG00000177807;	intron:160017611-160017729	KCNJ10	Potassium channel, inwardly rectifying, Kir||Potassium channel, inwardly rectifying, Kir, cytoplasmic||Inward rectifier potassium channel, C-terminal||Immunoglobulin E-set||-||Potassium channel, inwardly rectifying, Kir1.2||Potassium channel, inwardly rectifying, transmembrane domain
novel_circ_0018240	1	39841134	39848097	-	6963	223	ENSG00000043514;	exon:39847548-39847660,exon:39847986-39848097	TRIT1	P-loop containing nucleoside triphosphate hydrolase||Zinc finger C2H2 superfamily||-||Matrin/U1-C-like, C2H2-type zinc finger||tRNA isopentenyltransferase, eukaryotes||Zinc finger, double-stranded RNA binding||Dimethylallyltransferase||IPP transferase
novel_circ_0018241	1	39841134	39850261	-	9127	142	ENSG00000043514;	exon:39850119-39850261	TRIT1	P-loop containing nucleoside triphosphate hydrolase||Zinc finger C2H2 superfamily||-||Matrin/U1-C-like, C2H2-type zinc finger||tRNA isopentenyltransferase, eukaryotes||Zinc finger, double-stranded RNA binding||Dimethylallyltransferase||IPP transferase
hsa_circ_0004882	10	95637092	95643206	-	6114	470	ENSG00000059573;	exon:95637093-95637197	ALDH18A1	Delta l-pyrroline-5-carboxylate synthetase||Aldehyde dehydrogenase domain||Aspartate/glutamate/uridylate kinase||Gamma-glutamyl phosphate reductase GPR, conserved site||Glutamate/acetylglutamate kinase||Acetylglutamate kinase-like superfamily||Aldehyde dehydrogenase, C-terminal||Aldehyde dehydrogenase, N-terminal||Aldehyde/histidinol dehydrogenase||GPR domain||Glutamate 5-kinase, conserved site||…
novel_circ_0012286	17	37328838	37330425	-	1587	399	ENSG00000278540;	exon:37328839-37328986,exon:37330173-37330425	ACACA	Single hybrid motif||Biotin carboxylase-like, N-terminal domain||Biotin-binding site||Biotin carboxylase, C-terminal||Biotin/lipoyl attachment||Pre-ATP-grasp domain superfamily||Acetyl-coenzyme A carboxyltransferase, N-terminal||Acetyl-coenzyme A carboxyltransferase, C-terminal||Acetyl-CoA carboxylase, central domain||ClpP/crotonase-like domain superfamily||ATP-grasp fold, subdomain 1||Biotin car…
novel_circ_0034426	7	111977131	112004131	-	27000	329	ENSG00000128512;	exon:111977132-111977283,exon:111998448-111998503,exon:112000494-112000534,exon:112004048-112004131	DOCK4	Dedicator of cytokinesis, N-terminal domain||DHR-1 domain||SH3-like domain superfamily||Dedicator of cytokinesis||C2 domain superfamily||Dedicator of cytokinesis 4, SH3 domain||Dedicator of cytokinesis 4||SH3 domain||-||DHR-2 domain||Dedicator of cytokinesis B, C2 domain||Dedicator of cytokinesis, C-terminal
novel_circ_0016949	1	206605399	206612357	-	6958	457	ENSG00000143486;	exon:206605400-206605507,exon:206608236-206608326,exon:206611184-206611374,exon:206612287-206612357	EIF2D	PUA-like superfamily||Eukaryotic translation initiation factor 2D||SUI1 domain||Pre-PUA domain||SWIB/MDM2 domain superfamily||Eukaryotic translation initiation factor 2D, SUI1 domain||-||PUA domain||PUA domain superfamily||SUI1 domain superfamily
novel_circ_0015069	19	45517662	45521406	+	3744	420	ENSG00000125753;	exon:45517663-45517834,exon:45517929-45518094,exon:45521322-45521406	VASP	WH1/EVH1 domain||Vasodilator-stimulated phosphoprotein||Vasodilator-stimulated phosphoprotein/ENA/VASP-like||VASP tetramerisation domain superfamily||VASP tetramerisation||PH-like domain superfamily||-
hsa_circ_0045841	17	76754046	76776541	+	22495	544	ENSG00000092931;	exon:76754047-76754204,exon:76767386-76767451,exon:76776406-76776541	MFSD11	MFS transporter superfamily||Major facilitator superfamily domain||Ion channel regulatory protein, UNC-93||-
hsa_circ_0045842	17	76767385	76776541	+	9156	503	ENSG00000092931;	exon:76767386-76767451,exon:76769746-76769871,exon:76774997-76775171,exon:76776406-76776541	MFSD11	MFS transporter superfamily||Major facilitator superfamily domain||Ion channel regulatory protein, UNC-93||-
novel_circ_0033532	6	38078039	38082457	+	4418	307	ENSG00000156639;	intron:38078040-38078282,intron:38082392-38082457	ZFAND3	Zinc finger, A20-type||AN1-like Zinc finger||Zinc finger, AN1-type
hsa_circ_0044136	17	45030091	45034999	-	4908	518	ENSG00000172992;	exon:45030092-45030179,exon:45033935-45034042,exon:45034774-45034999	DCAKD	P-loop containing nucleoside triphosphate hydrolase||Dephospho-CoA kinase
novel_circ_0022990	2	218463305	218466176	-	2871	226	ENSG00000135913;	exon:218463306-218463366,exon:218466010-218466176	USP37	Peptidase C19, ubiquitin carboxyl-terminal hydrolase||Papain-like cysteine peptidase superfamily||Ubiquitin interacting motif||Ubiquitin carboxyl-terminal hydrolase 37, pleckstrin homology-like domain superfamily||Ubiquitin carboxyl-terminal hydrolase 37, pleckstrin homology-like domain||Ubiquitin specific protease domain||Ubiquitin specific protease, conserved site
novel_circ_0022993	2	218466009	218479715	-	13706	206	ENSG00000135913;	exon:218476840-218476981,exon:218479650-218479715	USP37	Peptidase C19, ubiquitin carboxyl-terminal hydrolase||Papain-like cysteine peptidase superfamily||Ubiquitin interacting motif||Ubiquitin carboxyl-terminal hydrolase 37, pleckstrin homology-like domain superfamily||Ubiquitin carboxyl-terminal hydrolase 37, pleckstrin homology-like domain||Ubiquitin specific protease domain||Ubiquitin specific protease, conserved site
novel_circ_0022995	2	218474629	218479715	-	5086	206	ENSG00000135913;	exon:218476840-218476981,exon:218479650-218479715	USP37	Peptidase C19, ubiquitin carboxyl-terminal hydrolase||Papain-like cysteine peptidase superfamily||Ubiquitin interacting motif||Ubiquitin carboxyl-terminal hydrolase 37, pleckstrin homology-like domain superfamily||Ubiquitin carboxyl-terminal hydrolase 37, pleckstrin homology-like domain||Ubiquitin specific protease domain||Ubiquitin specific protease, conserved site
novel_circ_0022997	2	218482069	218495950	-	13881	433	ENSG00000135913;	exon:218482070-218482234,exon:218485664-218485743,exon:218495760-218495950	USP37	Peptidase C19, ubiquitin carboxyl-terminal hydrolase||Papain-like cysteine peptidase superfamily||Ubiquitin interacting motif||Ubiquitin carboxyl-terminal hydrolase 37, pleckstrin homology-like domain superfamily||Ubiquitin carboxyl-terminal hydrolase 37, pleckstrin homology-like domain||Ubiquitin specific protease domain||Ubiquitin specific protease, conserved site
novel_circ_0022996	2	218474629	218488421	-	13792	196	ENSG00000135913;	exon:218485664-218485743,exon:218488304-218488421	USP37	Peptidase C19, ubiquitin carboxyl-terminal hydrolase||Papain-like cysteine peptidase superfamily||Ubiquitin interacting motif||Ubiquitin carboxyl-terminal hydrolase 37, pleckstrin homology-like domain superfamily||Ubiquitin carboxyl-terminal hydrolase 37, pleckstrin homology-like domain||Ubiquitin specific protease domain||Ubiquitin specific protease, conserved site
novel_circ_0022999	2	218509978	218530040	-	20062	245	ENSG00000135913;	exon:218509979-218510140,exon:218529956-218530040	USP37	Peptidase C19, ubiquitin carboxyl-terminal hydrolase||Papain-like cysteine peptidase superfamily||Ubiquitin interacting motif||Ubiquitin carboxyl-terminal hydrolase 37, pleckstrin homology-like domain superfamily||Ubiquitin carboxyl-terminal hydrolase 37, pleckstrin homology-like domain||Ubiquitin specific protease domain||Ubiquitin specific protease, conserved site
hsa_circ_0007803	1	9931890	9935627	-	3737	413	ENSG00000162441;	exon:9931891-9931972,exon:9932803-9932898,exon:9934762-9934860,exon:9935492-9935627	LZIC	Beta-catenin-interacting ICAT superfamily||Protein LZIC||Beta-catenin-interacting ICAT domain
hsa_circ_0007800	8	29338281	29340243	-	1962	366	ENSG00000120875;	exon:29338282-29338501,exon:29340098-29340243	DUSP4	Tyrosine specific protein phosphatases domain||Dual specificity phosphatase, catalytic domain||Rhodanese-like domain||Protein-tyrosine phosphatase-like||Dual specificity protein phosphatase domain||Protein-tyrosine phosphatase, active site||Rhodanese-like domain superfamily||Protein-tyrosine phosphatase, catalytic||Mitogen-activated protein (MAP) kinase phosphatase
hsa_circ_0007801	16	67616744	67621591	+	4847	405	ENSG00000102974;	exon:67616745-67616878,exon:67620697-67620817,exon:67621442-67621591	CTCF	Zinc finger C2H2 superfamily||-||Zinc finger C2H2-type
hsa_circ_0007806	5	132883339	132888160	-	4821	632	ENSG00000072364;	exon:132888097-132888160	AFF4	Transcription factor AF4/FMR2
hsa_circ_0007807	16	28152658	28156527	-	3869	581	ENSG00000169180;	exon:28152659-28152785,exon:28152930-28152964,exon:28155702-28155771,exon:28155946-28155975,exon:28156074-28156135,exon:28156447-28156527	XPO6	Armadillo-type fold||Importin-beta, N-terminal domain||Exportin-6||Armadillo-like helical||Exportin-1/Importin-beta-like||-
hsa_circ_0007808	18	9570156	9577191	-	7035	655	ENSG00000154845;	exon:9577064-9577191	PPP4R1	-||Putative WW-binding domain and destruction box||Armadillo-like helical||HEAT, type 2||Armadillo-type fold||Serine/threonine-protein phosphatase 4 regulatory subunit 1||HEAT repeat
hsa_circ_0055940	2	106122969	106129778	-	6809	287	ENSG00000115652;	exon:106122970-106123091,exon:106125620-106125679,exon:106129674-106129778	UXS1	NAD-dependent epimerase/dehydratase||NAD(P)-binding domain superfamily||UDP-glucuronate decarboxylase N-terminal||NAD(P)-binding domain
hsa_circ_0087421	9	87698655	87700237	+	1582	260	ENSG00000196730;	exon:87700117-87700237	DAPK1	Protein kinase domain||Protein kinase-like domain superfamily||Roc domain||Death-like domain superfamily||Ankyrin repeat-containing domain superfamily||Death-associated protein kinase 1||Ankyrin repeat-containing domain||-||Serine/threonine-protein kinase, active site||Ankyrin repeat||Death domain||P-loop containing nucleoside triphosphate hydrolase||Protein kinase, ATP binding site
novel_circ_0032114	5	96795041	96797309	-	2268	254	ENSG00000164307;	exon:96795042-96795162,exon:96797175-96797309	ERAP1	Aminopeptidase N-like , N-terminal||-||Aminopeptidase N-type||ERAP1-like C-terminal domain||Endoplasmic reticulum aninopeptidase 1||Peptidase M1, alanine aminopeptidase/leukotriene A4 hydrolase||Peptidase M1, membrane alanine aminopeptidase
novel_circ_0032116	5	96912636	96913457	+	821	301	ENSG00000164308;	exon:96912637-96912798,exon:96913317-96913457	ERAP2	Peptidase M1, membrane alanine aminopeptidase||Aminopeptidase N-type||-||ERAP2 aminopeptidase||Peptidase M1, alanine aminopeptidase/leukotriene A4 hydrolase||ERAP1-like C-terminal domain||Aminopeptidase N-like , N-terminal
novel_circ_0015534	1	107596211	107642755	-	46544	136	ENSG00000134215;	exon:107642619-107642755	VAV3	Dbl homology (DH) domain||Calmodulin-regulated spectrin-associated protein, CH domain||VAV3 protein, second SH3 domain||Pleckstrin homology domain||-||SH2 domain||CH domain superfamily||Calponin homology domain||Vav, PH domain||Dbl homology (DH) domain superfamily||PH-like domain superfamily||Guanine-nucleotide dissociation stimulator, CDC24, conserved site||SH3-like domain superfamily||Smooth mu…
hsa_circ_0081746	7	103308951	103310475	+	1524	305	ENSG00000105819;	exon:103308952-103309095,exon:103310315-103310475	PMPCB	Peptidase M16, N-terminal||Peptidase M16, zinc-binding site||Peptidase M16, C-terminal||Metalloenzyme, LuxS/M16 peptidase-like||Mitochondrial processing peptidase subunit beta||-
hsa_circ_0008285	6	4891712	4892379	+	667	667	ENSG00000153046;	exon:4891713-4892379	CDYL	Enoyl-CoA hydratase/isomerase||Chromo/chromo shadow domain||ClpP/crotonase-like domain superfamily||Chromo-like domain superfamily||Chromo domain, conserved site||Chromo domain subgroup||Chromo domain||Enoyl-CoA hydratase, C-terminal
hsa_circ_0081749	7	103316829	103319678	-	2849	255	ENSG00000105821;	exon:103316830-103317014,exon:103319609-103319678	DNAJC2	DnaJ domain||Ribosome-associated complex head domain||SANT domain||Homeobox-like domain superfamily||DnaJ domain, conserved site||Chaperone J-domain superfamily||-||SANT/Myb domain
hsa_circ_0040723	16	84990303	84996007	-	5704	418	ENSG00000153786;	exon:84990304-84990635,exon:84995922-84996007	ZDHHC7	-||Palmitoyltransferase, DHHC domain
hsa_circ_0001251	22	46792519	46797620	+	5101	575	ENSG00000054611;	exon:46792520-46792576	TBC1D22A	-||Rab-GTPase-TBC domain superfamily||Rab-GTPase-TBC domain
hsa_circ_0001250	22	46626750	46637960	+	11210	332	ENSG00000075240;	exon:46626751-46626961,exon:46637840-46637960	GRAMD4	GRAMDC4, PH-GRAM domain||GRAM domain-containing protein 4||GRAM domain||PH-like domain superfamily||-
hsa_circ_0001252	22	46974289	46997709	+	23420	186	ENSG00000054611;	exon:46974290-46974399,exon:46990015-46990110,exon:46997634-46997709	TBC1D22A	-||Rab-GTPase-TBC domain superfamily||Rab-GTPase-TBC domain
hsa_circ_0061766	21	39390697	39393280	+	2583	349	ENSG00000182093;ENSG00000285815;	exon:39390698-39390863,exon:39391769-39391836,exon:39393166-39393280	WRB;WRB-SH3BGR	-
hsa_circ_0001258	22	50372019	50394135	+	22116	374	ENSG00000100239;	exon:50372020-50372150,exon:50388986-50389111,exon:50393893-50394135	PPP6R2	SIT4 phosphatase-associated protein family||Armadillo-type fold
hsa_circ_0008286	3	17372074	17384015	-	11941	486	ENSG00000131374;	exon:17372075-17372247,exon:17383913-17384015	TBC1D5	Rab-GTPase-TBC domain||Rab-GTPase-TBC domain superfamily||-
novel_circ_0013880	18	35696215	35712110	-	15895	381	n/a	intergenic_region:35696216-35696339,intergenic_region:35696989-35697123,intergenic_region:35711986-35712110	--	-
hsa_circ_0004573	1	183114530	183115637	+	1107	307	ENSG00000135862;	exon:183114531-183114719,exon:183115520-183115637	LAMC1	Laminin, N-terminal||Laminin EGF domain||Laminin IV||EGF-like domain||Laminin, N-terminal domain superfamily
novel_circ_0017226	1	220136808	220141948	+	5140	227	ENSG00000067704;	exon:220136809-220136911,exon:220137918-220138043	IARS2	Isoleucyl tRNA synthetase type 1, anticodon-binding domain||Zinc finger, FPG/IleRS-type||Aminoacyl-tRNA synthetase, class Ia, anticodon-binding||Rossmann-like alpha/beta/alpha sandwich fold||Isoleucine-tRNA ligase||Valyl/Leucyl/Isoleucyl-tRNA synthetase, editing domain||Aminoacyl-tRNA synthetase, class I, conserved site||Aminoacyl-tRNA synthetase, class Ia||Methionyl/Valyl/Leucyl/Isoleucyl-tRNA s…
novel_circ_0017225	1	220136808	220140289	+	3481	464	ENSG00000067704;	exon:220136809-220136911,exon:220137918-220138043,exon:220139008-220139139,exon:220140183-220140289	IARS2	Isoleucyl tRNA synthetase type 1, anticodon-binding domain||Zinc finger, FPG/IleRS-type||Aminoacyl-tRNA synthetase, class Ia, anticodon-binding||Rossmann-like alpha/beta/alpha sandwich fold||Isoleucine-tRNA ligase||Valyl/Leucyl/Isoleucyl-tRNA synthetase, editing domain||Aminoacyl-tRNA synthetase, class I, conserved site||Aminoacyl-tRNA synthetase, class Ia||Methionyl/Valyl/Leucyl/Isoleucyl-tRNA s…
hsa_circ_0004570	2	37058450	37068930	-	10480	1132	ENSG00000008869;	exon:37058451-37058560,exon:37068681-37068930	HEATR5B	Laa1/Sip1/HEATR5||Armadillo-type fold||Armadillo-like helical
hsa_circ_0004577	4	88061905	88065879	+	3974	339	ENSG00000118762;	exon:88061906-88062004,exon:88065374-88065495,exon:88065613-88065664,exon:88065762-88065879	PKD2	Polycystin cation channel, PKD1/PKD2||Polycystic kidney disease type 2 protein||EF-hand domain||Voltage-dependent channel domain superfamily||EF-hand domain pair
hsa_circ_0004576	17	66687110	66689047	+	1937	389	ENSG00000154229;	exon:66687111-66687267,exon:66688302-66688436,exon:66688951-66689047	PRKCA	Protein kinase C-like, phorbol ester/diacylglycerol-binding domain||Protein kinase C, alpha/beta/gamma types||Serine/threonine-protein kinase, active site||-||C2 domain||Protein kinase, ATP binding site||Diacylglycerol/phorbol-ester binding||C2 domain superfamily||Protein kinase-like domain superfamily||Protein kinase domain||AGC-kinase, C-terminal||Classical Protein Kinase C alpha, catalytic dom…
hsa_circ_0004575	2	205440369	205440672	+	303	303	ENSG00000116117;	exon:205440370-205440672	PARD3B	Par3/HAL, N-terminal||PDZ domain||PDZ superfamily||-
hsa_circ_0004578	18	21765771	21791557	+	25786	863	ENSG00000101752;	exon:21765772-21765943,exon:21768623-21768681,exon:21791335-21791557	MIB1	Mib-herc2||Mib/herc2 domain superfamily||Ankyrin repeat||Zinc finger, ZZ-type||Zinc finger, RING-type||Mind bomb, SH3 repeat domain||Zinc finger, RING/FYVE/PHD-type||Ankyrin repeat-containing domain||E3 ubiquitin-protein ligase MIB1/2, zinc finger, ZZ-type||Ankyrin repeat-containing domain superfamily
novel_circ_0017228	1	220170891	220190146	-	19255	82	ENSG00000118873;	exon:220190064-220190146	RAB3GAP2	Rab3GAP regulatory subunit, C-terminal||Rab3-GAP regulatory subunit, N-terminal||-||Rab3-GAP regulatory subunit
novel_circ_0013888	18	36141136	36164667	+	23531	392	ENSG00000134759;	exon:36141137-36141201,exon:36142830-36142966,exon:36164475-36164667	ELP2	-||Elongator complex protein 2||Galactose oxidase/kelch, beta-propeller||WD40-repeat-containing domain||WD40 repeat||Quinoprotein alcohol dehydrogenase-like superfamily||WD40/YVTN repeat-like-containing domain superfamily||WD40-repeat-containing domain superfamily
novel_circ_0010164	15	85664562	85693451	+	28889	366	ENSG00000170776;	exon:85664563-85664755,exon:85693277-85693451	AKAP13	RII binding domain||Pleckstrin homology domain||A-kinase anchor protein 13||Dbl homology (DH) domain||PH-like domain superfamily||Dbl homology (DH) domain superfamily||ARHGEF1-like, PH domain||Protein kinase C-like, phorbol ester/diacylglycerol-binding domain||-
hsa_circ_0019603	10	101790895	101807901	-	17006	1974	ENSG00000198408;	exon:101807730-101807901	OGA	Glycoside hydrolase superfamily||Beta-N-acetylglucosaminidase||Acyl-CoA N-acyltransferase
hsa_circ_0019602	10	101787363	101807901	-	20538	2134	ENSG00000198408;	exon:101787364-101787523	OGA	Glycoside hydrolase superfamily||Beta-N-acetylglucosaminidase||Acyl-CoA N-acyltransferase
novel_circ_0010166	15	85664562	85710645	+	46083	300	ENSG00000170776;	exon:85664563-85664755,exon:85669722-85669830	AKAP13	RII binding domain||Pleckstrin homology domain||A-kinase anchor protein 13||Dbl homology (DH) domain||PH-like domain superfamily||Dbl homology (DH) domain superfamily||ARHGEF1-like, PH domain||Protein kinase C-like, phorbol ester/diacylglycerol-binding domain||-
hsa_circ_0019607	10	101792838	101810314	-	17476	1826	ENSG00000198408;	exon:101792839-101792943,exon:101793913-101793998,exon:101797980-101798154,exon:101807730-101807901,exon:101810184-101810314	OGA	Glycoside hydrolase superfamily||Beta-N-acetylglucosaminidase||Acyl-CoA N-acyltransferase
hsa_circ_0019606	10	101792838	101807901	-	15063	1695	ENSG00000198408;	exon:101792839-101792943,exon:101807730-101807901	OGA	Glycoside hydrolase superfamily||Beta-N-acetylglucosaminidase||Acyl-CoA N-acyltransferase
novel_circ_0023110	2	229836847	229860531	-	23684	261	ENSG00000153827;	exon:229836848-229836984,exon:229860406-229860531	TRIP12	Armadillo-type fold||WWE domain, subgroup||-||HECT domain||WWE domain superfamily||Armadillo-like helical||HECT, E3 ligase catalytic domain||WWE domain
hsa_circ_0015957	1	201996146	201997554	+	1408	353	ENSG00000176393;	exon:201996147-201996263,exon:201997319-201997554	RNPEP	Armadillo-type fold||Peptidase M1, membrane alanine aminopeptidase||-||Peptidase M1, alanine aminopeptidase/leukotriene A4 hydrolase||Peptidase M4/M1, CTD superfamily||Peptidase M1, leukotriene A4 hydrolase/aminopeptidase C-terminal||Peptidase M1 LTA-4 hydrolase/aminopeptidase, C-terminal domain superfamily||Peptidase M1, aminopeptidase B||Aminopeptidase, leukotriene A4 hydrolase-like||Aminopepti…
hsa_circ_0019609	10	101797979	101810314	-	12335	1635	ENSG00000198408;	exon:101810184-101810314	OGA	Glycoside hydrolase superfamily||Beta-N-acetylglucosaminidase||Acyl-CoA N-acyltransferase
hsa_circ_0015954	1	201988903	201997554	+	8651	643	ENSG00000176393;	exon:201988904-201989044	RNPEP	Armadillo-type fold||Peptidase M1, membrane alanine aminopeptidase||-||Peptidase M1, alanine aminopeptidase/leukotriene A4 hydrolase||Peptidase M4/M1, CTD superfamily||Peptidase M1, leukotriene A4 hydrolase/aminopeptidase C-terminal||Peptidase M1 LTA-4 hydrolase/aminopeptidase, C-terminal domain superfamily||Peptidase M1, aminopeptidase B||Aminopeptidase, leukotriene A4 hydrolase-like||Aminopepti…
novel_circ_0023118	2	230169046	230170761	-	1715	330	ENSG00000135899;	exon:230169047-230169237,exon:230170621-230170761	SP110	SAND-like domain superfamily||Zinc finger, FYVE/PHD-type||Bromodomain-like superfamily||Zinc finger, PHD-finger||Bromodomain||Zinc finger, PHD-type, conserved site||SAND domain||HSR domain||Zinc finger, PHD-type
novel_circ_0023119	2	230198964	230214074	+	15110	348	ENSG00000135899;	intron:230198965-230199083,intron:230213654-230213769,intron:230213959-230214074	SP110	SAND-like domain superfamily||Zinc finger, FYVE/PHD-type||Bromodomain-like superfamily||Zinc finger, PHD-finger||Bromodomain||Zinc finger, PHD-type, conserved site||SAND domain||HSR domain||Zinc finger, PHD-type
novel_circ_0035461	7	42148225	42223295	-	75070	407	ENSG00000106571;	exon:42148226-42148468,exon:42223130-42223295	GLI3	Transcription factor GLI3||Zinc finger C2H2 superfamily||Zinc finger C2H2-type||-
novel_circ_0035460	7	42148225	42172686	-	24461	408	ENSG00000106571;	exon:42148226-42148468,exon:42172520-42172686	GLI3	Transcription factor GLI3||Zinc finger C2H2 superfamily||Zinc finger C2H2-type||-
novel_circ_0035462	7	42591380	42598349	-	6969	430	n/a	intergenic_region:42591381-42591522,intergenic_region:42595652-42595720,intergenic_region:42597448-42597551,intergenic_region:42598231-42598349	--	-
novel_circ_0035465	7	42917132	42917835	-	703	57	ENSG00000106588;	exon:42917778-42917835	PSMA2	Proteasome alpha-subunit, N-terminal domain||-||Nucleophile aminohydrolases, N-terminal||Proteasome alpha-type subunit||Proteasome subunit alpha2||Proteasome, subunit alpha/beta
novel_circ_0013588	18	13666478	13682105	-	15627	234	ENSG00000177150;	exon:13666479-13666713	FAM210A	Domain of unknown function DUF1279||-
novel_circ_0035466	7	43595900	43596113	+	213	212	ENSG00000164543;	exon:43595901-43596113	STK17A	-||Protein kinase domain||Protein kinase-like domain superfamily||Serine/threonine-protein kinase, active site||Protein kinase, ATP binding site
novel_circ_0026692	3	195516841	195524896	-	8055	77	ENSG00000184203;	exon:195524819-195524896	PPP1R2	-||Protein phosphatase inhibitor 2 (IPP-2)
novel_circ_0026691	3	195410706	195412916	-	2210	467	ENSG00000114331;	exon:195410707-195411009,exon:195411756-195411851,exon:195412846-195412916	ACAP2	Pleckstrin homology domain||Ankyrin repeat-containing domain||Ankyrin repeat-containing domain superfamily||ArfGAP domain superfamily||AH/BAR domain superfamily||Ankyrin repeat||Arf GTPase activating protein||PH-like domain superfamily||ARFGAP/RecO-like zinc finger||-
hsa_circ_0085112	8	100220278	100225339	+	5061	320	ENSG00000104450;	exon:100220279-100220431,exon:100225173-100225339	SPAG1	Tetratricopeptide repeat-containing domain||Tetratricopeptide repeat 1||Tetratricopeptide-like helical domain superfamily||Tetratricopeptide repeat||RNA-polymerase II-associated protein 3-like, C-terminal domain
hsa_circ_0001922	X	53645310	53654131	-	8813	528	ENSG00000086758;	exon:53645311-53645463,exon:53647368-53647574,exon:53648212-53648310,exon:53654063-53654131	HUWE1	E3 ubiquitin ligase, domain of unknown function DUF913||Armadillo-type fold||-||HUWE1/Rev1, ubiquitin binding region||HECT domain||WWE domain superfamily||UBA-like superfamily||HECT, E3 ligase catalytic domain||WWE domain||Ubiquitin-associated domain||HUWE1, UBA domain||E3 ubiquitin ligase, domain of unknown function DUF908
hsa_circ_0001921	X	53403565	53403893	-	328	224	ENSG00000072501;	exon:53403566-53403672,exon:53403777-53403893	SMC1A	P-loop containing nucleoside triphosphate hydrolase||Structural maintenance of chromosomes protein 1A, metazoan||SMCs flexible hinge||-||Structural maintenance of chromosomes protein||RecF/RecN/SMC, N-terminal||SMCs flexible hinge superfamily
novel_circ_0016577	1	179986168	179992221	+	6053	451	ENSG00000135837;	exon:179986169-179986254,exon:179987243-179987286,exon:179990507-179990621,exon:179990742-179990792,exon:179992062-179992221	CEP350	CAP Gly-rich domain superfamily||Centrosome-associated protein 350||Domain of unknown function DUF4378||CAP Gly-rich domain||-
novel_circ_0016570	1	179846106	179852811	-	6705	179	ENSG00000169905;	exon:179852632-179852811	TOR1AIP2	-||LAP1C-like, C-terminal domain superfamily||Lamina-associated polypeptide 1C
hsa_circ_0085114	8	100225172	100233537	+	8365	427	ENSG00000104450;	exon:100233411-100233537	SPAG1	Tetratricopeptide repeat-containing domain||Tetratricopeptide repeat 1||Tetratricopeptide-like helical domain superfamily||Tetratricopeptide repeat||RNA-polymerase II-associated protein 3-like, C-terminal domain
hsa_circ_0001924	X	65051461	65075912	+	24451	24451	n/a	intergenic_region:65075474-65075670,intergenic_region:65075844-65075912	--	-
novel_circ_0016578	1	179986168	179997175	+	11007	128	ENSG00000135837;	exon:179986169-179986254,exon:179987243-179987286	CEP350	CAP Gly-rich domain superfamily||Centrosome-associated protein 350||Domain of unknown function DUF4378||CAP Gly-rich domain||-
novel_circ_0016579	1	179986168	180006567	+	20399	468	ENSG00000135837;	exon:179986169-179986254,exon:179987243-179987286,exon:179990507-179990621,exon:180003174-180003287,exon:180006454-180006567	CEP350	CAP Gly-rich domain superfamily||Centrosome-associated protein 350||Domain of unknown function DUF4378||CAP Gly-rich domain||-
novel_circ_0029879	4	84829003	84837090	-	8087	347	ENSG00000163625;	exon:84829004-84829190,exon:84836929-84837090	WDFY3	PH-BEACH domain||WD40-repeat-containing domain superfamily||BEACH domain superfamily||Zinc finger, RING/FYVE/PHD-type||BEACH domain||WD40/YVTN repeat-like-containing domain superfamily||Concanavalin A-like lectin/glucanase domain superfamily||Armadillo-type fold||WD40-repeat-containing domain||WD40 repeat||-||Zinc finger, FYVE-related||Zinc finger, FYVE/PHD-type||FYVE zinc finger||WD40 repeat, co…
novel_circ_0029878	4	84826814	84829190	-	2376	352	ENSG00000163625;	exon:84826815-84826981,exon:84829004-84829190	WDFY3	PH-BEACH domain||WD40-repeat-containing domain superfamily||BEACH domain superfamily||Zinc finger, RING/FYVE/PHD-type||BEACH domain||WD40/YVTN repeat-like-containing domain superfamily||Concanavalin A-like lectin/glucanase domain superfamily||Armadillo-type fold||WD40-repeat-containing domain||WD40 repeat||-||Zinc finger, FYVE-related||Zinc finger, FYVE/PHD-type||FYVE zinc finger||WD40 repeat, co…
hsa_circ_0046188	17	81588943	81608822	-	19879	846	ENSG00000182446;	exon:81588944-81589104,exon:81608728-81608822	NPLOC4	Zinc finger, RanBP2-type superfamily||Nuclear protein localization protein 4||NPL4, zinc-binding putative||Nuclear pore localisation protein Npl4, ubiquitin-like domain||-||Zinc finger, RanBP2-type||Nuclear pore localisation protein NPL4, C-terminal||MPN domain||Ubiquitin-like domain superfamily
novel_circ_0029876	4	84780107	84783074	-	2967	190	ENSG00000163625;	exon:84780108-84780298	WDFY3	PH-BEACH domain||WD40-repeat-containing domain superfamily||BEACH domain superfamily||Zinc finger, RING/FYVE/PHD-type||BEACH domain||WD40/YVTN repeat-like-containing domain superfamily||Concanavalin A-like lectin/glucanase domain superfamily||Armadillo-type fold||WD40-repeat-containing domain||WD40 repeat||-||Zinc finger, FYVE-related||Zinc finger, FYVE/PHD-type||FYVE zinc finger||WD40 repeat, co…
novel_circ_0029875	4	84774819	84794979	-	20160	100	ENSG00000163625;	exon:84794879-84794979	WDFY3	PH-BEACH domain||WD40-repeat-containing domain superfamily||BEACH domain superfamily||Zinc finger, RING/FYVE/PHD-type||BEACH domain||WD40/YVTN repeat-like-containing domain superfamily||Concanavalin A-like lectin/glucanase domain superfamily||Armadillo-type fold||WD40-repeat-containing domain||WD40 repeat||-||Zinc finger, FYVE-related||Zinc finger, FYVE/PHD-type||FYVE zinc finger||WD40 repeat, co…
novel_circ_0029874	4	84765809	84766372	-	563	337	ENSG00000163625;	exon:84765810-84766027,exon:84766252-84766372	WDFY3	PH-BEACH domain||WD40-repeat-containing domain superfamily||BEACH domain superfamily||Zinc finger, RING/FYVE/PHD-type||BEACH domain||WD40/YVTN repeat-like-containing domain superfamily||Concanavalin A-like lectin/glucanase domain superfamily||Armadillo-type fold||WD40-repeat-containing domain||WD40 repeat||-||Zinc finger, FYVE-related||Zinc finger, FYVE/PHD-type||FYVE zinc finger||WD40 repeat, co…
hsa_circ_0071278	4	152829624	152872564	+	42940	420	ENSG00000164144;	exon:152829625-152829726,exon:152863606-152863714,exon:152872452-152872564	ARFIP1	AH/BAR domain superfamily||Arfaptin family||Arfaptin homology (AH) domain||Arfaptin-1
hsa_circ_0071271	4	152332595	152337936	-	5341	259	ENSG00000109670;	exon:152332596-152332719,exon:152335641-152335689,exon:152337802-152337936	FBXW7	WD40-repeat-containing domain superfamily||WD40/YVTN repeat-like-containing domain superfamily||G-protein beta WD-40 repeat||F-box domain||WD40 repeat||WD40-repeat-containing domain||F-box-like domain superfamily||-||WD40 repeat, conserved site
novel_circ_0027127	3	33687059	33696933	-	9874	244	ENSG00000163539;	exon:33687060-33687135,exon:33688277-33688368,exon:33696855-33696933	CLASP2	Armadillo-like helical||Armadillo-type fold||HEAT, type 2||CLIP-associating protein 1||-||CLASP N-terminal domain||TOG domain
hsa_circ_0014601	1	155668626	155675096	-	6470	555	ENSG00000163374;	exon:155668627-155668777,exon:155670320-155670464,exon:155675010-155675096	YY1AP1	YY1-associated protein 1||GON-4-like protein||-
hsa_circ_0072899	5	71532307	71542265	+	9958	640	ENSG00000145734;	exon:71532308-71532427	BDP1	SANT/Myb domain||Transcription factor TFIIIB component B'', Myb domain||Homeobox-like domain superfamily||-
hsa_circ_0014606	1	155676547	155679512	-	2965	459	ENSG00000163374;	exon:155676548-155676765,exon:155679409-155679512	YY1AP1	YY1-associated protein 1||GON-4-like protein||-
novel_circ_0028697	4	152872451	152888307	+	15856	286	ENSG00000164144;	exon:152872452-152872564,exon:152888133-152888307	ARFIP1	AH/BAR domain superfamily||Arfaptin family||Arfaptin homology (AH) domain||Arfaptin-1
novel_circ_0028698	4	152880962	152888307	+	7345	395	ENSG00000164144;	exon:152880963-152881184,exon:152888133-152888307	ARFIP1	AH/BAR domain superfamily||Arfaptin family||Arfaptin homology (AH) domain||Arfaptin-1
hsa_circ_0012732	1	58671869	58685251	-	13382	1262	ENSG00000162601;	exon:58671870-58671958	MYSM1	MPN domain||SANT/Myb domain||-||Homeobox-like domain superfamily||SANT domain||SWIRM domain||JAB1/MPN/MOV34 metalloenzyme domain||Histone H2A deubiquitinase MYSM1
hsa_circ_0012733	1	58673572	58677056	-	3484	313	ENSG00000162601;	exon:58673573-58673650,exon:58675477-58675580,exon:58676926-58677056	MYSM1	MPN domain||SANT/Myb domain||-||Homeobox-like domain superfamily||SANT domain||SWIRM domain||JAB1/MPN/MOV34 metalloenzyme domain||Histone H2A deubiquitinase MYSM1
hsa_circ_0012738	1	58675476	58685251	-	9775	1095	ENSG00000162601;	exon:58675477-58675580,exon:58676926-58677056,exon:58685153-58685251	MYSM1	MPN domain||SANT/Myb domain||-||Homeobox-like domain superfamily||SANT domain||SWIRM domain||JAB1/MPN/MOV34 metalloenzyme domain||Histone H2A deubiquitinase MYSM1
novel_circ_0015175	19	49621524	49625200	+	3676	338	ENSG00000126464;	exon:49621525-49621622,exon:49624844-49624990,exon:49625105-49625200	PRR12	Domain of unknown function DUF4211
novel_circ_0015171	19	49449474	49450848	-	1374	245	ENSG00000104872;	exon:49449475-49449654,exon:49450782-49450848	PIH1D1	-||PIH1D1/2/3, CS-like domain||PIH1, N-terminal
novel_circ_0015173	19	49480297	49480620	+	323	178	ENSG00000273189;ENSG00000090554;	exon:49480298-49480476	--;FLT3LG	-
novel_circ_0015172	19	49478908	49480620	+	1712	206	ENSG00000273189;ENSG00000090554;	exon:49478909-49479047,exon:49480552-49480620	--;FLT3LG	-
novel_circ_0030042	4	94264706	94270818	+	6112	289	ENSG00000163104;	exon:94264707-94264906,exon:94270728-94270818	SMARCAD1	-||P-loop containing nucleoside triphosphate hydrolase||SNF2-like, N-terminal domain superfamily||Helicase superfamily 1/2, ATP-binding domain||Helicase, C-terminal||SNF2-related, N-terminal domain||Ubiquitin system component CUE
novel_circ_0023805	2	38002874	38017235	+	14361	182	ENSG00000115841;	exon:38003991-38004044,exon:38004136-38004216,exon:38017186-38017235	RMDN2	Tetratricopeptide-like helical domain superfamily||-
novel_circ_0023806	2	38100923	38131614	+	30691	485	ENSG00000232973;	exon:38100924-38101066,exon:38121985-38122225,exon:38131511-38131614	--	-
novel_circ_0023802	2	37974039	37997514	+	23475	349	ENSG00000115841;	exon:37974040-37974214,exon:37991220-37991297,exon:37997416-37997514	RMDN2	Tetratricopeptide-like helical domain superfamily||-
hsa_circ_0006320	8	22474953	22498112	+	23159	435	ENSG00000120910;	exon:22474954-22475151,exon:22475500-22475624,exon:22498001-22498112	PPP3CC	Serine/threonine-specific protein phosphatase/bis(5-nucleosyl)-tetraphosphatase||Metallo-dependent phosphatase-like||PP2B, metallophosphatase domain||Calcineurin-like phosphoesterase domain, ApaH type
hsa_circ_0006323	1	97515725	97549744	-	34019	401	ENSG00000188641;	exon:97515726-97515941,exon:97549560-97549744	DPYD	FAD/NAD(P)-binding domain superfamily||FAD/NAD(P)-binding domain||Dihydroorotate dehydrogenase domain||4Fe-4S ferredoxin-type, iron-sulphur binding domain||Aldolase-type TIM barrel||Alpha-helical ferredoxin||Dihydroprymidine dehydrogenase domain II||4Fe-4S ferredoxin, iron-sulphur binding, conserved site
hsa_circ_0006324	1	197642710	197658369	-	15659	376	ENSG00000213047;	exon:197642711-197642821,exon:197645690-197645743,exon:197647055-197647114,exon:197652235-197652315,exon:197658300-197658369	DENND1B	-||uDENN domain||dDENN domain||cDENN domain||DENN domain-containing protein 1A/1B/1C||Tripartite DENN domain
novel_circ_0023809	2	38121411	38131614	+	10203	213	ENSG00000232973;	exon:38121412-38121522,exon:38131511-38131614	--	-
novel_circ_0005879	12	85098354	85106615	+	8261	166	ENSG00000133640;	exon:85104004-85104077,exon:85106522-85106615	LRRIQ1	P-loop containing nucleoside triphosphate hydrolase||Leucine-rich repeat, typical subtype||IQ motif, EF-hand binding site||-||Leucine-rich repeat domain superfamily||Leucine-rich repeat
novel_circ_0005878	12	85065261	85066898	+	1637	302	ENSG00000133640;	exon:85065262-85065414,exon:85066748-85066898	LRRIQ1	P-loop containing nucleoside triphosphate hydrolase||Leucine-rich repeat, typical subtype||IQ motif, EF-hand binding site||-||Leucine-rich repeat domain superfamily||Leucine-rich repeat
novel_circ_0008888	15	41069569	41079904	-	10335	378	ENSG00000128908;	exon:41069570-41069665,exon:41070467-41070547,exon:41079701-41079904	INO80	DBINO domain||-||SNF2-related, N-terminal domain||P-loop containing nucleoside triphosphate hydrolase||DNA helicase Ino80||SNF2-like, N-terminal domain superfamily||Helicase superfamily 1/2, ATP-binding domain||Helicase, C-terminal
novel_circ_0021408	2	108791674	108805008	+	13334	246	ENSG00000163006;	exon:108791675-108791802,exon:108804889-108805008	CCDC138	Coiled-coil domain-containing protein 138||-
novel_circ_0008883	15	41055246	41079904	-	24658	320	ENSG00000128908;	exon:41055247-41055364,exon:41079701-41079904	INO80	DBINO domain||-||SNF2-related, N-terminal domain||P-loop containing nucleoside triphosphate hydrolase||DNA helicase Ino80||SNF2-like, N-terminal domain superfamily||Helicase superfamily 1/2, ATP-binding domain||Helicase, C-terminal
novel_circ_0021407	2	108791674	108794721	+	3047	381	ENSG00000163006;	exon:108791675-108791802,exon:108792359-108792432,exon:108794540-108794721	CCDC138	Coiled-coil domain-containing protein 138||-
novel_circ_0021404	2	108788851	108798586	+	9735	158	ENSG00000163006;	exon:108798428-108798586	CCDC138	Coiled-coil domain-containing protein 138||-
novel_circ_0021405	2	108788851	108805008	+	16157	158	ENSG00000163006;	exon:108798428-108798586	CCDC138	Coiled-coil domain-containing protein 138||-
novel_circ_0008886	15	41069569	41072058	-	2489	384	ENSG00000128908;	exon:41069570-41069665,exon:41070467-41070547,exon:41071849-41072058	INO80	DBINO domain||-||SNF2-related, N-terminal domain||P-loop containing nucleoside triphosphate hydrolase||DNA helicase Ino80||SNF2-like, N-terminal domain superfamily||Helicase superfamily 1/2, ATP-binding domain||Helicase, C-terminal
novel_circ_0008884	15	41055246	41092182	-	36936	201	ENSG00000128908;	exon:41055247-41055364,exon:41056622-41056706	INO80	DBINO domain||-||SNF2-related, N-terminal domain||P-loop containing nucleoside triphosphate hydrolase||DNA helicase Ino80||SNF2-like, N-terminal domain superfamily||Helicase superfamily 1/2, ATP-binding domain||Helicase, C-terminal
novel_circ_0029259	4	39304813	39306701	-	1888	223	ENSG00000035928;	exon:39304814-39304928,exon:39306592-39306701	RFC1	DNA polymerase III, clamp loader complex, gamma/delta/delta subunit, C-terminal||-||BRCT domain||P-loop containing nucleoside triphosphate hydrolase||AAA+ ATPase domain||ATPase, AAA-type, core||BRCT domain superfamily||DNA replication factor RFC1, C-terminal||Replication factor C subunit 1
novel_circ_0029258	4	39302277	39303151	-	874	421	ENSG00000035928;	exon:39302278-39302376,exon:39302500-39302595,exon:39302737-39302874,exon:39303060-39303151	RFC1	DNA polymerase III, clamp loader complex, gamma/delta/delta subunit, C-terminal||-||BRCT domain||P-loop containing nucleoside triphosphate hydrolase||AAA+ ATPase domain||ATPase, AAA-type, core||BRCT domain superfamily||DNA replication factor RFC1, C-terminal||Replication factor C subunit 1
novel_circ_0040037	X	150736594	150744453	+	7859	92	ENSG00000063601;	exon:150744361-150744453	MTMR1	GRAM domain||PH-like domain superfamily||-||Protein-tyrosine phosphatase-like||Tyrosine specific protein phosphatases domain||Myotubularin-like phosphatase domain||Protein-tyrosine phosphatase, catalytic||Protein-tyrosine phosphatase, active site||Myotubularin-related protein 1||MTMR1, PH-GRAM||Myotubularin family
novel_circ_0029252	4	39224883	39228690	+	3807	353	ENSG00000157796;	exon:39224884-39225033,exon:39228486-39228690	WDR19	Tetratricopeptide-like helical domain superfamily||WD40 repeat||WD40-repeat-containing domain||WDR19, WD40 repeat||-||WD repeat-containing protein 19/dyf-2||WD40-repeat-containing domain superfamily||Anaphase-promoting complex subunit 4, WD40 domain||WD40/YVTN repeat-like-containing domain superfamily
novel_circ_0029251	4	39113019	39115330	+	2311	171	ENSG00000109790;	exon:39115159-39115330	KLHL5	SKP1/BTB/POZ domain superfamily||BTB/Kelch-associated||BTB/POZ domain||-||Kelch repeat type 1||Kelch-type beta propeller||BTB-kelch protein
novel_circ_0029256	4	39244247	39245452	+	1205	305	ENSG00000157796;	exon:39244248-39244388,exon:39244470-39244552,exon:39245369-39245452	WDR19	Tetratricopeptide-like helical domain superfamily||WD40 repeat||WD40-repeat-containing domain||WDR19, WD40 repeat||-||WD repeat-containing protein 19/dyf-2||WD40-repeat-containing domain superfamily||Anaphase-promoting complex subunit 4, WD40 domain||WD40/YVTN repeat-like-containing domain superfamily
novel_circ_0029254	4	39224883	39234875	+	9992	258	ENSG00000157796;	exon:39224884-39225033,exon:39234766-39234875	WDR19	Tetratricopeptide-like helical domain superfamily||WD40 repeat||WD40-repeat-containing domain||WDR19, WD40 repeat||-||WD repeat-containing protein 19/dyf-2||WD40-repeat-containing domain superfamily||Anaphase-promoting complex subunit 4, WD40 domain||WD40/YVTN repeat-like-containing domain superfamily
novel_circ_0017762	1	244408711	244417752	-	9041	201	ENSG00000035687;	exon:244408712-244408760,exon:244409485-244409638	ADSS	Adenylosuccinate synthase, GTP-binding site||Adenylosuccinate synthetase, domain 3||Adenylosuccinate synthase, active site||Adenylosuccinate synthetase||P-loop containing nucleoside triphosphate hydrolase||Adenylosuccinate synthetase, domain 2||Adenylosuccinate synthetase isozyme 2, chordates||Adenylosuccinate synthetase, domain 1
novel_circ_0017766	1	244409484	244437768	-	28284	153	ENSG00000035687;	exon:244409485-244409638	ADSS	Adenylosuccinate synthase, GTP-binding site||Adenylosuccinate synthetase, domain 3||Adenylosuccinate synthase, active site||Adenylosuccinate synthetase||P-loop containing nucleoside triphosphate hydrolase||Adenylosuccinate synthetase, domain 2||Adenylosuccinate synthetase isozyme 2, chordates||Adenylosuccinate synthetase, domain 1
novel_circ_0017767	1	244411286	244437768	-	26482	149	ENSG00000035687;	exon:244411287-244411436	ADSS	Adenylosuccinate synthase, GTP-binding site||Adenylosuccinate synthetase, domain 3||Adenylosuccinate synthase, active site||Adenylosuccinate synthetase||P-loop containing nucleoside triphosphate hydrolase||Adenylosuccinate synthetase, domain 2||Adenylosuccinate synthetase isozyme 2, chordates||Adenylosuccinate synthetase, domain 1
novel_circ_0017764	1	244408711	244437768	-	29057	48	ENSG00000035687;	exon:244408712-244408760	ADSS	Adenylosuccinate synthase, GTP-binding site||Adenylosuccinate synthetase, domain 3||Adenylosuccinate synthase, active site||Adenylosuccinate synthetase||P-loop containing nucleoside triphosphate hydrolase||Adenylosuccinate synthetase, domain 2||Adenylosuccinate synthetase isozyme 2, chordates||Adenylosuccinate synthetase, domain 1
novel_circ_0017765	1	244409484	244417752	-	8268	250	ENSG00000035687;	exon:244409485-244409638,exon:244415981-244416078	ADSS	Adenylosuccinate synthase, GTP-binding site||Adenylosuccinate synthetase, domain 3||Adenylosuccinate synthase, active site||Adenylosuccinate synthetase||P-loop containing nucleoside triphosphate hydrolase||Adenylosuccinate synthetase, domain 2||Adenylosuccinate synthetase isozyme 2, chordates||Adenylosuccinate synthetase, domain 1
novel_circ_0040032	X	150718624	150737448	+	18824	375	ENSG00000063601;	exon:150718625-150718700,exon:150727215-150727309,exon:150737242-150737448	MTMR1	GRAM domain||PH-like domain superfamily||-||Protein-tyrosine phosphatase-like||Tyrosine specific protein phosphatases domain||Myotubularin-like phosphatase domain||Protein-tyrosine phosphatase, catalytic||Protein-tyrosine phosphatase, active site||Myotubularin-related protein 1||MTMR1, PH-GRAM||Myotubularin family
novel_circ_0017769	1	244418759	244420296	-	1537	280	ENSG00000035687;	exon:244418760-244418914,exon:244420170-244420296	ADSS	Adenylosuccinate synthase, GTP-binding site||Adenylosuccinate synthetase, domain 3||Adenylosuccinate synthase, active site||Adenylosuccinate synthetase||P-loop containing nucleoside triphosphate hydrolase||Adenylosuccinate synthetase, domain 2||Adenylosuccinate synthetase isozyme 2, chordates||Adenylosuccinate synthetase, domain 1
hsa_circ_0034869	15	42810613	42872758	-	62145	753	ENSG00000128881;	exon:42810614-42810739,exon:42817032-42817097,exon:42872611-42872758	TTBK2	Protein kinase, ATP binding site||-||Intermediate filament, rod domain||Keratin type II head||Intermediate filament protein, conserved site||Protein kinase domain||Protein kinase-like domain superfamily||Keratin, type II
hsa_circ_0034866	15	42794643	42830078	-	35435	689	ENSG00000128881;	exon:42794644-42794801,exon:42829938-42830078	TTBK2	Protein kinase, ATP binding site||-||Intermediate filament, rod domain||Keratin type II head||Intermediate filament protein, conserved site||Protein kinase domain||Protein kinase-like domain superfamily||Keratin, type II
hsa_circ_0034867	15	42794643	42840433	-	45790	763	ENSG00000128881;	exon:42794644-42794801,exon:42829938-42830078,exon:42840360-42840433	TTBK2	Protein kinase, ATP binding site||-||Intermediate filament, rod domain||Keratin type II head||Intermediate filament protein, conserved site||Protein kinase domain||Protein kinase-like domain superfamily||Keratin, type II
hsa_circ_0034863	15	42775134	42840433	-	65299	1781	ENSG00000128881;	exon:42829938-42830078,exon:42840360-42840433	TTBK2	Protein kinase, ATP binding site||-||Intermediate filament, rod domain||Keratin type II head||Intermediate filament protein, conserved site||Protein kinase domain||Protein kinase-like domain superfamily||Keratin, type II
novel_circ_0019655	20	34413741	34462221	+	48480	418	ENSG00000078747;	exon:34413742-34413879,exon:34449411-34449480,exon:34457390-34457474,exon:34462093-34462221	ITCH	WW domain||C2 domain superfamily||E3 ubiquitin-protein ligase, SMURF1 type||HECT, E3 ligase catalytic domain||HECT domain||-||WW domain superfamily||C2 domain
novel_circ_0019650	20	34413741	34415199	+	1458	137	ENSG00000078747;	intron:34413742-34413879	ITCH	WW domain||C2 domain superfamily||E3 ubiquitin-protein ligase, SMURF1 type||HECT, E3 ligase catalytic domain||HECT domain||-||WW domain superfamily||C2 domain
novel_circ_0019651	20	34413741	34430337	+	16596	286	ENSG00000078747;	intron:34413742-34413879,intron:34430188-34430337	ITCH	WW domain||C2 domain superfamily||E3 ubiquitin-protein ligase, SMURF1 type||HECT, E3 ligase catalytic domain||HECT domain||-||WW domain superfamily||C2 domain
novel_circ_0019652	20	34413741	34438631	+	24890	339	ENSG00000078747;	exon:34413742-34413879,exon:34424480-34424525,exon:34438474-34438631	ITCH	WW domain||C2 domain superfamily||E3 ubiquitin-protein ligase, SMURF1 type||HECT, E3 ligase catalytic domain||HECT domain||-||WW domain superfamily||C2 domain
novel_circ_0019653	20	34413741	34442303	+	28562	277	ENSG00000078747;	exon:34413742-34413879,exon:34424480-34424525,exon:34442208-34442303	ITCH	WW domain||C2 domain superfamily||E3 ubiquitin-protein ligase, SMURF1 type||HECT, E3 ligase catalytic domain||HECT domain||-||WW domain superfamily||C2 domain
novel_circ_0014222	18	6824761	6837414	+	12653	419	ENSG00000088756;	exon:6824762-6824964,exon:6837197-6837414	ARHGAP28	Rho GTPase activation protein||-||Rho GTPase-activating protein domain
novel_circ_0014223	18	6824761	6851126	+	26365	92	ENSG00000088756;	exon:6851034-6851126	ARHGAP28	Rho GTPase activation protein||-||Rho GTPase-activating protein domain
hsa_circ_0074994	5	171199669	171221840	+	22171	384	ENSG00000204764;	exon:171199670-171199773,exon:171205524-171205612,exon:171213631-171213738,exon:171221758-171221840	RANBP17	Armadillo-type fold||Armadillo-like helical||Importin-beta, N-terminal domain||-
novel_circ_0000466	10	124942456	124981829	+	39373	120	ENSG00000019995;	exon:124981709-124981829	ZRANB1	Zinc finger, RanBP2-type superfamily||Ankyrin ubiquitin-binding domain||OTU domain||Zinc finger, RanBP2-type
hsa_circ_0074993	5	171199669	171213738	+	14069	301	ENSG00000204764;	exon:171199670-171199773,exon:171205524-171205612,exon:171213631-171213738	RANBP17	Armadillo-type fold||Armadillo-like helical||Importin-beta, N-terminal domain||-
novel_circ_0014225	18	685920	694334	-	8414	399	ENSG00000132199;	exon:685921-686008,exon:688574-688608,exon:690549-690631,exon:691068-691106,exon:691204-691276,exon:694248-694334	ENOSF1	Enolase-like, C-terminal domain superfamily||Mandelate racemase/muconate lactonizing enzyme, conserved site||Mandelate racemase/muconate lactonizing enzyme, N-terminal domain||-||Enolase-like, N-terminal||Mandelate racemase/muconate lactonizing enzyme, C-terminal||L-fuconate dehydratase||Enolase C-terminal domain-like
novel_circ_0011081	16	49789486	49805769	-	16283	311	ENSG00000102935;	intron:49789487-49789546,intron:49805306-49805373,intron:49805584-49805769	ZNF423	Zinc finger C2H2 superfamily||-||Zinc finger C2H2-type
novel_circ_0011082	16	49789486	49827083	-	37597	59	ENSG00000102935;	intron:49789487-49789546	ZNF423	Zinc finger C2H2 superfamily||-||Zinc finger C2H2-type
novel_circ_0011085	16	49822669	49827083	-	4414	388	ENSG00000102935;	intron:49822670-49822738,intron:49826763-49827083	ZNF423	Zinc finger C2H2 superfamily||-||Zinc finger C2H2-type
novel_circ_0011087	16	4996347	5003573	+	7226	112	ENSG00000103184;	exon:4996348-4996460	SEC14L5	PRELI/MSF1 domain||GOLD domain||CRAL-TRIO lipid binding domain||GOLD domain superfamily||CRAL/TRIO, N-terminal domain superfamily||CRAL-TRIO lipid binding domain superfamily||CRAL/TRIO, N-terminal domain
novel_circ_0038968	9	34096715	34098517	-	1802	258	ENSG00000198876;	exon:34096716-34096781,exon:34098324-34098517	DCAF12	WD40 repeat, conserved site||WD40/YVTN repeat-like-containing domain superfamily||WD40-repeat-containing domain superfamily||WD40 repeat||WD40-repeat-containing domain
novel_circ_0011089	16	50075570	50079018	+	3448	277	ENSG00000155393;	exon:50078741-50079018	HEATR3	Armadillo-type fold||Armadillo-like helical
novel_circ_0038962	9	33986759	33989126	-	2367	230	ENSG00000137073;	exon:33986760-33986837,exon:33988973-33989126	UBAP2	Ubiquitin-associated domain||-||UBA-like superfamily||UBAP2/protein lingerer
novel_circ_0012689	17	50385117	50388132	-	3015	245	ENSG00000108829;	exon:50385118-50385291,exon:50388060-50388132	LRRC59	-||Leucine-rich repeat domain superfamily||Leucine-rich repeat||Leucine-rich repeat, typical subtype
novel_circ_0012683	17	5006914	5014837	+	7923	248	ENSG00000129250;	exon:5007467-5007542,exon:5013653-5013732,exon:5014743-5014837	KIF1C	Forkhead-associated (FHA) domain||P-loop containing nucleoside triphosphate hydrolase||Kinesin motor domain||Kinesin-like protein||SMAD/FHA domain superfamily||Kinesin motor domain, conserved site||Kinesin motor domain superfamily||Kinesin-associated
hsa_circ_0007493	2	61278164	61281242	-	3078	435	ENSG00000115464;	exon:61278165-61278285,exon:61278388-61278443,exon:61280244-61280348,exon:61281090-61281242	USP34	Papain-like cysteine peptidase superfamily||Peptidase C19, ubiquitin carboxyl-terminal hydrolase||-||Armadillo-type fold||Ubiquitin specific protease, conserved site||Ubiquitin specific protease domain
novel_circ_0012686	17	50167946	50168572	+	626	270	ENSG00000108823;	exon:50167947-50168019,exon:50168374-50168572	SGCA	-||Cadherin-like superfamily||Dystroglycan-type cadherin-like||Alpha-sarcoglycan||Sarcoglycan alpha/epsilon
hsa_circ_0007494	2	11286538	11288449	-	1911	896	ENSG00000134318;	intron:11286539-11286639,intron:11287655-11287736,intron:11288350-11288449	ROCK2	Rho binding domain||Rho-associated protein kinase 2, HR1 domain||Protein kinase, ATP binding site||PH-like domain superfamily||-||Serine/threonine-protein kinase, active site||Rho-associated protein kinase 1/2||Protein kinase C-like, phorbol ester/diacylglycerol-binding domain||Rho-associated protein kinase LET-502||Pleckstrin homology domain||AGC-kinase, C-terminal||Protein kinase domain||Protei…
hsa_circ_0007497	14	21371873	21373430	-	1557	264	ENSG00000092201;	exon:21371874-21372044,exon:21373338-21373430	SUPT16H	-||Creatinase/Aminopeptidase P/Spt16, N-terminal||Domain of unknown function DUF1747||Creatinase/aminopeptidase-like||FACT complex subunit Spt16, peptidase M24-like domain||PH-like domain superfamily||Peptidase M24||FACT complex subunit Spt16 domain||FACT complex subunit Spt16||FACT complex subunit Spt16, N-terminal lobe domain
novel_circ_0010932	16	31219094	31219519	+	425	325	ENSG00000177238;	exon:31219095-31219190,exon:31219289-31219519	TRIM72	SPRY domain||Tripartite motif-containing protein 72||B-box-type zinc finger||B30.2/SPRY domain||RING-type zinc-finger, LisH dimerisation motif||Zinc finger, RING/FYVE/PHD-type||Zinc finger, RING-type||Zinc finger, RING-type, conserved site||Butyrophylin-like, SPRY domain||SPRY-associated||Concanavalin A-like lectin/glucanase domain superfamily
novel_circ_0010931	16	31120185	31120514	+	329	249	ENSG00000103510;	exon:31120186-31120260,exon:31120339-31120514	KAT8	Histone acetyltransferase KAT8||Winged helix-like DNA-binding domain superfamily||Chromo-like domain superfamily||Histone acetyltransferase domain, MYST-type||MYST, zinc finger domain||RNA binding activity-knot of a chromodomain||Chromo/chromo shadow domain||Acyl-CoA N-acyltransferase||-
novel_circ_0010937	16	31361062	31363374	+	2312	150	ENSG00000140678;	exon:31361063-31361213	ITGAX	Integrin alpha chain, C-terminal cytoplasmic region, conserved site||von Willebrand factor A-like domain superfamily||Integrin alpha, N-terminal||FG-GAP repeat||Integrin alpha-2||Integrin domain superfamily||von Willebrand factor, type A||Integrin alpha beta-propellor||Integrin alpha chain
novel_circ_0010935	16	3129247	3129653	-	406	405	ENSG00000263072;	exon:3129248-3129653	--	-
novel_circ_0011338	16	69160355	69168998	+	8643	378	ENSG00000141076;	exon:69160356-69160462,exon:69163083-69163178,exon:69168821-69168998	UTP4	WD40/YVTN repeat-like-containing domain superfamily||Anaphase-promoting complex subunit 4, WD40 domain||WD40 repeat||Quinoprotein alcohol dehydrogenase-like superfamily||WD40-repeat-containing domain superfamily||WD40-repeat-containing domain
hsa_circ_0000641	15	77052384	77056255	-	3871	606	ENSG00000140391;	exon:77052385-77052468	TSPAN3	Tetraspanin, EC2 domain superfamily||-||Tetraspanin/Peripherin||Tetraspanin, conserved site||Tetraspanin
hsa_circ_0000640	15	76728594	76733384	-	4790	299	ENSG00000140386;	exon:76728595-76728737,exon:76733229-76733384	SCAPER	-||Matrin/U1-C-like, C2H2-type zinc finger||S phase cyclin A-associated protein in the endoplasmic reticulum, N-terminal||Zinc finger C2H2 superfamily
hsa_circ_0000643	15	80120327	80122800	+	2473	381	ENSG00000086666;	exon:80120328-80120498,exon:80121712-80121820,exon:80122700-80122800	ZFAND6	AN1-like Zinc finger||-||Zinc finger, AN1-type||Zinc finger, A20-type
hsa_circ_0000642	15	80098415	80122800	+	24385	544	ENSG00000086666;	exon:80098416-80098578,exon:80120328-80120498,exon:80121712-80121820,exon:80122700-80122800	ZFAND6	AN1-like Zinc finger||-||Zinc finger, AN1-type||Zinc finger, A20-type
hsa_circ_0000645	15	80978930	80982182	-	3252	780	ENSG00000117899;	exon:80978931-80979477,exon:80981950-80982182	MESD	LRP chaperone MESD||-
hsa_circ_0000647	15	84680712	84691644	-	10932	380	ENSG00000140612;	exon:84680713-84680832,exon:84691535-84691644	SEC11A	Peptidase S26B||Peptidase S26A, signal peptidase I, serine active site||Signal peptidase complex catalytic subunit SEC11A||Peptidase S26A, signal peptidase I, conserved site||-||Peptidase S24/S26A/S26B/S26C||LexA/Signal peptidase-like superfamily
hsa_circ_0000646	15	83151214	83164075	-	12861	522	ENSG00000166503;	exon:83151215-83151361,exon:83157415-83157573,exon:83157903-83158041,exon:83163999-83164075	HDGFL3	HDGF-related, PWWP domain||PWWP domain||-
hsa_circ_0007149	4	1228198	1241519	-	13321	495	ENSG00000159692;	exon:1228199-1228343,exon:1241325-1241519	CTBP1	D-isomer specific 2-hydroxyacid dehydrogenase, catalytic domain||-||NAD(P)-binding domain superfamily||D-isomer specific 2-hydroxyacid dehydrogenase, NAD-binding domain conserved site||D-isomer specific 2-hydroxyacid dehydrogenase, NAD-binding domain conserved site 1||D-isomer specific 2-hydroxyacid dehydrogenase, NAD-binding domain
hsa_circ_0007147	3	33411580	33425741	-	14161	442	ENSG00000153560;	exon:33411581-33411687,exon:33412722-33412827,exon:33416758-33416834,exon:33425590-33425741	UBP1	-||CP2 transcription factor||Upstream-binding protein 1, SAM domain||SAM domain||Sterile alpha motif/pointed domain superfamily||Transcription factor CP2-like
hsa_circ_0007146	16	5027134	5028185	-	1051	420	ENSG00000103174;	exon:5027135-5027198,exon:5027278-5027379	NAGPA	-||EGF-like domain||Phosphodiester glycosidase||EGF-like, conserved site
hsa_circ_0007145	7	45063917	45064646	+	729	268	ENSG00000136280;	exon:45063918-45064001,exon:45064463-45064646	CCM2	Cerebral cavernous malformations 2||PTB/PI domain||-||PH-like domain superfamily||Cerebral cavernous malformations 2, harmonin-homology domain
hsa_circ_0007142	10	126970701	126990603	+	19902	427	ENSG00000150760;	exon:126970702-126970785,exon:126977948-126977988,exon:126981918-126981973,exon:126987521-126987617,exon:126990455-126990603	DOCK1	C2 domain superfamily||Dedicator of cytokinesis||DHR-1 domain||SH3-like domain superfamily||Dedicator of cytokinesis, N-terminal domain||Dedicator of cytokinesis, C-terminal||Dedicator of cytokinesis protein 1/5||DHR-2 domain||Armadillo-type fold||SH3 domain
hsa_circ_0007141	20	48941198	48953790	+	12592	717	ENSG00000124198;	exon:48941199-48941229,exon:48941864-48941987,exon:48953556-48953790	ARFGEF2	Sec7 domain superfamily||Mon2, dimerisation and cyclophilin-binding domain||Armadillo-type fold||Guanine nucleotide exchange factor, N-terminal||Sec7, C-terminal domain superfamily||Sec7, C-terminal||Sec7 domain
hsa_circ_0007140	7	6697338	6705223	-	7885	288	ENSG00000164631;	exon:6697339-6697434,exon:6697685-6697811,exon:6705159-6705223	ZNF12	Zinc finger C2H2-type||Krueppel-associated box||KRAB domain superfamily||Zinc finger C2H2 superfamily
novel_circ_0032935	6	152236106	152256765	-	20659	327	ENSG00000131018;	exon:152236107-152236303,exon:152236817-152236948	SYNE1	KASH domain||Actinin-type actin-binding domain, conserved site||Spectrin repeat||-||CH domain superfamily||Nesprin-1||Calponin homology domain||Spectrin/alpha-actinin
hsa_circ_0031568	14	31364188	31387375	-	23187	1138	ENSG00000129493;ENSG00000203546;	exon:31364189-31364298,exon:31387120-31387375	HEATR5A;AL139353.1	-
hsa_circ_0031569	14	31371809	31374968	-	3159	253	ENSG00000129493;ENSG00000203546;	exon:31371810-31371909,exon:31374816-31374968	HEATR5A;AL139353.1	-
novel_circ_0032932	6	152233780	152239706	-	5926	173	ENSG00000131018;	exon:152239533-152239706	SYNE1	KASH domain||Actinin-type actin-binding domain, conserved site||Spectrin repeat||-||CH domain superfamily||Nesprin-1||Calponin homology domain||Spectrin/alpha-actinin
hsa_circ_0031560	14	31347747	31374968	-	27221	1160	ENSG00000203546;ENSG00000129493;	exon:31371810-31371909,exon:31374816-31374968	AL139353.1;HEATR5A	-
hsa_circ_0031563	14	31349788	31364298	-	14510	747	ENSG00000203546;ENSG00000129493;	exon:31364189-31364298	AL139353.1;HEATR5A	-
novel_circ_0006253	13	19751270	19759418	-	8148	291	ENSG00000121390;	exon:19751271-19751467,exon:19759323-19759418	PSPC1	-||PSP1, RNA recognition motif 1||NOPS||PSP1, RNA recognition motif 2||RNA recognition motif domain||Nucleotide-binding alpha-beta plait domain superfamily||RNA-binding domain superfamily
novel_circ_0031370	5	42804655	42808366	-	3711	332	ENSG00000250722;	exon:42804656-42804773,exon:42808151-42808366	SELENOP	Selenoprotein P, C-terminal||Selenoprotein P, N-terminal||Selenoprotein P
novel_circ_0013799	18	2795948	2796521	+	573	272	ENSG00000101596;	exon:2795949-2796107,exon:2796407-2796521	SMCHD1	SMCs flexible hinge||Histidine kinase/HSP90-like ATPase||SMCs flexible hinge superfamily||Structural maintenance of chromosomes flexible hinge domain-containing protein 1||-||Histidine kinase/HSP90-like ATPase superfamily
novel_circ_0013798	18	2777805	2784621	+	6816	350	ENSG00000101596;	exon:2777806-2777915,exon:2778169-2778239,exon:2784450-2784621	SMCHD1	SMCs flexible hinge||Histidine kinase/HSP90-like ATPase||SMCs flexible hinge superfamily||Structural maintenance of chromosomes flexible hinge domain-containing protein 1||-||Histidine kinase/HSP90-like ATPase superfamily
novel_circ_0004083	12	108652241	108654410	-	2169	422	ENSG00000110880;	exon:108652242-108652417,exon:108653038-108653181,exon:108654306-108654410	CORO1C	Coronin||WD40/YVTN repeat-like-containing domain superfamily||Domain of unknown function DUF1899||WD40-repeat-containing domain superfamily||WD40 repeat, conserved site||-||Coronin 1C||WD40-repeat-containing domain||WD40 repeat
hsa_circ_0082304	7	129657342	129671543	+	14201	347	ENSG00000106459;	exon:129657343-129657574,exon:129671429-129671543	NRF1	NRF1/Ewg family||Nuclear respiratory factor-1, activation binding domain||Nuclear respiratory factor 1, NLS/DNA-binding, dimerisation domain
novel_circ_0004081	12	108543027	108549214	-	6187	354	ENSG00000075856;	exon:108543028-108543152,exon:108547887-108547991,exon:108549088-108549214	SART3	SART3, RNA recognition motif 2||LSM-interacting domain||Nucleotide-binding alpha-beta plait domain superfamily||RNA recognition motif domain||SART3, RNA recognition motif 1||-||HAT (Half-A-TPR) repeat||Tetratricopeptide-like helical domain superfamily||RNA-binding domain superfamily
novel_circ_0013793	18	2769693	2784621	+	14928	245	ENSG00000101596;	exon:2769694-2769820,exon:2769989-2770108	SMCHD1	SMCs flexible hinge||Histidine kinase/HSP90-like ATPase||SMCs flexible hinge superfamily||Structural maintenance of chromosomes flexible hinge domain-containing protein 1||-||Histidine kinase/HSP90-like ATPase superfamily
novel_circ_0013792	18	2769693	2772372	+	2679	248	ENSG00000101596;	exon:2769694-2769820,exon:2772250-2772372	SMCHD1	SMCs flexible hinge||Histidine kinase/HSP90-like ATPase||SMCs flexible hinge superfamily||Structural maintenance of chromosomes flexible hinge domain-containing protein 1||-||Histidine kinase/HSP90-like ATPase superfamily
novel_circ_0013790	18	2762104	2770108	+	8004	250	ENSG00000101596;	exon:2762105-2762236,exon:2769989-2770108	SMCHD1	SMCs flexible hinge||Histidine kinase/HSP90-like ATPase||SMCs flexible hinge superfamily||Structural maintenance of chromosomes flexible hinge domain-containing protein 1||-||Histidine kinase/HSP90-like ATPase superfamily
novel_circ_0013797	18	2777805	2778239	+	434	433	ENSG00000101596;	exon:2777806-2778239	SMCHD1	SMCs flexible hinge||Histidine kinase/HSP90-like ATPase||SMCs flexible hinge superfamily||Structural maintenance of chromosomes flexible hinge domain-containing protein 1||-||Histidine kinase/HSP90-like ATPase superfamily
novel_circ_0013796	18	2775733	2784621	+	8888	361	ENSG00000101596;	exon:2775734-2775924,exon:2784450-2784621	SMCHD1	SMCs flexible hinge||Histidine kinase/HSP90-like ATPase||SMCs flexible hinge superfamily||Structural maintenance of chromosomes flexible hinge domain-containing protein 1||-||Histidine kinase/HSP90-like ATPase superfamily
novel_circ_0013795	18	2775733	2778239	+	2506	260	ENSG00000101596;	exon:2775734-2775924,exon:2778169-2778239	SMCHD1	SMCs flexible hinge||Histidine kinase/HSP90-like ATPase||SMCs flexible hinge superfamily||Structural maintenance of chromosomes flexible hinge domain-containing protein 1||-||Histidine kinase/HSP90-like ATPase superfamily
novel_circ_0013794	18	2772249	2777915	+	5666	231	ENSG00000101596;	exon:2772250-2772372,exon:2777806-2777915	SMCHD1	SMCs flexible hinge||Histidine kinase/HSP90-like ATPase||SMCs flexible hinge superfamily||Structural maintenance of chromosomes flexible hinge domain-containing protein 1||-||Histidine kinase/HSP90-like ATPase superfamily
hsa_circ_0008344	9	33935838	33941862	-	6024	254	ENSG00000137073;	exon:33935839-33935878,exon:33941649-33941862	UBAP2	Ubiquitin-associated domain||-||UBA-like superfamily||UBAP2/protein lingerer
hsa_circ_0008345	8	140818276	140864399	-	46123	505	ENSG00000169398;	exon:140818277-140818354,exon:140818880-140819020,exon:140846260-140846322,exon:140846599-140846678,exon:140864312-140864399	PTK2	FERM/acyl-CoA-binding protein superfamily||FAK1/PYK2, FERM domain C-lobe||Focal adhesion kinase, N-terminal||Protein kinase-like domain superfamily||Ubiquitin-like domain superfamily||Protein kinase, ATP binding site||Tyrosine-protein kinase, active site||PH-like domain superfamily||FERM central domain||-||Focal adhesion kinase, targeting (FAT) domain superfamily||Tyrosine-protein kinase, catalyt…
hsa_circ_0008346	15	41356038	41377304	+	21266	784	ENSG00000285920;ENSG00000137804;	exon:41356039-41356140,exon:41358149-41358258,exon:41371527-41371684,exon:41375712-41375828,exon:41377196-41377304	AC087721.2;NUSAP1	-
hsa_circ_0008341	4	82827368	82829058	-	1690	323	ENSG00000138674;	exon:82827369-82827632,exon:82829000-82829058	SEC31A	Ancestral coatomer element 1, Sec16/Sec31||WD40-repeat-containing domain superfamily||Protein transport protein SEC31-like||WD40-repeat-containing domain||WD40 repeat||-||WD40/YVTN repeat-like-containing domain superfamily
hsa_circ_0008342	11	77619605	77629899	-	10294	611	ENSG00000074201;	exon:77619606-77619695,exon:77622500-77622673,exon:77625717-77625818,exon:77629763-77629899	CLNS1A	ICln||-||ICln/Lot5||PH-like domain superfamily
hsa_circ_0008343	3	48979481	48980496	+	1015	296	ENSG00000177479;	exon:48979482-48979633,exon:48980353-48980496	ARIH2	E3 ubiquitin ligase RBR family||Zinc finger, RING-type||IBR domain||-||Zinc finger, RING-type, conserved site||Zinc finger, RING/FYVE/PHD-type||E3 ubiquitin-protein ligase ARIH2
novel_circ_0013249	17	75610165	75612016	+	1851	339	ENSG00000266714;	exon:75610166-75610259,exon:75610900-75610959,exon:75611601-75611658,exon:75611886-75612016	MYO15B	FERM domain||SH3-like domain superfamily||MyTH4 domain superfamily||Myosin head, motor domain||Band 4.1 domain||Myosin-XV, FERM domain C-lobe||SH3 domain||IQ motif, EF-hand binding site||Kinesin motor domain superfamily||FERM superfamily, second domain||MYO15B, SH3 domain||MyTH4 domain||P-loop containing nucleoside triphosphate hydrolase||-||PH-like domain superfamily||FERM central domain
novel_circ_0001569	10	72859176	72868863	+	9687	264	ENSG00000156026;	exon:72860423-72860527,exon:72868703-72868863	MCU	-||Calcium uniporter protein, C-terminal||MCU family
novel_circ_0013245	17	75538530	75543501	+	4971	209	ENSG00000073350;	exon:75538531-75538636,exon:75543397-75543501	LLGL2	WD40 repeat||WD40-repeat-containing domain||Lethal giant larvae homologue 2||WD40 repeat, conserved site||-||WD40-repeat-containing domain superfamily||Lethal(2) giant larvae protein||WD40/YVTN repeat-like-containing domain superfamily
novel_circ_0013247	17	75605503	75606021	+	518	274	ENSG00000266714;	exon:75605504-75605621,exon:75605864-75606021	MYO15B	FERM domain||SH3-like domain superfamily||MyTH4 domain superfamily||Myosin head, motor domain||Band 4.1 domain||Myosin-XV, FERM domain C-lobe||SH3 domain||IQ motif, EF-hand binding site||Kinesin motor domain superfamily||FERM superfamily, second domain||MYO15B, SH3 domain||MyTH4 domain||P-loop containing nucleoside triphosphate hydrolase||-||PH-like domain superfamily||FERM central domain
novel_circ_0013246	17	75563015	75564507	+	1492	370	ENSG00000073350;	exon:75563016-75563178,exon:75563752-75563806,exon:75564353-75564507	LLGL2	WD40 repeat||WD40-repeat-containing domain||Lethal giant larvae homologue 2||WD40 repeat, conserved site||-||WD40-repeat-containing domain superfamily||Lethal(2) giant larvae protein||WD40/YVTN repeat-like-containing domain superfamily
novel_circ_0013241	17	75277352	75283593	-	6241	130	ENSG00000125454;	exon:75277353-75277483	SLC25A19	-||Mitochondrial carrier protein||Mitochondrial carrier domain superfamily||Mitochondrial substrate/solute carrier
novel_circ_0001562	10	72715110	72742273	+	27163	372	ENSG00000156026;	intron:72715111-72715226,intron:72715854-72715902,intron:72741722-72741845,intron:72742187-72742273	MCU	-||Calcium uniporter protein, C-terminal||MCU family
novel_circ_0013242	17	75485427	75486426	+	999	246	ENSG00000177728;	exon:75485428-75485547,exon:75485871-75485998	TMEM94	P-type ATPase, transmembrane domain superfamily||Transmembrane protein 94||-||Cation-transporting P-type ATPase, C-terminal
novel_circ_0012750	17	5335183	5350629	+	15446	338	ENSG00000029725;	exon:5335184-5335344,exon:5350451-5350629	RABEP1	Rabaptin, GTPase-Rab5 binding domain||Rabaptin-5||Rabaptin coiled-coil domain||Rabaptin
novel_circ_0012751	17	5338018	5346925	+	8907	254	ENSG00000029725;	exon:5338019-5338138,exon:5346790-5346925	RABEP1	Rabaptin, GTPase-Rab5 binding domain||Rabaptin-5||Rabaptin coiled-coil domain||Rabaptin
novel_circ_0012755	17	5346789	5354490	+	7701	266	ENSG00000029725;	exon:5346790-5346925,exon:5354359-5354490	RABEP1	Rabaptin, GTPase-Rab5 binding domain||Rabaptin-5||Rabaptin coiled-coil domain||Rabaptin
novel_circ_0012757	17	5354358	5363016	+	8658	235	ENSG00000029725;	exon:5354359-5354490,exon:5362912-5363016	RABEP1	Rabaptin, GTPase-Rab5 binding domain||Rabaptin-5||Rabaptin coiled-coil domain||Rabaptin
novel_circ_0012759	17	5354358	5368468	+	14110	229	ENSG00000029725;	exon:5354359-5354490,exon:5368370-5368468	RABEP1	Rabaptin, GTPase-Rab5 binding domain||Rabaptin-5||Rabaptin coiled-coil domain||Rabaptin
hsa_circ_0068100	3	179601729	179602797	-	1068	207	ENSG00000136522;	exon:179601730-179601790,exon:179602652-179602797	MRPL47	MRP-L47 superfamily, mitochondrial||Ribosomal protein L47, mitochondrial
hsa_circ_0068103	3	179681877	179708957	+	27080	637	ENSG00000058056;	exon:179681878-179682003,exon:179690241-179690301,exon:179708773-179708957	USP13	Ubiquitinyl hydrolase, variant UBP zinc finger||Ubiquitin specific protease domain||Ubiquitin specific protease, conserved site||Peptidase C19, ubiquitin carboxyl-terminal hydrolase||Papain-like cysteine peptidase superfamily||UBA-like superfamily||-||Zinc finger, RING/FYVE/PHD-type||Ubiquitinyl hydrolase||Zinc finger, UBP-type||Ubiquitin-associated domain
hsa_circ_0063682	22	43059383	43075590	-	16207	999	ENSG00000100271;	exon:43059384-43059527,exon:43063813-43063921	TTLL1	Tubulin-tyrosine ligase/Tubulin polyglutamylase||-||Tubulin polyglutamylase TTLL1||ATP-grasp fold, subdomain 1
novel_circ_0002035	10	96559658	96576829	-	17171	77	ENSG00000077147;	exon:96559659-96559736	TM9SF3	Nonaspanin (TM9SF)
hsa_circ_0063681	22	43059383	43064324	-	4941	388	ENSG00000100271;	exon:43059384-43059527,exon:43063813-43063921,exon:43064190-43064324	TTLL1	Tubulin-tyrosine ligase/Tubulin polyglutamylase||-||Tubulin polyglutamylase TTLL1||ATP-grasp fold, subdomain 1
novel_circ_0002032	10	96544075	96576829	-	32754	419	ENSG00000077147;	exon:96544076-96544206,exon:96547895-96547989,exon:96576634-96576829	TM9SF3	Nonaspanin (TM9SF)
novel_circ_0009916	15	75913202	75917394	+	4192	346	ENSG00000167196;	exon:75913203-75913290,exon:75914110-75914205,exon:75917230-75917394	FBXO22	-||F-box-like domain superfamily||FIST, C-domain||F-box domain
hsa_circ_0065100	3	45721999	45732151	+	10152	421	ENSG00000211456;	exon:45723475-45723543	SACM1L	SAC domain||-
novel_circ_0000766	10	26066974	26096682	+	29708	311	ENSG00000095777;	exon:26066975-26067074,exon:26096381-26096479,exon:26096568-26096682	MYO3A	Protein kinase-like domain superfamily||Protein kinase domain||Myosin head, motor domain||Class III myosin, motor domain||-||Kinesin motor domain superfamily||IQ motif, EF-hand binding site||Protein kinase, ATP binding site||P-loop containing nucleoside triphosphate hydrolase
novel_circ_0000767	10	26088202	26096682	+	8480	414	ENSG00000095777;	exon:26088203-26088405,exon:26096381-26096479,exon:26096568-26096682	MYO3A	Protein kinase-like domain superfamily||Protein kinase domain||Myosin head, motor domain||Class III myosin, motor domain||-||Kinesin motor domain superfamily||IQ motif, EF-hand binding site||Protein kinase, ATP binding site||P-loop containing nucleoside triphosphate hydrolase
hsa_circ_0079733	7	30778431	30782212	+	3781	356	ENSG00000106125;ENSG00000254959;	exon:30778432-30778551,exon:30781977-30782212	MINDY4;INMT-MINDY4	-
novel_circ_0000765	10	26066974	26070401	+	3427	402	ENSG00000095777;	exon:26066975-26067074,exon:26068768-26068884,exon:26070111-26070215,exon:26070318-26070401	MYO3A	Protein kinase-like domain superfamily||Protein kinase domain||Myosin head, motor domain||Class III myosin, motor domain||-||Kinesin motor domain superfamily||IQ motif, EF-hand binding site||Protein kinase, ATP binding site||P-loop containing nucleoside triphosphate hydrolase
novel_circ_0000763	10	25996489	26024087	+	27598	169	ENSG00000095777;	exon:25996490-25996594,exon:26024022-26024087	MYO3A	Protein kinase-like domain superfamily||Protein kinase domain||Myosin head, motor domain||Class III myosin, motor domain||-||Kinesin motor domain superfamily||IQ motif, EF-hand binding site||Protein kinase, ATP binding site||P-loop containing nucleoside triphosphate hydrolase
novel_circ_0000760	10	24961805	24970194	+	8389	69	ENSG00000285859;	intron:24961806-24961875	--	-
novel_circ_0000761	10	25952093	25955008	+	2915	318	ENSG00000095777;	exon:25952094-25952278,exon:25954874-25955008	MYO3A	Protein kinase-like domain superfamily||Protein kinase domain||Myosin head, motor domain||Class III myosin, motor domain||-||Kinesin motor domain superfamily||IQ motif, EF-hand binding site||Protein kinase, ATP binding site||P-loop containing nucleoside triphosphate hydrolase
hsa_circ_0079739	7	30836657	30840848	+	4191	313	ENSG00000106125;ENSG00000254959;	exon:30836658-30836764,exon:30840760-30840848	MINDY4;INMT-MINDY4	-
novel_circ_0000769	10	26125397	26147559	+	22162	339	ENSG00000095777;	exon:26125398-26125608,exon:26147430-26147559	MYO3A	Protein kinase-like domain superfamily||Protein kinase domain||Myosin head, motor domain||Class III myosin, motor domain||-||Kinesin motor domain superfamily||IQ motif, EF-hand binding site||Protein kinase, ATP binding site||P-loop containing nucleoside triphosphate hydrolase
novel_circ_0040546	X	7077219	7085471	-	8252	229	ENSG00000130021;	exon:7077220-7077449	PUDP	Haloacid dehalogenase-like hydrolase||HAD-like superfamily||-||Phosphoglycolate phosphatase-like, domain 2||HAD superfamily||HAD hydrolase, subfamily IA
novel_circ_0040540	X	68513326	68521497	+	8171	245	ENSG00000181704;	exon:68513327-68513405,exon:68518770-68518812,exon:68521372-68521497	YIPF6	Yip1 domain
novel_circ_0040548	X	71061027	71068322	-	7295	394	ENSG00000147164;	exon:71061028-71061118,exon:71061843-71061967,exon:71068142-71068322	SNX12	PX domain superfamily||Phox homologous domain
novel_circ_0006648	13	45377139	45392190	+	15051	316	ENSG00000170919;	exon:45377140-45377215,exon:45378530-45378671,exon:45392090-45392190	--	-
novel_circ_0006647	13	45377060	45392190	+	15130	398	ENSG00000170919;	exon:45377061-45377215,exon:45383091-45383235,exon:45392090-45392190	--	-
novel_circ_0006646	13	45283441	45284171	+	730	324	ENSG00000188342;	exon:45283442-45283643,exon:45284048-45284171	GTF2F2	Winged helix DNA-binding domain superfamily||Winged helix-like DNA-binding domain superfamily||Transcription Factor IIF, Rap30/Rap74, interaction||TFIIF, beta subunit, N-terminal||Transcription initiation factor IIF, beta subunit||TFIIF beta subunit, HTH domain
novel_circ_0006643	13	45006201	45028003	+	21802	218	ENSG00000133114;	exon:45027785-45028003	GPALPP1	Protein of unknown function DUF3752||-
novel_circ_0006642	13	45006201	45020428	+	14227	283	ENSG00000133114;	exon:45006202-45006303,exon:45008795-45008879,exon:45020330-45020428	GPALPP1	Protein of unknown function DUF3752||-
novel_circ_0006640	13	45004304	45020428	+	16124	233	ENSG00000133114;	exon:45004305-45004437,exon:45006202-45006303	GPALPP1	Protein of unknown function DUF3752||-
hsa_circ_0029000	12	121743628	121761738	+	18110	482	ENSG00000188735;	exon:121743629-121743747,exon:121748326-121748442,exon:121750380-121750439,exon:121752128-121752223,exon:121761649-121761738	TMEM120B	TMPIT-like||-
novel_circ_0030743	5	146160373	146171990	-	11617	329	ENSG00000133706;	exon:146160374-146160486,exon:146168128-146168265,exon:146171910-146171990	LARS	Methionyl/Leucyl tRNA synthetase||Leucyl-tRNA synthetase, class Ia, archaeal/eukaryotic cytosolic||Aminoacyl-tRNA synthetase, class Ia, anticodon-binding||Rossmann-like alpha/beta/alpha sandwich fold||Valyl/Leucyl/Isoleucyl-tRNA synthetase, editing domain||Aminoacyl-tRNA synthetase, class I, conserved site||Aminoacyl-tRNA synthetase, class Ia||Methionyl/Valyl/Leucyl/Isoleucyl-tRNA synthetase, ant…
novel_circ_0030740	5	146149621	146164471	-	14850	350	ENSG00000133706;	exon:146149622-146149699,exon:146160374-146160486,exon:146164310-146164471	LARS	Methionyl/Leucyl tRNA synthetase||Leucyl-tRNA synthetase, class Ia, archaeal/eukaryotic cytosolic||Aminoacyl-tRNA synthetase, class Ia, anticodon-binding||Rossmann-like alpha/beta/alpha sandwich fold||Valyl/Leucyl/Isoleucyl-tRNA synthetase, editing domain||Aminoacyl-tRNA synthetase, class I, conserved site||Aminoacyl-tRNA synthetase, class Ia||Methionyl/Valyl/Leucyl/Isoleucyl-tRNA synthetase, ant…
novel_circ_0030747	5	146218984	146223527	+	4543	242	ENSG00000091009;ENSG00000275740;	exon:146218985-146219103,exon:146223403-146223527	RBM27;AC091959.3	-
novel_circ_0004864	12	19590661	19603313	+	12652	461	ENSG00000139154;	intron:19590662-19590799,intron:19595997-19596089,intron:19603081-19603313	AEBP2	Zinc finger C2H2-type||-||Zinc finger C2H2 superfamily
novel_circ_0030745	5	146168127	146172774	-	4647	304	ENSG00000133706;	exon:146168128-146168265,exon:146171910-146171990,exon:146172687-146172774	LARS	Methionyl/Leucyl tRNA synthetase||Leucyl-tRNA synthetase, class Ia, archaeal/eukaryotic cytosolic||Aminoacyl-tRNA synthetase, class Ia, anticodon-binding||Rossmann-like alpha/beta/alpha sandwich fold||Valyl/Leucyl/Isoleucyl-tRNA synthetase, editing domain||Aminoacyl-tRNA synthetase, class I, conserved site||Aminoacyl-tRNA synthetase, class Ia||Methionyl/Valyl/Leucyl/Isoleucyl-tRNA synthetase, ant…
novel_circ_0030749	5	146223402	146230917	+	7515	384	ENSG00000275740;ENSG00000091009;	exon:146223403-146223527,exon:146230657-146230917	AC091959.3;RBM27	-
hsa_circ_0001367	3	183643479	183651276	+	7797	1044	ENSG00000114796;	exon:183643480-183643542	KLHL24	BTB/POZ domain||BTB/Kelch-associated||SKP1/BTB/POZ domain superfamily||BTB-kelch protein||Kelch-like protein 24||Kelch-type beta propeller||Kelch repeat type 1
hsa_circ_0088404	9	122996040	123020459	+	24419	871	ENSG00000011454;	exon:122996041-122996151,exon:122996539-122996605,exon:123015543-123015636,exon:123020309-123020459	RABGAP1	Rab-GTPase-TBC domain||PTB/PI domain||GPCR, rhodopsin-like, 7TM||PH-like domain superfamily||Rab-GTPase-TBC domain superfamily||-||Kinesin-like||G protein-coupled receptor, rhodopsin-like||Rab GTPase-activating protein 1
novel_circ_0025772	3	142664201	142671122	+	6921	397	ENSG00000120756;	exon:142664202-142664307,exon:142669390-142669553,exon:142670993-142671122	PLS1	Actinin-type actin-binding domain, conserved site||EF-hand domain||EF-Hand 1, calcium-binding site||Fimbrin/Plastin||EF-hand domain pair||Calponin homology domain||Plastin-1||CH domain superfamily
novel_circ_0025773	3	142664201	142678113	+	13912	610	ENSG00000120756;	exon:142664202-142664307,exon:142669390-142669553,exon:142670993-142671122,exon:142676157-142676289,exon:142678032-142678113	PLS1	Actinin-type actin-binding domain, conserved site||EF-hand domain||EF-Hand 1, calcium-binding site||Fimbrin/Plastin||EF-hand domain pair||Calponin homology domain||Plastin-1||CH domain superfamily
novel_circ_0025774	3	142669389	142678113	+	8724	81	ENSG00000120756;	exon:142678032-142678113	PLS1	Actinin-type actin-binding domain, conserved site||EF-hand domain||EF-Hand 1, calcium-binding site||Fimbrin/Plastin||EF-hand domain pair||Calponin homology domain||Plastin-1||CH domain superfamily
hsa_circ_0088408	9	123065347	123090385	+	25038	834	ENSG00000011454;	exon:123065348-123065461,exon:123076634-123076762,exon:123090275-123090385	RABGAP1	Rab-GTPase-TBC domain||PTB/PI domain||GPCR, rhodopsin-like, 7TM||PH-like domain superfamily||Rab-GTPase-TBC domain superfamily||-||Kinesin-like||G protein-coupled receptor, rhodopsin-like||Rab GTPase-activating protein 1
novel_circ_0003070	11	47476845	47482856	-	6011	402	ENSG00000149187;	exon:47476846-47476959,exon:47477297-47477425,exon:47482695-47482856	CELF1	RNA recognition motif domain||Paraneoplastic encephalomyelitis antigen||Nucleotide-binding alpha-beta plait domain superfamily||CELF1/2, RNA recognition motif 2||RNA-binding domain superfamily||CELF1/2, RNA recognition motif 1||CELF1/2, RNA recognition motif 3||-
hsa_circ_0005861	11	62839113	62839867	-	754	590	ENSG00000133316;	exon:62839114-62839235	WDR74	WDR74/Nsa1||WD40 repeat||WD40-repeat-containing domain superfamily||-||WD40/YVTN repeat-like-containing domain superfamily
novel_circ_0038516	9	13216773	13223710	-	6937	88	ENSG00000107186;	exon:13216774-13216862	MPDZ	Multiple PDZ domain protein||PDZ domain||-||PDZ superfamily||L27 domain||L27 domain superfamily||L27-2
novel_circ_0038514	9	13188783	13206099	-	17316	183	ENSG00000107186;	exon:13205916-13206099	MPDZ	Multiple PDZ domain protein||PDZ domain||-||PDZ superfamily||L27 domain||L27 domain superfamily||L27-2
novel_circ_0038515	9	13205035	13206099	-	1064	254	ENSG00000107186;	exon:13205036-13205107,exon:13205916-13206099	MPDZ	Multiple PDZ domain protein||PDZ domain||-||PDZ superfamily||L27 domain||L27 domain superfamily||L27-2
novel_circ_0038513	9	13188783	13196230	-	7447	464	ENSG00000107186;	exon:13188784-13188993,exon:13193167-13193313,exon:13196121-13196230	MPDZ	Multiple PDZ domain protein||PDZ domain||-||PDZ superfamily||L27 domain||L27 domain superfamily||L27-2
hsa_circ_0004270	1	108148278	108161293	-	13015	532	ENSG00000085491;	exon:108148279-108148386,exon:108154983-108155135,exon:108157462-108157620,exon:108161182-108161293	SLC25A24	EF-Hand 1, calcium-binding site||Mitochondrial carrier protein||EF-hand domain||Mitochondrial substrate/solute carrier||EF-hand domain pair||Graves disease carrier protein||Mitochondrial carrier domain superfamily||-
hsa_circ_0004272	19	5032865	5047669	+	14804	651	ENSG00000127663;	exon:5032866-5033031	KDM4B	Zinc finger, FYVE/PHD-type||JmjC domain||Extended PHD (ePHD) domain||Lysine-specific demethylase 4, Tudor domain||Tudor domain||Zinc finger, PHD-type||JmjN domain||Zinc finger, RING/FYVE/PHD-type
hsa_circ_0080635	7	75017597	75020149	+	2552	562	ENSG00000274070;	exon:75020039-75020149	CASTOR2	CASTOR1, N-terminal||CASTOR family||CASTOR, ACT domain
hsa_circ_0027363	12	62493914	62501698	+	7784	614	ENSG00000061987;	exon:62493915-62494042,exon:62500783-62500880,exon:62501573-62501698	MON2	-||Mon2, dimerisation and cyclophilin-binding domain||Protein Mon2-like||Mon2, C-terminal||Sec7, C-terminal||Armadillo-type fold||Guanine nucleotide exchange factor, N-terminal
hsa_circ_0027364	12	62498918	62501698	+	2780	354	ENSG00000061987;	exon:62498919-62499048,exon:62500783-62500880,exon:62501573-62501698	MON2	-||Mon2, dimerisation and cyclophilin-binding domain||Protein Mon2-like||Mon2, C-terminal||Sec7, C-terminal||Armadillo-type fold||Guanine nucleotide exchange factor, N-terminal
novel_circ_0026525	3	185494622	185495315	-	693	299	ENSG00000163900;	exon:185494623-185494761,exon:185495154-185495315	TMEM41A	SNARE associated Golgi protein||-
hsa_circ_0004276	3	67495797	67508903	-	13106	402	ENSG00000172340;	exon:67495798-67495940	SUCLG2	Succinyl-CoA synthetase-like||Succinyl-CoA synthetase, beta subunit, conserved site||ATP-citrate lyase/succinyl-CoA ligase||Succinate--CoA synthetase, beta subunit||Succinate--CoA ligase [GDP-forming] subunit beta, mitochondrial||ATP-grasp fold, subdomain 1||ATP-grasp fold, succinyl-CoA synthetase-type
hsa_circ_0057799	2	202464808	202520201	+	55393	891	ENSG00000204217;	exon:202520087-202520201	BMPR2	Bone morphogenetic protein receptor type-2||Protein kinase domain||Protein kinase-like domain superfamily||Ser/Thr protein kinase, TGFB receptor||Transforming growth factor-beta receptor, type II||Activin types I and II receptor domain||Protein kinase, ATP binding site
novel_circ_0007513	14	35013345	35019074	+	5729	356	ENSG00000100883;	exon:35013346-35013494,exon:35013802-35013902,exon:35018966-35019074	SRP54	Signal recognition particle, SRP54 subunit, M-domain||Signal recognition particle SRP54, helical bundle||-||Signal recognition particle, SRP54 subunit, M-domain superfamily||Signal recognition particle, SRP54 subunit||Signal recognition particle, SRP54 subunit, eukaryotic||P-loop containing nucleoside triphosphate hydrolase||AAA+ ATPase domain||Signal recognition particle, SRP54 subunit, GTPase d…
novel_circ_0022209	2	172960759	172967444	+	6685	342	ENSG00000091428;	exon:172960760-172960813,exon:172961122-172961228,exon:172967261-172967444	RAPGEF4	Winged helix-like DNA-binding domain superfamily||Winged helix DNA-binding domain superfamily||Ras guanine-nucleotide exchange factor catalytic domain superfamily||Ras-like guanine nucleotide exchange factor, N-terminal||Cyclic nucleotide-binding-like||Ras-like guanine nucleotide exchange factor||DEP domain||RmlC-like jelly roll fold||Ras guanine-nucleotide exchange factor, conserved site||Ras gu…
novel_circ_0022208	2	172917801	172967444	+	49643	554	ENSG00000091428;	exon:172917802-172917874,exon:172922281-172922300,exon:172960760-172960813,exon:172961122-172961228,exon:172965562-172965683,exon:172967261-172967444	RAPGEF4	Winged helix-like DNA-binding domain superfamily||Winged helix DNA-binding domain superfamily||Ras guanine-nucleotide exchange factor catalytic domain superfamily||Ras-like guanine nucleotide exchange factor, N-terminal||Cyclic nucleotide-binding-like||Ras-like guanine nucleotide exchange factor||DEP domain||RmlC-like jelly roll fold||Ras guanine-nucleotide exchange factor, conserved site||Ras gu…
hsa_circ_0007678	10	98231511	98236164	+	4653	484	ENSG00000166024;	exon:98234446-98234516,exon:98235425-98235520,exon:98236024-98236164	R3HCC1L	Coiled-coil domain-containing protein R3HC1/R3HCL||Nucleotide-binding alpha-beta plait domain superfamily
novel_circ_0022200	2	172566855	172570824	+	3969	233	ENSG00000152256;	exon:172567200-172567259,exon:172568741-172568817,exon:172570726-172570824	PDK1	Histidine kinase/HSP90-like ATPase superfamily||Alpha-ketoacid/pyruvate dehydrogenase kinase, N-terminal domain superfamily||Branched-chain alpha-ketoacid dehydrogenase kinase/Pyruvate dehydrogenase kinase, N-terminal||Histidine kinase domain||-||Histidine kinase/HSP90-like ATPase||PDK/BCKDK protein kinase
hsa_circ_0027093	12	56670274	56673065	-	2791	373	ENSG00000110958;	exon:56670275-56670364	PTGES3	HSP20-like chaperone||CS domain
hsa_circ_0021606	11	33347292	33349287	+	1995	910	ENSG00000110422;	exon:33347293-33347414,exon:33347629-33347753,exon:33349147-33349287	HIPK3	Protein kinase, ATP binding site||Serine/threonine-protein kinase, active site||Protein kinase-like domain superfamily||-||Protein kinase domain
hsa_circ_0027090	12	56666203	56673065	-	6862	436	ENSG00000110958;	exon:56666204-56666266	PTGES3	HSP20-like chaperone||CS domain
hsa_circ_0007895	1	28035543	28058094	-	22551	429	ENSG00000158161;	exon:28035544-28035680,exon:28038839-28038905,exon:28042571-28042650,exon:28048383-28048426,exon:28057994-28058094	EYA3	EYA domain||EYA domain superfamily||Eyes absent homologue 3||Eyes absent family
novel_circ_0037699	8	89943252	89946295	-	3043	268	ENSG00000104320;	exon:89943253-89943366,exon:89946140-89946295	NBN	SMAD/FHA domain superfamily||-||Nibrin||Nibrin, second BRCT domain||BRCT domain||BRCT domain superfamily||DNA repair Nbs1, C-terminal||Nibrin-related||Forkhead-associated (FHA) domain
hsa_circ_0054710	2	61103852	61118116	+	14264	663	ENSG00000162929;	exon:61103853-61103998,exon:61117467-61117540,exon:61118028-61118116	KIAA1841	-||Domain of unknown function DUF3342||SANT/Myb domain
hsa_circ_0054711	2	61106562	61118116	+	11554	517	ENSG00000162929;	exon:61106563-61106662,exon:61108317-61108349,exon:61117357-61117385,exon:61117467-61117540,exon:61118028-61118116	KIAA1841	-||Domain of unknown function DUF3342||SANT/Myb domain
hsa_circ_0018533	10	68488466	68493570	-	5104	352	ENSG00000122912;	exon:68488467-68488629,exon:68493132-68493198,exon:68493449-68493570	SLC25A16	Mitochondrial carrier domain superfamily||-||Mitochondrial carrier protein||Mitochondrial substrate/solute carrier||Graves disease carrier protein
hsa_circ_0059545	20	18543018	18551175	+	8157	481	ENSG00000101310;	exon:18543019-18543172,exon:18545956-18546033,exon:18548609-18548770,exon:18551089-18551175	SEC23B	Zinc finger, Sec23/Sec24-type superfamily||Gelsolin-like domain||Gelsolin-like domain superfamily||Sec23/Sec24, trunk domain||Zinc finger, Sec23/Sec24-type||von Willebrand factor A-like domain superfamily||Protein transport protein Sec23||ADF-H/Gelsolin-like domain superfamily||Sec23/Sec24 beta-sandwich||Sec23/Sec24, helical domain||Sec23, C-terminal||Sec23/Sec24 helical domain superfamily
hsa_circ_0003596	9	134824599	134825904	+	1305	369	ENSG00000130635;	exon:134824600-134824855,exon:134825792-134825904	COL5A1	Laminin G domain||Fibrillar collagen, C-terminal||Collagen triple helix repeat||Concanavalin A-like lectin/glucanase domain superfamily
hsa_circ_0003597	9	112403994	112418958	+	14964	581	ENSG00000119471;	exon:112403995-112404158,exon:112405624-112405722,exon:112408907-112409021,exon:112416841-112416944,exon:112418860-112418958	HSDL2	Short-chain dehydrogenase/reductase, conserved site||SCP2 sterol-binding domain||NAD(P)-binding domain superfamily||Short-chain dehydrogenase/reductase SDR||SCP2 sterol-binding domain superfamily
novel_circ_0019115	1	85104523	85117859	+	13336	217	ENSG00000162643;	exon:85110048-85110135,exon:85117729-85117859	WDR63	-||WD40/YVTN repeat-like-containing domain superfamily||WD40-repeat-containing domain superfamily||WD40 repeat
novel_circ_0019114	1	85104523	85110135	+	5612	160	ENSG00000162643;	exon:85104524-85104597,exon:85110048-85110135	WDR63	-||WD40/YVTN repeat-like-containing domain superfamily||WD40-repeat-containing domain superfamily||WD40 repeat
novel_circ_0036378	8	102311298	102323495	-	12197	381	ENSG00000104517;	exon:102311299-102311496,exon:102323311-102323495	UBR5	-||Regulator of chromosome condensation 1/beta-lactamase-inhibitor protein II||HECT domain||Polyadenylate-binding protein/Hyperplastic disc protein||Zinc finger, UBR-type||E3 ubiquitin ligase EDD, ubiquitin-associated domain||PABC (PABP) domain||HECT, E3 ligase catalytic domain
hsa_circ_0010047	1	15563928	15564359	+	431	260	ENSG00000116138;	exon:15563929-15564111,exon:15564283-15564359	DNAJC16	DnaJ domain, conserved site||Thioredoxin-like superfamily||-||Thioredoxin domain||DnaJ domain||Chaperone J-domain superfamily
hsa_circ_0010041	1	15529087	15548428	+	19341	1041	ENSG00000116138;	exon:15529088-15529272	DNAJC16	DnaJ domain, conserved site||Thioredoxin-like superfamily||-||Thioredoxin domain||DnaJ domain||Chaperone J-domain superfamily
novel_circ_0036370	8	102261914	102265278	-	3364	417	ENSG00000104517;	exon:102261915-102262070,exon:102264474-102264558,exon:102265100-102265278	UBR5	-||Regulator of chromosome condensation 1/beta-lactamase-inhibitor protein II||HECT domain||Polyadenylate-binding protein/Hyperplastic disc protein||Zinc finger, UBR-type||E3 ubiquitin ligase EDD, ubiquitin-associated domain||PABC (PABP) domain||HECT, E3 ligase catalytic domain
novel_circ_0036372	8	102264473	102270183	-	5710	262	ENSG00000104517;	exon:102264474-102264558,exon:102265100-102265278	UBR5	-||Regulator of chromosome condensation 1/beta-lactamase-inhibitor protein II||HECT domain||Polyadenylate-binding protein/Hyperplastic disc protein||Zinc finger, UBR-type||E3 ubiquitin ligase EDD, ubiquitin-associated domain||PABC (PABP) domain||HECT, E3 ligase catalytic domain
novel_circ_0036373	8	102265099	102272772	-	7673	243	ENSG00000104517;	exon:102272529-102272772	UBR5	-||Regulator of chromosome condensation 1/beta-lactamase-inhibitor protein II||HECT domain||Polyadenylate-binding protein/Hyperplastic disc protein||Zinc finger, UBR-type||E3 ubiquitin ligase EDD, ubiquitin-associated domain||PABC (PABP) domain||HECT, E3 ligase catalytic domain
novel_circ_0036374	8	102271133	102272772	-	1639	354	ENSG00000104517;	exon:102271134-102271245,exon:102272529-102272772	UBR5	-||Regulator of chromosome condensation 1/beta-lactamase-inhibitor protein II||HECT domain||Polyadenylate-binding protein/Hyperplastic disc protein||Zinc finger, UBR-type||E3 ubiquitin ligase EDD, ubiquitin-associated domain||PABC (PABP) domain||HECT, E3 ligase catalytic domain
novel_circ_0036375	8	102271133	102280467	-	9334	356	ENSG00000104517;	exon:102271134-102271245,exon:102279036-102279208,exon:102280394-102280467	UBR5	-||Regulator of chromosome condensation 1/beta-lactamase-inhibitor protein II||HECT domain||Polyadenylate-binding protein/Hyperplastic disc protein||Zinc finger, UBR-type||E3 ubiquitin ligase EDD, ubiquitin-associated domain||PABC (PABP) domain||HECT, E3 ligase catalytic domain
hsa_circ_0010048	1	15626668	15643650	+	16982	751	ENSG00000197312;	exon:15626669-15626798,exon:15638307-15638434,exon:15643522-15643650	DDI2	Ubiquitin domain||Ubiquitin-like domain superfamily||-||Aspartic peptidase domain superfamily||DNA damage inducible protein 1 ubiquitin-like domain||Aspartic peptidase, DDI1-type
novel_circ_0036377	8	102288154	102289576	-	1422	234	ENSG00000104517;	exon:102288155-102288266,exon:102289453-102289576	UBR5	-||Regulator of chromosome condensation 1/beta-lactamase-inhibitor protein II||HECT domain||Polyadenylate-binding protein/Hyperplastic disc protein||Zinc finger, UBR-type||E3 ubiquitin ligase EDD, ubiquitin-associated domain||PABC (PABP) domain||HECT, E3 ligase catalytic domain
hsa_circ_0017713	10	11979056	12014184	-	35128	808	ENSG00000151461;	exon:11979057-11979165,exon:11997672-11997757,exon:12004530-12004727,exon:12014024-12014184	UPF2	Up-frameshift suppressor 2, C-terminal||Nonsense-mediated mRNA decay protein Nmd2/UPF2||MIF4G-like, type 3||Armadillo-type fold||MIF4G-like domain superfamily
novel_circ_0026450	3	183925554	183938060	-	12506	237	ENSG00000114770;	exon:183928747-183928825,exon:183937901-183938060	ABCC5	AAA+ ATPase domain||P-loop containing nucleoside triphosphate hydrolase||ABC transporter type 1, transmembrane domain superfamily||ABC transporter, conserved site||-||ABC transporter type 1, transmembrane domain||ABC transporter-like||Multidrug resistance-associated protein 5
novel_circ_0026451	3	183927329	183938060	-	10731	350	ENSG00000114770;	exon:183927330-183927443,exon:183928747-183928825,exon:183937901-183938060	ABCC5	AAA+ ATPase domain||P-loop containing nucleoside triphosphate hydrolase||ABC transporter type 1, transmembrane domain superfamily||ABC transporter, conserved site||-||ABC transporter type 1, transmembrane domain||ABC transporter-like||Multidrug resistance-associated protein 5
novel_circ_0026452	3	18394461	18420991	-	26530	234	ENSG00000182568;	exon:18420757-18420991	SATB1	SATB, ULD domain superfamily||SATB, CUT1-like DNA-binding domain||Homeobox-like domain superfamily||SATB, CUTL domain superfamily||-||Homeobox domain||Lambda repressor-like, DNA-binding domain superfamily||SATB, ubiquitin-like oligomerisation domain||CUT domain||DNA-binding protein SATB1/SATB2
novel_circ_0026453	3	183959732	183961654	-	1922	245	ENSG00000114770;	exon:183959733-183959835,exon:183961511-183961654	ABCC5	AAA+ ATPase domain||P-loop containing nucleoside triphosphate hydrolase||ABC transporter type 1, transmembrane domain superfamily||ABC transporter, conserved site||-||ABC transporter type 1, transmembrane domain||ABC transporter-like||Multidrug resistance-associated protein 5
novel_circ_0026454	3	183959732	183971919	-	12187	102	ENSG00000114770;	exon:183959733-183959835	ABCC5	AAA+ ATPase domain||P-loop containing nucleoside triphosphate hydrolase||ABC transporter type 1, transmembrane domain superfamily||ABC transporter, conserved site||-||ABC transporter type 1, transmembrane domain||ABC transporter-like||Multidrug resistance-associated protein 5
novel_circ_0026455	3	183959732	183978651	-	18919	357	ENSG00000114770;	exon:183959733-183959835,exon:183977517-183977624,exon:183978503-183978651	ABCC5	AAA+ ATPase domain||P-loop containing nucleoside triphosphate hydrolase||ABC transporter type 1, transmembrane domain superfamily||ABC transporter, conserved site||-||ABC transporter type 1, transmembrane domain||ABC transporter-like||Multidrug resistance-associated protein 5
novel_circ_0026457	3	183961510	183967766	-	6256	214	ENSG00000114770;	exon:183961511-183961654,exon:183967695-183967766	ABCC5	AAA+ ATPase domain||P-loop containing nucleoside triphosphate hydrolase||ABC transporter type 1, transmembrane domain superfamily||ABC transporter, conserved site||-||ABC transporter type 1, transmembrane domain||ABC transporter-like||Multidrug resistance-associated protein 5
hsa_circ_0049291	19	10631056	10632156	+	1100	578	ENSG00000129353;	exon:10631868-10631951,exon:10632044-10632156	SLC44A2	Choline transporter-like||-
novel_circ_0027328	3	45703437	45732151	+	28714	195	ENSG00000211456;	exon:45703438-45703535,exon:45732053-45732151	SACM1L	SAC domain||-
novel_circ_0020118	20	57170640	57183919	-	13279	273	ENSG00000101144;	exon:57174931-57175007,exon:57183722-57183919	BMP7	Transforming growth factor beta, conserved site||Cystine-knot cytokine||Transforming growth factor-beta, C-terminal||TGF-beta, propeptide||Transforming growth factor-beta-related
novel_circ_0027320	3	45110472	45118621	-	8149	209	ENSG00000163814;	exon:45118412-45118621	CDCP1	CUB domain-containing protein 1||Spermadhesin, CUB domain superfamily
novel_circ_0027325	3	45703437	45715253	+	11816	97	ENSG00000211456;	intron:45703438-45703535	SACM1L	SAC domain||-
novel_circ_0027324	3	45703437	45709647	+	6210	246	ENSG00000211456;	exon:45703438-45703535,exon:45709498-45709647	SACM1L	SAC domain||-
hsa_circ_0002221	4	84896910	84932363	-	35453	194	ENSG00000163625;	exon:84896911-84897010,exon:84898452-84898600,exon:84912252-84912319,exon:84932270-84932363	WDFY3	PH-BEACH domain||WD40-repeat-containing domain superfamily||BEACH domain superfamily||Zinc finger, RING/FYVE/PHD-type||BEACH domain||WD40/YVTN repeat-like-containing domain superfamily||Concanavalin A-like lectin/glucanase domain superfamily||Armadillo-type fold||WD40-repeat-containing domain||WD40 repeat||-||Zinc finger, FYVE-related||Zinc finger, FYVE/PHD-type||FYVE zinc finger||WD40 repeat, co…
hsa_circ_0002220	17	61984170	61985090	-	920	503	ENSG00000108510;	exon:61984171-61984367,exon:61984651-61984865,exon:61985000-61985090	MED13	Mediator complex subunit Med13, C-terminal||Mediator complex, subunit Med13, N-terminal, metazoa/fungi||-||MID domain of medPIWI
hsa_circ_0002223	14	96341521	96347341	-	5820	762	ENSG00000066739;	exon:96341522-96341701,exon:96345233-96345385,exon:96347179-96347341	ATG2B	Vacuolar protein sorting-associated protein 13, N-terminal domain||Autophagy-related protein 2||Autophagy-related, C-terminal
hsa_circ_0002225	17	82763964	82814934	+	50970	1083	ENSG00000141556;	exon:82763965-82764062,exon:82766267-82766368,exon:82814840-82814934	TBCD	Tubulin-specific chaperone D, C-terminal||-||Tubulin-folding cofactor D||Armadillo-like helical||Armadillo-type fold
hsa_circ_0002224	10	49945031	49958480	+	13394	13394	ENSG00000178440;ENSG00000204152;	exon:49945032-49945090,exon:49952126-49952219,exon:49952449-49952533	--;TIMM23B	-
hsa_circ_0002227	X	77557450	77558846	-	1396	373	ENSG00000085224;	exon:77557451-77557645,exon:77558669-77558846	ATRX	Zinc finger, RING/FYVE/PHD-type||ATRX, ADD domain||SNF2-like, N-terminal domain superfamily||Helicase superfamily 1/2, ATP-binding domain||Helicase, C-terminal||P-loop containing nucleoside triphosphate hydrolase||SNF2-related, N-terminal domain||-||Zinc finger, FYVE/PHD-type||ADD domain
hsa_circ_0002226	15	76283756	76295737	-	11981	694	ENSG00000140374;	exon:76283757-76283825,exon:76285637-76285738,exon:76286371-76286403,exon:76295591-76295737	ETFA	Electron transfer flavoprotein, alpha subunit, N-terminal||Electron transfer flavoprotein, alpha/beta-subunit, N-terminal||Electron transfer flavoprotein subunit alpha, conserved site||Electron transfer flavoprotein, alpha subunit, C-terminal||-||Electron transfer flavoprotein alpha subunit/FixB||DHS-like NAD/FAD-binding domain superfamily||Rossmann-like alpha/beta/alpha sandwich fold
hsa_circ_0002229	2	11765532	11767858	+	2326	297	ENSG00000134324;	exon:11765533-11765733,exon:11767763-11767858	LPIN1	LIPIN family||Lipin, N-terminal||HAD-like superfamily||Lipin, middle domain||LNS2/PITP||Lipin/Ned1/Smp2 (LNS2)||-||Phosphatidate phosphatase LPIN1
hsa_circ_0002228	7	16376091	16406337	-	30246	427	ENSG00000214960;	exon:16376092-16376241,exon:16406061-16406337	CRPPA	Nucleotide-diphospho-sugar transferases||4-diphosphocytidyl-2C-methyl-D-erythritol synthase, conserved site||Cytidylyltransferase IspD/TarI||D-ribitol-5-phosphate cytidylyltransferase, C-terminal
hsa_circ_0085468	8	123344883	123361646	-	16763	1669	ENSG00000156802;	exon:123344884-123345069	ATAD2	-||ATPase, AAA-type, conserved site||AAA+ ATPase domain||P-loop containing nucleoside triphosphate hydrolase||Bromodomain||AAA ATPase, AAA+ lid domain||ATPase family AAA domain-containing protein 2||ATPase, AAA-type, core||Bromodomain-like superfamily
hsa_circ_0085460	8	123333877	123339446	-	5569	760	ENSG00000156802;	exon:123333878-123334021,exon:123334200-123334322,exon:123339311-123339446	ATAD2	-||ATPase, AAA-type, conserved site||AAA+ ATPase domain||P-loop containing nucleoside triphosphate hydrolase||Bromodomain||AAA ATPase, AAA+ lid domain||ATPase family AAA domain-containing protein 2||ATPase, AAA-type, core||Bromodomain-like superfamily
hsa_circ_0085466	8	123344883	123348273	-	3390	912	ENSG00000156802;	exon:123344884-123345069,exon:123348183-123348273	ATAD2	-||ATPase, AAA-type, conserved site||AAA+ ATPase domain||P-loop containing nucleoside triphosphate hydrolase||Bromodomain||AAA ATPase, AAA+ lid domain||ATPase family AAA domain-containing protein 2||ATPase, AAA-type, core||Bromodomain-like superfamily
hsa_circ_0085465	8	123337624	123339446	-	1822	333	ENSG00000156802;	exon:123337625-123337821,exon:123339311-123339446	ATAD2	-||ATPase, AAA-type, conserved site||AAA+ ATPase domain||P-loop containing nucleoside triphosphate hydrolase||Bromodomain||AAA ATPase, AAA+ lid domain||ATPase family AAA domain-containing protein 2||ATPase, AAA-type, core||Bromodomain-like superfamily
hsa_circ_0012536	1	52458335	52468267	-	9932	557	ENSG00000134744;	exon:52461712-52461769,exon:52465070-52465173,exon:52468181-52468267	TUT4	Polymerase, nucleotidyl transferase domain||Zinc finger, CCHC-type superfamily||PAP/25A-associated||-||Zinc finger, CCHC-type
hsa_circ_0016443	1	214372710	214384788	-	12078	1970	ENSG00000152104;	exon:214372711-214372839	PTPN14	FERM conserved site||Ubiquitin-like domain superfamily||FERM central domain||PH-like domain superfamily||Protein-tyrosine phosphatase, non-receptor type-14/21||FERM/acyl-CoA-binding protein superfamily||Protein-tyrosine phosphatase, catalytic||PTP type protein phosphatase||FERM, C-terminal PH-like domain||Tyrosine specific protein phosphatases domain||PTPN14/21, FERM domain C-lobe||Protein-tyrosi…
hsa_circ_0016446	1	214383310	214386922	-	3612	1557	ENSG00000152104;	exon:214386844-214386922	PTPN14	FERM conserved site||Ubiquitin-like domain superfamily||FERM central domain||PH-like domain superfamily||Protein-tyrosine phosphatase, non-receptor type-14/21||FERM/acyl-CoA-binding protein superfamily||Protein-tyrosine phosphatase, catalytic||PTP type protein phosphatase||FERM, C-terminal PH-like domain||Tyrosine specific protein phosphatases domain||PTPN14/21, FERM domain C-lobe||Protein-tyrosi…
novel_circ_0021248	22	46231791	46232239	+	448	447	ENSG00000186951;	exon:46231792-46232239	PPARA	-||Nuclear hormone receptor, ligand-binding domain||Zinc finger, nuclear hormone receptor-type||Nuclear hormone receptor-like domain superfamily||Nuclear hormone receptor||Zinc finger, NHR/GATA-type||Peroxisome proliferator-activated receptor alpha||Peroxisome proliferator-activated receptor
novel_circ_0016169	1	155777621	155784089	-	6468	336	ENSG00000116580;	exon:155777622-155777820,exon:155778824-155778859,exon:155783986-155784089	GON4L	GON-4-like protein||Paired amphipathic helix superfamily||Myb-like domain||Paired amphipathic helix||Homeobox-like domain superfamily
hsa_circ_0037603	16	3504719	3515591	+	10872	557	ENSG00000103351;	exon:3504720-3504831,exon:3512383-3512478,exon:3515508-3515591	CLUAP1	-||Clusterin-associated protein-1
novel_circ_0021245	22	46176752	46198591	+	21839	332	ENSG00000186951;	exon:46176753-46176836,exon:46198342-46198591	PPARA	-||Nuclear hormone receptor, ligand-binding domain||Zinc finger, nuclear hormone receptor-type||Nuclear hormone receptor-like domain superfamily||Nuclear hormone receptor||Zinc finger, NHR/GATA-type||Peroxisome proliferator-activated receptor alpha||Peroxisome proliferator-activated receptor
novel_circ_0021246	22	46198344	46198591	+	247	246	ENSG00000186951;	exon:46198345-46198591	PPARA	-||Nuclear hormone receptor, ligand-binding domain||Zinc finger, nuclear hormone receptor-type||Nuclear hormone receptor-like domain superfamily||Nuclear hormone receptor||Zinc finger, NHR/GATA-type||Peroxisome proliferator-activated receptor alpha||Peroxisome proliferator-activated receptor
novel_circ_0021247	22	46218262	46220014	+	1752	340	ENSG00000186951;	exon:46218263-46218401,exon:46219812-46220014	PPARA	-||Nuclear hormone receptor, ligand-binding domain||Zinc finger, nuclear hormone receptor-type||Nuclear hormone receptor-like domain superfamily||Nuclear hormone receptor||Zinc finger, NHR/GATA-type||Peroxisome proliferator-activated receptor alpha||Peroxisome proliferator-activated receptor
hsa_circ_0042463	17	21011150	21015899	-	4749	413	ENSG00000124422;	exon:21011151-21011309,exon:21012830-21012935,exon:21015752-21015899	USP22	Ubiquitin specific protease domain||Ubiquitin specific protease, conserved site||Zinc finger, RING/FYVE/PHD-type||Zinc finger, UBP-type||-||Peptidase C19, ubiquitin carboxyl-terminal hydrolase||Papain-like cysteine peptidase superfamily
novel_circ_0021241	22	45793544	45807022	+	13478	492	ENSG00000130638;	intron:45793545-45793778,intron:45797163-45797226,intron:45798612-45798745,intron:45806959-45807022	ATXN10	Armadillo-type fold||Ataxin-10 domain||Armadillo-like helical
novel_circ_0016161	1	155756957	155760641	-	3684	459	ENSG00000116580;	exon:155756958-155757077,exon:155757180-155757323,exon:155760444-155760641	GON4L	GON-4-like protein||Paired amphipathic helix superfamily||Myb-like domain||Paired amphipathic helix||Homeobox-like domain superfamily
novel_circ_0016160	1	155756957	155758034	-	1077	262	ENSG00000116580;	exon:155756958-155757077,exon:155757180-155757323	GON4L	GON-4-like protein||Paired amphipathic helix superfamily||Myb-like domain||Paired amphipathic helix||Homeobox-like domain superfamily
hsa_circ_0016199	1	205169162	205187806	-	18644	1059	ENSG00000133059;	exon:205187418-205187806	DSTYK	Serine/threonine-protein kinase, active site||Protein kinase domain||Protein kinase-like domain superfamily||Protein kinase, ATP binding site||Serine-threonine/tyrosine-protein kinase, catalytic domain
novel_circ_0024141	2	54050957	54069264	+	18307	361	ENSG00000170634;	intron:54050958-54051050,intron:54057239-54057360,intron:54069116-54069264	ACYP2	Acylphosphatase-like domain superfamily||Acylphosphatase, conserved site||Acylphosphatase||Acylphosphatase-like domain||-
novel_circ_0008570	14	96379687	96382505	+	2818	325	ENSG00000100744;	exon:96379688-96379755,exon:96382247-96382505	GSKIP	GSK3B-interacting protein||GSKIP domain superfamily||GSKIP domain
novel_circ_0024145	2	54813231	54829477	+	16246	294	ENSG00000214595;	exon:54813232-54813391,exon:54829342-54829477	EML6	Cytochrome cd1-nitrite reductase-like, haem d1 domain superfamily||WD40/YVTN repeat-like-containing domain superfamily||HELP||WD40-repeat-containing domain superfamily||Anaphase-promoting complex subunit 4, WD40 domain||WD40 repeat, conserved site||Quinoprotein alcohol dehydrogenase-like superfamily||WD40 repeat||WD40-repeat-containing domain
novel_circ_0024146	2	54928312	54928751	+	439	126	ENSG00000214595;	exon:54928625-54928751	EML6	Cytochrome cd1-nitrite reductase-like, haem d1 domain superfamily||WD40/YVTN repeat-like-containing domain superfamily||HELP||WD40-repeat-containing domain superfamily||Anaphase-promoting complex subunit 4, WD40 domain||WD40 repeat, conserved site||Quinoprotein alcohol dehydrogenase-like superfamily||WD40 repeat||WD40-repeat-containing domain
novel_circ_0008579	14	96542242	96565214	+	22972	172	ENSG00000090060;	exon:96542243-96542296,exon:96542774-96542893	PAPOLA	Poly(A) polymerase, central domain||Nucleotidyltransferase, class I-like, C-terminal||-||Poly(A) polymerase||Poly(A) polymerase, RNA-binding domain||Polymerase, nucleotidyl transferase domain
novel_circ_0008578	14	96542242	96556413	+	14171	291	ENSG00000090060;	exon:96542243-96542296,exon:96556175-96556413	PAPOLA	Poly(A) polymerase, central domain||Nucleotidyltransferase, class I-like, C-terminal||-||Poly(A) polymerase||Poly(A) polymerase, RNA-binding domain||Polymerase, nucleotidyl transferase domain
novel_circ_0025895	3	15411244	15414162	-	2918	333	ENSG00000206562;	exon:15411245-15411437,exon:15414021-15414162	METTL6	Methyltransferase type 12||Methyltransferase-like||S-adenosyl-L-methionine-dependent methyltransferase
novel_circ_0025894	3	15411093	15415942	-	4849	170	ENSG00000206562;	exon:15415772-15415942	METTL6	Methyltransferase type 12||Methyltransferase-like||S-adenosyl-L-methionine-dependent methyltransferase
novel_circ_0025896	3	15411244	15415942	-	4698	662	ENSG00000206562;	exon:15411245-15411437,exon:15414021-15414162,exon:15415498-15415657,exon:15415772-15415942	METTL6	Methyltransferase type 12||Methyltransferase-like||S-adenosyl-L-methionine-dependent methyltransferase
novel_circ_0025891	3	153164765	153251786	+	87021	385	n/a	intergenic_region:153164766-153164965,intergenic_region:153247447-153247531,intergenic_region:153251684-153251786	--	-
novel_circ_0025890	3	153164765	153247531	+	82766	155	n/a	intergenic_region:153203845-153203916,intergenic_region:153247447-153247531	--	-
novel_circ_0034093	6	87214997	87218731	+	3734	279	ENSG00000188994;	exon:87214998-87215142,exon:87218596-87218731	ZNF292	Zinc finger C2H2 superfamily||Zinc finger C2H2-type||-
hsa_circ_0043333	17	38395308	38395998	+	690	287	ENSG00000274211;	exon:38395309-38395444,exon:38395848-38395998	SOCS7	SH2 domain superfamily||SOCS box-like domain superfamily||SH2 domain||Suppressor of cytokine signalling 7||SOCS7, SH2 domain||SOCS box domain||SOCS7, SOCS box domain
novel_circ_0034097	6	87356300	87371712	+	15412	321	ENSG00000111850;	intron:87356301-87356503,intron:87371593-87371712	SMIM8	UPF0708 protein C6orf162||-
novel_circ_0034095	6	87215902	87233527	+	17625	434	ENSG00000188994;	exon:87215903-87216057,exon:87216299-87216377,exon:87233325-87233527	ZNF292	Zinc finger C2H2 superfamily||Zinc finger C2H2-type||-
novel_circ_0034098	6	87356300	87375710	+	19410	230	ENSG00000111850;	intron:87375480-87375710	SMIM8	UPF0708 protein C6orf162||-
novel_circ_0019321	1	96769702	96777946	+	8244	282	ENSG00000117569;	exon:96769703-96769875,exon:96777836-96777946	PTBP2	RNA-binding domain superfamily||HnRNP-L/PTB||Polypyrimidine tract-binding protein1/2/3, RNA recognition motif 2||PTBP2, RNA recognition motif 1||PTBP2, RNA recognition motif 3||RNA recognition motif domain||Nucleotide-binding alpha-beta plait domain superfamily||PTBP1, RNA recognition motif 2-like||PTBP2, RNA recognition motif 4
novel_circ_0019323	1	96777584	96785254	+	7670	195	ENSG00000117569;	exon:96785059-96785254	PTBP2	RNA-binding domain superfamily||HnRNP-L/PTB||Polypyrimidine tract-binding protein1/2/3, RNA recognition motif 2||PTBP2, RNA recognition motif 1||PTBP2, RNA recognition motif 3||RNA recognition motif domain||Nucleotide-binding alpha-beta plait domain superfamily||PTBP1, RNA recognition motif 2-like||PTBP2, RNA recognition motif 4
novel_circ_0035945	7	76099439	76104275	-	4836	132	ENSG00000227038;	intron:76099440-76099514,intron:76099898-76099956	--	-
novel_circ_0035943	7	76098017	76101414	-	3397	462	ENSG00000227038;	intron:76098018-76098166,intron:76099440-76099514,intron:76099898-76099956,intron:76101232-76101414	--	-
hsa_circ_0007301	1	59321535	59332032	+	10497	10497	ENSG00000172456;	exon:59321623-59321750,exon:59331843-59332032	FGGY	FGGY carbohydrate kinase, pentulose kinase||-||Carbohydrate kinase, FGGY||Carbohydrate kinase, FGGY, C-terminal||Carbohydrate kinase, FGGY, N-terminal
hsa_circ_0007303	2	161367477	161395203	+	27726	723	ENSG00000115233;	exon:161367478-161367553,exon:161367784-161367903,exon:161371172-161371322,exon:161385464-161385571,exon:161391104-161391178,exon:161395078-161395203	PSMD14	MPN domain||JAB1/MPN/MOV34 metalloenzyme domain||Rpn11/EIF3F, C-terminal||26S Proteasome non-ATPase regulatory subunit 14
hsa_circ_0007302	1	40190771	40202614	+	11843	418	ENSG00000117000;	exon:40190772-40190853,exon:40195632-40195764,exon:40202412-40202614	RLF	Zinc finger C2H2-type||Zinc finger C2H2 superfamily
hsa_circ_0007304	5	55960401	55968396	-	7995	603	ENSG00000134352;	exon:55960402-55960561,exon:55968276-55968396	IL6ST	Long hematopoietin receptor, Gp130 family 2, conserved site||Immunoglobulin-like domain superfamily||Fibronectin type III superfamily||Type I cytokine receptor, cytokine-binding domain||Fibronectin type III||Immunoglobulin C2-set-like, ligand-binding||Immunoglobulin-like fold||-
hsa_circ_0007306	3	184305767	184306834	+	1067	495	ENSG00000175166;	exon:184306751-184306834	PSMD2	26S proteasome regulatory complex, non-ATPase subcomplex, Rpn1 subunit||Armadillo-type fold||Armadillo-like helical||RPN1/RPN2, N-terminal||Proteasome/cyclosome repeat||26S proteasome non-ATPase regulatory subunit RPN1, C-terminal||-
hsa_circ_0007308	4	39913610	39925933	-	12323	563	ENSG00000121892;	exon:39913611-39913726,exon:39917048-39917188,exon:39922622-39922748,exon:39925836-39925933	PDS5A	Sister chromatid cohesion protein Pds5||-||Armadillo-like helical||Armadillo-type fold
hsa_circ_0047650	18	49331863	49333853	-	1990	269	ENSG00000141627;	exon:49331864-49332006,exon:49333728-49333853	DYM	-||Dymeclin
novel_circ_0025231	3	123123335	123124343	+	1008	397	ENSG00000065485;	intron:123123336-123123571,intron:123124066-123124157,intron:123124272-123124343	PDIA5	Thioredoxin, conserved site||Thioredoxin-like superfamily||-||Thioredoxin domain||Protein disulfide-isomerase A5, N-terminal TRX-like b domain
novel_circ_0025235	3	123124065	123130616	+	6551	298	ENSG00000065485;	exon:123124066-123124157,exon:123124272-123124343,exon:123130480-123130616	PDIA5	Thioredoxin, conserved site||Thioredoxin-like superfamily||-||Thioredoxin domain||Protein disulfide-isomerase A5, N-terminal TRX-like b domain
hsa_circ_0036264	15	74189114	74193922	-	4808	493	ENSG00000137868;	exon:74191167-74191243,exon:74191424-74191491,exon:74193800-74193922	STRA6	Receptor for retinol uptake STRA6||-
novel_circ_0025236	3	123124065	123146259	+	22194	232	ENSG00000065485;	exon:123124066-123124157,exon:123124272-123124343,exon:123145522-123145592	PDIA5	Thioredoxin, conserved site||Thioredoxin-like superfamily||-||Thioredoxin domain||Protein disulfide-isomerase A5, N-terminal TRX-like b domain
novel_circ_0025239	3	123209198	123225297	+	16099	357	ENSG00000121542;	exon:123223559-123223722,exon:123225103-123225297	SEC22A	Vesicle-trafficking protein Sec22a||Longin domain||Longin-like domain superfamily||-
novel_circ_0025238	3	123209198	123216626	+	7428	267	ENSG00000065485;ENSG00000121542;	intron:123209199-123209399,intron:123216559-123216626	PDIA5;SEC22A	-
hsa_circ_0010902	1	23816674	23820593	-	3919	288	ENSG00000117305;	exon:23816675-23816770,exon:23817476-23817583,exon:23820510-23820593	HMGCL	Aldolase-type TIM barrel||Hydroxymethylglutaryl-CoA lyase, active site||Pyruvate carboxyltransferase
hsa_circ_0010906	1	24169416	24180854	-	11438	309	ENSG00000185436;	exon:24169417-24169601,exon:24180731-24180854	IFNLR1	Fibronectin type III superfamily||Immunoglobulin-like fold||Fibronectin type III
hsa_circ_0040029	16	69155870	69163178	+	7308	483	ENSG00000141076;	exon:69155871-69155993,exon:69160356-69160462,exon:69163083-69163178	UTP4	WD40/YVTN repeat-like-containing domain superfamily||Anaphase-promoting complex subunit 4, WD40 domain||WD40 repeat||Quinoprotein alcohol dehydrogenase-like superfamily||WD40-repeat-containing domain superfamily||WD40-repeat-containing domain
hsa_circ_0040021	16	69150536	69150904	+	368	264	ENSG00000141076;	exon:69150537-69150708,exon:69150813-69150904	UTP4	WD40/YVTN repeat-like-containing domain superfamily||Anaphase-promoting complex subunit 4, WD40 domain||WD40 repeat||Quinoprotein alcohol dehydrogenase-like superfamily||WD40-repeat-containing domain superfamily||WD40-repeat-containing domain
novel_circ_0033471	6	35637013	35643348	-	6335	338	ENSG00000096060;	intron:35637014-35637158,intron:35642720-35642843,intron:35643277-35643348	FKBP5	Tetratricopeptide-like helical domain superfamily||Tetratricopeptide repeat 1||Peptidyl-prolyl cis-trans isomerase, FKBP-type||FKBP-type peptidyl-prolyl cis-trans isomerase domain||Tetratricopeptide repeat||Tetratricopeptide repeat-containing domain||Peptidyl-prolyl cis-trans isomerase FKBP5
novel_circ_0033472	6	35637013	35646366	-	9353	347	ENSG00000096060;	intron:35637014-35637158,intron:35646163-35646366	FKBP5	Tetratricopeptide-like helical domain superfamily||Tetratricopeptide repeat 1||Peptidyl-prolyl cis-trans isomerase, FKBP-type||FKBP-type peptidyl-prolyl cis-trans isomerase domain||Tetratricopeptide repeat||Tetratricopeptide repeat-containing domain||Peptidyl-prolyl cis-trans isomerase FKBP5
novel_circ_0033473	6	35637013	35646850	-	9837	264	ENSG00000096060;	intron:35637014-35637158,intron:35646730-35646850	FKBP5	Tetratricopeptide-like helical domain superfamily||Tetratricopeptide repeat 1||Peptidyl-prolyl cis-trans isomerase, FKBP-type||FKBP-type peptidyl-prolyl cis-trans isomerase domain||Tetratricopeptide repeat||Tetratricopeptide repeat-containing domain||Peptidyl-prolyl cis-trans isomerase FKBP5
hsa_circ_0031608	14	34586229	34609742	-	23513	740	ENSG00000129515;	exon:34586230-34586305,exon:34609638-34609742	SNX6	Sorting nexin-6||PX domain superfamily||-||Sorting nexin Vps5-like, C-terminal||AH/BAR domain superfamily||Sorting nexin-5/6/32||Phox homologous domain
novel_circ_0033478	6	35672591	35679074	-	6483	283	ENSG00000096060;	intron:35672592-35672759,intron:35678958-35679074	FKBP5	Tetratricopeptide-like helical domain superfamily||Tetratricopeptide repeat 1||Peptidyl-prolyl cis-trans isomerase, FKBP-type||FKBP-type peptidyl-prolyl cis-trans isomerase domain||Tetratricopeptide repeat||Tetratricopeptide repeat-containing domain||Peptidyl-prolyl cis-trans isomerase FKBP5
hsa_circ_0031607	14	34575755	34609742	-	33987	867	ENSG00000129515;	exon:34575756-34575842,exon:34593045-34593150,exon:34608030-34608140,exon:34609638-34609742	SNX6	Sorting nexin-6||PX domain superfamily||-||Sorting nexin Vps5-like, C-terminal||AH/BAR domain superfamily||Sorting nexin-5/6/32||Phox homologous domain
hsa_circ_0000330	11	66639699	66640123	+	424	424	ENSG00000173933;ENSG00000248643;	exon:66639700-66640123	RBM4;RBM14-RBM4	-
hsa_circ_0000337	11	70354300	70356254	+	1954	419	ENSG00000131626;	exon:70354301-70354452,exon:70355639-70355811,exon:70356161-70356254	PPFIA1	LAR-interacting protein, Liprin||-||Liprin-alpha, SAM domain repeat 1||Liprin-alpha-1||Liprin-alpha, SAM domain repeat 3||Sterile alpha motif domain||Liprin-alpha, SAM domain repeat 2||Sterile alpha motif/pointed domain superfamily
hsa_circ_0000339	11	73707419	73718718	-	11299	312	ENSG00000175582;	exon:73718613-73718718	RAB6A	P-loop containing nucleoside triphosphate hydrolase||Small GTPase||-||Small GTP-binding protein domain
novel_circ_0037540	8	67506786	67518047	-	11261	440	ENSG00000165078;	exon:67506787-67506888,exon:67509517-67509618,exon:67511541-67511655,exon:67517923-67518047	CPA6	-||Metallocarboxypeptidase-like, propeptide||Peptidase M14, carboxypeptidase A||Carboxypeptidase A6||Carboxypeptidase, activation peptide
novel_circ_0037541	8	68017845	68022140	+	4295	226	ENSG00000046889;	exon:68019549-68019671,exon:68022036-68022140	PREX2	DEP domain||Guanine-nucleotide dissociation stimulator, CDC24, conserved site||PH-like domain superfamily||Dbl homology (DH) domain superfamily||Pleckstrin homology domain||Winged helix DNA-binding domain superfamily||Winged helix-like DNA-binding domain superfamily||PDZ domain||Dbl homology (DH) domain||PREX2, DEP domain 1||PDZ superfamily
hsa_circ_0014022	1	150492410	150497747	+	5337	543	ENSG00000143374;	exon:150492411-150492489,exon:150497530-150497747	TARS2	Aminoacyl-tRNA synthetase, class II||TGS-like||Beta-grasp domain superfamily||TGS||Threonyl/alanyl tRNA synthetase, SAD||Threonine-tRNA ligase, class IIa||-||Anticodon-binding domain superfamily||Aminoacyl-tRNA synthetase, class II (G/ P/ S/T)||Threonine-tRNA ligase catalytic core domain||Anticodon-binding||Threonyl/alanyl tRNA synthetase, class II-like, putative editing domain superfamily
novel_circ_0037545	8	68022035	68038292	+	16257	338	ENSG00000046889;	exon:68022036-68022140,exon:68027222-68027323,exon:68038159-68038292	PREX2	DEP domain||Guanine-nucleotide dissociation stimulator, CDC24, conserved site||PH-like domain superfamily||Dbl homology (DH) domain superfamily||Pleckstrin homology domain||Winged helix DNA-binding domain superfamily||Winged helix-like DNA-binding domain superfamily||PDZ domain||Dbl homology (DH) domain||PREX2, DEP domain 1||PDZ superfamily
novel_circ_0037546	8	68022035	68060779	+	38744	449	ENSG00000046889;	exon:68022036-68022140,exon:68027222-68027323,exon:68055830-68055974,exon:68060679-68060779	PREX2	DEP domain||Guanine-nucleotide dissociation stimulator, CDC24, conserved site||PH-like domain superfamily||Dbl homology (DH) domain superfamily||Pleckstrin homology domain||Winged helix DNA-binding domain superfamily||Winged helix-like DNA-binding domain superfamily||PDZ domain||Dbl homology (DH) domain||PREX2, DEP domain 1||PDZ superfamily
novel_circ_0037548	8	68030496	68044590	+	14094	264	ENSG00000046889;	exon:68030497-68030658,exon:68044487-68044590	PREX2	DEP domain||Guanine-nucleotide dissociation stimulator, CDC24, conserved site||PH-like domain superfamily||Dbl homology (DH) domain superfamily||Pleckstrin homology domain||Winged helix DNA-binding domain superfamily||Winged helix-like DNA-binding domain superfamily||PDZ domain||Dbl homology (DH) domain||PREX2, DEP domain 1||PDZ superfamily
novel_circ_0037549	8	68038158	68060779	+	22621	336	ENSG00000046889;	exon:68038159-68038292,exon:68044487-68044590,exon:68060679-68060779	PREX2	DEP domain||Guanine-nucleotide dissociation stimulator, CDC24, conserved site||PH-like domain superfamily||Dbl homology (DH) domain superfamily||Pleckstrin homology domain||Winged helix DNA-binding domain superfamily||Winged helix-like DNA-binding domain superfamily||PDZ domain||Dbl homology (DH) domain||PREX2, DEP domain 1||PDZ superfamily
novel_circ_0018245	1	39853969	39862935	-	8966	318	ENSG00000043514;	intron:39857246-39857417,intron:39862788-39862935	TRIT1	P-loop containing nucleoside triphosphate hydrolase||Zinc finger C2H2 superfamily||-||Matrin/U1-C-like, C2H2-type zinc finger||tRNA isopentenyltransferase, eukaryotes||Zinc finger, double-stranded RNA binding||Dimethylallyltransferase||IPP transferase
novel_circ_0009048	15	43441133	43441583	-	450	449	ENSG00000067369;	intron:43441134-43441583	TP53BP1	BRCT domain superfamily||-||Ribosomal protein L2, domain 2||BRCT domain||Tumour suppressor p53-binding protein-1 Tudor domain
novel_circ_0009049	15	43441525	43470066	-	28541	57	ENSG00000067369;	exon:43441526-43441583	TP53BP1	BRCT domain superfamily||-||Ribosomal protein L2, domain 2||BRCT domain||Tumour suppressor p53-binding protein-1 Tudor domain
hsa_circ_0005219	20	2116665	2117415	+	750	750	ENSG00000125834;	exon:2116666-2117415	STK35	Protein kinase, ATP binding site||Serine/threonine-protein kinase, active site||Protein kinase domain||-||Protein kinase-like domain superfamily
hsa_circ_0005218	9	93471140	93497599	+	26459	459	ENSG00000048828;	exon:93471141-93471387,exon:93476256-93476338,exon:93497471-93497599	FAM120A	PIN-like domain superfamily||Constitutive coactivator of PPAR-gamma
hsa_circ_0005211	15	59178392	59188216	-	9824	244	ENSG00000157483;	exon:59178393-59178537,exon:59188118-59188216	MYO1E	Class I myosin, motor domain||SH3-like domain superfamily||Myosin head, motor domain||Kinesin motor domain superfamily||-||Class I myosin tail homology domain||SH3 domain||P-loop containing nucleoside triphosphate hydrolase||IQ motif, EF-hand binding site||Unconventional myosin-Ie/If, SH3 domain
hsa_circ_0005210	6	138941334	138947913	-	6579	982	ENSG00000135597;	exon:138941335-138941489,exon:138947790-138947913	REPS1	RalBP1-associated Eps domain-containing protein 1||EF-hand domain pair||EH domain||-||EF-Hand 1, calcium-binding site||EF-hand domain
hsa_circ_0005213	X	119406459	119426354	+	19895	16407	ENSG00000077713;	exon:119406460-119406701	SLC25A43	Mitochondrial carrier protein||Mitochondrial carrier domain superfamily||Mitochondrial substrate/solute carrier
novel_circ_0016982	1	20770929	20776750	-	5821	153	ENSG00000127483;	exon:20776597-20776750	HP1BP3	Histone H5||Linker histone H1/H5, domain H15||Winged helix-like DNA-binding domain superfamily||Winged helix DNA-binding domain superfamily||Heterochromatin protein 1-binding protein 3||-
novel_circ_0016985	1	207757013	207767195	+	10182	182	ENSG00000117335;	exon:207767013-207767195	CD46	Sushi/SCR/CCP superfamily||-||Sushi/SCR/CCP domain||Membrane cofactor protein CD46
hsa_circ_0005214	6	135300499	135323324	-	22825	320	ENSG00000135541;	exon:135300500-135300558,exon:135302712-135302817,exon:135315902-135316040,exon:135318519-135318616,exon:135323162-135323324	AHI1	WD40-repeat-containing domain superfamily||SH3-like domain superfamily||WD40/YVTN repeat-like-containing domain superfamily||WD40 repeat||WD40-repeat-containing domain||SH3 domain||Jouberin, SH3 domain||-
hsa_circ_0005217	16	89544647	89550609	+	5962	455	ENSG00000197912;	exon:89544648-89544772	SPG7	Peptidase M41, FtsH extracellular||Peptidase M41-like||P-loop containing nucleoside triphosphate hydrolase||AAA+ ATPase domain||-||Peptidase M41||ATPase, AAA-type, core||AAA ATPase, AAA+ lid domain||Peptidase, FtsH
hsa_circ_0025148	12	6509716	6511252	+	1536	460	ENSG00000010292;	exon:6509717-6509792,exon:6510075-6510133,exon:6510629-6510810,exon:6511110-6511252	NCAPD2	-||Condensin subunit 1/Condensin-2 complex subunit D3||Condensin complex subunit 1, N-terminal||Condensin subunit 1||Armadillo-like helical||Armadillo-type fold||Condensin complex subunit 1, C-terminal
novel_circ_0036630	8	130112093	130128090	-	15997	228	ENSG00000153317;	exon:130112094-130112322	ASAP1	Pleckstrin homology domain||SH3-like domain superfamily||Ankyrin repeat-containing domain||Ankyrin repeat-containing domain superfamily||ASAP, PH domain||ArfGAP domain superfamily||AH/BAR domain superfamily||ASAP1, SH3 domain||Ankyrin repeat||ASAP1, BAR domain||SH3 domain||Arf GTPase activating protein||ARFGAP/RecO-like zinc finger||PH-like domain superfamily||-
novel_circ_0032701	6	138255435	138255769	+	334	333	ENSG00000112379;	exon:138255436-138255769	ARFGEF3	Mon2, dimerisation and cyclophilin-binding domain||Armadillo-type fold||Sec7 domain||Sec7, C-terminal
novel_circ_0032702	6	138441982	138447193	-	5211	323	ENSG00000135540;	exon:138441983-138442114,exon:138447001-138447193	NHSL1	-||Nance-Horan syndrome protein family
novel_circ_0032704	6	138447000	138496371	-	49371	152	ENSG00000135540;	exon:138496219-138496371	NHSL1	-||Nance-Horan syndrome protein family
hsa_circ_0038767	16	27703895	27708920	+	5025	319	ENSG00000047578;	exon:27703896-27703998,exon:27708705-27708920	KIAA0556	Protein KIAA0556||-||Domain of unknown function DUF4457
hsa_circ_0030550	13	79520809	79548394	+	27585	586	ENSG00000102471;	exon:79520810-79520975,exon:79543558-79543682,exon:79548328-79548394	NDFIP2	NEDD4/Bsd2||-
novel_circ_0016743	1	193232992	193249871	+	16879	161	ENSG00000134371;	exon:193232993-193233154	CDC73	Cell division control protein 73, C-terminal||-||Cell division control protein 73, C-terminal domain superfamily||Paf1 complex subunit Cdc73, N-terminal domain||Cdc73/Parafibromin
novel_circ_0016742	1	193232992	193237854	+	4862	246	ENSG00000134371;	exon:193236256-193236356,exon:193237708-193237854	CDC73	Cell division control protein 73, C-terminal||-||Cell division control protein 73, C-terminal domain superfamily||Paf1 complex subunit Cdc73, N-terminal domain||Cdc73/Parafibromin
novel_circ_0026151	3	170384532	170390464	+	5932	473	ENSG00000136603;	exon:170384533-170384765,exon:170390223-170390464	SKIL	c-SKI SMAD4-binding domain||Putative DNA-binding domain superfamily||SKI/SNO/DAC domain||-||Ski-related oncogene Sno||Ski-like, DNA-binding domain superfamily||SAND-like domain superfamily||Transcription regulator SKI/SnoN
novel_circ_0026152	3	170384532	170391260	+	6728	318	ENSG00000136603;	exon:170384533-170384627,exon:170391036-170391260	SKIL	c-SKI SMAD4-binding domain||Putative DNA-binding domain superfamily||SKI/SNO/DAC domain||-||Ski-related oncogene Sno||Ski-like, DNA-binding domain superfamily||SAND-like domain superfamily||Transcription regulator SKI/SnoN
novel_circ_0026155	3	171157459	171161336	-	3877	270	ENSG00000154310;	exon:171157460-171157664,exon:171161270-171161336	TNIK	Serine/threonine-protein kinase, active site||-||Protein kinase-like domain superfamily||Protein kinase domain||Protein kinase, ATP binding site||Citron homology (CNH) domain
novel_circ_0026154	3	171138190	171140509	-	2319	384	ENSG00000154310;	exon:171138191-171138379,exon:171139470-171139556,exon:171140399-171140509	TNIK	Serine/threonine-protein kinase, active site||-||Protein kinase-like domain superfamily||Protein kinase domain||Protein kinase, ATP binding site||Citron homology (CNH) domain
novel_circ_0023301	2	239895204	239912990	-	17786	298	ENSG00000130414;	intron:239895205-239895314,intron:239912801-239912990	NDUFA10	-||Deoxynucleoside kinase domain||P-loop containing nucleoside triphosphate hydrolase||NADH dehydrogenase [ubiquinone] 1 alpha subcomplex subunit 10, mitochondrial
novel_circ_0026156	3	171157459	171167270	-	9811	238	ENSG00000154310;	exon:171157460-171157666,exon:171167238-171167270	TNIK	Serine/threonine-protein kinase, active site||-||Protein kinase-like domain superfamily||Protein kinase domain||Protein kinase, ATP binding site||Citron homology (CNH) domain
novel_circ_0026158	3	171175251	171194635	-	19384	318	ENSG00000154310;	exon:171175252-171175330,exon:171188702-171188832,exon:171194525-171194635	TNIK	Serine/threonine-protein kinase, active site||-||Protein kinase-like domain superfamily||Protein kinase domain||Protein kinase, ATP binding site||Citron homology (CNH) domain
hsa_circ_0013340	1	100906851	100918127	+	11276	524	ENSG00000162695;	exon:100913663-100913806,exon:100918077-100918127	SLC30A7	Cation efflux protein||Cation efflux transmembrane domain superfamily||-
hsa_circ_0013348	1	100911062	100921841	+	10779	546	ENSG00000162695;	exon:100911063-100911150,exon:100912112-100912238	SLC30A7	Cation efflux protein||Cation efflux transmembrane domain superfamily||-
hsa_circ_0072918	5	72861807	72875737	+	13930	446	ENSG00000083312;	exon:72861808-72861914,exon:72865596-72865729	TNPO1	Armadillo-type fold||Armadillo-like helical||Importin beta family||Importin-beta, N-terminal domain||-
hsa_circ_0042858	17	30785918	30793672	-	7754	469	ENSG00000176390;	exon:30793450-30793672	CRLF3	Fibronectin type III superfamily||Immunoglobulin-like fold||Fibronectin type III||-
novel_circ_0011417	16	70532478	70535420	+	2942	253	ENSG00000189091;	exon:70532479-70532620,exon:70535308-70535420	SF3B3	WD40/YVTN repeat-like-containing domain superfamily||-||WD40-repeat-containing domain superfamily||Cleavage/polyadenylation specificity factor, A subunit, C-terminal
novel_circ_0020655	21	46643531	46644488	+	957	289	ENSG00000160310;	exon:46643532-46643639,exon:46644306-46644488	PRMT2	S-adenosyl-L-methionine-dependent methyltransferase||SH3-like domain superfamily||Methyltransferase small domain||SH3 domain||Protein arginine N-methyltransferase
novel_circ_0020657	21	46643534	46649739	+	6205	104	ENSG00000160310;	exon:46643535-46643639	PRMT2	S-adenosyl-L-methionine-dependent methyltransferase||SH3-like domain superfamily||Methyltransferase small domain||SH3 domain||Protein arginine N-methyltransferase
novel_circ_0020652	21	46529091	46534687	+	5596	302	ENSG00000160305;	exon:46529092-46529183,exon:46534004-46534113,exon:46534585-46534687	DIP2A	AMP-dependent synthetase-like superfamily||DMAP1-binding domain||AMP-dependent synthetase/ligase
novel_circ_0020653	21	46532126	46534113	+	1987	232	ENSG00000160305;	exon:46533524-46533647,exon:46534004-46534113	DIP2A	AMP-dependent synthetase-like superfamily||DMAP1-binding domain||AMP-dependent synthetase/ligase
novel_circ_0020658	21	46644305	46649739	+	5434	343	ENSG00000160310;	exon:46644306-46644488,exon:46648458-46648619	PRMT2	S-adenosyl-L-methionine-dependent methyltransferase||SH3-like domain superfamily||Methyltransferase small domain||SH3 domain||Protein arginine N-methyltransferase
novel_circ_0020659	21	46648457	46649739	+	1282	325	ENSG00000160310;	exon:46648458-46648619,exon:46649575-46649739	PRMT2	S-adenosyl-L-methionine-dependent methyltransferase||SH3-like domain superfamily||Methyltransferase small domain||SH3 domain||Protein arginine N-methyltransferase
novel_circ_0028081	4	102576875	102584820	+	7945	229	ENSG00000109320;	exon:102582866-102582957,exon:102584682-102584820	NFKB1	Rel homology dimerisation domain||p53-like transcription factor, DNA-binding||Ankyrin repeat-containing domain||Ankyrin repeat-containing domain superfamily||Rel homology domain, conserved site||-||IPT domain||Immunoglobulin E-set||Rel homology domain (RHD), DNA-binding domain superfamily||Ankyrin repeat||Death domain||Rel homology domain (RHD), DNA-binding domain||Nuclear factor NF-kappa-B, p105…
novel_circ_0028083	4	102580534	102582957	+	2423	256	ENSG00000109320;	exon:102580535-102580639,exon:102582573-102582634,exon:102582866-102582957	NFKB1	Rel homology dimerisation domain||p53-like transcription factor, DNA-binding||Ankyrin repeat-containing domain||Ankyrin repeat-containing domain superfamily||Rel homology domain, conserved site||-||IPT domain||Immunoglobulin E-set||Rel homology domain (RHD), DNA-binding domain superfamily||Ankyrin repeat||Death domain||Rel homology domain (RHD), DNA-binding domain||Nuclear factor NF-kappa-B, p105…
novel_circ_0028082	4	102576875	102601009	+	24134	277	ENSG00000109320;	exon:102576876-102577039,exon:102600895-102601009	NFKB1	Rel homology dimerisation domain||p53-like transcription factor, DNA-binding||Ankyrin repeat-containing domain||Ankyrin repeat-containing domain superfamily||Rel homology domain, conserved site||-||IPT domain||Immunoglobulin E-set||Rel homology domain (RHD), DNA-binding domain superfamily||Ankyrin repeat||Death domain||Rel homology domain (RHD), DNA-binding domain||Nuclear factor NF-kappa-B, p105…
novel_circ_0028084	4	102580534	102584820	+	4286	333	ENSG00000109320;	exon:102580535-102580639,exon:102582866-102582957,exon:102584682-102584820	NFKB1	Rel homology dimerisation domain||p53-like transcription factor, DNA-binding||Ankyrin repeat-containing domain||Ankyrin repeat-containing domain superfamily||Rel homology domain, conserved site||-||IPT domain||Immunoglobulin E-set||Rel homology domain (RHD), DNA-binding domain superfamily||Ankyrin repeat||Death domain||Rel homology domain (RHD), DNA-binding domain||Nuclear factor NF-kappa-B, p105…
novel_circ_0028089	4	102664684	102679709	-	15025	351	ENSG00000109323;	exon:102664685-102664852,exon:102668963-102669049,exon:102679611-102679709	MANBA	Beta-mannosidase, Ig-fold domain||Beta-Galactosidase/glucuronidase domain superfamily||Galactose-binding-like domain superfamily||Glycoside hydrolase superfamily||Glycoside hydrolase family 2, catalytic domain||Mannosidase Ig/CBM-like domain||-||Immunoglobulin-like fold||LRRC37A/B like protein 1, C-terminal
novel_circ_0029938	4	86758259	86767976	+	9717	440	ENSG00000163629;	exon:86758260-86758349,exon:86758678-86758785,exon:86766432-86766517,exon:86767817-86767976	PTPN13	FERM domain||KIND domain||Band 4.1 domain||FERM, N-terminal||PDZ superfamily||Tyrosine specific protein phosphatases domain||FERM superfamily, second domain||Protein-tyrosine phosphatase-like||FERM/acyl-CoA-binding protein superfamily||PAZ domain superfamily||PDZ domain||FERM, C-terminal PH-like domain||PTP type protein phosphatase||Protein-tyrosine phosphatase, catalytic||Ubiquitin-like domain s…
novel_circ_0029939	4	86764592	86766517	+	1925	324	ENSG00000163629;	exon:86764593-86764739,exon:86765395-86765488,exon:86766432-86766517	PTPN13	FERM domain||KIND domain||Band 4.1 domain||FERM, N-terminal||PDZ superfamily||Tyrosine specific protein phosphatases domain||FERM superfamily, second domain||Protein-tyrosine phosphatase-like||FERM/acyl-CoA-binding protein superfamily||PAZ domain superfamily||PDZ domain||FERM, C-terminal PH-like domain||PTP type protein phosphatase||Protein-tyrosine phosphatase, catalytic||Ubiquitin-like domain s…
novel_circ_0029932	4	86716529	86735746	+	19217	188	ENSG00000163629;	exon:86716530-86716625,exon:86717024-86717117	PTPN13	FERM domain||KIND domain||Band 4.1 domain||FERM, N-terminal||PDZ superfamily||Tyrosine specific protein phosphatases domain||FERM superfamily, second domain||Protein-tyrosine phosphatase-like||FERM/acyl-CoA-binding protein superfamily||PAZ domain superfamily||PDZ domain||FERM, C-terminal PH-like domain||PTP type protein phosphatase||Protein-tyrosine phosphatase, catalytic||Ubiquitin-like domain s…
novel_circ_0029933	4	86722211	86735746	+	13535	222	ENSG00000163629;	exon:86722212-86722434	PTPN13	FERM domain||KIND domain||Band 4.1 domain||FERM, N-terminal||PDZ superfamily||Tyrosine specific protein phosphatases domain||FERM superfamily, second domain||Protein-tyrosine phosphatase-like||FERM/acyl-CoA-binding protein superfamily||PAZ domain superfamily||PDZ domain||FERM, C-terminal PH-like domain||PTP type protein phosphatase||Protein-tyrosine phosphatase, catalytic||Ubiquitin-like domain s…
novel_circ_0029930	4	86701240	86722434	+	21194	222	ENSG00000163629;	exon:86722212-86722434	PTPN13	FERM domain||KIND domain||Band 4.1 domain||FERM, N-terminal||PDZ superfamily||Tyrosine specific protein phosphatases domain||FERM superfamily, second domain||Protein-tyrosine phosphatase-like||FERM/acyl-CoA-binding protein superfamily||PAZ domain superfamily||PDZ domain||FERM, C-terminal PH-like domain||PTP type protein phosphatase||Protein-tyrosine phosphatase, catalytic||Ubiquitin-like domain s…
novel_circ_0029931	4	86716529	86722434	+	5905	410	ENSG00000163629;	exon:86716530-86716625,exon:86717024-86717117,exon:86722212-86722434	PTPN13	FERM domain||KIND domain||Band 4.1 domain||FERM, N-terminal||PDZ superfamily||Tyrosine specific protein phosphatases domain||FERM superfamily, second domain||Protein-tyrosine phosphatase-like||FERM/acyl-CoA-binding protein superfamily||PAZ domain superfamily||PDZ domain||FERM, C-terminal PH-like domain||PTP type protein phosphatase||Protein-tyrosine phosphatase, catalytic||Ubiquitin-like domain s…
novel_circ_0029936	4	86758259	86759073	+	814	327	ENSG00000163629;	exon:86758260-86758349,exon:86758678-86758785,exon:86758942-86759073	PTPN13	FERM domain||KIND domain||Band 4.1 domain||FERM, N-terminal||PDZ superfamily||Tyrosine specific protein phosphatases domain||FERM superfamily, second domain||Protein-tyrosine phosphatase-like||FERM/acyl-CoA-binding protein superfamily||PAZ domain superfamily||PDZ domain||FERM, C-terminal PH-like domain||PTP type protein phosphatase||Protein-tyrosine phosphatase, catalytic||Ubiquitin-like domain s…
novel_circ_0029937	4	86758259	86766517	+	8258	374	ENSG00000163629;	exon:86758260-86758349,exon:86758678-86758785,exon:86765395-86765488,exon:86766432-86766517	PTPN13	FERM domain||KIND domain||Band 4.1 domain||FERM, N-terminal||PDZ superfamily||Tyrosine specific protein phosphatases domain||FERM superfamily, second domain||Protein-tyrosine phosphatase-like||FERM/acyl-CoA-binding protein superfamily||PAZ domain superfamily||PDZ domain||FERM, C-terminal PH-like domain||PTP type protein phosphatase||Protein-tyrosine phosphatase, catalytic||Ubiquitin-like domain s…
novel_circ_0029934	4	86750469	86751124	+	655	97	ENSG00000163629;	exon:86751027-86751124	PTPN13	FERM domain||KIND domain||Band 4.1 domain||FERM, N-terminal||PDZ superfamily||Tyrosine specific protein phosphatases domain||FERM superfamily, second domain||Protein-tyrosine phosphatase-like||FERM/acyl-CoA-binding protein superfamily||PAZ domain superfamily||PDZ domain||FERM, C-terminal PH-like domain||PTP type protein phosphatase||Protein-tyrosine phosphatase, catalytic||Ubiquitin-like domain s…
novel_circ_0029935	4	86750469	86753065	+	2596	56	ENSG00000163629;	exon:86753009-86753065	PTPN13	FERM domain||KIND domain||Band 4.1 domain||FERM, N-terminal||PDZ superfamily||Tyrosine specific protein phosphatases domain||FERM superfamily, second domain||Protein-tyrosine phosphatase-like||FERM/acyl-CoA-binding protein superfamily||PAZ domain superfamily||PDZ domain||FERM, C-terminal PH-like domain||PTP type protein phosphatase||Protein-tyrosine phosphatase, catalytic||Ubiquitin-like domain s…
hsa_circ_0005634	20	36499587	36526006	+	26419	750	ENSG00000080845;	exon:36499588-36499676,exon:36524250-36524341,exon:36525851-36526006	DLGAP4	Disks large-associated protein 4||SAPAP family
hsa_circ_0001992	1	243304712	243344331	+	39619	798	ENSG00000054282;	exon:243304713-243304777,exon:243344215-243344331	SDCCAG8	Serologically defined colon cancer antigen 8
hsa_circ_0001993	18	76849525	76871825	+	22300	612	ENSG00000130856;	exon:76849526-76849668,exon:76851775-76851939,exon:76868685-76868863,exon:76871701-76871825	ZNF236	Zinc finger C2H2-type||-||Zinc finger C2H2 superfamily
novel_circ_0039917	X	130129501	130131799	-	2298	250	ENSG00000156709;	exon:130129502-130129628,exon:130131675-130131799	AIFM1	FAD/NAD(P)-binding domain superfamily||FAD/NAD(P)-binding domain||Mitochondrial apoptosis-inducing factor, C-terminal domain||FAD/NAD-linked reductase, dimerisation domain superfamily||Protein MGARP, N-terminal||-
novel_circ_0028338	4	127663380	127687867	+	24487	329	ENSG00000164066;	exon:127663381-127663584,exon:127687741-127687867	INTU	-||PDZ superfamily||Protein inturned||PDZ domain
novel_circ_0039910	X	129565771	129569399	+	3628	355	ENSG00000122126;	exon:129565772-129565883,exon:129567254-129567363,exon:129569264-129569399	OCRL	OCRL1, PH domain||Endonuclease/exonuclease/phosphatase||OCRL1/INPP5B, INPP5c domain||Endonuclease/exonuclease/phosphatase superfamily||Rho GTPase activation protein||Immunoglobulin-like fold||Inositol polyphosphate 5-phosphatase, clathrin binding domain||Rho GTPase-activating protein domain||-||Inositol polyphosphate-related phosphatase
novel_circ_0039913	X	129920456	129921587	+	1131	123	ENSG00000156697;	exon:129920457-129920580	UTP14A	Small-subunit processome, Utp14
novel_circ_0039912	X	129919174	129921587	+	2413	119	ENSG00000156697;	exon:129919175-129919294	UTP14A	Small-subunit processome, Utp14
novel_circ_0028331	4	124500895	124556510	-	55615	500	ENSG00000261083;	exon:124500896-124500994,exon:124504250-124504410,exon:124522107-124522204,exon:124534220-124534248,exon:124543667-124543710,exon:124556436-124556510	--	-
novel_circ_0039918	X	130136044	130138701	-	2657	336	ENSG00000156709;	exon:130136045-130136185,exon:130136643-130136731,exon:130138593-130138701	AIFM1	FAD/NAD(P)-binding domain superfamily||FAD/NAD(P)-binding domain||Mitochondrial apoptosis-inducing factor, C-terminal domain||FAD/NAD-linked reductase, dimerisation domain superfamily||Protein MGARP, N-terminal||-
novel_circ_0028335	4	127643520	127656721	+	13201	85	ENSG00000164066;	exon:127656636-127656721	INTU	-||PDZ superfamily||Protein inturned||PDZ domain
novel_circ_0028334	4	125463562	125481738	+	18176	104	ENSG00000196159;	exon:125463563-125463667	FAT4	Concanavalin A-like lectin/glucanase domain superfamily||EGF-like domain||Cadherin conserved site||EGF-like calcium-binding domain||EGF-like calcium-binding, conserved site||Cadherin-like||EGF-like, conserved site||Growth factor receptor cysteine-rich domain superfamily||Laminin G domain||Cadherin-like superfamily||EGF-type aspartate/asparagine hydroxylation site
novel_circ_0018800	1	62121180	62128945	+	7765	340	ENSG00000132849;	exon:62121181-62121295,exon:62127972-62128094,exon:62128841-62128945	PATJ	PDZ superfamily||-||PDZ domain||L27-2||L27 domain superfamily||L27 domain
hsa_circ_0074079	5	137985256	138011149	-	25893	631	ENSG00000031003;	exon:137985257-137985389	FAM13B	Rho GTPase activation protein||Rho GTPase-activating protein domain||Protein FAM13
novel_circ_0013855	18	321661	333143	-	11482	390	ENSG00000158270;	exon:321662-321807,exon:331668-331777,exon:333007-333143	COLEC12	Collagen triple helix repeat||CD209-like, C-type lectin-like domain||C-type lectin-like/link domain superfamily||C-type lectin, conserved site||C-type lectin fold||C-type lectin-like
novel_circ_0013856	18	331667	333143	-	1476	245	ENSG00000158270;	exon:331668-331777,exon:333007-333143	COLEC12	Collagen triple helix repeat||CD209-like, C-type lectin-like domain||C-type lectin-like/link domain superfamily||C-type lectin, conserved site||C-type lectin fold||C-type lectin-like
novel_circ_0013857	18	33607593	33627070	+	19477	290	ENSG00000141431;	exon:33607594-33607676,exon:33626862-33627070	ASXL3	Protein ASX-like, PHD domain||ASX homology domain||Polycomb protein ASX/ASX-like||-||HB1/Asxl, restriction endonuclease HTH domain||ASX-like protein 3
novel_circ_0013858	18	33607593	33646353	+	38760	190	ENSG00000141431;	exon:33607594-33607676,exon:33646245-33646353	ASXL3	Protein ASX-like, PHD domain||ASX homology domain||Polycomb protein ASX/ASX-like||-||HB1/Asxl, restriction endonuclease HTH domain||ASX-like protein 3
novel_circ_0018808	1	62441487	62442299	+	812	224	ENSG00000162607;	exon:62441488-62441608,exon:62442195-62442299	USP1	Ubiquitin specific protease, conserved site||Ubiquitin specific protease domain||Ubiquitin specific peptidase 1||Peptidase C19, ubiquitin carboxyl-terminal hydrolase||Papain-like cysteine peptidase superfamily||-
novel_circ_0011981	17	2617196	2638320	+	21124	284	ENSG00000007168;	intron:2617197-2617260,intron:2638099-2638320	PAFAH1B1	LIS1 homology motif||-||WD40 repeat, conserved site||LIS1, N-terminal||Dynein regulator LIS1||WD40 repeat||WD40-repeat-containing domain||WD40/YVTN repeat-like-containing domain superfamily||G-protein beta WD-40 repeat||WD40-repeat-containing domain superfamily
novel_circ_0011982	17	2635382	2638320	+	2938	221	ENSG00000007168;	exon:2638099-2638320	PAFAH1B1	LIS1 homology motif||-||WD40 repeat, conserved site||LIS1, N-terminal||Dynein regulator LIS1||WD40 repeat||WD40-repeat-containing domain||WD40/YVTN repeat-like-containing domain superfamily||G-protein beta WD-40 repeat||WD40-repeat-containing domain superfamily
novel_circ_0011983	17	2665371	2667198	+	1827	364	ENSG00000007168;	exon:2665372-2665456,exon:2666016-2666090,exon:2666992-2667198	PAFAH1B1	LIS1 homology motif||-||WD40 repeat, conserved site||LIS1, N-terminal||Dynein regulator LIS1||WD40 repeat||WD40-repeat-containing domain||WD40/YVTN repeat-like-containing domain superfamily||G-protein beta WD-40 repeat||WD40-repeat-containing domain superfamily
hsa_circ_0008568	14	34969169	34972064	-	2895	261	ENSG00000258704;	exon:34969170-34969307,exon:34971942-34972064	--	-
novel_circ_0011985	17	2665371	2676606	+	11235	185	ENSG00000007168;	exon:2665372-2665456,exon:2676505-2676606	PAFAH1B1	LIS1 homology motif||-||WD40 repeat, conserved site||LIS1, N-terminal||Dynein regulator LIS1||WD40 repeat||WD40-repeat-containing domain||WD40/YVTN repeat-like-containing domain superfamily||G-protein beta WD-40 repeat||WD40-repeat-containing domain superfamily
novel_circ_0011986	17	2665371	2680320	+	14949	84	ENSG00000007168;	exon:2665372-2665456	PAFAH1B1	LIS1 homology motif||-||WD40 repeat, conserved site||LIS1, N-terminal||Dynein regulator LIS1||WD40 repeat||WD40-repeat-containing domain||WD40/YVTN repeat-like-containing domain superfamily||G-protein beta WD-40 repeat||WD40-repeat-containing domain superfamily
hsa_circ_0008564	10	68487143	68516843	-	29700	712	ENSG00000122912;	exon:68487144-68487212,exon:68488467-68488629,exon:68493132-68493198,exon:68506585-68506718,exon:68516751-68516843	SLC25A16	Mitochondrial carrier domain superfamily||-||Mitochondrial carrier protein||Mitochondrial substrate/solute carrier||Graves disease carrier protein
novel_circ_0029685	4	73177379	73235080	-	57701	387	ENSG00000132466;	intron:73177380-73177533,intron:73190939-73191074,intron:73234981-73235080	ANKRD17	Ankyrin repeat-containing domain||K Homology domain||Ankyrin repeat-containing domain superfamily||Ankyrin repeat||K Homology domain, type 1 superfamily||K Homology domain, type 1
hsa_circ_0008566	1	176135009	176163891	-	28882	403	ENSG00000143207;	exon:176135010-176135086,exon:176163815-176163891	COP1	-||WD40 repeat, conserved site||WD40 repeat||WD40-repeat-containing domain||WD40/YVTN repeat-like-containing domain superfamily||Zinc finger, RING-type||Zinc finger, RING-type, conserved site||Zinc finger, RING/FYVE/PHD-type||WD40-repeat-containing domain superfamily
hsa_circ_0008567	12	132747831	132755133	-	7302	1049	ENSG00000176915;	exon:132747832-132748020	ANKLE2	-||Ankyrin repeat and LEM domain-containing protein 2||Ribonuclease H1, N-terminal||LEM domain||Ankyrin repeat and LEM domain-containing protein 2, LEM domain||Ankyrin repeat-containing domain superfamily||LEM/LEM-like domain superfamily||Ankyrin repeat-containing domain||Ribonuclease H1, N-terminal domain superfamily
novel_circ_0029680	4	73113791	73125312	-	11521	211	ENSG00000132466;	exon:73113792-73113908,exon:73115821-73115916	ANKRD17	Ankyrin repeat-containing domain||K Homology domain||Ankyrin repeat-containing domain superfamily||Ankyrin repeat||K Homology domain, type 1 superfamily||K Homology domain, type 1
novel_circ_0012722	17	51041500	51079704	-	38204	244	ENSG00000008294;	exon:51041501-51041651,exon:51047375-51047469	SPAG9	WD40-repeat-containing domain superfamily||RH1 domain||WD40/YVTN repeat-like-containing domain superfamily||JNK/Rab-associated protein-1, N-terminal||JNK-interacting protein, leucine zipper II||RH2 domain||JNK-interacting protein 3/4||-
novel_circ_0012725	17	51195213	51203925	-	8712	281	ENSG00000011258;	exon:51195214-51195361,exon:51203791-51203925	MBTD1	-||Mbt repeat||Zinc finger, FCS-type||FCS-type zinc finger superfamily
novel_circ_0012726	17	51201591	51203228	-	1637	481	ENSG00000011258;	exon:51201592-51201696,exon:51202022-51202077,exon:51202701-51202935,exon:51203140-51203228	MBTD1	-||Mbt repeat||Zinc finger, FCS-type||FCS-type zinc finger superfamily
novel_circ_0012728	17	51201591	51217416	-	15825	241	ENSG00000011258;	exon:51201592-51201696,exon:51202022-51202077,exon:51217334-51217416	MBTD1	-||Mbt repeat||Zinc finger, FCS-type||FCS-type zinc finger superfamily
hsa_circ_0006179	3	100732507	100736704	+	4197	294	ENSG00000114354;	exon:100732508-100732672,exon:100736576-100736704	TFG	PB1 domain||TFG, PB1 domain||Protein TFG
hsa_circ_0006178	13	95832926	95859675	-	26749	788	ENSG00000102595;	exon:95832927-95833053,exon:95837086-95837202,exon:95859591-95859675	UGGT2	UGGT, thioredoxin-like domain 2||Nucleotide-diphospho-sugar transferases||UGGT, thioredoxin-like domain 1||UDP-glucose:glycoprotein glucosyltransferase, thioredoxin-like domain 4||UDP-glucose:Glycoprotein Glucosyltransferase||UGGT, thioredoxin-like domain 3||Glucosyltransferase 24, catalytic domain
hsa_circ_0055019	2	68490189	68526242	+	36053	708	ENSG00000169621;	exon:68490190-68490261,exon:68502731-68502903,exon:68526061-68526242	APLF	G protein-coupled receptor, rhodopsin-like||-||Aprataxin and PNK-like factor, PBZ domain||SMAD/FHA domain superfamily||Forkhead-associated (FHA) domain||GPCR, rhodopsin-like, 7TM||Neuropeptide Y receptor family||PNK, FHA domain||Aprataxin and PNK-like factor
hsa_circ_0006171	16	71663898	71679535	-	15637	1095	ENSG00000040199;	exon:71663899-71664099,exon:71679389-71679535	PHLPP2	Leucine-rich repeat, typical subtype||-||Leucine-rich repeat domain superfamily||PPM-type phosphatase domain superfamily||PPM-type phosphatase domain||Leucine-rich repeat
hsa_circ_0006173	16	742249	742543	+	294	294	n/a	intergenic_region:742250-742543	--	-
hsa_circ_0006175	8	28970042	28980156	+	10114	563	ENSG00000147421;	exon:28980071-28980156	HMBOX1	Cro/C1-type helix-turn-helix domain||Lambda repressor-like, DNA-binding domain superfamily||Homeobox domain||-||Homeobox-containing protein 1||Homeobox-like domain superfamily||Hepatocyte nuclear factor 1, N-terminal
hsa_circ_0055014	2	68386501	68394176	+	7675	444	ENSG00000115956;	exon:68386502-68386686,exon:68388387-68388491,exon:68393162-68393245,exon:68394107-68394176	PLEK	Pleckstrin 1, DEP domain||Pleckstrin homology domain||Pleckstrin||PH-like domain superfamily||Winged helix-like DNA-binding domain superfamily||Winged helix DNA-binding domain superfamily||DEP domain
hsa_circ_0032176	14	64417887	64424931	+	7044	377	ENSG00000100714;	exon:64417888-64418024,exon:64424804-64424931	MTHFD1	Tetrahydrofolate dehydrogenase/cyclohydrolase, conserved site||Formate-tetrahydrofolate ligase, FTHFS||Formate-tetrahydrofolate ligase, FTHFS, conserved site||NAD(P)-binding domain superfamily||-||Tetrahydrofolate dehydrogenase/cyclohydrolase, catalytic domain||Tetrahydrofolate dehydrogenase/cyclohydrolase, NAD(P)-binding domain||Tetrahydrofolate dehydrogenase/cyclohydrolase||P-loop containing nu…
hsa_circ_0003529	1	38998170	39001106	+	2936	276	ENSG00000174574;	exon:38998171-38998311,exon:39000972-39001106	AKIRIN1	Akirin
hsa_circ_0003528	5	134697125	134708888	+	11763	741	ENSG00000113615;	exon:134697126-134697246,exon:134697899-134698057	SEC24A	ADF-H/Gelsolin-like domain superfamily||Sec23/Sec24 beta-sandwich||Sec23/Sec24, helical domain||Sec23/Sec24 helical domain superfamily||Zinc finger, Sec23/Sec24-type superfamily||Sec24-like, trunk domain||Gelsolin-like domain||Gelsolin-like domain superfamily||Sec23/Sec24, trunk domain||Zinc finger, Sec23/Sec24-type||von Willebrand factor A-like domain superfamily
hsa_circ_0003521	11	93702459	93706897	+	4438	475	ENSG00000166004;	exon:93702460-93702637	CEP295	ALMS motif||Centrosomal protein of 295kDa
hsa_circ_0003520	16	47109482	47132025	-	22543	849	ENSG00000171208;	exon:47109483-47109711,exon:47122868-47122912,exon:47128325-47128573,exon:47129224-47129364,exon:47131969-47132025	NETO2	CUB domain||LDL receptor-like superfamily||Low-density lipoprotein (LDL) receptor class A repeat||Spermadhesin, CUB domain superfamily||Neuropilin and tolloid-like protein 2||Low-density lipoprotein (LDL) receptor class A, conserved site
hsa_circ_0003523	2	109329223	109347949	+	18726	18726	ENSG00000172985;	intron:109329224-109329400,intron:109347674-109347949	SH3RF3	SH3RF3, SH3 domain 3||SH3 domain||E3 ubiquitin-protein ligase SH3RF1/SH3RF3||SH3RF1/SH3RF3, fourth SH3 domain||Zinc finger, RING/FYVE/PHD-type||SH3-like domain superfamily||Zinc finger, RING-type||Zinc finger, RING-type, conserved site
hsa_circ_0003522	2	101029490	101032385	-	2895	404	ENSG00000204634;	exon:101029491-101029776	TBC1D8	TBC1D8, PH-GRAM domain 2||EF-hand domain pair||Rab-GTPase-TBC domain superfamily||TBC1D8, PH-GRAM domain 1||Rab-GTPase-TBC domain||GRAM domain||PH-like domain superfamily
hsa_circ_0003525	2	127989563	127989866	-	303	303	ENSG00000136715;	exon:127989564-127989866	SAP130	Histone deacetylase complex subunit SAP130, C-terminal domain||Histone deacetylase complex subunit SAP130
hsa_circ_0003524	2	131071854	131082657	-	10803	165	ENSG00000152102;	exon:131071855-131071938,exon:131072022-131072254,exon:131082577-131082657	FAM168B	FAM168A/MANI
hsa_circ_0003527	1	205103856	205105168	-	1312	304	ENSG00000117222;	exon:205103857-205104019,exon:205105028-205105168	RBBP5	Retinoblastoma-binding protein 5/Swd1||WD40 repeat||WD40-repeat-containing domain||WD40/YVTN repeat-like-containing domain superfamily
hsa_circ_0054764	2	61229547	61236389	-	6842	422	ENSG00000115464;	exon:61229548-61229633,exon:61232452-61232532,exon:61236325-61236389	USP34	Papain-like cysteine peptidase superfamily||Peptidase C19, ubiquitin carboxyl-terminal hydrolase||-||Armadillo-type fold||Ubiquitin specific protease, conserved site||Ubiquitin specific protease domain
hsa_circ_0070400	4	88036219	88052158	+	15939	1007	ENSG00000118762;	exon:88036220-88036353,exon:88046794-88046870,exon:88051991-88052158	PKD2	Polycystin cation channel, PKD1/PKD2||Polycystic kidney disease type 2 protein||EF-hand domain||Voltage-dependent channel domain superfamily||EF-hand domain pair
hsa_circ_0059061	2	241342991	241346249	+	3258	332	ENSG00000168385;	exon:241342992-241343093,exon:241343752-241343897,exon:241346166-241346249	SEPT2	Septin 2||-||Septin||Septin-type guanine nucleotide-binding (G) domain||P-loop containing nucleoside triphosphate hydrolase
novel_circ_0004599	12	123194385	123203375	-	8990	340	ENSG00000051825;	exon:123194386-123194601,exon:123203250-123203375	MPHOSPH9	M-phase phosphoprotein 9||-
novel_circ_0010769	16	23079945	23108183	-	28238	344	ENSG00000103404;	exon:23079946-23080171,exon:23082438-23082557	USP31	Peptidase C19, ubiquitin carboxyl-terminal hydrolase||Papain-like cysteine peptidase superfamily||-||Ubiquitin specific protease domain||Ubiquitin specific protease, conserved site
novel_circ_0038027	9	110400853	110404552	-	3699	380	ENSG00000165124;	exon:110400854-110401009,exon:110404327-110404552	SVEP1	EGF-like calcium-binding domain||EGF-like domain||Pentraxin-related||Sushi/SCR/CCP domain||Concanavalin A-like lectin/glucanase domain superfamily||Sushi/SCR/CCP superfamily||Growth factor receptor cysteine-rich domain superfamily||von Willebrand factor, type A||EGF-like, conserved site||EGF-like calcium-binding, conserved site||von Willebrand factor A-like domain superfamily||EGF-type aspartate/…
novel_circ_0010762	16	22244629	22251322	+	6693	368	ENSG00000103319;	exon:22244630-22244730,exon:22248755-22248815,exon:22250654-22250691,exon:22251151-22251322	EEF2K	Tetratricopeptide-like helical domain superfamily||Sel1-like repeat||Eukaryotic elongation factor 2 kinase||-||Protein kinase-like domain superfamily||MHCK/EF2 kinase
novel_circ_0010760	16	22150694	22152634	+	1940	274	ENSG00000175267;	exon:22150695-22150846,exon:22152511-22152634	VWA3A	-||von Willebrand factor A-like domain superfamily||von Willebrand factor, type A
novel_circ_0010767	16	2246094	2246986	-	892	282	ENSG00000167969;	intron:2246095-2246250,intron:2246859-2246986	ECI1	Enoyl-CoA hydratase/isomerase||Enoyl-CoA hydratase/isomerase, conserved site||ClpP/crotonase-like domain superfamily
novel_circ_0014071	18	54280666	54287411	+	6745	457	ENSG00000101751;	exon:54280667-54280903,exon:54283922-54284013,exon:54287281-54287411	POLI	UmuC domain||DNA polymerase, Y-family, little finger domain||DNA polymerase, Y-family, little finger domain superfamily||-
novel_circ_0014077	18	55269830	55279656	-	9826	370	ENSG00000196628;	exon:55269831-55269963,exon:55275619-55275752,exon:55279551-55279656	TCF4	Myc-type, basic helix-loop-helix (bHLH) domain||Helix-loop-helix DNA-binding domain superfamily||-
novel_circ_0014076	18	55234547	55260027	-	25480	213	ENSG00000196628;	exon:55234548-55234683,exon:55259949-55260027	TCF4	Myc-type, basic helix-loop-helix (bHLH) domain||Helix-loop-helix DNA-binding domain superfamily||-
novel_circ_0014075	18	54877566	54888118	+	10552	379	ENSG00000041353;	exon:54877567-54877738,exon:54879369-54879454,exon:54887995-54888118	RAB27B	Small GTPase||P-loop containing nucleoside triphosphate hydrolase||Rab27a/b||Small GTP-binding protein domain
novel_circ_0014074	18	54877566	54884436	+	6870	359	ENSG00000041353;	exon:54877567-54877738,exon:54879369-54879454,exon:54884333-54884436	RAB27B	Small GTPase||P-loop containing nucleoside triphosphate hydrolase||Rab27a/b||Small GTP-binding protein domain
novel_circ_0002916	11	35201081	35204659	+	3578	379	ENSG00000026508;	exon:35201082-35201195,exon:35201668-35201787,exon:35204512-35204659	CD44	C-type lectin-like/link domain superfamily||CD44 antigen||C-type lectin fold||Link domain||-
novel_circ_0002914	11	35196745	35210054	+	13309	318	ENSG00000026508;	exon:35196746-35196874,exon:35208105-35208206,exon:35209965-35210054	CD44	C-type lectin-like/link domain superfamily||CD44 antigen||C-type lectin fold||Link domain||-
novel_circ_0002913	11	35196745	35204640	+	7895	247	ENSG00000026508;	exon:35201668-35201787,exon:35204512-35204640	CD44	C-type lectin-like/link domain superfamily||CD44 antigen||C-type lectin fold||Link domain||-
novel_circ_0002911	11	34957383	34992379	+	34996	421	ENSG00000110435;	exon:34957384-34957583,exon:34984570-34984728,exon:34992315-34992379	PDHX	2-oxoacid dehydrogenase acyltransferase, catalytic domain||Chloramphenicol acetyltransferase-like domain superfamily||Biotin/lipoyl attachment||E3-binding domain superfamily||Peripheral subunit-binding domain||2-oxo acid dehydrogenase, lipoyl-binding site||Single hybrid motif
novel_circ_0009039	15	43398040	43401850	+	3810	511	ENSG00000137822;	exon:43398041-43398179,exon:43399112-43399174,exon:43400044-43400221,exon:43401716-43401850	TUBGCP4	Gamma tubulin complex component, C-terminal||Gamma-tubulin complex component protein||-||Gamma tubulin complex component protein, N-terminal
novel_circ_0015838	1	12362719	12416827	+	54108	130	ENSG00000048707;	exon:12362720-12362850	VPS13D	UBA-like superfamily||Vacuolar protein sorting-associated protein 13D, UBA domain||Vacuolar protein sorting-associated protein 13, second N-terminal domain||-||Vacuolar protein sorting-associated protein 13, N-terminal domain||Vacuolar protein sorting-associated protein 13||VPS13, repeated coiled region||Ubiquitin-associated domain||Vacuolar protein sorting-associated protein 13, SHR-binding doma…
novel_circ_0015839	1	12400180	12403973	+	3793	393	ENSG00000048707;	exon:12400181-12400330,exon:12401608-12401704,exon:12403825-12403973	VPS13D	UBA-like superfamily||Vacuolar protein sorting-associated protein 13D, UBA domain||Vacuolar protein sorting-associated protein 13, second N-terminal domain||-||Vacuolar protein sorting-associated protein 13, N-terminal domain||Vacuolar protein sorting-associated protein 13||VPS13, repeated coiled region||Ubiquitin-associated domain||Vacuolar protein sorting-associated protein 13, SHR-binding doma…
novel_circ_0006027	12	96518927	96527444	+	8517	299	ENSG00000188596;	exon:96522088-96522189,exon:96527246-96527444	CFAP54	-||Cilia- and flagella-associated protein 54
novel_circ_0009030	15	43335695	43349045	+	13350	268	ENSG00000168803;	exon:43335696-43335826,exon:43348907-43349045	ADAL	Adenosine/AMP deaminase domain||Metal-dependent hydrolase||-
novel_circ_0006024	12	96298868	96311177	-	12309	295	ENSG00000059758;	exon:96298869-96298983,exon:96300304-96300360,exon:96311052-96311177	CDK17	Serine/threonine-protein kinase, active site||-||Protein kinase domain||Protein kinase-like domain superfamily||Protein kinase, ATP binding site
novel_circ_0004593	12	123160780	123203375	-	42595	193	ENSG00000051825;	exon:123160781-123160849,exon:123203250-123203375	MPHOSPH9	M-phase phosphoprotein 9||-
novel_circ_0006021	12	96294998	96300360	-	5362	241	ENSG00000059758;	exon:96294999-96295122,exon:96297270-96297332,exon:96300304-96300360	CDK17	Serine/threonine-protein kinase, active site||-||Protein kinase domain||Protein kinase-like domain superfamily||Protein kinase, ATP binding site
novel_circ_0006020	12	96294998	96298983	-	3985	270	ENSG00000059758;	exon:96297270-96297332,exon:96297627-96297721,exon:96298869-96298983	CDK17	Serine/threonine-protein kinase, active site||-||Protein kinase domain||Protein kinase-like domain superfamily||Protein kinase, ATP binding site
novel_circ_0004594	12	123165301	123166789	-	1488	309	ENSG00000051825;	exon:123165302-123165477,exon:123166655-123166789	MPHOSPH9	M-phase phosphoprotein 9||-
hsa_circ_0035252	15	50643339	50648885	-	5546	413	ENSG00000092439;	exon:50643340-50643553,exon:50648687-50648885	TRPM7	TRPM, SLOG domain||Transient receptor potential cation channel subfamily M member 7||TRPM, tetramerisation domain superfamily||TRPM, tetramerisation domain||Protein kinase-like domain superfamily||Ion transport domain||MHCK/EF2 kinase
hsa_circ_0035251	15	50639423	50663046	-	23623	657	ENSG00000092439;	exon:50639424-50639548,exon:50657781-50657819,exon:50662967-50663046	TRPM7	TRPM, SLOG domain||Transient receptor potential cation channel subfamily M member 7||TRPM, tetramerisation domain superfamily||TRPM, tetramerisation domain||Protein kinase-like domain superfamily||Ion transport domain||MHCK/EF2 kinase
hsa_circ_0024373	11	117161144	117163892	+	2748	240	ENSG00000168092;	exon:117161145-117161261,exon:117163770-117163892	PAFAH1B2	SGNH hydrolase superfamily||SGNH hydrolase-type esterase domain
hsa_circ_0028655	12	118177200	118181607	-	4407	366	ENSG00000135090;	exon:118177201-118177329	TAOK3	Protein kinase, ATP binding site||-||Protein kinase domain||Protein kinase-like domain superfamily||Serine/threonine-protein kinase, active site
hsa_circ_0062453	22	21970209	21972718	-	2509	379	ENSG00000100038;	exon:21970210-21970406,exon:21972612-21972718	TOP3B	DNA topoisomerase, type IA, active site||DNA topoisomerase, type IA, core domain||DNA topoisomerase, type IA, central region, subdomain 1||DNA topoisomerase 3-like, TOPRIM domain||DNA topoisomerase, type IA, central||DNA topoisomerase, type IA, central region, subdomain 2||DNA topoisomerase, type IA||TOPRIM domain||-||DNA topoisomerase, type IA, domain 2||DNA topoisomerase, type IA, DNA-binding d…
novel_circ_0001240	10	5765061	5773941	-	8880	99	n/a	intergenic_region:5773842-5773941	--	-
novel_circ_0001247	10	5785141	5786050	-	909	329	ENSG00000057608;	exon:5785142-5785273,exon:5785852-5786050	GDI2	Rab GDI protein||GDP dissociation inhibitor||FAD/NAD(P)-binding domain superfamily
novel_circ_0007378	14	31116235	31123047	-	6812	355	ENSG00000092148;	exon:31116236-31116458,exon:31122914-31123047	HECTD1	Ankyrin repeat-containing domain||HECT, E3 ligase catalytic domain||Armadillo-like helical||Ankyrin repeat-containing domain superfamily||Galactose-binding-like domain superfamily||SUN domain||Coagulation factor 5/8 C-terminal domain||Mib/herc2 domain superfamily||Armadillo-type fold||Ankyrin repeat||HECT domain||FKBP3, basic tilted helix bundle domain||-||Mib-herc2
novel_circ_0007379	14	31116235	31129448	-	13213	222	ENSG00000092148;	exon:31116236-31116458	HECTD1	Ankyrin repeat-containing domain||HECT, E3 ligase catalytic domain||Armadillo-like helical||Ankyrin repeat-containing domain superfamily||Galactose-binding-like domain superfamily||SUN domain||Coagulation factor 5/8 C-terminal domain||Mib/herc2 domain superfamily||Armadillo-type fold||Ankyrin repeat||HECT domain||FKBP3, basic tilted helix bundle domain||-||Mib-herc2
novel_circ_0007375	14	31113103	31119866	-	6763	156	ENSG00000092148;	exon:31119710-31119866	HECTD1	Ankyrin repeat-containing domain||HECT, E3 ligase catalytic domain||Armadillo-like helical||Ankyrin repeat-containing domain superfamily||Galactose-binding-like domain superfamily||SUN domain||Coagulation factor 5/8 C-terminal domain||Mib/herc2 domain superfamily||Armadillo-type fold||Ankyrin repeat||HECT domain||FKBP3, basic tilted helix bundle domain||-||Mib-herc2
novel_circ_0028506	4	142108092	142160561	-	52469	97	ENSG00000109452;	exon:142108093-142108190	INPP4B	Inositol 3,4-bisphosphate 4-phosphatase||C2 domain superfamily||-
novel_circ_0007372	14	31106645	31107704	-	1059	137	ENSG00000092148;	exon:31107567-31107704	HECTD1	Ankyrin repeat-containing domain||HECT, E3 ligase catalytic domain||Armadillo-like helical||Ankyrin repeat-containing domain superfamily||Galactose-binding-like domain superfamily||SUN domain||Coagulation factor 5/8 C-terminal domain||Mib/herc2 domain superfamily||Armadillo-type fold||Ankyrin repeat||HECT domain||FKBP3, basic tilted helix bundle domain||-||Mib-herc2
hsa_circ_0069447	4	39081102	39086727	+	5625	547	ENSG00000109790;	exon:39086515-39086727	KLHL5	SKP1/BTB/POZ domain superfamily||BTB/Kelch-associated||BTB/POZ domain||-||Kelch repeat type 1||Kelch-type beta propeller||BTB-kelch protein
novel_circ_0015843	1	12455997	12460396	+	4399	327	ENSG00000048707;	exon:12455998-12456130,exon:12460201-12460396	VPS13D	UBA-like superfamily||Vacuolar protein sorting-associated protein 13D, UBA domain||Vacuolar protein sorting-associated protein 13, second N-terminal domain||-||Vacuolar protein sorting-associated protein 13, N-terminal domain||Vacuolar protein sorting-associated protein 13||VPS13, repeated coiled region||Ubiquitin-associated domain||Vacuolar protein sorting-associated protein 13, SHR-binding doma…
novel_circ_0015842	1	12415086	12416827	+	1741	301	ENSG00000048707;	exon:12415087-12415221,exon:12416660-12416827	VPS13D	UBA-like superfamily||Vacuolar protein sorting-associated protein 13D, UBA domain||Vacuolar protein sorting-associated protein 13, second N-terminal domain||-||Vacuolar protein sorting-associated protein 13, N-terminal domain||Vacuolar protein sorting-associated protein 13||VPS13, repeated coiled region||Ubiquitin-associated domain||Vacuolar protein sorting-associated protein 13, SHR-binding doma…
novel_circ_0039720	X	106839307	106840884	+	1577	149	ENSG00000133138;	exon:106839308-106839457	TBC1D8B	-||Rab-GTPase-TBC domain superfamily||Recoverin family||TBC1D8B, PH-GRAM domain 1||GRAM domain||PH-like domain superfamily||EF-hand domain pair||EF-hand domain||Rab-GTPase-TBC domain||TBC1D8B, PH-GRAM domain 2
novel_circ_0004548	12	122530021	122539754	+	9733	193	ENSG00000184445;	exon:122538339-122538454,exon:122539676-122539754	KNTC1	-||RZZ complex, subunit KNTC1/ROD, C-terminal||WD40-repeat-containing domain superfamily
novel_circ_0004549	12	122530021	122543634	+	13613	282	ENSG00000184445;	exon:122530022-122530192,exon:122539676-122539754,exon:122543600-122543634	KNTC1	-||RZZ complex, subunit KNTC1/ROD, C-terminal||WD40-repeat-containing domain superfamily
novel_circ_0004546	12	122517226	122517430	-	204	203	ENSG00000111011;	exon:122517227-122517430	RSRC2	-||Small acidic protein-like domain
novel_circ_0001795	10	87051582	87062835	-	11253	287	ENSG00000148672;	exon:87051583-87051870	GLUD1	Glutamate/phenylalanine/leucine/valine dehydrogenase, dimerisation domain||NAD(P)-binding domain superfamily||Leu/Phe/Val dehydrogenases active site||NAD(P) binding domain of glutamate dehydrogenase||Glutamate/phenylalanine/leucine/valine dehydrogenase, C-terminal||Glutamate/phenylalanine/leucine/valine dehydrogenase
novel_circ_0001796	10	87508335	87521169	+	12834	330	ENSG00000107789;	exon:87508336-87508533,exon:87521036-87521169	MINPP1	Histidine acid phosphatase, eukaryotic||Histidine phosphatase superfamily, clade-2||Histidine phosphatase superfamily
novel_circ_0001797	10	87756788	87776427	-	19639	239	ENSG00000138138;	exon:87756789-87756922,exon:87776321-87776427	ATAD1	P-loop containing nucleoside triphosphate hydrolase||ATPase, AAA-type, conserved site||AAA+ ATPase domain||AAA ATPase, AAA+ lid domain||ATPase, AAA-type, core
novel_circ_0001791	10	86497200	86500743	-	3543	100	ENSG00000062650;	exon:86497201-86497301	WAPL	Armadillo-type fold||Wings apart-like protein, C-terminal||Armadillo-like helical||Wings apart-like protein||WAPL domain
novel_circ_0004540	12	12244261	12259895	-	15634	465	ENSG00000070018;	intron:12244262-12244655,intron:12259823-12259895	LRP6	EGF-like domain||Low-density lipoprotein (LDL) receptor class A, conserved site||Six-bladed beta-propeller, TolB-like||Low-density lipoprotein (LDL) receptor class A repeat||LDLR class B repeat||LDL receptor-like superfamily||-||Low density lipoprotein receptor-related protein 5/6
novel_circ_0003796	11	93691682	93702919	+	11237	235	ENSG00000166004;	exon:93691683-93691775,exon:93702776-93702919	CEP295	ALMS motif||Centrosomal protein of 295kDa
novel_circ_0003797	11	93696319	93702919	+	6600	240	ENSG00000166004;	exon:93696320-93696417,exon:93702776-93702919	CEP295	ALMS motif||Centrosomal protein of 295kDa
novel_circ_0003794	11	93408230	93415114	+	6884	310	ENSG00000165325;	exon:93408231-93408427,exon:93415000-93415114	DEUP1	Centrosomal protein Cep63/Deup1, N-terminal||-||Deuterosome assembly protein 1
novel_circ_0003792	11	93148652	93170221	-	21569	110	ENSG00000180773;	exon:93170111-93170221	SLC36A4	-||Amino acid transporter, transmembrane domain
novel_circ_0003793	11	93355370	93371280	+	15910	266	ENSG00000165325;	exon:93355371-93355542,exon:93356948-93357043	DEUP1	Centrosomal protein Cep63/Deup1, N-terminal||-||Deuterosome assembly protein 1
novel_circ_0003799	11	93723040	93724375	+	1335	369	ENSG00000166004;	exon:93723041-93723289,exon:93724254-93724375	CEP295	ALMS motif||Centrosomal protein of 295kDa
novel_circ_0040414	X	53409061	53409503	-	442	289	ENSG00000072501;	exon:53409062-53409269,exon:53409421-53409503	SMC1A	P-loop containing nucleoside triphosphate hydrolase||Structural maintenance of chromosomes protein 1A, metazoan||SMCs flexible hinge||-||Structural maintenance of chromosomes protein||RecF/RecN/SMC, N-terminal||SMCs flexible hinge superfamily
novel_circ_0007085	13	98920953	98930257	-	9304	298	ENSG00000088387;	exon:98920954-98921088,exon:98922051-98922146,exon:98923302-98923371	DOCK9	DHR-2 domain||-||PH-like domain superfamily||Dedicator of cytokinesis, C-terminal||Armadillo-type fold||C2 domain superfamily||Dedicator of cytokinesis||Dedicator of cytokinesis D, C2 domain||Dedicator of cytokinesis 9||Dedicator of cytokinesis C/D, N-terminal||DHR-1 domain||Pleckstrin homology domain
novel_circ_0002268	11	108479300	108491167	-	11867	391	ENSG00000178202;	exon:108479301-108479495,exon:108490970-108491167	POGLUT3	Glycosyl transferase CAP10 domain||-||Filamin/ABP280 repeat-like||Immunoglobulin-like fold||Filamin/ABP280 repeat||Immunoglobulin E-set
novel_circ_0007080	13	98845923	98856031	-	10108	496	ENSG00000088387;	exon:98845924-98846060,exon:98848592-98848639,exon:98850047-98850113,exon:98853408-98853522,exon:98855898-98856031	DOCK9	DHR-2 domain||-||PH-like domain superfamily||Dedicator of cytokinesis, C-terminal||Armadillo-type fold||C2 domain superfamily||Dedicator of cytokinesis||Dedicator of cytokinesis D, C2 domain||Dedicator of cytokinesis 9||Dedicator of cytokinesis C/D, N-terminal||DHR-1 domain||Pleckstrin homology domain
novel_circ_0002267	11	108477606	108491167	-	13561	301	ENSG00000178202;	exon:108477607-108477711,exon:108490970-108491167	POGLUT3	Glycosyl transferase CAP10 domain||-||Filamin/ABP280 repeat-like||Immunoglobulin-like fold||Filamin/ABP280 repeat||Immunoglobulin E-set
hsa_circ_0063490	22	41131387	41135906	+	4519	340	ENSG00000100393;	exon:41131388-41131633,exon:41135813-41135906	EP300	Coactivator CBP, KIX domain superfamily||CBP/p300, atypical RING domain superfamily||Bromodomain||Nuclear receptor coactivator, CREB-bp-like, interlocking||Nuclear receptor coactivator, interlocking||CBP/p300-type histone acetyltransferase domain||Bromodomain-like superfamily||Nuclear receptor coactivator, CREB-bp-like, interlocking domain superfamily||TAZ domain superfamily||Coactivator CBP, KIX…
novel_circ_0002260	11	108317372	108321420	+	4048	223	ENSG00000149311;	exon:108319954-108320058,exon:108321301-108321420	ATM	Armadillo-type fold||Phosphatidylinositol 3/4-kinase, conserved site||Telomere-length maintenance and DNA damage repair||Serine/threonine-protein kinase ATM/Tel1||FATC domain||Phosphatidylinositol 3-/4-kinase, catalytic domain||Phosphatidylinositol 3-/4-kinase, catalytic domain superfamily||-||PIK-related kinase||PIK-related kinase, FAT||Protein kinase-like domain superfamily
novel_circ_0002263	11	108329020	108335961	+	6941	198	ENSG00000149311;	exon:108333886-108333968,exon:108335845-108335961	ATM	Armadillo-type fold||Phosphatidylinositol 3/4-kinase, conserved site||Telomere-length maintenance and DNA damage repair||Serine/threonine-protein kinase ATM/Tel1||FATC domain||Phosphatidylinositol 3-/4-kinase, catalytic domain||Phosphatidylinositol 3-/4-kinase, catalytic domain superfamily||-||PIK-related kinase||PIK-related kinase, FAT||Protein kinase-like domain superfamily
novel_circ_0032117	5	96912636	96915769	+	3133	382	ENSG00000164308;	exon:96912637-96912798,exon:96913317-96913457,exon:96915688-96915769	ERAP2	Peptidase M1, membrane alanine aminopeptidase||Aminopeptidase N-type||-||ERAP2 aminopeptidase||Peptidase M1, alanine aminopeptidase/leukotriene A4 hydrolase||ERAP1-like C-terminal domain||Aminopeptidase N-like , N-terminal
hsa_circ_0057504	2	190514452	190525378	-	10926	856	ENSG00000189362;	exon:190525263-190525378	NEMP2	NEMP family||-
novel_circ_0024306	2	61481184	61484105	-	2921	423	ENSG00000082898;	exon:61481185-61481281,exon:61482380-61482539,exon:61483937-61484105	XPO1	Exportin-1, repeat 2||Armadillo-like helical||Importin-beta, N-terminal domain||Exportin-1/Importin-beta-like||Chromosome region maintenance repeat||Exportin-1, repeat 3||-||Armadillo-type fold||Exportin-1, C-terminal
novel_circ_0024307	2	61481184	61485962	-	4778	96	ENSG00000082898;	exon:61481185-61481281	XPO1	Exportin-1, repeat 2||Armadillo-like helical||Importin-beta, N-terminal domain||Exportin-1/Importin-beta-like||Chromosome region maintenance repeat||Exportin-1, repeat 3||-||Armadillo-type fold||Exportin-1, C-terminal
novel_circ_0024300	2	61347869	61350693	-	2824	125	ENSG00000115464;	exon:61350568-61350693	USP34	Papain-like cysteine peptidase superfamily||Peptidase C19, ubiquitin carboxyl-terminal hydrolase||-||Armadillo-type fold||Ubiquitin specific protease, conserved site||Ubiquitin specific protease domain
novel_circ_0024308	2	61482379	61488771	-	6392	342	ENSG00000082898;	exon:61482380-61482539,exon:61488588-61488771	XPO1	Exportin-1, repeat 2||Armadillo-like helical||Importin-beta, N-terminal domain||Exportin-1/Importin-beta-like||Chromosome region maintenance repeat||Exportin-1, repeat 3||-||Armadillo-type fold||Exportin-1, C-terminal
hsa_circ_0078364	6	154773988	154792976	+	18988	445	ENSG00000213079;	exon:154773989-154774072,exon:154778001-154778045,exon:154787861-154788022,exon:154792823-154792976	SCAF8	SCAF8, RNA recognition motif||ENTH/VHS||RNA-binding domain superfamily||CID domain||RNA polymerase II-binding domain||RNA recognition motif domain||Nucleotide-binding alpha-beta plait domain superfamily
hsa_circ_0078367	6	154773988	154810208	+	36220	1390	ENSG00000213079;	exon:154773989-154774072,exon:154778001-154778045,exon:154810015-154810208	SCAF8	SCAF8, RNA recognition motif||ENTH/VHS||RNA-binding domain superfamily||CID domain||RNA polymerase II-binding domain||RNA recognition motif domain||Nucleotide-binding alpha-beta plait domain superfamily
novel_circ_0000689	10	18596207	18616293	-	20086	228	ENSG00000241058;	exon:18596208-18596327,exon:18616184-18616293	NSUN6	PUA-like superfamily||SAM-dependent methyltransferase RsmB/NOP2-type||RNA (C5-cytosine) methyltransferase||S-adenosyl-L-methionine-dependent methyltransferase||PUA domain superfamily||PUA domain||Bacterial Fmu (Sun)/eukaryotic nucleolar NOL1/Nop2p, conserved site||-
novel_circ_0000685	10	18498354	18518968	+	20614	260	ENSG00000165995;	exon:18498355-18498477,exon:18518336-18518416,exon:18518910-18518968	CACNB2	-||Voltage-dependent calcium channel, L-type, beta subunit||Guanylate kinase/L-type calcium channel beta subunit||Voltage-dependent calcium channel, L-type, beta-2 subunit||P-loop containing nucleoside triphosphate hydrolase||SH3 domain||CACNB2, SH3 domain||SH3-like domain superfamily
novel_circ_0000684	10	18498354	18506547	+	8193	122	ENSG00000165995;	exon:18498355-18498477	CACNB2	-||Voltage-dependent calcium channel, L-type, beta subunit||Guanylate kinase/L-type calcium channel beta subunit||Voltage-dependent calcium channel, L-type, beta-2 subunit||P-loop containing nucleoside triphosphate hydrolase||SH3 domain||CACNB2, SH3 domain||SH3-like domain superfamily
novel_circ_0000687	10	18585948	18616293	-	30345	406	ENSG00000241058;	exon:18585949-18586093,exon:18614460-18614613,exon:18616184-18616293	NSUN6	PUA-like superfamily||SAM-dependent methyltransferase RsmB/NOP2-type||RNA (C5-cytosine) methyltransferase||S-adenosyl-L-methionine-dependent methyltransferase||PUA domain superfamily||PUA domain||Bacterial Fmu (Sun)/eukaryotic nucleolar NOL1/Nop2p, conserved site||-
novel_circ_0000686	10	18527587	18536196	+	8609	355	ENSG00000165995;	exon:18527588-18527697,exon:18534076-18534227,exon:18536101-18536196	CACNB2	-||Voltage-dependent calcium channel, L-type, beta subunit||Guanylate kinase/L-type calcium channel beta subunit||Voltage-dependent calcium channel, L-type, beta-2 subunit||P-loop containing nucleoside triphosphate hydrolase||SH3 domain||CACNB2, SH3 domain||SH3-like domain superfamily
novel_circ_0000682	10	179993	249088	+	69095	319	ENSG00000015171;	exon:179994-180128,exon:248903-249088	ZMYND11	PWWP domain||ZMYND8/11, PWWP domain||-||Zinc finger, FYVE/PHD-type||Zinc finger, PHD-finger||Zinc finger, RING/FYVE/PHD-type||Zinc finger, MYND-type||Bromodomain-like superfamily||Zinc finger, PHD-type||Bromodomain||Zinc finger, PHD-type, conserved site
novel_circ_0031623	5	66162108	66162592	+	484	342	ENSG00000153914;	exon:66162109-66162273,exon:66162414-66162592	SREK1	RNA-binding domain superfamily||Splicing regulatory glutamine/lysine-rich protein 1||RNA recognition motif domain||Nucleotide-binding alpha-beta plait domain superfamily||SREK1, RNA recognition motif 2||-
hsa_circ_0079943	7	40180946	40195060	+	14114	384	ENSG00000175600;	exon:40180947-40180998,exon:40181955-40182028,exon:40188495-40188580,exon:40189544-40189594,exon:40194940-40195060	SUGCT	-||CoA-transferase family III domain superfamily||CoA-transferase family III
hsa_circ_0079940	7	40078004	40078851	+	847	249	ENSG00000065883;	exon:40078005-40078121,exon:40078720-40078851	CDK13	Protein kinase, ATP binding site||-||Protein kinase-like domain superfamily||Protein kinase domain||Serine/threonine-protein kinase, active site
hsa_circ_0079947	7	42023467	42026412	-	2945	469	ENSG00000106571;	exon:42023468-42023608,exon:42025264-42025377,exon:42026199-42026412	GLI3	Transcription factor GLI3||Zinc finger C2H2 superfamily||Zinc finger C2H2-type||-
hsa_circ_0079948	7	42023467	42048696	-	25229	1024	ENSG00000106571;	exon:42023468-42023608	GLI3	Transcription factor GLI3||Zinc finger C2H2 superfamily||Zinc finger C2H2-type||-
novel_circ_0031628	5	6651841	6665639	+	13798	339	ENSG00000145545;	intron:6651842-6652008,intron:6665466-6665639	SRD5A1	3-oxo-5-alpha-steroid 4-dehydrogenase/very-long-chain enoyl-CoA reductase||3-oxo-5-alpha-steroid 4-dehydrogenase, C-terminal||-||3-oxo-5-alpha-steroid 4-dehydrogenase
novel_circ_0000539	10	127339005	127384909	+	45904	178	ENSG00000150760;	exon:127339006-127339084,exon:127343646-127343746	DOCK1	C2 domain superfamily||Dedicator of cytokinesis||DHR-1 domain||SH3-like domain superfamily||Dedicator of cytokinesis, N-terminal domain||Dedicator of cytokinesis, C-terminal||Dedicator of cytokinesis protein 1/5||DHR-2 domain||Armadillo-type fold||SH3 domain
novel_circ_0000538	10	127339005	127362212	+	23207	178	ENSG00000150760;	exon:127339006-127339084,exon:127343646-127343746	DOCK1	C2 domain superfamily||Dedicator of cytokinesis||DHR-1 domain||SH3-like domain superfamily||Dedicator of cytokinesis, N-terminal domain||Dedicator of cytokinesis, C-terminal||Dedicator of cytokinesis protein 1/5||DHR-2 domain||Armadillo-type fold||SH3 domain
novel_circ_0003132	11	57795576	57809466	+	13890	152	ENSG00000198561;	exon:57795577-57795729	CTNND1	Armadillo-type fold||Armadillo-like helical||Catenin delta-1||-||Plakophilin/Delta catenin||Armadillo
novel_circ_0003133	11	57801732	57804780	+	3048	117	ENSG00000198561;	exon:57804663-57804780	CTNND1	Armadillo-type fold||Armadillo-like helical||Catenin delta-1||-||Plakophilin/Delta catenin||Armadillo
novel_circ_0003130	11	57795576	57796992	+	1416	152	ENSG00000198561;	exon:57795577-57795729	CTNND1	Armadillo-type fold||Armadillo-like helical||Catenin delta-1||-||Plakophilin/Delta catenin||Armadillo
novel_circ_0003131	11	57795576	57804780	+	9204	269	ENSG00000198561;	exon:57795577-57795729,exon:57804663-57804780	CTNND1	Armadillo-type fold||Armadillo-like helical||Catenin delta-1||-||Plakophilin/Delta catenin||Armadillo
hsa_circ_0029219	12	123327425	123331375	-	3950	783	ENSG00000139697;	exon:123327426-123327579,exon:123330419-123330509,exon:123331242-123331375	SBNO1	Protein strawberry notch||Strawberry notch, AAA domain||P-loop containing nucleoside triphosphate hydrolase||Strawberry notch, helicase C domain
hsa_circ_0075061	5	173080584	173123202	+	42618	1995	ENSG00000164463;	exon:173080585-173080784,exon:173112306-173112379,exon:173123080-173123202	CREBRF	Basic-leucine zipper domain||-||CREB3 regulatory factor
hsa_circ_0075060	5	173080584	173086626	+	6042	326	ENSG00000164463;	exon:173080585-173080798,exon:173086501-173086626	CREBRF	Basic-leucine zipper domain||-||CREB3 regulatory factor
novel_circ_0006568	13	41252644	41254620	-	1976	279	ENSG00000120662;	exon:41252645-41252752,exon:41252949-41253030,exon:41254529-41254620	MTRF1	Peptide chain release factor class I/class II||-||Peptide chain release factor
hsa_circ_0023746	11	77955941	77961138	-	5197	447	ENSG00000149262;	exon:77955942-77956062,exon:77958746-77958834,exon:77960341-77960391,exon:77960953-77961138	INTS4	Armadillo-type fold||Armadillo-like helical||HEAT repeat associated with sister chromatid cohesion protein||-
novel_circ_0006563	13	41013077	41019432	-	6355	266	ENSG00000120690;	intron:41014159-41014221,intron:41019228-41019432	ELF1	Transcription factor Elf, N-terminal||Ets domain||-||Winged helix DNA-binding domain superfamily||Winged helix-like DNA-binding domain superfamily
novel_circ_0006560	13	40949805	40951436	-	1631	274	ENSG00000120690;	exon:40949806-40949973,exon:40951329-40951436	ELF1	Transcription factor Elf, N-terminal||Ets domain||-||Winged helix DNA-binding domain superfamily||Winged helix-like DNA-binding domain superfamily
hsa_circ_0023748	11	77955941	77981576	-	25635	672	ENSG00000149262;	exon:77955942-77956062,exon:77958746-77958834,exon:77978996-77979102,exon:77981459-77981576	INTS4	Armadillo-type fold||Armadillo-like helical||HEAT repeat associated with sister chromatid cohesion protein||-
novel_circ_0006566	13	41233889	41260915	-	27026	224	ENSG00000120662;	exon:41233890-41234007,exon:41252645-41252752	MTRF1	Peptide chain release factor class I/class II||-||Peptide chain release factor
novel_circ_0006565	13	41065163	41068737	+	3574	299	ENSG00000120688;	exon:41065164-41065287,exon:41068561-41068737	WBP4	Matrin/U1-C-like, C2H2-type zinc finger||U1-C, C2H2-type zinc finger||WW domain||Matrin/U1-C, C2H2-type zinc finger||WW domain superfamily||WW domain-binding protein 4||Zinc finger C2H2 superfamily
hsa_circ_0045416	17	67532801	67578257	+	45456	318	ENSG00000154217;	exon:67532802-67532950	PITPNC1	START-like domain superfamily||Phosphatidylinositol transfer protein
hsa_circ_0074332	5	141625207	141630125	-	4918	936	ENSG00000171720;	exon:141625208-141625365,exon:141629860-141629916,exon:141630044-141630125	HDAC3	Histone deacetylase domain||-||Histone deacetylase domain superfamily||Histone deacetylase||Ureohydrolase domain superfamily||Histone deacetylase family
hsa_circ_0021424	11	18283794	18286710	-	2916	341	ENSG00000110756;	exon:18283795-18283901,exon:18285346-18285459,exon:18286591-18286710	HPS5	Hermansky-Pudlak syndrome 5 protein||WD40/YVTN repeat-like-containing domain superfamily||-||WD40-repeat-containing domain superfamily
hsa_circ_0086708	9	33941648	33948587	-	6939	873	ENSG00000137073;	exon:33941649-33941862,exon:33943420-33943589,exon:33948374-33948587	UBAP2	Ubiquitin-associated domain||-||UBA-like superfamily||UBAP2/protein lingerer
hsa_circ_0086709	9	33941648	33953474	-	11826	1063	ENSG00000137073;	exon:33953285-33953474	UBAP2	Ubiquitin-associated domain||-||UBA-like superfamily||UBAP2/protein lingerer
hsa_circ_0021421	11	18281949	18288013	-	6064	889	ENSG00000110756;	exon:18281950-18282220,exon:18287535-18287690	HPS5	Hermansky-Pudlak syndrome 5 protein||WD40/YVTN repeat-like-containing domain superfamily||-||WD40-repeat-containing domain superfamily
hsa_circ_0087072	9	37495168	37498224	+	3056	339	ENSG00000137054;	exon:37495169-37495276,exon:37495890-37495986,exon:37498091-37498224	POLR1E	-||RNA polymerase I associated factor, A49-like
novel_circ_0038704	9	17484294	17487066	+	2772	262	ENSG00000044459;	exon:17484295-17484480,exon:17486989-17487066	CNTLN	Centlein
novel_circ_0038703	9	17457523	17466891	+	9368	191	ENSG00000044459;	exon:17457524-17457715	CNTLN	Centlein
novel_circ_0038702	9	17388161	17416189	+	28028	314	ENSG00000044459;	exon:17388162-17388253,exon:17415966-17416189	CNTLN	Centlein
novel_circ_0038700	9	17366616	17416189	+	49573	191	ENSG00000044459;	exon:17366617-17366717,exon:17388162-17388253	CNTLN	Centlein
novel_circ_0038709	9	19086733	19087156	-	423	422	ENSG00000147874;	exon:19086734-19087156	HAUS6	HAUS augmin-like complex subunit 6||HAUS augmin-like complex subunit 6, N-terminal
novel_circ_0037706	8	9007969	9020464	+	12495	223	ENSG00000104626;	exon:9018297-9018406,exon:9020350-9020464	ERI1	-||Ribonuclease H-like superfamily||SAP domain||Ribonuclease H superfamily||SAP domain superfamily||Exonuclease, RNase T/DNA polymerase III
novel_circ_0037707	8	9016321	9020464	+	4143	197	ENSG00000104626;	exon:9016322-9016405,exon:9020350-9020464	ERI1	-||Ribonuclease H-like superfamily||SAP domain||Ribonuclease H superfamily||SAP domain superfamily||Exonuclease, RNase T/DNA polymerase III
hsa_circ_0011692	1	36358238	36358822	-	584	230	ENSG00000196182;	exon:36358239-36358382,exon:36358737-36358822	STK40	Serine/threonine-protein kinase, active site||Protein kinase-like domain superfamily||Protein kinase domain||Serine/threonine-protein kinase 40||Pseudokinase tribbles family/serine-threonine-protein kinase 40
hsa_circ_0011693	1	36358238	36361340	-	3102	350	ENSG00000196182;	exon:36358239-36358382,exon:36358737-36358822,exon:36361221-36361340	STK40	Serine/threonine-protein kinase, active site||Protein kinase-like domain superfamily||Protein kinase domain||Serine/threonine-protein kinase 40||Pseudokinase tribbles family/serine-threonine-protein kinase 40
novel_circ_0037703	8	90017123	90019172	+	2049	345	ENSG00000104325;	exon:90017124-90017326,exon:90018909-90018966,exon:90019086-90019172	DECR1	NAD(P)-binding domain superfamily||Short-chain dehydrogenase/reductase SDR||-
novel_circ_0037701	8	89943252	89953691	-	10439	113	ENSG00000104320;	exon:89943253-89943366	NBN	SMAD/FHA domain superfamily||-||Nibrin||Nibrin, second BRCT domain||BRCT domain||BRCT domain superfamily||DNA repair Nbs1, C-terminal||Nibrin-related||Forkhead-associated (FHA) domain
hsa_circ_0081956	7	108496583	108497577	-	994	267	ENSG00000135241;	exon:108496584-108496755,exon:108497483-108497577	PNPLA8	-||Acyl transferase/acyl hydrolase/lysophospholipase||Patatin-like phospholipase domain
novel_circ_0037709	8	90618948	90631707	-	12759	399	ENSG00000253394;	intron:90618949-90619022,intron:90625691-90625862,intron:90631552-90631707	--	-
novel_circ_0000670	10	17599289	17604047	-	4758	326	ENSG00000165996;	exon:17599290-17599411,exon:17603560-17603648,exon:17603930-17604047	HACD1	-||Protein-tyrosine phosphatase-like, PTPLA
novel_circ_0035638	7	56054368	56058702	+	4334	216	ENSG00000146731;	exon:56054369-56054503,exon:56058620-56058702	CCT6A	T-complex protein 1, zeta subunit||TCP-1-like chaperonin intermediate domain superfamily||GroEL-like equatorial domain superfamily||Chaperonin TCP-1, conserved site||GroEL-like apical domain superfamily||Chaperonin Cpn60/TCP-1 family||Chaperone tailless complex polypeptide 1 (TCP-1)
hsa_circ_0061394	21	29321220	29327393	+	6173	1629	ENSG00000156273;	exon:29321221-29321514	BACH1	Basic leucine zipper domain, Maf-type||Basic-leucine zipper domain||SKP1/BTB/POZ domain superfamily||BTB/POZ domain||-||Transcription factor, Skn-1-like, DNA-binding domain superfamily
hsa_circ_0061395	21	29326058	29329693	+	3635	1542	ENSG00000156273;	exon:29329487-29329693	BACH1	Basic leucine zipper domain, Maf-type||Basic-leucine zipper domain||SKP1/BTB/POZ domain superfamily||BTB/POZ domain||-||Transcription factor, Skn-1-like, DNA-binding domain superfamily
hsa_circ_0004329	17	30266884	30272899	-	6015	415	ENSG00000108578;	exon:30266885-30266954,exon:30271271-30271388,exon:30272561-30272628,exon:30272741-30272899	BLMH	-||Papain-like cysteine peptidase superfamily||Peptidase C1B, bleomycin hydrolase||Cysteine peptidase, cysteine active site
hsa_circ_0004322	22	20091434	20094795	+	3361	482	ENSG00000128191;	exon:20091435-20091632,exon:20092809-20092907,exon:20094713-20094795	DGCR8	Microprocessor complex subunit DGCR8||-||WW domain superfamily||Double-stranded RNA-binding domain||WW domain
hsa_circ_0004320	1	35097316	35110447	+	13131	792	ENSG00000197056;	exon:35097317-35097566,exon:35110294-35110447	ZMYM1	Domain of unknown function DUF4371||HAT, C-terminal dimerisation domain||Zinc finger, MYM-type||TRASH domain||Ribonuclease H-like superfamily
hsa_circ_0004321	19	40736985	40737769	+	784	174	ENSG00000086544;	exon:40736986-40737087,exon:40737698-40737769	ITPKC	Inositol polyphosphate kinase||-||Inositol polyphosphate kinase superfamily
hsa_circ_0004327	6	144487547	144511123	+	23576	1122	ENSG00000152818;	exon:144487548-144487697,exon:144510944-144511123	UTRN	Actinin-type actin-binding domain, conserved site||EF-hand domain, type 2||Zinc finger, ZZ-type||Dystrophin/utrophin||WW domain||EF-hand domain pair||EF-hand domain, type 1||Spectrin/alpha-actinin||CH domain superfamily||Calponin homology domain||WW domain superfamily||-||Spectrin repeat
hsa_circ_0004325	6	155164414	155165409	+	995	333	ENSG00000146426;	exon:155164415-155164600	TIAM2	Raf-like Ras-binding||-||Dbl homology (DH) domain superfamily||PH-like domain superfamily||Guanine-nucleotide dissociation stimulator, CDC24, conserved site||TIAM1, CC-Ex domain||Pleckstrin homology domain||PDZ superfamily||PDZ domain||Dbl homology (DH) domain
hsa_circ_0011523	1	35097316	35104769	+	7453	638	ENSG00000197056;	exon:35104557-35104769	ZMYM1	Domain of unknown function DUF4371||HAT, C-terminal dimerisation domain||Zinc finger, MYM-type||TRASH domain||Ribonuclease H-like superfamily
novel_circ_0030282	5	119110150	119119004	+	8854	132	ENSG00000172869;	exon:119110151-119110283	DMXL1	WD40/YVTN repeat-like-containing domain superfamily||WD40-repeat-containing domain||WD40 repeat||WD40-repeat-containing domain superfamily||RAVE complex protein Rav1 C-terminal
hsa_circ_0066540	3	72792915	72812794	-	19879	245	ENSG00000144736;	exon:72792916-72793036,exon:72812671-72812794	SHQ1	Shq1 protein domain||CS domain||HSP20-like chaperone||-||Protein Shq1
novel_circ_0030281	5	119110150	119116336	+	6186	376	ENSG00000172869;	exon:119110151-119110283,exon:119114475-119114541,exon:119116158-119116336	DMXL1	WD40/YVTN repeat-like-containing domain superfamily||WD40-repeat-containing domain||WD40 repeat||WD40-repeat-containing domain superfamily||RAVE complex protein Rav1 C-terminal
novel_circ_0030286	5	119477416	119496646	+	19230	315	ENSG00000133835;	exon:119477417-119477501,exon:119493818-119493946,exon:119496543-119496646	HSD17B4	Short-chain dehydrogenase/reductase SDR||NAD(P)-binding domain superfamily||N-terminal of MaoC-like dehydratase||-||SCP2 sterol-binding domain superfamily||MaoC-like dehydratase domain||HotDog domain superfamily||SCP2 sterol-binding domain||Short-chain dehydrogenase/reductase, conserved site
novel_circ_0030287	5	119477416	119499553	+	22137	271	ENSG00000133835;	exon:119477417-119477501,exon:119478834-119479021	HSD17B4	Short-chain dehydrogenase/reductase SDR||NAD(P)-binding domain superfamily||N-terminal of MaoC-like dehydratase||-||SCP2 sterol-binding domain superfamily||MaoC-like dehydratase domain||HotDog domain superfamily||SCP2 sterol-binding domain||Short-chain dehydrogenase/reductase, conserved site
hsa_circ_0020462	10	127061667	127110354	+	48687	287	ENSG00000150760;	exon:127061668-127061776,exon:127106231-127106301,exon:127110248-127110354	DOCK1	C2 domain superfamily||Dedicator of cytokinesis||DHR-1 domain||SH3-like domain superfamily||Dedicator of cytokinesis, N-terminal domain||Dedicator of cytokinesis, C-terminal||Dedicator of cytokinesis protein 1/5||DHR-2 domain||Armadillo-type fold||SH3 domain
hsa_circ_0020460	10	127052680	127061776	+	9096	244	ENSG00000150760;	exon:127052681-127052815,exon:127061668-127061776	DOCK1	C2 domain superfamily||Dedicator of cytokinesis||DHR-1 domain||SH3-like domain superfamily||Dedicator of cytokinesis, N-terminal domain||Dedicator of cytokinesis, C-terminal||Dedicator of cytokinesis protein 1/5||DHR-2 domain||Armadillo-type fold||SH3 domain
hsa_circ_0020467	10	127106230	127127764	+	21534	402	ENSG00000150760;	exon:127106231-127106301	DOCK1	C2 domain superfamily||Dedicator of cytokinesis||DHR-1 domain||SH3-like domain superfamily||Dedicator of cytokinesis, N-terminal domain||Dedicator of cytokinesis, C-terminal||Dedicator of cytokinesis protein 1/5||DHR-2 domain||Armadillo-type fold||SH3 domain
hsa_circ_0005059	2	240552913	240555055	-	2142	334	ENSG00000144504;	exon:240552914-240553057,exon:240554866-240555055	ANKMY1	Ankyrin repeat-containing domain||Zinc finger, MYND-type||Ankyrin repeat-containing domain superfamily||MORN motif||Ankyrin repeat||-
novel_circ_0017224	1	220136808	220139139	+	2331	358	ENSG00000067704;	exon:220136809-220136911,exon:220137918-220138043,exon:220139008-220139139	IARS2	Isoleucyl tRNA synthetase type 1, anticodon-binding domain||Zinc finger, FPG/IleRS-type||Aminoacyl-tRNA synthetase, class Ia, anticodon-binding||Rossmann-like alpha/beta/alpha sandwich fold||Isoleucine-tRNA ligase||Valyl/Leucyl/Isoleucyl-tRNA synthetase, editing domain||Aminoacyl-tRNA synthetase, class I, conserved site||Aminoacyl-tRNA synthetase, class Ia||Methionyl/Valyl/Leucyl/Isoleucyl-tRNA s…
novel_circ_0017223	1	220114313	220141948	+	27635	145	ENSG00000067704;	exon:220141803-220141948	IARS2	Isoleucyl tRNA synthetase type 1, anticodon-binding domain||Zinc finger, FPG/IleRS-type||Aminoacyl-tRNA synthetase, class Ia, anticodon-binding||Rossmann-like alpha/beta/alpha sandwich fold||Isoleucine-tRNA ligase||Valyl/Leucyl/Isoleucyl-tRNA synthetase, editing domain||Aminoacyl-tRNA synthetase, class I, conserved site||Aminoacyl-tRNA synthetase, class Ia||Methionyl/Valyl/Leucyl/Isoleucyl-tRNA s…
hsa_circ_0005051	3	196391812	196393619	-	1807	179	ENSG00000163960;	exon:196391813-196391925,exon:196393554-196393619	UBXN7	UBA-like superfamily||UAS||-||Thioredoxin-like superfamily||Ubiquitin-like domain superfamily||UBX domain||UBX domain-containing protein 2/7
hsa_circ_0005050	2	61485767	61490776	-	5009	621	ENSG00000082898;	exon:61485768-61485962,exon:61490642-61490776	XPO1	Exportin-1, repeat 2||Armadillo-like helical||Importin-beta, N-terminal domain||Exportin-1/Importin-beta-like||Chromosome region maintenance repeat||Exportin-1, repeat 3||-||Armadillo-type fold||Exportin-1, C-terminal
hsa_circ_0005057	1	32938396	32949774	-	11378	1110	ENSG00000116514;	exon:32938397-32938528,exon:32949569-32949774	RNF19B	E3 ubiquitin ligase RBR family||Zinc finger, RING-type||IBR domain||Zinc finger, RING/FYVE/PHD-type
hsa_circ_0005054	15	32857014	32902040	-	45026	551	ENSG00000248905;	exon:32857015-32857107,exon:32888172-32888292,exon:32898834-32898893,exon:32901911-32902040	FMN1	Formin, FH2 domain||Formin homology family, Cappuccino subfamily||-
novel_circ_0017221	1	220114313	220125339	+	11026	262	ENSG00000067704;	exon:220114314-220114474,exon:220125237-220125339	IARS2	Isoleucyl tRNA synthetase type 1, anticodon-binding domain||Zinc finger, FPG/IleRS-type||Aminoacyl-tRNA synthetase, class Ia, anticodon-binding||Rossmann-like alpha/beta/alpha sandwich fold||Isoleucine-tRNA ligase||Valyl/Leucyl/Isoleucyl-tRNA synthetase, editing domain||Aminoacyl-tRNA synthetase, class I, conserved site||Aminoacyl-tRNA synthetase, class Ia||Methionyl/Valyl/Leucyl/Isoleucyl-tRNA s…
hsa_circ_0015196	1	171512031	171522259	+	10228	884	ENSG00000117523;	exon:171512032-171512200,exon:171522177-171522259	PRRC2C	BAT2, N-terminal||Protein PRRC2
novel_circ_0034943	7	157201720	157225539	+	23819	243	ENSG00000009335;	exon:157201721-157201807,exon:157207398-157207555	UBE3C	-||HECT domain||IQ motif, EF-hand binding site||HECT, E3 ligase catalytic domain
novel_circ_0034942	7	157201720	157216971	+	15251	190	ENSG00000009335;	exon:157201721-157201807,exon:157216867-157216971	UBE3C	-||HECT domain||IQ motif, EF-hand binding site||HECT, E3 ligase catalytic domain
novel_circ_0034945	7	157207397	157225539	+	18142	289	ENSG00000009335;	exon:157207398-157207555,exon:157225407-157225539	UBE3C	-||HECT domain||IQ motif, EF-hand binding site||HECT, E3 ligase catalytic domain
novel_circ_0034947	7	157220688	157225539	+	4851	346	ENSG00000009335;	exon:157220689-157220806,exon:157223254-157223351,exon:157225407-157225539	UBE3C	-||HECT domain||IQ motif, EF-hand binding site||HECT, E3 ligase catalytic domain
novel_circ_0026797	3	196814450	196820567	+	6117	290	ENSG00000180370;	exon:196814451-196814568,exon:196820394-196820567	PAK2	CRIB domain superfamily||Serine/threonine-protein kinase, active site||Serine/threonine-protein kinase PAK2||p21-activated kinase 2, catalytic domain||p21 activated kinase binding domain||Protein kinase, ATP binding site||Protein kinase domain||Protein kinase-like domain superfamily||CRIB domain
novel_circ_0026796	3	196812218	196814568	+	2350	165	ENSG00000180370;	exon:196812219-196812267,exon:196814451-196814568	PAK2	CRIB domain superfamily||Serine/threonine-protein kinase, active site||Serine/threonine-protein kinase PAK2||p21-activated kinase 2, catalytic domain||p21 activated kinase binding domain||Protein kinase, ATP binding site||Protein kinase domain||Protein kinase-like domain superfamily||CRIB domain
novel_circ_0026795	3	196806578	196820567	+	13989	107	ENSG00000180370;	exon:196806579-196806686	PAK2	CRIB domain superfamily||Serine/threonine-protein kinase, active site||Serine/threonine-protein kinase PAK2||p21-activated kinase 2, catalytic domain||p21 activated kinase binding domain||Protein kinase, ATP binding site||Protein kinase domain||Protein kinase-like domain superfamily||CRIB domain
novel_circ_0026794	3	196806578	196818156	+	11578	107	ENSG00000180370;	exon:196806579-196806686	PAK2	CRIB domain superfamily||Serine/threonine-protein kinase, active site||Serine/threonine-protein kinase PAK2||p21-activated kinase 2, catalytic domain||p21 activated kinase binding domain||Protein kinase, ATP binding site||Protein kinase domain||Protein kinase-like domain superfamily||CRIB domain
novel_circ_0026799	3	196820370	196827333	+	6963	333	ENSG00000180370;	exon:196820371-196820567,exon:196827196-196827333	PAK2	CRIB domain superfamily||Serine/threonine-protein kinase, active site||Serine/threonine-protein kinase PAK2||p21-activated kinase 2, catalytic domain||p21 activated kinase binding domain||Protein kinase, ATP binding site||Protein kinase domain||Protein kinase-like domain superfamily||CRIB domain
hsa_circ_0084677	8	67118247	67132080	+	13833	331	ENSG00000104218;	exon:67118248-67118369,exon:67118743-67118821,exon:67131951-67132080	CSPP1	Centrosome and spindle pole associated protein 1||-
hsa_circ_0084678	8	67118247	67137603	+	19356	479	ENSG00000104218;	exon:67118248-67118369,exon:67118743-67118821,exon:67137456-67137603	CSPP1	Centrosome and spindle pole associated protein 1||-
hsa_circ_0084679	8	67118247	67149935	+	31688	632	ENSG00000104218;	exon:67118248-67118369,exon:67149783-67149935	CSPP1	Centrosome and spindle pole associated protein 1||-
novel_circ_0032626	6	135318518	135346796	-	28278	380	ENSG00000135541;	intron:135318519-135318616,intron:135323162-135323324,intron:135346675-135346796	AHI1	WD40-repeat-containing domain superfamily||SH3-like domain superfamily||WD40/YVTN repeat-like-containing domain superfamily||WD40 repeat||WD40-repeat-containing domain||SH3 domain||Jouberin, SH3 domain||-
hsa_circ_0091671	X	149490313	149501037	-	10724	588	ENSG00000241489;ENSG00000010404;	exon:149490314-149490440,exon:149500949-149501037	AC244197.3;IDS	-
novel_circ_0032620	6	135290422	135323324	-	32902	160	ENSG00000135541;	exon:135290423-135290525,exon:135300500-135300558	AHI1	WD40-repeat-containing domain superfamily||SH3-like domain superfamily||WD40/YVTN repeat-like-containing domain superfamily||WD40 repeat||WD40-repeat-containing domain||SH3 domain||Jouberin, SH3 domain||-
hsa_circ_0002584	12	112319224	112319742	-	518	518	ENSG00000173064;	exon:112319225-112319742	HECTD4	HECTD4, SPRY domain||HECT, E3 ligase catalytic domain||HECT domain||-
hsa_circ_0082633	7	139083779	139089759	-	5980	389	ENSG00000105939;	exon:139083780-139084032,exon:139089624-139089759	ZC3HAV1	Poly(ADP-ribose) polymerase, catalytic domain||WWE domain superfamily||Zinc finger, CCCH-type||Winged helix-like DNA-binding domain superfamily||ZAP, helix turn helix N-terminal domain||WWE domain||ZAP, zinc finger
hsa_circ_0002586	4	140535732	140543586	+	7854	565	ENSG00000179387;	exon:140535733-140535830,exon:140537412-140537541,exon:140542574-140542642,exon:140543453-140543586	ELMOD2	ELMO domain||ELMO domain-containing protein 2
hsa_circ_0082631	7	139078551	139080243	-	1692	876	ENSG00000105939;	exon:139078552-139078653	ZC3HAV1	Poly(ADP-ribose) polymerase, catalytic domain||WWE domain superfamily||Zinc finger, CCCH-type||Winged helix-like DNA-binding domain superfamily||ZAP, helix turn helix N-terminal domain||WWE domain||ZAP, zinc finger
hsa_circ_0002580	3	23954536	23959815	+	5279	501	ENSG00000174738;	exon:23959671-23959815	NR1D2	-||Nuclear hormone receptor, ligand-binding domain||Zinc finger, NHR/GATA-type||Zinc finger, nuclear hormone receptor-type||Nuclear hormone receptor-like domain superfamily||Nuclear hormone receptor
hsa_circ_0002582	10	79118914	79216274	+	97360	616	ENSG00000108175;	exon:79118915-79119024,exon:79208336-79208449,exon:79216169-79216274	ZMIZ1	Zinc finger, RING/FYVE/PHD-type||Zinc finger, MIZ-type||Zmiz1, N-terminal tetratricopeptide repeat domain
hsa_circ_0002583	2	28850327	28865119	-	14792	691	ENSG00000171103;	exon:28850328-28850405,exon:28865017-28865119	TRMT61B	S-adenosyl-L-methionine-dependent methyltransferase||tRNA (1-methyladenosine) methyltransferase catalytic subunit Gcd14||-
novel_circ_0023679	2	32575155	32594060	+	18905	145	ENSG00000115760;	exon:32593915-32594060	BIRC6	BIR repeat||-||Ubiquitin-conjugating enzyme E2||Baculoviral IAP repeat-containing protein 6||Ubiquitin-conjugating enzyme/RWD-like
novel_circ_0005949	12	92798891	92799086	-	195	194	ENSG00000102189;	exon:92798892-92799086	EEA1	Zinc finger, RING/FYVE/PHD-type||FYVE zinc finger||-||Zinc finger, FYVE-related||Zinc finger C2H2-type||Zinc finger, FYVE/PHD-type
hsa_circ_0075501	6	3283851	3298218	-	14367	621	ENSG00000137266;	exon:3283852-3283975,exon:3285079-3285111	SLC22A23	-||Sugar transporter, conserved site||MFS transporter superfamily||Major facilitator superfamily domain||Major facilitator, sugar transporter-like
novel_circ_0023670	2	32509737	32513154	+	3417	221	ENSG00000115760;	exon:32512933-32513154	BIRC6	BIR repeat||-||Ubiquitin-conjugating enzyme E2||Baculoviral IAP repeat-containing protein 6||Ubiquitin-conjugating enzyme/RWD-like
hsa_circ_0005581	5	14290715	14304592	+	13877	960	ENSG00000038382;	exon:14304461-14304592	TRIO	Triple functional domain protein||Immunoglobulin-like fold||SH3 domain||Protein kinase domain||Immunoglobulin subtype||Immunoglobulin I-set||SH3-like domain superfamily||Spectrin repeat||-||Serine/threonine-protein kinase, active site||Dbl homology (DH) domain superfamily||PH-like domain superfamily||Spectrin/alpha-actinin||Protein kinase-like domain superfamily||CRAL-TRIO lipid binding domain||D…
hsa_circ_0005580	11	108094390	108095691	+	1301	462	ENSG00000166266;	exon:108094391-108094514,exon:108094812-108094987,exon:108095530-108095691	CUL5	Cullin protein, neddylation domain||Cullin homology domain||-||Cullin repeat-like-containing domain superfamily||Cullin, conserved site||Cullin homology domain superfamily||Winged helix DNA-binding domain superfamily||Winged helix-like DNA-binding domain superfamily||Cullin, N-terminal
hsa_circ_0005583	11	108301647	108304852	+	3205	497	ENSG00000149311;	exon:108301648-108301789,exon:108302853-108303029,exon:108304675-108304852	ATM	Armadillo-type fold||Phosphatidylinositol 3/4-kinase, conserved site||Telomere-length maintenance and DNA damage repair||Serine/threonine-protein kinase ATM/Tel1||FATC domain||Phosphatidylinositol 3-/4-kinase, catalytic domain||Phosphatidylinositol 3-/4-kinase, catalytic domain superfamily||-||PIK-related kinase||PIK-related kinase, FAT||Protein kinase-like domain superfamily
hsa_circ_0005582	16	23621361	23623130	-	1769	279	ENSG00000083093;	exon:23621362-23621478,exon:23622969-23623130	PALB2	Partner and localiser of BRCA2, WD40 domain||WD40-repeat-containing domain superfamily||-||WD40/YVTN repeat-like-containing domain superfamily
hsa_circ_0005585	5	43675510	43704400	+	28890	623	ENSG00000112992;	exon:43675511-43675670,exon:43677725-43677806,exon:43702621-43702736,exon:43704255-43704400	NNT	DHS-like NAD/FAD-binding domain superfamily||Alanine dehydrogenase/pyridine nucleotide transhydrogenase, conserved site-2||-||NADP transhydrogenase beta-like domain||NAD(P)-binding domain superfamily||Alanine dehydrogenase/NAD(P) transhydrogenase, conserved site-1||NAD(P) transhydrogenase, alpha subunit||Alanine dehydrogenase/pyridine nucleotide transhydrogenase, NAD(H)-binding domain||Alanine de…
hsa_circ_0005584	18	54159764	54205157	-	45393	706	ENSG00000134046;	exon:54159765-54159903,exon:54204998-54205157	MBD2	Methyl-CpG binding protein 2/3, C-terminal domain||Methyl-CpG-binding domain protein 2/3, p55-binding region||Methyl-CpG DNA binding||-||DNA-binding domain superfamily
hsa_circ_0005586	4	39224883	39240334	+	15451	942	ENSG00000157796;	exon:39224884-39225033,exon:39228210-39228357,exon:39234766-39234875,exon:39240277-39240334	WDR19	Tetratricopeptide-like helical domain superfamily||WD40 repeat||WD40-repeat-containing domain||WDR19, WD40 repeat||-||WD repeat-containing protein 19/dyf-2||WD40-repeat-containing domain superfamily||Anaphase-promoting complex subunit 4, WD40 domain||WD40/YVTN repeat-like-containing domain superfamily
hsa_circ_0005589	11	118583808	118584644	+	836	371	ENSG00000095139;	exon:118583809-118584014,exon:118584480-118584644	ARCN1	Longin-like domain superfamily||AP-2 complex subunit mu, C-terminal superfamily||Coatomer delta subunit||AP complex, mu/sigma subunit||Mu homology domain
hsa_circ_0005588	7	73686635	73687095	+	460	276	ENSG00000071462;	exon:73686636-73686731,exon:73686818-73686900,exon:73686999-73687095	BUD23	S-adenosyl-L-methionine-dependent methyltransferase||18S rRNA (guanine(1575)-N(7))-methyltransferase Bud23-like||Methyltransferase domain 25||18S rRNA (guanine(1575)-N(7))-methyltransferase Bud23, C-terminal||-||Methyltransferase type 11
novel_circ_0017084	1	212329134	212357284	+	28150	262	ENSG00000066027;	exon:212329135-212329270,exon:212357157-212357284	PPP2R5A	Protein phosphatase 2A, regulatory B subunit, B56||Armadillo-like helical||Armadillo-type fold
hsa_circ_0017695	10	11747348	11755608	+	8260	421	ENSG00000134463;	exon:11749495-11749592,exon:11755408-11755608	ECHDC3	Enoyl-CoA hydratase/isomerase||ClpP/crotonase-like domain superfamily||Enoyl-CoA hydratase, C-terminal
novel_circ_0017111	1	213061381	213077816	+	16435	265	ENSG00000136643;	intron:213061382-213061527,intron:213077696-213077816	RPS6KC1	RPK118-like, kinase domain||Phox homologous domain||MIT||MIT domain superfamily||Protein kinase-like domain superfamily||PX domain superfamily||Protein kinase domain
novel_circ_0017118	1	213077695	213104569	+	26874	303	ENSG00000136643;	exon:213077696-213077816,exon:213087962-213088030,exon:213104454-213104569	RPS6KC1	RPK118-like, kinase domain||Phox homologous domain||MIT||MIT domain superfamily||Protein kinase-like domain superfamily||PX domain superfamily||Protein kinase domain
hsa_circ_0002052	9	116207455	116235637	+	28182	1254	ENSG00000182752;	exon:116207456-116207601	PAPPA	Sushi/SCR/CCP domain||Concanavalin A-like lectin/glucanase domain superfamily||Sushi/SCR/CCP superfamily||LamG-like jellyroll fold||Notch domain||Metallopeptidase, catalytic domain superfamily||Peptidase M43, pregnancy-associated plasma-A||Myxococcus cysteine-rich repeat||Pappalysin-1
hsa_circ_0002050	10	127031649	127037816	+	6167	386	ENSG00000150760;	exon:127031650-127031753,exon:127032137-127032320,exon:127037719-127037816	DOCK1	C2 domain superfamily||Dedicator of cytokinesis||DHR-1 domain||SH3-like domain superfamily||Dedicator of cytokinesis, N-terminal domain||Dedicator of cytokinesis, C-terminal||Dedicator of cytokinesis protein 1/5||DHR-2 domain||Armadillo-type fold||SH3 domain
hsa_circ_0002051	5	179709872	179720560	+	10688	654	ENSG00000127022;	exon:179709873-179710065,exon:179716105-179716294,exon:179719668-179719781,exon:179720404-179720560	CANX	Concanavalin A-like lectin/glucanase domain superfamily||Calreticulin/calnexin, conserved site||-||Calreticulin/calnexin, P domain superfamily||Calreticulin/calnexin
hsa_circ_0002056	17	64786566	64797409	-	10843	562	ENSG00000214176;	exon:64786567-64786724	--	-
novel_circ_0005943	12	92268920	92288607	-	19687	339	ENSG00000277851;	intron:92268921-92268979,intron:92272522-92272616,intron:92286322-92286386,intron:92288484-92288607	--	-
hsa_circ_0002058	11	61366044	61367998	+	1954	248	ENSG00000149483;	exon:61366045-61366216,exon:61367428-61367525,exon:61367923-61367998	TMEM138	Transmembrane protein 138
hsa_circ_0002059	1	117460488	117502970	+	42482	843	ENSG00000198162;	exon:117460489-117460612,exon:117466334-117466427,exon:117499382-117499554,exon:117502855-117502970	MAN1A2	Glycoside hydrolase family 47||Six-hairpin glycosidase-like superfamily||Seven-hairpin glycosidases
hsa_circ_0088390	9	122877470	122897576	-	20106	1392	ENSG00000056586;	exon:122877471-122877583,exon:122879755-122879873	RC3H2	Zinc finger, RING/FYVE/PHD-type||Zinc finger, RING-type||Zinc finger, CCCH-type superfamily||Zinc finger, CCCH-type||Zinc finger, RING-type, conserved site||Roquin-2||Roquin II||-||RING-type zinc-finger, LisH dimerisation motif
hsa_circ_0088397	9	122892908	122897576	-	4668	416	ENSG00000056586;	exon:122892909-122893026,exon:122897279-122897576	RC3H2	Zinc finger, RING/FYVE/PHD-type||Zinc finger, RING-type||Zinc finger, CCCH-type superfamily||Zinc finger, CCCH-type||Zinc finger, RING-type, conserved site||Roquin-2||Roquin II||-||RING-type zinc-finger, LisH dimerisation motif
hsa_circ_0088396	9	122890311	122897576	-	7265	650	ENSG00000056586;	exon:122897279-122897576	RC3H2	Zinc finger, RING/FYVE/PHD-type||Zinc finger, RING-type||Zinc finger, CCCH-type superfamily||Zinc finger, CCCH-type||Zinc finger, RING-type, conserved site||Roquin-2||Roquin II||-||RING-type zinc-finger, LisH dimerisation motif
hsa_circ_0012185	1	44874677	44875695	-	1018	227	ENSG00000070785;	exon:44874678-44874826,exon:44875618-44875695	EIF2B3	Trimeric LpxA-like superfamily||Nucleotide-diphospho-sugar transferases||-||Nucleotidyl transferase domain
hsa_circ_0012186	1	44874677	44881739	-	7062	546	ENSG00000070785;	exon:44874678-44874826,exon:44881612-44881739	EIF2B3	Trimeric LpxA-like superfamily||Nucleotide-diphospho-sugar transferases||-||Nucleotidyl transferase domain
novel_circ_0030910	5	158941693	158941979	-	286	285	ENSG00000164330;	intron:158941694-158941979	EBF1	Transcription factor COE, DNA-binding domain||Helix-loop-helix DNA-binding domain superfamily||Transcription factor COE, DNA-binding domain superfamily||Immunoglobulin E-set||IPT domain||Transcription factor COE||Immunoglobulin-like fold||Transcription factor COE, IPT domain||Transcription factor COE, conserved site||Transcription factor COE, helix-loop-helix domain
novel_circ_0020328	21	28577218	28626676	-	49458	322	ENSG00000232855;	exon:28577219-28577380,exon:28578357-28578427,exon:28626585-28626676	--	-
novel_circ_0020329	21	28941219	28947606	-	6387	142	ENSG00000198862;	exon:28947464-28947606	LTN1	Zinc finger, RING/FYVE/PHD-type||Zinc finger, RING-CH-type||Armadillo-like helical||E3 ubiquitin-protein ligase listerin||Zinc finger, RING-type||Armadillo-type fold||Listerin, zinc finger, RING-type||-
novel_circ_0030915	5	159573186	159577046	+	3860	323	ENSG00000249738;	intron:159576308-159576431,intron:159576846-159577046	--	-
novel_circ_0020325	21	28417074	28431259	-	14185	154	ENSG00000232855;	exon:28431105-28431259	--	-
novel_circ_0020326	21	28417074	28446472	-	29398	229	ENSG00000232855;	exon:28444148-28444195,exon:28446290-28446472	--	-
novel_circ_0030919	5	160010499	160049662	+	39163	112	ENSG00000113312;	exon:160036691-160036803	TTC1	Tetratricopeptide repeat-containing domain||Tetratricopeptide repeat||Tetratricopeptide repeat 1||Tetratricopeptide-like helical domain superfamily
novel_circ_0020320	21	28212239	28228478	-	16239	280	ENSG00000236532;	exon:28212240-28212351,exon:28217178-28217347	--	-
novel_circ_0020322	21	28377945	28431259	-	53314	217	ENSG00000232855;	intron:28377946-28378009,intron:28431105-28431259	--	-
hsa_circ_0082096	7	127373341	127377329	-	3988	1837	ENSG00000048405;	exon:127377186-127377329	ZNF800	Zinc-finger C2H2-type 11||Zinc finger C2H2-type||Zinc finger protein 800||Zinc finger C2H2 superfamily
hsa_circ_0057262	2	182934751	182953331	-	18580	706	ENSG00000061676;	exon:182953113-182953331	NCKAP1	Nck-associated protein 1
hsa_circ_0058528	2	227531090	227536993	+	5903	756	ENSG00000173744;	exon:227534845-227534877,exon:227536625-227536704,exon:227536901-227536993	AGFG1	ArfGAP domain superfamily||Arf GTPase activating protein||ARFGAP/RecO-like zinc finger||-
hsa_circ_0058520	2	227519947	227524915	+	4968	433	ENSG00000173744;	exon:227519948-227520063	AGFG1	ArfGAP domain superfamily||Arf GTPase activating protein||ARFGAP/RecO-like zinc finger||-
novel_circ_0035395	7	36410513	36443862	+	33349	297	ENSG00000011426;	exon:36410514-36410704,exon:36411059-36411166	ANLN	Anillin, N-terminal domain||-||PH-like domain superfamily||Anillin, PH domain||Anillin homology domain||Pleckstrin homology domain
novel_circ_0035393	7	36406180	36411166	+	4986	297	ENSG00000011426;	exon:36410514-36410704,exon:36411059-36411166	ANLN	Anillin, N-terminal domain||-||PH-like domain superfamily||Anillin, PH domain||Anillin homology domain||Pleckstrin homology domain
novel_circ_0035392	7	36399078	36415884	+	16806	547	ENSG00000011426;	exon:36399079-36399393,exon:36411059-36411166,exon:36415758-36415884	ANLN	Anillin, N-terminal domain||-||PH-like domain superfamily||Anillin, PH domain||Anillin homology domain||Pleckstrin homology domain
novel_circ_0035399	7	36861658	36878117	-	16459	266	ENSG00000155849;	exon:36861659-36861736,exon:36870393-36870475,exon:36878010-36878117	ELMO1	ELMO domain||Domain of unknown function DUF3361||Pleckstrin homology domain||Armadillo-like helical||PH-like domain superfamily||Engulfment and cell motility protein 1||-||Armadillo-type fold
hsa_circ_0006779	15	89247628	89260843	+	13215	307	ENSG00000140525;	exon:89247629-89247726,exon:89258704-89258776,exon:89260713-89260843	FANCI	Fanconi anemia group I protein||-||FANCI solenoid 2 domain||FANCI solenoid 1 domain||FANCI solenoid 4 domain||FANCI helical domain 2||FANCI helical domain 1||FANCI solenoid 3 domain||FANCI solenoid 1 cap
hsa_circ_0006778	13	19772241	19782791	-	10550	708	ENSG00000121390;	exon:19772242-19772543	PSPC1	-||PSP1, RNA recognition motif 1||NOPS||PSP1, RNA recognition motif 2||RNA recognition motif domain||Nucleotide-binding alpha-beta plait domain superfamily||RNA-binding domain superfamily
novel_circ_0019428	20	13616856	13630152	-	13296	218	ENSG00000089123;	exon:13629934-13630152	TASP1	Nucleophile aminohydrolases, N-terminal||Threonine aspartase 1||Peptidase T2, asparaginase 2
hsa_circ_0006773	7	27629370	27649633	-	20263	393	ENSG00000106049;	exon:27629371-27629492,exon:27632336-27632445,exon:27636676-27636737,exon:27647152-27647281,exon:27648548-27648644,exon:27649473-27649633	HIBADH	3-hydroxyisobutyrate dehydrogenase, NAD-binding domain||6-phosphogluconate dehydrogenase, domain 2||3-hydroxyisobutyrate dehydrogenase-related||6-phosphogluconate dehydrogenase, NADP-binding||3-hydroxyisobutyrate dehydrogenase-related, conserved site||3-hydroxyisobutyrate dehydrogenase||6-phosphogluconate dehydrogenase-like, C-terminal domain superfamily||-||NAD(P)-binding domain superfamily
hsa_circ_0006771	7	128574719	128592017	+	17298	284	ENSG00000280828;	exon:128574720-128574791,exon:128591850-128592017	--	-
novel_circ_0019423	20	13569506	13630152	-	60646	381	ENSG00000089123;	exon:13569507-13569586,exon:13580897-13580981,exon:13629934-13630152	TASP1	Nucleophile aminohydrolases, N-terminal||Threonine aspartase 1||Peptidase T2, asparaginase 2
hsa_circ_0006774	2	216678111	216679079	-	968	350	ENSG00000115461;	exon:216678112-216678231,exon:216678850-216679079	IGFBP5	Insulin-like growth factor-binding protein, IGFBP||Insulin-like growth factor binding protein 5||Growth factor receptor cysteine-rich domain superfamily||Insulin-like growth factor binding protein||Insulin-like growth factor binding protein, N-terminal, Cys-rich conserved site||Thyroglobulin type-1||Insulin-like growth factor-binding protein family 1-6, chordata||Thyroglobulin type-1 superfamily
hsa_circ_0046808	18	8085670	8088851	+	3181	305	ENSG00000173482;	exon:8085671-8085872,exon:8088749-8088851	PTPRM	Fibronectin type III||Concanavalin A-like lectin/glucanase domain superfamily||Protein-tyrosine phosphatase, catalytic||PTP type protein phosphatase||Immunoglobulin-like domain||Protein-tyrosine phosphatase, active site||Fibronectin type III superfamily||Immunoglobulin-like domain superfamily||Immunoglobulin subtype||Immunoglobulin-like fold||Immunoglobulin||Protein-tyrosine phosphatase-like||-||…
novel_circ_0016642	1	183116576	183118146	+	1570	210	ENSG00000135862;	exon:183116577-183116675,exon:183118034-183118146	LAMC1	Laminin, N-terminal||Laminin EGF domain||Laminin IV||EGF-like domain||Laminin, N-terminal domain superfamily
novel_circ_0016643	1	183133405	183135156	+	1751	407	ENSG00000135862;	exon:183133406-183133550,exon:183134660-183134809,exon:183135042-183135156	LAMC1	Laminin, N-terminal||Laminin EGF domain||Laminin IV||EGF-like domain||Laminin, N-terminal domain superfamily
novel_circ_0016646	1	183512836	183517820	+	4984	280	ENSG00000116698;	exon:183512837-183512868,exon:183515874-183515991,exon:183517688-183517820	SMG7	-||DNA/RNA-binding domain, Est1-type||Telomerase activating protein Est1||Tetratricopeptide-like helical domain superfamily
novel_circ_0016647	1	183526595	183533832	+	7237	242	ENSG00000116698;	exon:183526596-183526767,exon:183527956-183528027	SMG7	-||DNA/RNA-binding domain, Est1-type||Telomerase activating protein Est1||Tetratricopeptide-like helical domain superfamily
hsa_circ_0007210	3	125848229	125848447	-	218	218	ENSG00000241288;	exon:125848230-125848447	--	-
hsa_circ_0008609	2	99194750	99195756	+	1006	405	ENSG00000241962;	exon:99194751-99194897,exon:99195573-99195756	AC079447.1	-
hsa_circ_0008608	8	94885066	94885558	-	492	231	ENSG00000175305;	exon:94885067-94885201,exon:94885463-94885558	CCNE2	Cyclin-like superfamily||Cyclin||Cyclin E||Cyclin, C-terminal domain||-||Cyclin, N-terminal||Cyclin-like
hsa_circ_0008605	17	2236491	2244719	-	8228	208	ENSG00000070366;	exon:2236492-2236637,exon:2239615-2239712,exon:2244658-2244719	SMG6	PIN domain||Tetratricopeptide-like helical domain superfamily||PIN-like domain superfamily||Telomerase activating protein Est1||DNA/RNA-binding domain, Est1-type
hsa_circ_0008606	1	77858937	77864028	+	5091	513	ENSG00000180488;	exon:77858938-77859056,exon:77861224-77861322,exon:77863894-77864028	MIGA1	-||Mitoguardin
hsa_circ_0008601	17	44859079	44860543	-	1464	355	ENSG00000108883;	exon:44859905-44860045,exon:44860432-44860543	EFTUD2	Elongation Factor G, domain II||Elongation factor EFG, domain V-like||Transcription factor, GTP-binding domain||EF-G domain III/V-like||Ribosomal protein S5 domain 2-type fold, subgroup||-||Translation elongation factor EFG/EF2, domain IV||Small GTP-binding protein domain||Translation protein, beta-barrel domain superfamily||116kDa U5 small nuclear ribonucleoprotein component, N-terminal||116kDa …
hsa_circ_0008603	17	19651546	19671956	+	20410	1290	ENSG00000072210;	exon:19651547-19651778,exon:19671721-19671956	ALDH3A2	Aldehyde dehydrogenase domain||Aldehyde dehydrogenase, N-terminal||Aldehyde dehydrogenase, C-terminal||Aldehyde dehydrogenase NAD(P)-dependent||-||Aldehyde/histidinol dehydrogenase||Aldehyde dehydrogenase, cysteine active site||Aldehyde dehydrogenase, glutamic acid active site
hsa_circ_0003729	12	51986817	51991993	+	5176	256	ENSG00000135503;	exon:51986818-51986942,exon:51991863-51991993	ACVR1B	Serine/threonine-protein kinase, active site||Protein kinase-like domain superfamily||Protein kinase domain||Ser/Thr protein kinase, TGFB receptor||GS domain||Protein kinase, ATP binding site||Activin types I and II receptor domain
hsa_circ_0003728	9	128267457	128268524	-	1067	273	ENSG00000167110;	exon:128267458-128267517,exon:128267934-128267997,exon:128268117-128268160,exon:128268420-128268524	GOLGA2	Golgin subfamily A||Golgin subfamily A member 6-like
novel_circ_0018778	1	61856029	61901459	+	45430	386	ENSG00000132849;	exon:61856030-61856239,exon:61901282-61901459	PATJ	PDZ superfamily||-||PDZ domain||L27-2||L27 domain superfamily||L27 domain
hsa_circ_0003723	22	41264663	41281082	-	16419	518	ENSG00000100401;	exon:41264664-41264843,exon:41280933-41281082	RANGAP1	Leucine-rich repeat domain superfamily||-||Ran-GTPase activating protein 1, C-terminal domain superfamily||Ran-GTPase activating protein 1, C-terminal||Leucine-rich repeat
hsa_circ_0003721	5	131716564	131744690	-	28126	530	ENSG00000217128;	exon:131719317-131719417,exon:131730904-131731038,exon:131744564-131744690	FNIP1	Folliculin-interacting protein, middle domain||Folliculin-interacting protein family||Folliculin-interacting protein, C-terminal domain||Tripartite DENN domain, FNIP1/2-type||Folliculin-interacting protein, N-terminal domain
hsa_circ_0003720	22	24334409	24338477	+	4068	256	ENSG00000100014;ENSG00000258555;	exon:24334410-24334573,exon:24338386-24338477	SPECC1L;SPECC1L-ADORA2A	-
novel_circ_0018770	1	61822944	61833785	+	10841	426	ENSG00000132849;	exon:61822945-61823079,exon:61827422-61827583,exon:61833654-61833785	PATJ	PDZ superfamily||-||PDZ domain||L27-2||L27 domain superfamily||L27 domain
novel_circ_0018772	1	61827421	61884408	+	56987	332	ENSG00000132849;	exon:61827422-61827583,exon:61884237-61884408	PATJ	PDZ superfamily||-||PDZ domain||L27-2||L27 domain superfamily||L27 domain
novel_circ_0025917	3	15563357	15575082	-	11725	374	ENSG00000131373;	exon:15563358-15563544,exon:15573159-15573242,exon:15574977-15575082	HACL1	-||Thiamine pyrophosphate enzyme, N-terminal TPP-binding domain||Thiamine pyrophosphate enzyme, central domain||Thiamin diphosphate-binding fold||Thiamine pyrophosphate enzyme, C-terminal TPP-binding||DHS-like NAD/FAD-binding domain superfamily
novel_circ_0025919	3	15571635	15575082	-	3447	321	ENSG00000131373;	intron:15571636-15571769,intron:15573159-15573242,intron:15574977-15575082	HACL1	-||Thiamine pyrophosphate enzyme, N-terminal TPP-binding domain||Thiamine pyrophosphate enzyme, central domain||Thiamin diphosphate-binding fold||Thiamine pyrophosphate enzyme, C-terminal TPP-binding||DHS-like NAD/FAD-binding domain superfamily
novel_circ_0016398	1	171512031	171527844	+	15813	365	ENSG00000117523;	exon:171512032-171512200,exon:171524821-171524965,exon:171527791-171527844	PRRC2C	BAT2, N-terminal||Protein PRRC2
novel_circ_0016395	1	170719725	170758830	+	39105	294	n/a	intergenic_region:170719726-170719901,intergenic_region:170730277-170730348,intergenic_region:170758782-170758830	--	-
novel_circ_0016396	1	1712263	1716478	-	4215	132	ENSG00000008128;ENSG00000268575;	exon:1716346-1716478	CDK11A;--	-
novel_circ_0016390	1	170536309	170544845	+	8536	140	ENSG00000120370;	exon:170544705-170544845	GORAB	RAB6-interacting golgin||-
novel_circ_0016392	1	170542490	170552430	+	9940	241	ENSG00000120370;	exon:170542491-170542592,exon:170544705-170544845	GORAB	RAB6-interacting golgin||-
novel_circ_0008300	14	75699187	75720703	+	21516	349	ENSG00000119685;	exon:75699188-75699270,exon:75707018-75707087,exon:75719735-75719826,exon:75720596-75720703	TTLL5	Tubulin-tyrosine ligase/Tubulin polyglutamylase||-||ATP-grasp fold, subdomain 1
novel_circ_0008302	14	75707017	75735289	+	28272	308	ENSG00000119685;	exon:75707018-75707087,exon:75707623-75707707,exon:75733989-75734050,exon:75735195-75735289	TTLL5	Tubulin-tyrosine ligase/Tubulin polyglutamylase||-||ATP-grasp fold, subdomain 1
novel_circ_0008307	14	75766061	75771854	+	5793	426	ENSG00000119685;	exon:75766062-75766368,exon:75771734-75771854	TTLL5	Tubulin-tyrosine ligase/Tubulin polyglutamylase||-||ATP-grasp fold, subdomain 1
novel_circ_0008308	14	75775483	75776850	+	1367	249	ENSG00000119685;	exon:75775484-75775630,exon:75776747-75776850	TTLL5	Tubulin-tyrosine ligase/Tubulin polyglutamylase||-||ATP-grasp fold, subdomain 1
hsa_circ_0042341	17	18340042	18353817	-	13775	718	ENSG00000176974;	exon:18353672-18353817	SHMT1	Pyridoxal phosphate-dependent transferase, major domain||Serine hydroxymethyltransferase-like domain||Pyridoxal phosphate-dependent transferase||-||Serine hydroxymethyltransferase, pyridoxal phosphate binding site||Pyridoxal phosphate-dependent transferase domain 1||Serine hydroxymethyltransferase
novel_circ_0010569	16	15759575	15763891	-	4316	365	ENSG00000133392;	exon:15759576-15759728,exon:15760540-15760658,exon:15763796-15763891	MYH11	Myosin, N-terminal, SH3-like||IQ motif, EF-hand binding site||P-loop containing nucleoside triphosphate hydrolase||-||Kinesin motor domain superfamily||Myosin head, motor domain||Myosin IQ motif-containing domain superfamily||Myosin tail||Myosin S1 fragment, N-terminal
novel_circ_0010568	16	15756340	15763891	-	7551	213	ENSG00000133392;	exon:15760540-15760658,exon:15763796-15763891	MYH11	Myosin, N-terminal, SH3-like||IQ motif, EF-hand binding site||P-loop containing nucleoside triphosphate hydrolase||-||Kinesin motor domain superfamily||Myosin head, motor domain||Myosin IQ motif-containing domain superfamily||Myosin tail||Myosin S1 fragment, N-terminal
novel_circ_0034116	6	87607672	87609229	+	1557	133	ENSG00000135336;	exon:87609096-87609229	ORC3	ORC3, winged helix C-terminal||-||Origin recognition complex, subunit 3
novel_circ_0034117	6	87621353	87636486	+	15133	133	ENSG00000135336;	exon:87621354-87621487	ORC3	ORC3, winged helix C-terminal||-||Origin recognition complex, subunit 3
novel_circ_0034114	6	87605916	87612248	+	6332	263	ENSG00000135336;	exon:87605917-87606021,exon:87612089-87612248	ORC3	ORC3, winged helix C-terminal||-||Origin recognition complex, subunit 3
novel_circ_0010562	16	15738564	15745237	-	6673	123	ENSG00000133392;	exon:15738565-15738688	MYH11	Myosin, N-terminal, SH3-like||IQ motif, EF-hand binding site||P-loop containing nucleoside triphosphate hydrolase||-||Kinesin motor domain superfamily||Myosin head, motor domain||Myosin IQ motif-containing domain superfamily||Myosin tail||Myosin S1 fragment, N-terminal
novel_circ_0010565	16	15741462	15745237	-	3775	445	ENSG00000133392;	exon:15741463-15741669,exon:15741760-15741891,exon:15745129-15745237	MYH11	Myosin, N-terminal, SH3-like||IQ motif, EF-hand binding site||P-loop containing nucleoside triphosphate hydrolase||-||Kinesin motor domain superfamily||Myosin head, motor domain||Myosin IQ motif-containing domain superfamily||Myosin tail||Myosin S1 fragment, N-terminal
novel_circ_0034113	6	87605916	87609229	+	3313	237	ENSG00000135336;	exon:87605917-87606021,exon:87609096-87609229	ORC3	ORC3, winged helix C-terminal||-||Origin recognition complex, subunit 3
hsa_circ_0077519	6	104833041	104843298	-	10257	208	ENSG00000085382;	exon:104833042-104833173,exon:104843223-104843298	HACE1	Ankyrin repeat||Ankyrin repeat-containing domain superfamily||HECT, E3 ligase catalytic domain||Ankyrin repeat-containing domain||-||HECT domain
novel_circ_0034111	6	87601783	87616427	+	14644	210	ENSG00000135336;	exon:87601784-87601881,exon:87616314-87616427	ORC3	ORC3, winged helix C-terminal||-||Origin recognition complex, subunit 3
novel_circ_0019280	1	93322872	93325895	-	3023	291	ENSG00000223745;	intron:93322873-93322944,intron:93324635-93324729,intron:93325769-93325895	--	-
novel_circ_0021769	2	147972738	147982077	-	9339	388	ENSG00000115947;	exon:147972739-147972829,exon:147973448-147973524,exon:147975902-147975975,exon:147981928-147982077	ORC4	Origin recognition complex subunit 4||ATPase, AAA-type, core||AAA+ ATPase domain||P-loop containing nucleoside triphosphate hydrolase||Orc1-like, AAA ATPase domain||Origin recognition complex subunit 4, C-terminal
novel_circ_0019284	1	93544106	93549426	+	5320	351	ENSG00000137942;	exon:93544107-93544216,exon:93547347-93547441,exon:93549278-93549426	FNBP1L	SH3-like domain superfamily||FNBP1L, F-BAR domain||AH/BAR domain superfamily||FCH domain||SH3 domain||FNBP1L, SH3 domain||Formin-binding protein 1-like||F-BAR domain
hsa_circ_0045758	17	76011575	76012089	-	514	288	ENSG00000167880;	exon:76011576-76011668,exon:76011772-76011882,exon:76012006-76012089	EVPL	Spectrin/alpha-actinin||SH3 domain||Plectin repeat||Desmoplakin, SH3 domain||Plakin repeat superfamily||Envoplakin
hsa_circ_0003893	15	80936673	80937979	+	1306	398	ENSG00000103888;	exon:80937794-80937979	CEMIP	WxxW domain||ILEI/PANDER domain||-||Pectin lyase fold/virulence factor||Cell surface hyaluronidase, PANDER-like domain||G8 domain
hsa_circ_0003892	19	11120091	11128085	+	7994	544	ENSG00000130164;	exon:11120092-11120233,exon:11120370-11120522,exon:11123174-11123344,exon:11128008-11128085	LDLR	EGF-type aspartate/asparagine hydroxylation site||LDL receptor-like superfamily||-||Low-density lipoprotein (LDL) receptor class A, conserved site||Six-bladed beta-propeller, TolB-like||EGF-like calcium-binding, conserved site||EGF-like, conserved site||LDLR class B repeat||Low-density lipoprotein (LDL) receptor class A repeat||Growth factor receptor cysteine-rich domain superfamily||EGF-like cal…
hsa_circ_0003895	9	127523678	127527322	-	3644	403	ENSG00000136830;	exon:127523679-127523846,exon:127525058-127525163,exon:127527194-127527322	FAM129B	Pleckstrin homology domain||Niban-like||PH-like domain superfamily
hsa_circ_0003896	1	229450524	229465519	-	14995	981	ENSG00000069248;	exon:229450525-229450605,exon:229452525-229452643,exon:229464624-229464875,exon:229465420-229465519	NUP133	WD40/YVTN repeat-like-containing domain superfamily||Nucleoporin, Nup133/Nup155-like, C-terminal||Nuclear pore complex protein Nup133-like
hsa_circ_0003899	17	43521368	43522226	+	858	377	ENSG00000067596;	exon:43521369-43521565,exon:43522047-43522226	DHX8	Nucleic acid-binding, OB-fold||P-loop containing nucleoside triphosphate hydrolase||DNA/RNA helicase, ATP-dependent, DEAH-box type, conserved site||-||Domain of unknown function DUF1605||RNA-binding domain, S1||S1 domain||Helicase, C-terminal||Helicase superfamily 1/2, ATP-binding domain||Helicase-associated domain
hsa_circ_0003898	2	230759958	230793331	+	33373	441	ENSG00000135932;	exon:230759959-230760115,exon:230793213-230793331	CAB39	Mo25-like||Armadillo-type fold||Armadillo-like helical
hsa_circ_0001767	7	149112136	149118348	-	6212	286	ENSG00000204947;	exon:149112137-149112295,exon:149118222-149118348	ZNF425	Zinc finger C2H2-type||Krueppel-associated box||Zinc finger C2H2 superfamily||KRAB domain superfamily
hsa_circ_0001766	7	149018991	149021147	-	2156	387	ENSG00000155660;	exon:149018992-149019197,exon:149020967-149021147	PDIA4	Protein disulphide isomerase||Disulphide isomerase||Thioredoxin-like superfamily||Thioredoxin domain||Thioredoxin, conserved site||Protein disulfide-isomerase A4, TRX-like domain b||Protein disulphide-isomerase A4
hsa_circ_0001769	7	152309965	152315338	-	5373	460	ENSG00000055609;	exon:152309966-152310075,exon:152311798-152311946,exon:152315138-152315338	KMT2C	Zinc finger, PHD-type||HMG-I/HMG-Y, DNA-binding, conserved site||KMT2C, ePHD2||Post-SET domain||Histone-lysine N-methyltransferase 2C||FY-rich, C-terminal||-||Zinc finger, FYVE/PHD-type||High mobility group box domain superfamily||FY-rich, N-terminal||Zinc finger, RING-type||Zinc finger, PHD-finger||Zinc finger, RING/FYVE/PHD-type||SET domain||KMT2C, ePHD1||High mobility group box domain||Extende…
novel_circ_0023116	2	229965	234272	-	4307	318	ENSG00000035115;	exon:229966-230044,exon:233101-233229,exon:234160-234272	SH3YL1	SH3 domain||SH3-like domain superfamily||-||Ysc84 actin-binding domain||SH3YL1-like, SYLF domain||SH3YL1, SH3 domain
novel_circ_0023117	2	229976240	229996923	+	20683	380	ENSG00000153832;	exon:229976241-229976349,exon:229992180-229992280,exon:229996751-229996923	FBXO36	F-box-like domain superfamily||F-box domain
hsa_circ_0004041	1	153937487	153937863	-	376	267	ENSG00000198837;	exon:153937488-153937614,exon:153937724-153937863	DENND4B	dDENN domain||Pentatricopeptide repeat||uDENN domain||MABP domain||Tetratricopeptide-like helical domain superfamily||cDENN domain||Tripartite DENN domain
hsa_circ_0004040	14	50145169	50150230	-	5061	506	ENSG00000100485;	exon:50145170-50145332,exon:50150008-50150230	SOS2	Dbl homology (DH) domain||Ras guanine-nucleotide exchange factor catalytic domain superfamily||Ras-like guanine nucleotide exchange factor||Ras-like guanine nucleotide exchange factor, N-terminal||Pleckstrin homology domain||-||Histone H2A/H2B/H3||Ras guanine-nucleotide exchange factor, conserved site||PH-like domain superfamily||Dbl homology (DH) domain superfamily||Ras guanine-nucleotide exchan…
hsa_circ_0004047	14	34792774	34795765	-	2991	382	ENSG00000198604;	exon:34795670-34795765	BAZ1A	WSTF/Acf1/Cbp146||Bromodomain-like superfamily||Zinc finger, PHD-finger||Zinc finger, RING/FYVE/PHD-type||Bromodomain||Zinc finger, PHD-type, conserved site||Bromodomain, conserved site||Zinc finger, PHD-type||DDT domain||-||Zinc finger, FYVE/PHD-type||WHIM2 domain||Bromodomain adjacent to zinc finger domain protein 1A, bromodomain||WHIM1 domain
hsa_circ_0004046	3	15028585	15030452	+	1867	312	ENSG00000177463;	exon:15028586-15028719,exon:15030275-15030452	NR2C2	Zinc finger, nuclear hormone receptor-type||Nuclear hormone receptor-like domain superfamily||Nuclear hormone receptor||-||Zinc finger, NHR/GATA-type||Nuclear hormone receptor, ligand-binding domain
hsa_circ_0004044	2	223878528	223895630	-	17102	777	ENSG00000286239;ENSG00000085449;	exon:223895504-223895630	AC093884.1;WDFY1	-
hsa_circ_0004049	16	19763847	19764112	+	265	131	ENSG00000174628;	exon:19763848-19764112	IQCK	-
novel_circ_0017939	1	28027788	28048426	-	20638	259	ENSG00000158161;	exon:28027789-28027926,exon:28042571-28042650,exon:28048383-28048426	EYA3	EYA domain||EYA domain superfamily||Eyes absent homologue 3||Eyes absent family
novel_circ_0017938	1	28011305	28011711	-	406	405	ENSG00000158161;	intron:28011306-28011711	EYA3	EYA domain||EYA domain superfamily||Eyes absent homologue 3||Eyes absent family
hsa_circ_0001496	5	69294792	69314043	-	19251	617	ENSG00000183323;	exon:69294793-69294900,exon:69307951-69308028,exon:69311118-69311204,exon:69313985-69314043	CCDC125	Coiled-coil domain-containing protein 125
hsa_circ_0001495	5	69174876	69175537	+	661	378	ENSG00000134057;	exon:69174877-69175113,exon:69175397-69175537	CCNB1	Cyclin-like||-||Cyclin, N-terminal||Cyclin, C-terminal domain||Cyclin||Cyclin-like superfamily
hsa_circ_0001492	5	65988634	65994864	+	6230	364	ENSG00000112851;	exon:65988635-65988682,exon:65992710-65992907,exon:65994747-65994864	ERBIN	PDZ domain||Leucine-rich repeat||Erbin||PDZ superfamily||Leucine-rich repeat domain superfamily||Leucine-rich repeat, typical subtype
hsa_circ_0001491	5	62550366	62561257	+	10891	332	ENSG00000086200;	exon:62550367-62550462,exon:62551223-62551336,exon:62561136-62561257	IPO11	Importin-beta, N-terminal domain||Armadillo-like helical||Armadillo-type fold||-
hsa_circ_0001498	5	77463094	77464809	-	1715	181	ENSG00000164253;	exon:77463095-77463226	WDR41	WD repeat-containing protein 41||-||WD40 repeat, conserved site||WD40-repeat-containing domain||WD40 repeat||WD40/YVTN repeat-like-containing domain superfamily||G-protein beta WD-40 repeat||WD40-repeat-containing domain superfamily
hsa_circ_0019608	10	101797979	101807901	-	9922	1504	ENSG00000198408;	exon:101797980-101798154,exon:101807730-101807901	OGA	Glycoside hydrolase superfamily||Beta-N-acetylglucosaminidase||Acyl-CoA N-acyltransferase
novel_circ_0013133	17	66175043	66183307	-	8264	475	ENSG00000154240;	exon:66175044-66175216,exon:66176830-66177020,exon:66183194-66183307	CEP112	-||Domain of unknown function DUF4485
novel_circ_0013138	17	6659924	6661413	+	1489	352	ENSG00000274114;	exon:6659925-6660068,exon:6661204-6661413	--	-
novel_circ_0021800	2	151416560	151428922	+	12362	359	ENSG00000080345;	exon:151416561-151416688,exon:151416807-151416901,exon:151428784-151428922	RIF1	Armadillo-like helical||Armadillo-type fold||Telomere-associated protein Rif1, N-terminal||-
novel_circ_0021801	2	151422949	151435580	+	12631	498	ENSG00000080345;	exon:151422950-151423042,exon:151428784-151428922,exon:151433077-151433228,exon:151435463-151435580	RIF1	Armadillo-like helical||Armadillo-type fold||Telomere-associated protein Rif1, N-terminal||-
novel_circ_0021806	2	151438683	151443709	+	5026	412	ENSG00000080345;	exon:151438684-151438746,exon:151440027-151440127,exon:151443259-151443329,exon:151443529-151443709	RIF1	Armadillo-like helical||Armadillo-type fold||Telomere-associated protein Rif1, N-terminal||-
novel_circ_0021804	2	151433076	151437351	+	4275	286	ENSG00000080345;	exon:151436827-151437003,exon:151437241-151437351	RIF1	Armadillo-like helical||Armadillo-type fold||Telomere-associated protein Rif1, N-terminal||-
novel_circ_0021808	2	151440026	151443709	+	3683	350	ENSG00000080345;	exon:151440027-151440127,exon:151443259-151443329,exon:151443529-151443709	RIF1	Armadillo-like helical||Armadillo-type fold||Telomere-associated protein Rif1, N-terminal||-
novel_circ_0021809	2	151440026	151445445	+	5419	277	ENSG00000080345;	exon:151440027-151440127,exon:151443259-151443329,exon:151445338-151445445	RIF1	Armadillo-like helical||Armadillo-type fold||Telomere-associated protein Rif1, N-terminal||-
novel_circ_0028981	4	185523361	185525171	-	1810	235	ENSG00000154553;	exon:185523362-185523446,exon:185525020-185525171	PDLIM3	PDZ domain||Domain of unknown function DUF4749||Zasp-like motif||Zinc finger, LIM-type||-||PDZ superfamily
novel_circ_0028982	4	185611779	185630598	-	18819	49	ENSG00000154556;	exon:185630549-185630598	SORBS2	SH3-like domain superfamily||Sorbin and SH3 domain-containing protein||SH3 domain||SoHo domain||Zinc finger C2H2-type||-
novel_circ_0028983	4	185614830	185615159	-	329	242	ENSG00000154556;	exon:185614831-185614959,exon:185615045-185615159	SORBS2	SH3-like domain superfamily||Sorbin and SH3 domain-containing protein||SH3 domain||SoHo domain||Zinc finger C2H2-type||-
novel_circ_0028985	4	186149172	186152045	+	2873	248	ENSG00000109794;	exon:186149173-186149283,exon:186149566-186149704	FAM149A	Protein of unknown function DUF3719||-||Protein FAM149
novel_circ_0028988	4	1892165	1904378	+	12213	259	ENSG00000109685;	exon:1892166-1892263,exon:1904216-1904378	NSD2	PWWP domain||High mobility group box domain superfamily||High mobility group box domain||-||Zinc finger, FYVE/PHD-type||Post-SET domain||SET domain||AWS domain||Zinc finger, PHD-finger||NSD, Cys-His rich domain||Zinc finger, RING/FYVE/PHD-type||Zinc finger, PHD-type, conserved site||Zinc finger, RING-type||Zinc finger, PHD-type
novel_circ_0028989	4	1892165	1918623	+	26458	97	ENSG00000109685;	exon:1892166-1892263	NSD2	PWWP domain||High mobility group box domain superfamily||High mobility group box domain||-||Zinc finger, FYVE/PHD-type||Post-SET domain||SET domain||AWS domain||Zinc finger, PHD-finger||NSD, Cys-His rich domain||Zinc finger, RING/FYVE/PHD-type||Zinc finger, PHD-type, conserved site||Zinc finger, RING-type||Zinc finger, PHD-type
novel_circ_0023534	2	28776850	28799433	+	22583	131	ENSG00000213639;	exon:28776851-28776982	PPP1CB	Metallo-dependent phosphatase-like||Serine-threonine protein phosphatase, N-terminal||Serine/threonine-specific protein phosphatase/bis(5-nucleosyl)-tetraphosphatase||Calcineurin-like phosphoesterase domain, ApaH type||-
novel_circ_0023535	2	28781737	28788809	+	7072	222	ENSG00000213639;	exon:28783907-28783978,exon:28788658-28788809	PPP1CB	Metallo-dependent phosphatase-like||Serine-threonine protein phosphatase, N-terminal||Serine/threonine-specific protein phosphatase/bis(5-nucleosyl)-tetraphosphatase||Calcineurin-like phosphoesterase domain, ApaH type||-
novel_circ_0023531	2	28776850	28788809	+	11959	353	ENSG00000213639;	exon:28776851-28776982,exon:28783907-28783978,exon:28788658-28788809	PPP1CB	Metallo-dependent phosphatase-like||Serine-threonine protein phosphatase, N-terminal||Serine/threonine-specific protein phosphatase/bis(5-nucleosyl)-tetraphosphatase||Calcineurin-like phosphoesterase domain, ApaH type||-
novel_circ_0023533	2	28776850	28799299	+	22449	231	ENSG00000213639;	exon:28776851-28776982,exon:28799199-28799299	PPP1CB	Metallo-dependent phosphatase-like||Serine-threonine protein phosphatase, N-terminal||Serine/threonine-specific protein phosphatase/bis(5-nucleosyl)-tetraphosphatase||Calcineurin-like phosphoesterase domain, ApaH type||-
novel_circ_0033253	6	20124407	20131199	-	6792	109	ENSG00000172197;	exon:20128699-20128753,exon:20131144-20131199	MBOAT1	Membrane bound O-acyl transferase, MBOAT
hsa_circ_0037862	16	11684164	11688445	-	4281	334	ENSG00000153066;	exon:11684165-11684245,exon:11687857-11687966,exon:11688303-11688445	TXNDC11	-||Thioredoxin-like superfamily||Thioredoxin domain
hsa_circ_0037869	16	11698124	11721670	-	23546	408	ENSG00000153066;	exon:11698125-11698325,exon:11700452-11700564,exon:11721577-11721670	TXNDC11	-||Thioredoxin-like superfamily||Thioredoxin domain
novel_circ_0008873	15	40983761	40985426	-	1665	243	ENSG00000128908;	exon:40984197-40984352,exon:40985338-40985426	INO80	DBINO domain||-||SNF2-related, N-terminal domain||P-loop containing nucleoside triphosphate hydrolase||DNA helicase Ino80||SNF2-like, N-terminal domain superfamily||Helicase superfamily 1/2, ATP-binding domain||Helicase, C-terminal
hsa_circ_0075267	5	179560024	179577136	+	17112	580	ENSG00000176783;	exon:179569302-179569425,exon:179577075-179577136	RUFY1	Zinc finger, RING-type||RUN domain||RUN domain superfamily||Zinc finger, RING/FYVE/PHD-type||-||Zinc finger, FYVE-related||Zinc finger, FYVE/PHD-type||FYVE zinc finger
hsa_circ_0070132	4	78308065	78318986	+	10921	603	ENSG00000138759;	exon:78318810-78318986	FRAS1	EGF-like domain||Na-Ca exchanger/integrin-beta4||CalX-like domain superfamily||Growth factor receptor cysteine-rich domain superfamily||-||VWFC domain||CSPG repeat||Furin-like repeat
hsa_circ_0070133	4	78308065	78337817	+	29752	888	ENSG00000138759;	exon:78308066-78308209,exon:78333272-78333412,exon:78337674-78337817	FRAS1	EGF-like domain||Na-Ca exchanger/integrin-beta4||CalX-like domain superfamily||Growth factor receptor cysteine-rich domain superfamily||-||VWFC domain||CSPG repeat||Furin-like repeat
hsa_circ_0075269	5	179567460	179577136	+	9676	288	ENSG00000176783;	exon:179567461-179567562,exon:179569302-179569425,exon:179577075-179577136	RUFY1	Zinc finger, RING-type||RUN domain||RUN domain superfamily||Zinc finger, RING/FYVE/PHD-type||-||Zinc finger, FYVE-related||Zinc finger, FYVE/PHD-type||FYVE zinc finger
hsa_circ_0075268	5	179567460	179569425	+	1965	226	ENSG00000176783;	exon:179567461-179567562,exon:179569302-179569425	RUFY1	Zinc finger, RING-type||RUN domain||RUN domain superfamily||Zinc finger, RING/FYVE/PHD-type||-||Zinc finger, FYVE-related||Zinc finger, FYVE/PHD-type||FYVE zinc finger
hsa_circ_0030070	13	41323055	41331369	+	8314	505	ENSG00000172766;	exon:41323056-41323190	NAA16	Tetratricopeptide repeat 2||N-terminal acetyltransferase A, auxiliary subunit||Tetratricopeptide repeat||Tetratricopeptide-like helical domain superfamily||-||Tetratricopeptide repeat-containing domain
hsa_circ_0074136	5	138517560	138518867	-	1307	316	ENSG00000120705;	exon:138518692-138518867	ETF1	eRF1 domain 2||Peptide chain release factor eRF1/aRF1||50S ribosomal protein L30e-like||Peptide Chain Release Factor eRF1/aRF1, N-terminal||eRF1 domain 1/Pelota-like||eRF1 domain 3||-
hsa_circ_0033180	14	100337061	100343387	-	6326	428	ENSG00000140105;	exon:100337062-100337202,exon:100342398-100342571,exon:100343275-100343387	WARS	WHEP-TRS domain||Aminoacyl-tRNA synthetase, class I, conserved site||Aminoacyl-tRNA synthetase, class Ic||-||S15/NS1, RNA-binding||Rossmann-like alpha/beta/alpha sandwich fold||Tryptophan-tRNA ligase
hsa_circ_0033182	14	100342397	100361921	-	19524	1014	ENSG00000140105;	exon:100342398-100342571,exon:100360554-100360662,exon:100361708-100361921	WARS	WHEP-TRS domain||Aminoacyl-tRNA synthetase, class I, conserved site||Aminoacyl-tRNA synthetase, class Ic||-||S15/NS1, RNA-binding||Rossmann-like alpha/beta/alpha sandwich fold||Tryptophan-tRNA ligase
hsa_circ_0033184	14	100353686	100361921	-	8235	626	ENSG00000140105;	exon:100353687-100353869,exon:100361708-100361921	WARS	WHEP-TRS domain||Aminoacyl-tRNA synthetase, class I, conserved site||Aminoacyl-tRNA synthetase, class Ic||-||S15/NS1, RNA-binding||Rossmann-like alpha/beta/alpha sandwich fold||Tryptophan-tRNA ligase
novel_circ_0039890	X	12799206	12810146	+	10940	222	ENSG00000101911;	exon:12809234-12809332,exon:12810022-12810146	PRPS2	Ribose-phosphate pyrophosphokinase, bacterial-type||Ribose-phosphate pyrophosphokinase, N-terminal domain||Phosphoribosyl pyrophosphate synthetase, conserved site||Ribose-phosphate pyrophosphokinase||Phosphoribosyltransferase-like||Phosphoribosyltransferase domain
novel_circ_0039893	X	1285777	1288888	+	3111	271	ENSG00000198223;	exon:1285778-1285920,exon:1288759-1288888	CSF2RA	-||Short hematopoietin receptor, family 2, conserved site||Immunoglobulin-like fold||Fibronectin type III||Fibronectin type III superfamily||IL-3 receptor alpha chain, N-terminal||Type I cytokine receptor, cytokine-binding domain
novel_circ_0039894	X	1285777	1290509	+	4732	566	ENSG00000198223;	exon:1285778-1285920,exon:1288519-1288642,exon:1288759-1288888,exon:1290337-1290509	CSF2RA	-||Short hematopoietin receptor, family 2, conserved site||Immunoglobulin-like fold||Fibronectin type III||Fibronectin type III superfamily||IL-3 receptor alpha chain, N-terminal||Type I cytokine receptor, cytokine-binding domain
novel_circ_0039895	X	1288518	1288888	+	370	252	ENSG00000198223;	exon:1288519-1288642,exon:1288759-1288888	CSF2RA	-||Short hematopoietin receptor, family 2, conserved site||Immunoglobulin-like fold||Fibronectin type III||Fibronectin type III superfamily||IL-3 receptor alpha chain, N-terminal||Type I cytokine receptor, cytokine-binding domain
novel_circ_0039896	X	1288518	1290509	+	1991	418	ENSG00000198223;	exon:1288519-1288642,exon:1288759-1288888,exon:1290343-1290509	CSF2RA	-||Short hematopoietin receptor, family 2, conserved site||Immunoglobulin-like fold||Fibronectin type III||Fibronectin type III superfamily||IL-3 receptor alpha chain, N-terminal||Type I cytokine receptor, cytokine-binding domain
novel_circ_0004503	12	121934044	121934356	+	312	227	ENSG00000158023;	intron:121934045-121934163,intron:121934247-121934356	WDR66	WD40-repeat-containing domain superfamily||Quinoprotein alcohol dehydrogenase-like superfamily||WD40-repeat-containing domain||EF-hand domain pair||WD40 repeat||WD40/YVTN repeat-like-containing domain superfamily
novel_circ_0004500	12	121799846	121802784	-	2938	363	ENSG00000212694;ENSG00000139725;	exon:121799847-121799956,exon:121801707-121801808,exon:121802631-121802784	--;RHOF	-
hsa_circ_0010635	1	21838824	21840017	-	1193	637	ENSG00000142798;	exon:21839822-21840017	HSPG2	-||SEA domain||LDL receptor-like superfamily||Immunoglobulin V-set domain||EGF-like domain||Immunoglobulin subtype 2||Concanavalin A-like lectin/glucanase domain superfamily||Immunoglobulin-like domain superfamily||Immunoglobulin-like domain||Immunoglobulin-like fold||Laminin EGF domain||Laminin IV||EGF-like calcium-binding domain||Laminin G domain||EGF-like, conserved site||Immunoglobulin subtyp…
hsa_circ_0070304	4	84708908	84721572	-	12664	776	ENSG00000163625;	exon:84708909-84709028,exon:84721409-84721572	WDFY3	PH-BEACH domain||WD40-repeat-containing domain superfamily||BEACH domain superfamily||Zinc finger, RING/FYVE/PHD-type||BEACH domain||WD40/YVTN repeat-like-containing domain superfamily||Concanavalin A-like lectin/glucanase domain superfamily||Armadillo-type fold||WD40-repeat-containing domain||WD40 repeat||-||Zinc finger, FYVE-related||Zinc finger, FYVE/PHD-type||FYVE zinc finger||WD40 repeat, co…
hsa_circ_0070303	4	84708908	84717016	-	8108	463	ENSG00000163625;	exon:84708909-84709028,exon:84709293-84709347	WDFY3	PH-BEACH domain||WD40-repeat-containing domain superfamily||BEACH domain superfamily||Zinc finger, RING/FYVE/PHD-type||BEACH domain||WD40/YVTN repeat-like-containing domain superfamily||Concanavalin A-like lectin/glucanase domain superfamily||Armadillo-type fold||WD40-repeat-containing domain||WD40 repeat||-||Zinc finger, FYVE-related||Zinc finger, FYVE/PHD-type||FYVE zinc finger||WD40 repeat, co…
novel_circ_0029769	4	79585147	79606956	+	21809	255	ENSG00000250334;	exon:79585148-79585227,exon:79600728-79600777,exon:79606829-79606956	--	-
hsa_circ_0036770	15	90220981	90221765	+	784	378	ENSG00000185033;	exon:90220982-90221093,exon:90221367-90221480,exon:90221614-90221765	SEMA4B	-||Sema domain superfamily||WD40/YVTN repeat-like-containing domain superfamily||Sema domain||Semaphorin||Plexin repeat||PSI domain
novel_circ_0029765	4	79085226	79086262	+	1036	286	ENSG00000249307;	intron:79085227-79085347,intron:79086096-79086262	--	-
novel_circ_0029764	4	79044974	79086262	+	41288	435	ENSG00000249307;	intron:79044975-79045124,intron:79085227-79085347,intron:79086096-79086262	--	-
hsa_circ_0075881	6	25604811	25606273	+	1462	295	ENSG00000079691;	exon:25604812-25604893,exon:25606061-25606273	CARMIL1	CARMIL, C-terminal domain||Leucine-rich repeat-containing protein 16A||CARMIL, pleckstrin homology domain||PH-like domain superfamily||Leucine-rich repeat||Leucine-rich repeat domain superfamily||-
hsa_circ_0031857	14	50456515	50464133	-	7618	278	ENSG00000012983;	exon:50456516-50456594,exon:50462665-50462781,exon:50464052-50464133	MAP4K5	Citron homology (CNH) domain||Mitogen-activated protein (MAP) kinase kinase kinase kinase||Protein kinase, ATP binding site||-||Protein kinase-like domain superfamily||Protein kinase domain
novel_circ_0038279	9	122998596	123020459	+	21863	319	ENSG00000011454;	exon:122998597-122998766,exon:123020309-123020459	RABGAP1	Rab-GTPase-TBC domain||PTB/PI domain||GPCR, rhodopsin-like, 7TM||PH-like domain superfamily||Rab-GTPase-TBC domain superfamily||-||Kinesin-like||G protein-coupled receptor, rhodopsin-like||Rab GTPase-activating protein 1
novel_circ_0038278	9	122998596	123015636	+	17040	436	ENSG00000011454;	exon:122998597-122998766,exon:123010354-123010528,exon:123015543-123015636	RABGAP1	Rab-GTPase-TBC domain||PTB/PI domain||GPCR, rhodopsin-like, 7TM||PH-like domain superfamily||Rab-GTPase-TBC domain superfamily||-||Kinesin-like||G protein-coupled receptor, rhodopsin-like||Rab GTPase-activating protein 1
novel_circ_0038277	9	122997258	123020459	+	23201	252	ENSG00000011454;	exon:122997259-122997361,exon:123020309-123020459	RABGAP1	Rab-GTPase-TBC domain||PTB/PI domain||GPCR, rhodopsin-like, 7TM||PH-like domain superfamily||Rab-GTPase-TBC domain superfamily||-||Kinesin-like||G protein-coupled receptor, rhodopsin-like||Rab GTPase-activating protein 1
novel_circ_0038274	9	122996040	123010528	+	14488	284	ENSG00000011454;	exon:122996041-122996151,exon:123010354-123010528	RABGAP1	Rab-GTPase-TBC domain||PTB/PI domain||GPCR, rhodopsin-like, 7TM||PH-like domain superfamily||Rab-GTPase-TBC domain superfamily||-||Kinesin-like||G protein-coupled receptor, rhodopsin-like||Rab GTPase-activating protein 1
novel_circ_0038273	9	122996040	122998766	+	2726	381	ENSG00000011454;	exon:122996041-122996151,exon:122997259-122997361,exon:122998597-122998766	RABGAP1	Rab-GTPase-TBC domain||PTB/PI domain||GPCR, rhodopsin-like, 7TM||PH-like domain superfamily||Rab-GTPase-TBC domain superfamily||-||Kinesin-like||G protein-coupled receptor, rhodopsin-like||Rab GTPase-activating protein 1
novel_circ_0038271	9	122984484	123020459	+	35975	384	ENSG00000011454;	exon:122984485-122984719,exon:123020309-123020459	RABGAP1	Rab-GTPase-TBC domain||PTB/PI domain||GPCR, rhodopsin-like, 7TM||PH-like domain superfamily||Rab-GTPase-TBC domain superfamily||-||Kinesin-like||G protein-coupled receptor, rhodopsin-like||Rab GTPase-activating protein 1
novel_circ_0007943	14	58457758	58487166	+	29408	159	ENSG00000100578;	exon:58487007-58487166	KIAA0586	-||Protein TALPID3
novel_circ_0015263	19	54114441	54115319	-	878	330	ENSG00000105619;	exon:54114442-54114700,exon:54115247-54115319	TFPT	TCF3 fusion partner||-
novel_circ_0015262	19	53521855	53522684	+	829	295	ENSG00000130844;	exon:53521856-53522084,exon:53522617-53522684	ZNF331	Krueppel-associated box||Zinc finger C2H2-type||Zinc finger C2H2 superfamily||KRAB domain superfamily
novel_circ_0015265	19	54168170	54169660	-	1490	121	ENSG00000167608;	exon:54168171-54168292	TMC4	Transmembrane channel-like protein||TMC domain||-
novel_circ_0007946	14	58488620	58512627	+	24007	105	ENSG00000100578;	exon:58512522-58512627	KIAA0586	-||Protein TALPID3
novel_circ_0007945	14	58467734	58470723	+	2989	297	ENSG00000100578;	exon:58467735-58467922,exon:58470613-58470723	KIAA0586	-||Protein TALPID3
novel_circ_0004367	12	116918530	116928127	+	9597	304	ENSG00000174989;	intron:116918531-116918731,intron:116928023-116928127	FBXW8	WD40-repeat-containing domain||WD40 repeat||Quinoprotein alcohol dehydrogenase-like superfamily||WD40/YVTN repeat-like-containing domain superfamily||F-box-like domain superfamily||WD40 repeat, conserved site||F-box domain
novel_circ_0007949	14	58585619	58586826	+	1207	108	n/a	intergenic_region:58585620-58585728	--	-
novel_circ_0007948	14	58498782	58512627	+	13845	177	ENSG00000100578;	exon:58498783-58498960	KIAA0586	-||Protein TALPID3
novel_circ_0004361	12	116232060	116237705	-	5645	332	ENSG00000123066;	exon:116232061-116232156,exon:116237468-116237705	MED13L	-||MID domain of medPIWI||Mediator complex subunit Med13, C-terminal||Mediator complex, subunit Med13, N-terminal, metazoa/fungi
hsa_circ_0050386	19	32622421	32625966	-	3545	291	ENSG00000105186;	exon:32622422-32622619,exon:32625874-32625966	ANKRD27	VPS9 domain superfamily||Ankyrin repeat-containing domain||Ankyrin repeat||Ankyrin repeat-containing domain superfamily||-||VPS9 domain
hsa_circ_0077650	6	111363852	111368028	-	4176	1120	ENSG00000009413;	exon:111363853-111363978	REV3L	Ribonuclease H-like superfamily||-||Domain of unknown function DUF1725||Ribonuclease H superfamily||DNA-directed DNA polymerase, family B, exonuclease domain||DNA polymerase family B, C-terminal domain||DNA-directed DNA polymerase, family B, multifunctional domain||DNA-directed DNA polymerase, family B||DNA-directed DNA polymerase, family B, conserved site||Domain of unknown function DUF4683||DNA…
hsa_circ_0077655	6	111387764	111392972	-	5208	531	ENSG00000009413;	exon:111387765-111387913,exon:111388001-111388085,exon:111390086-111390180,exon:111392876-111392972	REV3L	Ribonuclease H-like superfamily||-||Domain of unknown function DUF1725||Ribonuclease H superfamily||DNA-directed DNA polymerase, family B, exonuclease domain||DNA polymerase family B, C-terminal domain||DNA-directed DNA polymerase, family B, multifunctional domain||DNA-directed DNA polymerase, family B||DNA-directed DNA polymerase, family B, conserved site||Domain of unknown function DUF4683||DNA…
hsa_circ_0077656	6	111387764	111416472	-	28708	957	ENSG00000009413;	exon:111387765-111387913,exon:111411480-111411554,exon:111416283-111416472	REV3L	Ribonuclease H-like superfamily||-||Domain of unknown function DUF1725||Ribonuclease H superfamily||DNA-directed DNA polymerase, family B, exonuclease domain||DNA polymerase family B, C-terminal domain||DNA-directed DNA polymerase, family B, multifunctional domain||DNA-directed DNA polymerase, family B||DNA-directed DNA polymerase, family B, conserved site||Domain of unknown function DUF4683||DNA…
hsa_circ_0077657	6	111387764	111472140	-	84376	56625	ENSG00000009413;	exon:111387765-111387913,exon:111388001-111388085,exon:111472013-111472140	REV3L	Ribonuclease H-like superfamily||-||Domain of unknown function DUF1725||Ribonuclease H superfamily||DNA-directed DNA polymerase, family B, exonuclease domain||DNA polymerase family B, C-terminal domain||DNA-directed DNA polymerase, family B, multifunctional domain||DNA-directed DNA polymerase, family B||DNA-directed DNA polymerase, family B, conserved site||Domain of unknown function DUF4683||DNA…
hsa_circ_0077659	6	111405469	111416472	-	11003	426	ENSG00000009413;	exon:111405470-111405630,exon:111411480-111411554,exon:111416283-111416472	REV3L	Ribonuclease H-like superfamily||-||Domain of unknown function DUF1725||Ribonuclease H superfamily||DNA-directed DNA polymerase, family B, exonuclease domain||DNA polymerase family B, C-terminal domain||DNA-directed DNA polymerase, family B, multifunctional domain||DNA-directed DNA polymerase, family B||DNA-directed DNA polymerase, family B, conserved site||Domain of unknown function DUF4683||DNA…
novel_circ_0029877	4	84803289	84820186	-	16897	101	ENSG00000163625;	exon:84820085-84820186	WDFY3	PH-BEACH domain||WD40-repeat-containing domain superfamily||BEACH domain superfamily||Zinc finger, RING/FYVE/PHD-type||BEACH domain||WD40/YVTN repeat-like-containing domain superfamily||Concanavalin A-like lectin/glucanase domain superfamily||Armadillo-type fold||WD40-repeat-containing domain||WD40 repeat||-||Zinc finger, FYVE-related||Zinc finger, FYVE/PHD-type||FYVE zinc finger||WD40 repeat, co…
novel_circ_0038853	9	27029024	27048274	+	19250	355	ENSG00000096872;	exon:27029025-27029104,exon:27044742-27044795,exon:27047274-27047371,exon:27048148-27048274	IFT74	-||Intraflagellar transport protein 74
novel_circ_0038852	9	27009019	27048274	+	39255	423	ENSG00000096872;	exon:27009020-27009158,exon:27011906-27011968,exon:27047274-27047371,exon:27048148-27048274	IFT74	-||Intraflagellar transport protein 74
novel_circ_0038851	9	27009019	27029104	+	20085	217	ENSG00000096872;	exon:27009020-27009158,exon:27029025-27029104	IFT74	-||Intraflagellar transport protein 74
novel_circ_0038850	9	27009019	27018687	+	9668	383	ENSG00000096872;	exon:27009020-27009158,exon:27011906-27011968,exon:27016907-27017050,exon:27018647-27018687	IFT74	-||Intraflagellar transport protein 74
novel_circ_0038855	9	27043275	27062765	+	19490	244	ENSG00000096872;	intron:27047274-27047371,intron:27062618-27062765	IFT74	-||Intraflagellar transport protein 74
novel_circ_0038854	9	27043275	27060651	+	17376	185	ENSG00000096872;	intron:27056334-27056459,intron:27060591-27060651	IFT74	-||Intraflagellar transport protein 74
hsa_circ_0062397	22	20824325	20838731	-	14406	300	ENSG00000241973;	exon:20824326-20824414,exon:20834562-20834655,exon:20838615-20838731	PI4KA	Phosphatidylinositol kinase||Armadillo-type fold||Phosphatidylinositol 3/4-kinase, conserved site||Phosphatidylinositol 3-/4-kinase, catalytic domain superfamily||Phosphatidylinositol 3-/4-kinase, catalytic domain||-||Phosphoinositide 3-kinase, accessory (PIK) domain||Protein kinase-like domain superfamily
hsa_circ_0066834	3	113788712	113789840	+	1128	272	ENSG00000114573;	exon:113788713-113788875,exon:113789732-113789840	ATP6V1A	ATPase, F1/V1/A1 complex, alpha/beta subunit, N-terminal domain||ATP synthase subunit alpha, N-terminal domain-like superfamily||V-type ATP synthase catalytic alpha chain||ATPase, F1/V1/A1 complex, alpha/beta subunit, nucleotide-binding domain||ATPsynthase alpha/beta subunit, N-terminal extension||ATPase, F1/V1 complex, beta/alpha subunit, C-terminal||ATPase, alpha/beta subunit, nucleotide-bindin…
hsa_circ_0062390	22	20807361	20813506	-	6145	312	ENSG00000241973;	exon:20807362-20807458,exon:20810967-20811032,exon:20813358-20813506	PI4KA	Phosphatidylinositol kinase||Armadillo-type fold||Phosphatidylinositol 3/4-kinase, conserved site||Phosphatidylinositol 3-/4-kinase, catalytic domain superfamily||Phosphatidylinositol 3-/4-kinase, catalytic domain||-||Phosphoinositide 3-kinase, accessory (PIK) domain||Protein kinase-like domain superfamily
hsa_circ_0054263	2	42640172	42659862	+	19690	385	ENSG00000057935;	exon:42640173-42640236,exon:42656200-42656302,exon:42659763-42659862	MTA3	-||Zinc finger, GATA-type||Metastasis-associated protein MTA1, R1 domain||ELM2 domain||SANT/Myb domain||Bromo adjacent homology (BAH) domain||Mesoderm induction early response protein/metastasis-associated protein||Homeobox-like domain superfamily||SANT domain
novel_circ_0026807	3	197051576	197059998	-	8422	200	ENSG00000075711;	exon:197051577-197051668,exon:197059889-197059998	DLG1	L27 domain superfamily||SH3-like domain superfamily||PDZ domain||PDZ-associated domain of NMDA receptors||Disks large 1-like||PDZ superfamily||Guanylate kinase-like domain||L27-1||L27 domain||Guanylate kinase/L-type calcium channel beta subunit||P-loop containing nucleoside triphosphate hydrolase||Guanylate kinase, conserved site||Disks large homologue 1, N-terminal PEST domain||SH3 domain||-
novel_circ_0026806	3	197015364	197017290	-	1926	518	ENSG00000163975;	exon:197015365-197015516,exon:197016189-197016369,exon:197017103-197017290	MELTF	Transferrin-like domain||Transferrin||Transferrin family, iron binding site
novel_circ_0026805	3	197015364	197016369	-	1005	331	ENSG00000163975;	exon:197015365-197015516,exon:197016189-197016369	MELTF	Transferrin-like domain||Transferrin||Transferrin family, iron binding site
novel_circ_0026804	3	196937014	196939432	-	2418	386	ENSG00000114503;	exon:196937015-196937082,exon:196937510-196937648,exon:196939251-196939432	NCBP2	NCBP2, RNA recognition motif||RNA recognition motif domain||Nucleotide-binding alpha-beta plait domain superfamily||Nuclear cap-binding protein subunit 2||RNA-binding domain superfamily||-
novel_circ_0026800	3	196885150	196903610	+	18460	77	ENSG00000119231;	exon:196903533-196903610	SENP5	Ulp1 protease family, C-terminal catalytic domain||SENP5 peptidase||Papain-like cysteine peptidase superfamily
novel_circ_0009208	15	50574273	50580908	-	6635	149	ENSG00000092439;	exon:50575724-50575789,exon:50575869-50575919,exon:50580874-50580908	TRPM7	TRPM, SLOG domain||Transient receptor potential cation channel subfamily M member 7||TRPM, tetramerisation domain superfamily||TRPM, tetramerisation domain||Protein kinase-like domain superfamily||Ion transport domain||MHCK/EF2 kinase
novel_circ_0009209	15	50574273	50583159	-	8886	275	ENSG00000092439;	exon:50574274-50574479,exon:50583089-50583159	TRPM7	TRPM, SLOG domain||Transient receptor potential cation channel subfamily M member 7||TRPM, tetramerisation domain superfamily||TRPM, tetramerisation domain||Protein kinase-like domain superfamily||Ion transport domain||MHCK/EF2 kinase
novel_circ_0009207	15	50574273	50578664	-	4391	140	ENSG00000092439;	exon:50575724-50575789,exon:50575869-50575919,exon:50578639-50578664	TRPM7	TRPM, SLOG domain||Transient receptor potential cation channel subfamily M member 7||TRPM, tetramerisation domain superfamily||TRPM, tetramerisation domain||Protein kinase-like domain superfamily||Ion transport domain||MHCK/EF2 kinase
novel_circ_0009201	15	50471632	50484361	+	12729	162	ENSG00000138592;	exon:50471633-50471795	USP8	USP8 dimerisation domain||Ubiquitin specific protease domain||Ubiquitin specific protease, conserved site||Rhodanese-like domain||-||Papain-like cysteine peptidase superfamily||Peptidase C19, ubiquitin carboxyl-terminal hydrolase||Rhodanese-like domain superfamily
hsa_circ_0062645	22	25455711	25459515	+	3804	372	ENSG00000100058;	exon:25455712-25455840,exon:25459416-25459515	--	-
novel_circ_0001459	10	68913161	68914204	+	1043	262	ENSG00000107625;	exon:68913162-68913279,exon:68914059-68914204	DDX50	GUCT||-||RNA-binding domain superfamily||P-loop containing nucleoside triphosphate hydrolase||DEAD/DEAH box helicase domain||RNA helicase, DEAD-box type, Q motif||Helicase, C-terminal||Helicase superfamily 1/2, ATP-binding domain
novel_circ_0001458	10	68911067	68919981	+	8914	178	ENSG00000107625;	exon:68911068-68911246	DDX50	GUCT||-||RNA-binding domain superfamily||P-loop containing nucleoside triphosphate hydrolase||DEAD/DEAH box helicase domain||RNA helicase, DEAD-box type, Q motif||Helicase, C-terminal||Helicase superfamily 1/2, ATP-binding domain
hsa_circ_0062642	22	25375812	25381577	-	5765	393	ENSG00000100068;	exon:25375813-25376008,exon:25381381-25381578	LRP5L	Six-bladed beta-propeller, TolB-like||LDLR class B repeat
novel_circ_0001452	10	68786545	68788328	+	1783	185	ENSG00000060339;	exon:68788143-68788328	CCAR1	Cell cycle and apoptosis regulator protein||SAP domain||EF-hand domain pair||Nucleic acid-binding, OB-fold||S1-like RNA binding domain||SAP domain superfamily||-||DBC1/CARP1 catalytically inactive NUDIX hydrolase domain
novel_circ_0001451	10	68786135	68791341	+	5206	216	ENSG00000060339;	exon:68786136-68786218,exon:68791207-68791341	CCAR1	Cell cycle and apoptosis regulator protein||SAP domain||EF-hand domain pair||Nucleic acid-binding, OB-fold||S1-like RNA binding domain||SAP domain superfamily||-||DBC1/CARP1 catalytically inactive NUDIX hydrolase domain
hsa_circ_0062649	22	25663629	25674528	+	10899	281	ENSG00000100077;	exon:25663630-25663704,exon:25666633-25666720,exon:25667739-25667800,exon:25672296-25672347,exon:25674437-25674528	GRK3	Protein kinase, ATP binding site||Serine/threonine-protein kinase, active site||-||RGS domain||PH-like domain superfamily||AGC-kinase, C-terminal||Pleckstrin homology domain||RGS domain superfamily||GPCR kinase||Protein kinase-like domain superfamily||Protein kinase domain
novel_circ_0001456	10	68906710	68914204	+	7494	441	ENSG00000107625;	exon:68906711-68907007,exon:68914059-68914204	DDX50	GUCT||-||RNA-binding domain superfamily||P-loop containing nucleoside triphosphate hydrolase||DEAD/DEAH box helicase domain||RNA helicase, DEAD-box type, Q motif||Helicase, C-terminal||Helicase superfamily 1/2, ATP-binding domain
novel_circ_0001455	10	68906710	68910382	+	3672	371	ENSG00000107625;	exon:68906711-68907007,exon:68910307-68910382	DDX50	GUCT||-||RNA-binding domain superfamily||P-loop containing nucleoside triphosphate hydrolase||DEAD/DEAH box helicase domain||RNA helicase, DEAD-box type, Q motif||Helicase, C-terminal||Helicase superfamily 1/2, ATP-binding domain
novel_circ_0001454	10	68881957	68892773	+	10816	336	ENSG00000165730;	exon:68881958-68882110,exon:68892589-68892773	STOX1	Storkhead-box protein 1/2||Storkhead-box protein, winged-helix domain
hsa_circ_0052835	2	20253821	20256170	-	2349	579	ENSG00000055917;	exon:20253822-20254014,exon:20254863-20254984,exon:20255216-20255341,exon:20256033-20256170	PUM2	Armadillo-like helical||Armadillo-type fold||Pumilio, RNA binding domain||-||Pumilio homology domain||Pumilio RNA-binding repeat
hsa_circ_0052836	2	20253821	20260466	-	6645	838	ENSG00000055917;	exon:20253822-20254014,exon:20260337-20260466	PUM2	Armadillo-like helical||Armadillo-type fold||Pumilio, RNA binding domain||-||Pumilio homology domain||Pumilio RNA-binding repeat
hsa_circ_0073027	5	74838964	74841679	-	2715	321	ENSG00000198780;	exon:74838965-74839050,exon:74840074-74840173,exon:74841545-74841679	FAM169A	Protein FAM169||Soluble lamin-associated protein of 75kDa||-
hsa_circ_0058051	2	214767481	214797117	-	29636	1410	ENSG00000138376;	exon:214767482-214767654,exon:214769232-214769312,exon:214792297-214792445,exon:214797061-214797117	BARD1	Ankyrin repeat||BRCT domain||-||Ankyrin repeat-containing domain superfamily||BARD1, Zinc finger, RING-type||Zinc finger, RING/FYVE/PHD-type||Ankyrin repeat-containing domain||Zinc finger, RING-type||Zinc finger, RING-type, conserved site||BRCT domain superfamily
hsa_circ_0058050	2	214767481	214792445	-	24964	1353	ENSG00000138376;	exon:214767482-214767654,exon:214792297-214792445	BARD1	Ankyrin repeat||BRCT domain||-||Ankyrin repeat-containing domain superfamily||BARD1, Zinc finger, RING-type||Zinc finger, RING/FYVE/PHD-type||Ankyrin repeat-containing domain||Zinc finger, RING-type||Zinc finger, RING-type, conserved site||BRCT domain superfamily
hsa_circ_0088809	9	128508875	128523846	+	14971	798	ENSG00000119392;	exon:128508876-128509097	GLE1	GLE1-like superfamily||GLE1-like
hsa_circ_0058728	2	232747614	232749082	+	1468	226	ENSG00000204120;	exon:232747615-232747744,exon:232748987-232749082	GIGYF2	GYF-like domain superfamily||-||GYF domain
hsa_circ_0067871	3	168036835	168048365	-	11530	656	ENSG00000173905;	exon:168036836-168036994,exon:168040786-168040869,exon:168044828-168044881,exon:168046950-168046999,exon:168048291-168048365	GOLIM4	-
novel_circ_0007128	14	101991526	102000399	+	8873	146	ENSG00000197102;	exon:101991527-101991673	DYNC1H1	P-loop containing nucleoside triphosphate hydrolase||AAA+ ATPase domain||Dynein heavy chain, coiled coil stalk||Dynein heavy chain, C-terminal domain||Dynein heavy chain, domain-1||-||Dynein heavy chain AAA lid domain||Dynein heavy chain, domain-2||Dynein heavy chain, ATP-binding dynein motor region||Dynein heavy chain, hydrolytic ATP-binding dynein motor region||Dynein heavy chain, AAA module D4…
novel_circ_0007125	14	101901718	101917947	+	16229	116	ENSG00000078304;	exon:101917831-101917947	PPP2R5C	Protein phosphatase 2A, regulatory B subunit, B56||Armadillo-like helical||Armadillo-type fold||-
novel_circ_0007127	14	101991526	101995300	+	3774	515	ENSG00000197102;	exon:101991527-101991673,exon:101994184-101994324,exon:101994986-101995096,exon:101995181-101995300	DYNC1H1	P-loop containing nucleoside triphosphate hydrolase||AAA+ ATPase domain||Dynein heavy chain, coiled coil stalk||Dynein heavy chain, C-terminal domain||Dynein heavy chain, domain-1||-||Dynein heavy chain AAA lid domain||Dynein heavy chain, domain-2||Dynein heavy chain, ATP-binding dynein motor region||Dynein heavy chain, hydrolytic ATP-binding dynein motor region||Dynein heavy chain, AAA module D4…
novel_circ_0007126	14	101983018	101987632	+	4614	179	ENSG00000197102;	exon:101987453-101987632	DYNC1H1	P-loop containing nucleoside triphosphate hydrolase||AAA+ ATPase domain||Dynein heavy chain, coiled coil stalk||Dynein heavy chain, C-terminal domain||Dynein heavy chain, domain-1||-||Dynein heavy chain AAA lid domain||Dynein heavy chain, domain-2||Dynein heavy chain, ATP-binding dynein motor region||Dynein heavy chain, hydrolytic ATP-binding dynein motor region||Dynein heavy chain, AAA module D4…
novel_circ_0007121	14	101882160	101912473	+	30313	72	ENSG00000078304;	exon:101912401-101912473	PPP2R5C	Protein phosphatase 2A, regulatory B subunit, B56||Armadillo-like helical||Armadillo-type fold||-
novel_circ_0007120	14	101355032	101363524	-	8492	142	n/a	intergenic_region:101355033-101355175	--	-
novel_circ_0007123	14	101892999	101909690	+	16691	101	ENSG00000078304;	exon:101909589-101909690	PPP2R5C	Protein phosphatase 2A, regulatory B subunit, B56||Armadillo-like helical||Armadillo-type fold||-
hsa_circ_0075740	6	17674904	17675770	-	866	518	ENSG00000124789;	exon:17674905-17675033	NUP153	Nucleoporin Nup153, N-terminal||Retro-transposon transporting motif||Zinc finger, RanBP2-type||Nuclear pore complex protein||Zinc finger, RanBP2-type superfamily
hsa_circ_0078110	6	144531051	144542870	+	11819	689	ENSG00000152818;	exon:144531052-144531202,exon:144539294-144539443,exon:144542795-144542870	UTRN	Actinin-type actin-binding domain, conserved site||EF-hand domain, type 2||Zinc finger, ZZ-type||Dystrophin/utrophin||WW domain||EF-hand domain pair||EF-hand domain, type 1||Spectrin/alpha-actinin||CH domain superfamily||Calponin homology domain||WW domain superfamily||-||Spectrin repeat
hsa_circ_0044644	17	50989676	50990668	-	992	415	ENSG00000008294;	exon:50989677-50989872	SPAG9	WD40-repeat-containing domain superfamily||RH1 domain||WD40/YVTN repeat-like-containing domain superfamily||JNK/Rab-associated protein-1, N-terminal||JNK-interacting protein, leucine zipper II||RH2 domain||JNK-interacting protein 3/4||-
hsa_circ_0044647	17	50990449	50998617	-	8168	953	ENSG00000008294;	exon:50998444-50998617	SPAG9	WD40-repeat-containing domain superfamily||RH1 domain||WD40/YVTN repeat-like-containing domain superfamily||JNK/Rab-associated protein-1, N-terminal||JNK-interacting protein, leucine zipper II||RH2 domain||JNK-interacting protein 3/4||-
hsa_circ_0044646	17	50990449	50993935	-	3486	391	ENSG00000008294;	exon:50990450-50990668,exon:50993764-50993935	SPAG9	WD40-repeat-containing domain superfamily||RH1 domain||WD40/YVTN repeat-like-containing domain superfamily||JNK/Rab-associated protein-1, N-terminal||JNK-interacting protein, leucine zipper II||RH2 domain||JNK-interacting protein 3/4||-
hsa_circ_0075748	6	17771907	17779099	-	7192	537	ENSG00000137177;	exon:17771908-17772059	KIF13A	SMAD/FHA domain superfamily||Kinesin-like protein||Kinesin motor domain, conserved site||Kinesin-like protein KIF13A||Kinesin motor domain superfamily||Kinesin-associated||Kinesin-like protein KIF13B||Kinesin-like||Kinesin-like KIF1-type||P-loop containing nucleoside triphosphate hydrolase||Kinesin motor domain||Forkhead-associated (FHA) domain
hsa_circ_0091995	X	154361978	154362332	-	354	261	ENSG00000196924;	exon:154361979-154362148,exon:154362242-154362332	FLNA	-||Filamin/ABP280 repeat-like||Immunoglobulin-like fold||Calponin homology domain||CH domain superfamily||Immunoglobulin E-set||Filamin/ABP280 repeat||Actinin-type actin-binding domain, conserved site
hsa_circ_0043143	17	35834565	35838553	+	3988	273	ENSG00000270647;	exon:35834566-35834598,exon:35836132-35836241,exon:35838424-35838553	TAF15	RNA-binding domain superfamily||Zinc finger, RanBP2-type||-||TAF15/EWS/TLS family||RNA recognition motif domain||Nucleotide-binding alpha-beta plait domain superfamily||Zinc finger, RanBP2-type superfamily||TATA binding associated factor 15
hsa_circ_0043142	17	35833906	35838553	+	4647	308	ENSG00000270647;	exon:35833907-35833941,exon:35834566-35834598,exon:35836132-35836241,exon:35838424-35838553	TAF15	RNA-binding domain superfamily||Zinc finger, RanBP2-type||-||TAF15/EWS/TLS family||RNA recognition motif domain||Nucleotide-binding alpha-beta plait domain superfamily||Zinc finger, RanBP2-type superfamily||TATA binding associated factor 15
hsa_circ_0068690	3	197104902	197130671	-	25769	526	ENSG00000075711;	exon:197130527-197130671	DLG1	L27 domain superfamily||SH3-like domain superfamily||PDZ domain||PDZ-associated domain of NMDA receptors||Disks large 1-like||PDZ superfamily||Guanylate kinase-like domain||L27-1||L27 domain||Guanylate kinase/L-type calcium channel beta subunit||P-loop containing nucleoside triphosphate hydrolase||Guanylate kinase, conserved site||Disks large homologue 1, N-terminal PEST domain||SH3 domain||-
hsa_circ_0068692	3	197115926	197149796	-	33870	960	ENSG00000075711;	exon:197115927-197116024,exon:197130527-197130671,exon:197142718-197142768,exon:197149743-197149796	DLG1	L27 domain superfamily||SH3-like domain superfamily||PDZ domain||PDZ-associated domain of NMDA receptors||Disks large 1-like||PDZ superfamily||Guanylate kinase-like domain||L27-1||L27 domain||Guanylate kinase/L-type calcium channel beta subunit||P-loop containing nucleoside triphosphate hydrolase||Guanylate kinase, conserved site||Disks large homologue 1, N-terminal PEST domain||SH3 domain||-
hsa_circ_0068697	3	197119409	197142768	-	23359	749	ENSG00000075711;	exon:197119410-197119530,exon:197140140-197140264,exon:197142718-197142768	DLG1	L27 domain superfamily||SH3-like domain superfamily||PDZ domain||PDZ-associated domain of NMDA receptors||Disks large 1-like||PDZ superfamily||Guanylate kinase-like domain||L27-1||L27 domain||Guanylate kinase/L-type calcium channel beta subunit||P-loop containing nucleoside triphosphate hydrolase||Guanylate kinase, conserved site||Disks large homologue 1, N-terminal PEST domain||SH3 domain||-
hsa_circ_0068699	3	197136541	197142768	-	6227	483	ENSG00000075711;	exon:197136542-197136678,exon:197138215-197138391,exon:197140140-197140264,exon:197142718-197142768	DLG1	L27 domain superfamily||SH3-like domain superfamily||PDZ domain||PDZ-associated domain of NMDA receptors||Disks large 1-like||PDZ superfamily||Guanylate kinase-like domain||L27-1||L27 domain||Guanylate kinase/L-type calcium channel beta subunit||P-loop containing nucleoside triphosphate hydrolase||Guanylate kinase, conserved site||Disks large homologue 1, N-terminal PEST domain||SH3 domain||-
novel_circ_0013763	18	26292245	26295314	+	3069	359	ENSG00000141384;	exon:26292246-26292381,exon:26293426-26293531,exon:26295195-26295314	TAF4B	TAFH/NHR1||TAFH/NHR1 domain superfamily||Histone-fold||-||Transcription initiation factor TFIID component TAF4
novel_circ_0024516	2	69354488	69374113	-	19625	354	ENSG00000198380;	exon:69354489-69354568,exon:69356496-69356557,exon:69370001-69370108,exon:69374006-69374113	GFPT1	Glucosamine-fructose-6-phosphate aminotransferase, isomerising||GlmS/FrlB, SIS domain 2||Glutamine amidotransferase type 2 domain||Sugar isomerase (SIS)||GlmS/AgaS, SIS domain 1||Nucleophile aminohydrolases, N-terminal
novel_circ_0013760	18	26265169	26282060	+	16891	356	ENSG00000141384;	exon:26265170-26265315,exon:26274931-26275053,exon:26281971-26282060	TAF4B	TAFH/NHR1||TAFH/NHR1 domain superfamily||Histone-fold||-||Transcription initiation factor TFIID component TAF4
novel_circ_0024519	2	69358328	69370108	-	11780	366	ENSG00000198380;	exon:69358329-69358463,exon:69363545-69363670,exon:69370001-69370108	GFPT1	Glucosamine-fructose-6-phosphate aminotransferase, isomerising||GlmS/FrlB, SIS domain 2||Glutamine amidotransferase type 2 domain||Sugar isomerase (SIS)||GlmS/AgaS, SIS domain 1||Nucleophile aminohydrolases, N-terminal
hsa_circ_0011227	1	30945345	30950261	-	4916	273	ENSG00000134644;	exon:30950127-30950261	PUM1	Armadillo-like helical||Armadillo-type fold||-||Pumilio, RNA binding domain||Pumilio homology domain||Pumilio RNA-binding repeat
hsa_circ_0089863	X	9937133	9937685	+	552	552	ENSG00000146950;	exon:9937134-9937685	SHROOM2	Apx/Shrm Domain 1||Shroom2||Shroom family||PDZ superfamily||Apx/Shrm Domain 2||PDZ domain
hsa_circ_0089866	X	10063444	10110020	+	46576	1068	ENSG00000047644;	exon:10063445-10063554,exon:10109778-10110020	WWC3	WWC, C2 domain||C2 domain superfamily
novel_circ_0034359	7	105548635	105551707	+	3072	211	ENSG00000135249;	exon:105548636-105548710,exon:105551570-105551707	RINT1	-||RINT-1/Tip20
novel_circ_0031188	5	32143748	32170768	-	27020	282	ENSG00000113384;	intron:32143749-32143880,intron:32170617-32170768	GOLPH3	Golgi phosphoprotein 3-like||Golgi phosphoprotein 3-like domain superfamily||-
hsa_circ_0089865	X	10063444	10094281	+	30837	751	ENSG00000047644;	exon:10063445-10063554,exon:10067287-10067490,exon:10094132-10094281	WWC3	WWC, C2 domain||C2 domain superfamily
novel_circ_0031184	5	32121494	32126636	-	5142	166	n/a	intergenic_region:32121495-32121579,intergenic_region:32121860-32121942	--	-
novel_circ_0031185	5	32121494	32143880	-	22386	245	n/a	intergenic_region:32135572-32135686,intergenic_region:32143749-32143880	--	-
novel_circ_0031182	5	31995575	32000271	+	4696	274	ENSG00000133401;	exon:31995576-31995718,exon:32000139-32000271	PDZD2	PDZ domain||-||PDZ superfamily
hsa_circ_0020941	11	4074501	4086543	+	12042	750	ENSG00000167323;	exon:4074502-4074679,exon:4086477-4086543	STIM1	Stromal interaction molecule 1, SAM domain||Sterile alpha motif/pointed domain superfamily||Sterile alpha motif domain||Stromal interaction molecule 1||Stromal interaction molecule, Orai1-activating region||Stromal interaction molecule
novel_circ_0031181	5	31983154	31983656	+	502	501	ENSG00000133401;	exon:31983155-31983656	PDZD2	PDZ domain||-||PDZ superfamily
novel_circ_0000479	10	12529821	12553356	+	23535	194	ENSG00000183049;	intron:12529822-12529945,intron:12538265-12538336	CAMK1D	Protein kinase domain||Protein kinase-like domain superfamily||Serine/threonine-protein kinase, active site||Protein kinase, ATP binding site
novel_circ_0022919	2	213049712	213057099	-	7387	355	ENSG00000030419;	exon:213049713-213049880,exon:213056911-213057099	IKZF2	-||Zinc finger C2H2-type||Zinc finger C2H2 superfamily
hsa_circ_0083741	8	26362683	26366406	+	3723	427	ENSG00000221914;	exon:26362684-26362848,exon:26366315-26366406	PPP2R2A	WD40/YVTN repeat-like-containing domain superfamily||-||Protein phosphatase 2A regulatory subunit PR55||WD40-repeat-containing domain superfamily||WD40 repeat||Protein phosphatase 2A regulatory subunit PR55, conserved site
novel_circ_0022911	2	211619176	211630594	-	11418	352	ENSG00000178568;	exon:211619177-211619275,exon:211623922-211624044,exon:211630462-211630594	ERBB4	Growth factor receptor domain 4||Furin-like repeat||Tyrosine protein kinase, EGF/ERB/XmrK receptor||Protein kinase, ATP binding site||Tyrosine-protein kinase, active site||Receptor L-domain||Serine-threonine/tyrosine-protein kinase, catalytic domain||Protein kinase-like domain superfamily||Protein kinase domain||Receptor L-domain superfamily||Furin-like cysteine-rich domain||Growth factor recepto…
novel_circ_0022913	2	212892684	212936867	-	44183	307	ENSG00000273118;	intron:212892685-212892809,intron:212903381-212903443,intron:212936746-212936867	--	-
novel_circ_0022917	2	213021992	213057099	-	35107	403	ENSG00000030419;	exon:213021993-213022130,exon:213056833-213057099	IKZF2	-||Zinc finger C2H2-type||Zinc finger C2H2 superfamily
novel_circ_0039665	X	101023469	101042312	-	18843	216	ENSG00000188917;	exon:101023470-101023616,exon:101035613-101035683	TRMT2B	S-adenosyl-L-methionine-dependent methyltransferase||(Uracil-5)-methyltransferase family||tRNA (uracil-5-)-methyltransferase, metazoa
novel_circ_0039664	X	101021967	101042312	-	20345	94	ENSG00000188917;	exon:101021968-101022062	TRMT2B	S-adenosyl-L-methionine-dependent methyltransferase||(Uracil-5)-methyltransferase family||tRNA (uracil-5-)-methyltransferase, metazoa
novel_circ_0031452	5	55343330	55353269	+	9939	323	ENSG00000039123;	exon:55343331-55343455,exon:55344522-55344620,exon:55353168-55353269	MTREX	Helicase superfamily 1/2, ATP-binding domain||Helicase, C-terminal||ATP-dependent RNA helicase Ski2, C-terminal||ATP-dependent RNA helicase Ski2-like||DEAD/DEAH box helicase domain||rRNA-processing arch domain||P-loop containing nucleoside triphosphate hydrolase||-
novel_circ_0031453	5	55343330	55358698	+	15368	448	ENSG00000039123;	exon:55343331-55343455,exon:55344522-55344620,exon:55353168-55353269,exon:55358573-55358698	MTREX	Helicase superfamily 1/2, ATP-binding domain||Helicase, C-terminal||ATP-dependent RNA helicase Ski2, C-terminal||ATP-dependent RNA helicase Ski2-like||DEAD/DEAH box helicase domain||rRNA-processing arch domain||P-loop containing nucleoside triphosphate hydrolase||-
novel_circ_0031455	5	55347012	55366875	+	19863	131	ENSG00000039123;	exon:55347013-55347144	MTREX	Helicase superfamily 1/2, ATP-binding domain||Helicase, C-terminal||ATP-dependent RNA helicase Ski2, C-terminal||ATP-dependent RNA helicase Ski2-like||DEAD/DEAH box helicase domain||rRNA-processing arch domain||P-loop containing nucleoside triphosphate hydrolase||-
hsa_circ_0065112	3	45979704	45985022	-	5318	400	ENSG00000163820;	exon:45984856-45985022	FYCO1	RUN domain superfamily||Zinc finger, RING/FYVE/PHD-type||RUN domain||GOLD domain||GOLD domain superfamily||Zinc finger, FYVE-related||Zinc finger, FYVE/PHD-type||FYVE zinc finger
novel_circ_0031458	5	55353167	55366875	+	13708	101	ENSG00000039123;	exon:55353168-55353269	MTREX	Helicase superfamily 1/2, ATP-binding domain||Helicase, C-terminal||ATP-dependent RNA helicase Ski2, C-terminal||ATP-dependent RNA helicase Ski2-like||DEAD/DEAH box helicase domain||rRNA-processing arch domain||P-loop containing nucleoside triphosphate hydrolase||-
novel_circ_0031459	5	55366724	55379195	+	12471	218	ENSG00000039123;	exon:55366725-55366875,exon:55379127-55379195	MTREX	Helicase superfamily 1/2, ATP-binding domain||Helicase, C-terminal||ATP-dependent RNA helicase Ski2, C-terminal||ATP-dependent RNA helicase Ski2-like||DEAD/DEAH box helicase domain||rRNA-processing arch domain||P-loop containing nucleoside triphosphate hydrolase||-
novel_circ_0036868	8	17653185	17654666	-	1481	95	ENSG00000129422;	exon:17653186-17653281	MTUS1	Microtubule-associated tumour suppressor 1||-
novel_circ_0036869	8	17653185	17656065	-	2880	297	ENSG00000129422;	exon:17653186-17653281,exon:17655863-17656065	MTUS1	Microtubule-associated tumour suppressor 1||-
novel_circ_0036866	8	17649845	17654666	-	4821	211	ENSG00000129422;	exon:17649846-17649962,exon:17653186-17653281	MTUS1	Microtubule-associated tumour suppressor 1||-
novel_circ_0036867	8	17649845	17656065	-	6220	318	ENSG00000129422;	exon:17649846-17649962,exon:17655863-17656065	MTUS1	Microtubule-associated tumour suppressor 1||-
hsa_circ_0004285	6	118826146	118856545	-	30399	811	ENSG00000111877;	exon:118826147-118826292,exon:118856371-118856545	MCM9	MCM domain||MCM OB domain||MCM, AAA-lid domain||Mini-chromosome maintenance protein||-||P-loop containing nucleoside triphosphate hydrolase||AAA+ ATPase domain||Nucleic acid-binding, OB-fold
novel_circ_0032199	6	107039748	107040230	+	482	481	ENSG00000130349;	exon:107039749-107040230	C6orf203	Uncharacterized protein C6orf203
hsa_circ_0004287	11	65502320	65504595	+	2275	2275	ENSG00000251562;	exon:65504326-65504595	--	-
hsa_circ_0004286	9	112124256	112157613	-	33357	783	ENSG00000106868;	exon:112124257-112124436,exon:112157500-112157613	SUSD1	-||EGF-type aspartate/asparagine hydroxylation site||Sushi/SCR/CCP domain||EGF-like domain||EGF-like calcium-binding domain||EGF-like calcium-binding, conserved site||EGF-like, conserved site||Growth factor receptor cysteine-rich domain superfamily||Sushi/SCR/CCP superfamily
hsa_circ_0004281	10	13659322	13663509	-	4187	463	ENSG00000151474;	exon:13659323-13659490,exon:13663453-13663509	FRMD4A	FERM superfamily, second domain||-||PH-like domain superfamily||FERM central domain||Ubiquitin-like domain superfamily||FERM conserved site||FERM, N-terminal||Domain of unknown function DUF3338||Band 4.1 domain||FERM, C-terminal PH-like domain||FRMD4A/B, FERM domain C-lobe||FERM domain||FERM/acyl-CoA-binding protein superfamily
hsa_circ_0004280	1	47287550	47300152	-	12602	680	ENSG00000123473;	exon:47287551-47287660,exon:47289435-47289585,exon:47295765-47295848,exon:47299905-47300152	STIL	SCL-interrupting locus protein
hsa_circ_0004282	12	54241743	54257692	-	15949	629	ENSG00000094916;	exon:54241744-54241905	CBX5	Chromo/chromo shadow domain||Chromo shadow domain||Chromo domain subgroup||Chromo domain||Chromo domain, conserved site||Chromo-like domain superfamily
novel_circ_0032193	6	106560802	106568971	+	8169	281	ENSG00000112297;	exon:106560803-106560926,exon:106561342-106561500	CRYBG1	Ricin B-like lectins||Beta/gamma crystallin||Gamma-crystallin-like||-||Ricin B, lectin domain
hsa_circ_0004289	1	32030297	32045390	+	15093	3716	ENSG00000121774;	exon:32030298-32030422,exon:32045331-32045390	KHDRBS1	KHDRBS, Qua1 domain||K Homology domain||K Homology domain, type 1||K Homology domain, type 1 superfamily||Sam68, tyrosine-rich domain
hsa_circ_0004288	6	111472012	111474479	-	2467	2467	ENSG00000009413;	intron:111472013-111472140,intron:111474246-111474479	REV3L	Ribonuclease H-like superfamily||-||Domain of unknown function DUF1725||Ribonuclease H superfamily||DNA-directed DNA polymerase, family B, exonuclease domain||DNA polymerase family B, C-terminal domain||DNA-directed DNA polymerase, family B, multifunctional domain||DNA-directed DNA polymerase, family B||DNA-directed DNA polymerase, family B, conserved site||Domain of unknown function DUF4683||DNA…
novel_circ_0032196	6	10697323	10702639	+	5316	236	ENSG00000111845;	exon:10697324-10697486,exon:10702565-10702639	PAK1IP1	WD40/YVTN repeat-like-containing domain superfamily||G-protein beta WD-40 repeat||WD40 repeat, conserved site||WD40 repeat||WD40-repeat-containing domain superfamily||WD40-repeat-containing domain
hsa_circ_0007888	20	5176647	5178956	+	2309	238	ENSG00000101290;	exon:5176648-5176745,exon:5178817-5178956	CDS2	Phosphatidate cytidylyltransferase, eukaryota||Phosphatidate cytidylyltransferase
hsa_circ_0007889	12	53027781	53028188	+	407	312	ENSG00000063046;	exon:53028015-53028188	EIF4B	RNA recognition motif domain||Nucleotide-binding alpha-beta plait domain superfamily||Eukaryotic translation initiation factor 4B||RNA-binding domain superfamily||-
hsa_circ_0007882	17	29482196	29491865	+	9669	268	ENSG00000160551;	exon:29482197-29482288,exon:29489664-29489757,exon:29491284-29491330,exon:29491784-29491865	TAOK1	Protein kinase, ATP binding site||Protein kinase domain||Protein kinase-like domain superfamily||Serine/threonine-protein kinase, active site
hsa_circ_0007887	X	71397252	71398737	+	1485	380	ENSG00000147133;	exon:71397253-71397466,exon:71398572-71398737	TAF1	Zinc knuckle||-||Transcription initiation factor TFIID subunit 1||Bromodomain, conserved site||Transcription initiation factor TFIID subunit 1, animal||TAFII-230 TBP-binding||Bromodomain||Transcription initiation factor TFIID subunit 1, domain of unknown function||Bromodomain-like superfamily||TAFII-230 TBP-binding domain superfamily
hsa_circ_0007884	8	37835173	37837939	+	2766	651	ENSG00000020181;	exon:37837731-37837939	ADGRA2	GPCR, family 2, secretin-like, conserved site||Cysteine-rich flanking region, C-terminal||GPCR, family 2, extracellular hormone receptor domain||Leucine-rich repeat, typical subtype||Leucine-rich repeat||Immunoglobulin-like fold||GPCR family 2, extracellular hormone receptor domain superfamily||Leucine-rich repeat domain superfamily||GPS motif||GPCR, family 2, secretin-like||Immunoglobulin-like d…
hsa_circ_0007885	12	111658735	111659345	-	610	249	ENSG00000089234;	exon:111658736-111658845,exon:111659207-111659345	BRAP	Zinc finger, UBP-type||BRAP2, RNA recognition motif||Zinc finger, RING-type||BRCA1-associated 2||RNA-binding domain superfamily||Zinc finger, RING/FYVE/PHD-type
novel_circ_0025644	3	138681966	138699095	-	17129	496	ENSG00000051382;	exon:138681967-138682045,exon:138683678-138683787,exon:138694786-138694907,exon:138698907-138699095	PIK3CB	Phosphatidylinositol kinase||Phosphatidylinositol 3/4-kinase, conserved site||Armadillo-type fold||Ubiquitin-like domain superfamily||Phosphatidylinositol 3-/4-kinase, catalytic domain||Phosphatidylinositol 3-kinase adaptor-binding (PI3K ABD) domain||Phosphatidylinositol 3-/4-kinase, catalytic domain superfamily||-||Phosphatidylinositol 3-kinase Ras-binding (PI3K RBD) domain||Phosphoinositide 3-k…
novel_circ_0025645	3	138681966	138712304	-	30338	283	ENSG00000051382;	exon:138681967-138682045,exon:138683678-138683787,exon:138712208-138712304	PIK3CB	Phosphatidylinositol kinase||Phosphatidylinositol 3/4-kinase, conserved site||Armadillo-type fold||Ubiquitin-like domain superfamily||Phosphatidylinositol 3-/4-kinase, catalytic domain||Phosphatidylinositol 3-kinase adaptor-binding (PI3K ABD) domain||Phosphatidylinositol 3-/4-kinase, catalytic domain superfamily||-||Phosphatidylinositol 3-kinase Ras-binding (PI3K RBD) domain||Phosphoinositide 3-k…
novel_circ_0025646	3	138683677	138688974	-	5297	99	ENSG00000051382;	exon:138688875-138688974	PIK3CB	Phosphatidylinositol kinase||Phosphatidylinositol 3/4-kinase, conserved site||Armadillo-type fold||Ubiquitin-like domain superfamily||Phosphatidylinositol 3-/4-kinase, catalytic domain||Phosphatidylinositol 3-kinase adaptor-binding (PI3K ABD) domain||Phosphatidylinositol 3-/4-kinase, catalytic domain superfamily||-||Phosphatidylinositol 3-kinase Ras-binding (PI3K RBD) domain||Phosphoinositide 3-k…
novel_circ_0025647	3	138683677	138691143	-	7466	242	ENSG00000051382;	exon:138688875-138688974,exon:138691000-138691143	PIK3CB	Phosphatidylinositol kinase||Phosphatidylinositol 3/4-kinase, conserved site||Armadillo-type fold||Ubiquitin-like domain superfamily||Phosphatidylinositol 3-/4-kinase, catalytic domain||Phosphatidylinositol 3-kinase adaptor-binding (PI3K ABD) domain||Phosphatidylinositol 3-/4-kinase, catalytic domain superfamily||-||Phosphatidylinositol 3-kinase Ras-binding (PI3K RBD) domain||Phosphoinositide 3-k…
hsa_circ_0027703	12	89491935	89497342	-	5407	352	ENSG00000139323;	exon:89491936-89492115,exon:89497171-89497342	POC1B	G-protein beta WD-40 repeat||WD40 repeat, conserved site||WD40/YVTN repeat-like-containing domain superfamily||-||WD40-repeat-containing domain superfamily||WD40 repeat||WD40-repeat-containing domain
hsa_circ_0080217	7	51190849	51193589	-	2740	440	ENSG00000106078;	exon:51193379-51193589	COBL	Cordon-bleu, ubiquitin-like domain||Protein cordon-bleu-like||Ubiquitin-like domain superfamily||WH2 domain
hsa_circ_0027700	12	88505158	88518867	-	13709	667	ENSG00000049130;	exon:88505159-88505235,exon:88506311-88506378,exon:88518697-88518867	KITLG	-||Four-helical cytokine-like, core||Stem cell factor
hsa_circ_0080212	7	50703820	50705323	-	1503	272	ENSG00000106070;	exon:50703821-50703908,exon:50705140-50705323	GRB10	Ubiquitin-like domain superfamily||BPS (Between PH and SH2) domain||Growth factor receptor-bound protein 10||PH-like domain superfamily||APBB1IP, PH domain||SH2 domain superfamily||SH2 domain||-||GRB/APBB1IP||Ras-associating (RA) domain||Pleckstrin homology domain||Grb10, SH2
hsa_circ_0080213	7	50703820	50756056	-	52236	258	ENSG00000106070;	exon:50703821-50703908,exon:50755887-50756056	GRB10	Ubiquitin-like domain superfamily||BPS (Between PH and SH2) domain||Growth factor receptor-bound protein 10||PH-like domain superfamily||APBB1IP, PH domain||SH2 domain superfamily||SH2 domain||-||GRB/APBB1IP||Ras-associating (RA) domain||Pleckstrin homology domain||Grb10, SH2
hsa_circ_0080210	7	50669721	50705323	-	35602	637	ENSG00000106070;	exon:50669722-50669863,exon:50705140-50705323	GRB10	Ubiquitin-like domain superfamily||BPS (Between PH and SH2) domain||Growth factor receptor-bound protein 10||PH-like domain superfamily||APBB1IP, PH domain||SH2 domain superfamily||SH2 domain||-||GRB/APBB1IP||Ras-associating (RA) domain||Pleckstrin homology domain||Grb10, SH2
novel_circ_0037117	8	38249707	38252287	+	2580	366	ENSG00000085788;	exon:38249708-38249803,exon:38251912-38252028,exon:38252132-38252287	DDHD2	WWE domain||Sterile alpha motif domain||Sterile alpha motif/pointed domain superfamily||WWE domain superfamily||DDHD domain||-
novel_circ_0030320	5	123545416	123553147	+	7731	114	ENSG00000151292;	exon:123550228-123550302,exon:123553107-123553147	CSNK1G3	Protein kinase, ATP binding site||Casein kinase 1 gamma C-terminal||Protein kinase-like domain superfamily||Protein kinase domain||Serine/threonine-protein kinase, active site
novel_circ_0037115	8	38247712	38261599	+	13887	385	ENSG00000085788;	exon:38247713-38247835,exon:38249708-38249803,exon:38260040-38260147,exon:38261538-38261599	DDHD2	WWE domain||Sterile alpha motif domain||Sterile alpha motif/pointed domain superfamily||WWE domain superfamily||DDHD domain||-
novel_circ_0037111	8	38242249	38263686	+	21437	209	ENSG00000085788;	intron:38261538-38261599,intron:38263538-38263686	DDHD2	WWE domain||Sterile alpha motif domain||Sterile alpha motif/pointed domain superfamily||WWE domain superfamily||DDHD domain||-
hsa_circ_0088020	9	111430546	111444494	-	13948	777	ENSG00000136813;	exon:111430547-111430628,exon:111433233-111433372	ECPAS	Proteasome component Ecm29||Armadillo-like helical||Vacuole morphology and inheritance protein 14, Fab1-binding region||Armadillo-type fold
hsa_circ_0088023	9	111433232	111442424	-	9192	578	ENSG00000136813;	exon:111433233-111433372,exon:111442306-111442424	ECPAS	Proteasome component Ecm29||Armadillo-like helical||Vacuole morphology and inheritance protein 14, Fab1-binding region||Armadillo-type fold
hsa_circ_0088025	9	111440371	111444494	-	4123	386	ENSG00000136813;	exon:111440372-111440521,exon:111442306-111442424,exon:111444378-111444494	ECPAS	Proteasome component Ecm29||Armadillo-like helical||Vacuole morphology and inheritance protein 14, Fab1-binding region||Armadillo-type fold
hsa_circ_0088026	9	111440371	111451555	-	11184	517	ENSG00000136813;	exon:111440372-111440521,exon:111442306-111442424,exon:111444378-111444494,exon:111451425-111451555	ECPAS	Proteasome component Ecm29||Armadillo-like helical||Vacuole morphology and inheritance protein 14, Fab1-binding region||Armadillo-type fold
novel_circ_0016863	1	201857095	201858994	+	1899	343	ENSG00000198700;	exon:201857096-201857194,exon:201858447-201858553,exon:201858855-201858994	IPO9	-||Armadillo-type fold||Importin-beta, N-terminal domain
novel_circ_0016860	1	201852103	201858994	+	6891	419	ENSG00000198700;	exon:201852104-201852192,exon:201853011-201853097,exon:201858447-201858553,exon:201858855-201858994	IPO9	-||Armadillo-type fold||Importin-beta, N-terminal domain
novel_circ_0016866	1	201996146	202000015	+	3869	116	ENSG00000176393;	exon:201996147-201996263	RNPEP	Armadillo-type fold||Peptidase M1, membrane alanine aminopeptidase||-||Peptidase M1, alanine aminopeptidase/leukotriene A4 hydrolase||Peptidase M4/M1, CTD superfamily||Peptidase M1, leukotriene A4 hydrolase/aminopeptidase C-terminal||Peptidase M1 LTA-4 hydrolase/aminopeptidase, C-terminal domain superfamily||Peptidase M1, aminopeptidase B||Aminopeptidase, leukotriene A4 hydrolase-like||Aminopepti…
hsa_circ_0053829	2	32510525	32513154	+	2629	331	ENSG00000115760;	exon:32510526-32510634,exon:32512933-32513154	BIRC6	BIR repeat||-||Ubiquitin-conjugating enzyme E2||Baculoviral IAP repeat-containing protein 6||Ubiquitin-conjugating enzyme/RWD-like
novel_circ_0036245	7	98137314	98159425	+	22111	358	ENSG00000164715;	exon:98137315-98137442,exon:98141397-98141541,exon:98159338-98159425	LMTK2	Protein kinase, ATP binding site||Serine-threonine/tyrosine-protein kinase, catalytic domain||Tyrosine-protein kinase, active site||Protein kinase domain||Protein kinase-like domain superfamily
novel_circ_0036246	7	98137314	98171674	+	34360	260	ENSG00000164715;	exon:98137315-98137442,exon:98171541-98171674	LMTK2	Protein kinase, ATP binding site||Serine-threonine/tyrosine-protein kinase, catalytic domain||Tyrosine-protein kinase, active site||Protein kinase domain||Protein kinase-like domain superfamily
novel_circ_0036240	7	96208837	96234917	-	26080	254	ENSG00000004864;	exon:96208838-96208977,exon:96234802-96234917	SLC25A13	Mitochondrial substrate/solute carrier||EF-hand domain pair||Mitochondrial carrier domain superfamily||-||Mitochondrial carrier protein||EF-hand domain
novel_circ_0036242	7	96277195	96309691	-	32496	348	ENSG00000004864;	intron:96277196-96277338,intron:96296898-96296951,intron:96309538-96309691	SLC25A13	Mitochondrial substrate/solute carrier||EF-hand domain pair||Mitochondrial carrier domain superfamily||-||Mitochondrial carrier protein||EF-hand domain
novel_circ_0036243	7	97136387	97142818	+	6431	151	ENSG00000196636;	exon:97136388-97136467,exon:97139658-97139730	SDHAF3	Succinate dehydrogenase assembly factor 3, mitochondrial
novel_circ_0036249	7	98244570	98246165	-	1595	122	ENSG00000205356;	exon:98244571-98244693	TECPR1	Peroxin/Ferlin domain||Beta-propeller repeat TECPR||Peroxin domain||-
hsa_circ_0012610	1	53800692	53835620	-	34928	1165	ENSG00000058804;	exon:53835500-53835620	NDC1	Nucleoporin protein Ndc1-Nup
novel_circ_0026348	3	180708767	180725573	-	16806	130	ENSG00000145075;	exon:180711310-180711382,exon:180725515-180725573	--	-
hsa_circ_0019682	10	102143044	102145090	+	2046	183	ENSG00000148840;	exon:102143045-102143098	PPRC1	PGC-1-related coactivator||PGC-1-related coactivator, RNA recognition motif||RNA-binding domain superfamily||PGC-1||Nucleotide-binding alpha-beta plait domain superfamily||RNA recognition motif domain
novel_circ_0026342	3	179719939	179721589	+	1650	281	ENSG00000058056;	exon:179719940-179720034,exon:179721402-179721589	USP13	Ubiquitinyl hydrolase, variant UBP zinc finger||Ubiquitin specific protease domain||Ubiquitin specific protease, conserved site||Peptidase C19, ubiquitin carboxyl-terminal hydrolase||Papain-like cysteine peptidase superfamily||UBA-like superfamily||-||Zinc finger, RING/FYVE/PHD-type||Ubiquitinyl hydrolase||Zinc finger, UBP-type||Ubiquitin-associated domain
novel_circ_0026343	3	179752284	179765848	+	13564	363	ENSG00000058056;	exon:179752285-179752373,exon:179754732-179754854,exon:179765695-179765848	USP13	Ubiquitinyl hydrolase, variant UBP zinc finger||Ubiquitin specific protease domain||Ubiquitin specific protease, conserved site||Peptidase C19, ubiquitin carboxyl-terminal hydrolase||Papain-like cysteine peptidase superfamily||UBA-like superfamily||-||Zinc finger, RING/FYVE/PHD-type||Ubiquitinyl hydrolase||Zinc finger, UBP-type||Ubiquitin-associated domain
novel_circ_0033746	6	56492933	56504098	-	11165	256	ENSG00000151914;	exon:56492934-56493089,exon:56503997-56504098	DST	Plakin repeat superfamily||GAR domain superfamily||SH3 domain||EF-Hand 1, calcium-binding site||Desmoplakin, spectrin-like domain||EF-hand domain||Dystonin-like||Desmoplakin, SH3 domain||-||Spectrin repeat||Plectin repeat||CH domain superfamily||Calponin homology domain||GAR domain||Spectrin/alpha-actinin||EF-hand domain pair||Actinin-type actin-binding domain, conserved site
novel_circ_0033747	6	56578813	56600221	-	21408	385	ENSG00000151914;	exon:56598476-56598709,exon:56600069-56600221	DST	Plakin repeat superfamily||GAR domain superfamily||SH3 domain||EF-Hand 1, calcium-binding site||Desmoplakin, spectrin-like domain||EF-hand domain||Dystonin-like||Desmoplakin, SH3 domain||-||Spectrin repeat||Plectin repeat||CH domain superfamily||Calponin homology domain||GAR domain||Spectrin/alpha-actinin||EF-hand domain pair||Actinin-type actin-binding domain, conserved site
novel_circ_0033744	6	56179577	56182656	-	3079	676	ENSG00000124749;	exon:56179578-56180129,exon:56182531-56182656	COL21A1	Laminin G domain||von Willebrand factor, type A||Collagen triple helix repeat||Concanavalin A-like lectin/glucanase domain superfamily||von Willebrand factor A-like domain superfamily||-
hsa_circ_0005628	2	150486693	150487455	-	762	276	ENSG00000115963;	exon:150486694-150486781,exon:150487268-150487455	RND3	P-loop containing nucleoside triphosphate hydrolase||Small GTPase||Small GTP-binding protein domain||Rho-related GTP-binding protein RhoE||Small GTPase Rho
hsa_circ_0005629	5	157492972	157494795	-	1823	314	ENSG00000135074;	exon:157492973-157493177,exon:157494687-157494795	ADAM19	Disintegrin domain||Peptidase M12B, ADAM/reprolysin||-||Peptidase M12B, propeptide||Disintegrin domain superfamily||ADAM19 peptidase||ADAM, cysteine-rich domain||Disintegrin, conserved site||EGF-like domain||Reprolysin domain, adamalysin-type||Metallopeptidase, catalytic domain superfamily||EGF-like, conserved site
hsa_circ_0005624	10	70152262	70161931	-	9669	826	ENSG00000079332;	exon:70152263-70152592,exon:70161619-70161738,exon:70161858-70161931	SAR1A	Small GTPase superfamily, SAR1-type||P-loop containing nucleoside triphosphate hydrolase||Small GTPase superfamily, ARF/SAR type||Small GTP-binding protein domain
hsa_circ_0005625	2	61876094	61880394	-	4300	647	ENSG00000115484;	exon:61876095-61876234,exon:61880286-61880394	CCT4	Chaperone tailless complex polypeptide 1 (TCP-1)||Chaperonin Cpn60/TCP-1 family||GroEL-like apical domain superfamily||GroEL-like equatorial domain superfamily||Chaperonin TCP-1, conserved site||TCP-1-like chaperonin intermediate domain superfamily||T-complex protein 1, delta subunit
hsa_circ_0005627	16	14593300	14604226	-	10926	216	ENSG00000140694;	exon:14593301-14593378,exon:14599904-14599960,exon:14604146-14604226	PARN	Nucleotide-binding alpha-beta plait domain superfamily||Poly(A)-specific ribonuclease, RNA-binding||Ribonuclease CAF1||RNA-binding domain superfamily||R3H domain superfamily||R3H domain||Ribonuclease H-like superfamily||-||Ribonuclease H superfamily||PARN, R3H domain
hsa_circ_0005620	10	103622469	103661114	-	38646	4865	ENSG00000107957;	exon:103622470-103622553,exon:103627089-103627202,exon:103660772-103660864,exon:103660983-103661114	SH3PXD2A	SH3PXD2A, SH3 domain 4||SH3-like domain superfamily||SH3 and PX domain-containing protein 2A||SH3PXD2A, SH3 domain 3||PX domain superfamily||SH3PXD2A, SH3 domain 2||SH3PXD2, PX domain||SH3PXD2A, SH3 domain 5||Phox homologous domain||SH3 domain||SH3PXD2A, SH3 domain 1
hsa_circ_0005622	22	27853512	27873815	-	20303	549	ENSG00000180957;	exon:27853513-27853663,exon:27854854-27854939	PITPNB	Phosphatidylinositol transfer protein||START-like domain superfamily
hsa_circ_0005623	16	68266592	68275249	+	8657	775	ENSG00000103064;	exon:68266593-68266721,exon:68273795-68273904	SLC7A6	-||Amino acid/polyamine transporter I
hsa_circ_0018484	10	67988662	68014186	-	25524	898	ENSG00000148634;	exon:67988663-67988835,exon:67990211-67990400,exon:67992606-67992682,exon:68014026-68014186	HERC4	HECT, E3 ligase catalytic domain||Regulator of chromosome condensation, RCC1||HECT domain||Regulator of chromosome condensation 1/beta-lactamase-inhibitor protein II||-
hsa_circ_0041452	17	3623338	3624231	-	893	337	ENSG00000197417;ENSG00000262304;	exon:3623339-3623491,exon:3624048-3624231	SHPK;AC027796.3	-
hsa_circ_0013171	1	92693801	92704744	-	10943	948	ENSG00000067208;	exon:92693802-92693899,exon:92694299-92694388,exon:92703395-92703619,exon:92704555-92704744	EVI5	Rab-GTPase-TBC domain superfamily||Rab-GTPase-TBC domain||Ecotropic viral integration site 5 protein
novel_circ_0023808	2	38113360	38131614	+	18254	103	ENSG00000232973;	exon:38131511-38131614	--	-
hsa_circ_0002931	22	28724976	28725367	-	391	273	ENSG00000183765;	exon:28724977-28725124,exon:28725243-28725367	CHEK2	SMAD/FHA domain superfamily||Serine/threonine-protein kinase, active site||-||Protein kinase-like domain superfamily||Protein kinase domain||Forkhead-associated (FHA) domain||Serine-threonine/tyrosine-protein kinase, catalytic domain
hsa_circ_0002932	7	152263015	152265209	-	2194	287	ENSG00000055609;	exon:152263016-152263130,exon:152265038-152265209	KMT2C	Zinc finger, PHD-type||HMG-I/HMG-Y, DNA-binding, conserved site||KMT2C, ePHD2||Post-SET domain||Histone-lysine N-methyltransferase 2C||FY-rich, C-terminal||-||Zinc finger, FYVE/PHD-type||High mobility group box domain superfamily||FY-rich, N-terminal||Zinc finger, RING-type||Zinc finger, PHD-finger||Zinc finger, RING/FYVE/PHD-type||SET domain||KMT2C, ePHD1||High mobility group box domain||Extende…
hsa_circ_0002934	10	87925512	87933251	+	7739	328	ENSG00000171862;	exon:87925513-87925557,exon:87927548-87927599,exon:87931046-87931089,exon:87933013-87933251	PTEN	Protein-tyrosine phosphatase-like||Protein-tyrosine phosphatase, catalytic||Protein-tyrosine phosphatase, active site||Dual specificity phosphatase, catalytic domain||Tensin-type phosphatase domain||Tensin phosphatase, C2 domain||Bifunctional phosphatidylinositol trisphosphate phosphatase/dual specificity phosphatase PTEN
hsa_circ_0039912	16	68038005	68054617	+	16612	326	ENSG00000167264;	exon:68038006-68038149,exon:68049505-68049550,exon:68053564-68053655,exon:68054574-68054617	DUS2	Aldolase-type TIM barrel||-||Double-stranded RNA-binding domain||tRNA-dihydrouridine synthase, conserved site||tRNA-dihydrouridine synthase||DUS-like, FMN-binding domain
novel_circ_0023731	2	36387971	36396787	+	8816	276	ENSG00000150938;	intron:36387972-36388075,intron:36396614-36396787	CRIM1	Insulin-like growth factor-binding protein, IGFBP||Insulin-like growth factor binding protein-related protein (IGFBP-rP), MAC25||VWFC domain||Growth factor receptor cysteine-rich domain superfamily||Hirudin/antistatin||Antistasin-like domain
hsa_circ_0012227	1	45552435	45561878	+	9443	218	ENSG00000117448;	exon:45552436-45552563,exon:45561789-45561878	AKR1A1	NADP-dependent oxidoreductase domain superfamily||Aldo/keto reductase||NADP-dependent oxidoreductase domain||Aldo/keto reductase, conserved site
hsa_circ_0084826	8	86398341	86402203	+	3862	390	ENSG00000123124;	exon:86398342-86398479	WWP1	C2 domain||HECT, E3 ligase catalytic domain||WW domain superfamily||E3 ubiquitin-protein ligase, SMURF1 type||C2 domain superfamily||WW domain||HECT domain
hsa_circ_0084821	8	86380725	86398638	+	17913	469	ENSG00000123124;	exon:86380726-86380864,exon:86381505-86381629	WWP1	C2 domain||HECT, E3 ligase catalytic domain||WW domain superfamily||E3 ubiquitin-protein ligase, SMURF1 type||C2 domain superfamily||WW domain||HECT domain
novel_circ_0020429	21	33810974	33819323	+	8349	82	ENSG00000205726;	exon:33819241-33819323	ITSN1	Dbl homology (DH) domain superfamily||Guanine-nucleotide dissociation stimulator, CDC24, conserved site||PH-like domain superfamily||EH domain||-||EF-hand domain pair||C2 domain||SH3 domain||Dbl homology (DH) domain||EF-hand domain||C2 domain superfamily||EF-Hand 1, calcium-binding site||SH3-like domain superfamily||Pleckstrin homology domain
novel_circ_0020428	21	33765874	33767828	+	1954	252	ENSG00000205726;	exon:33765875-33766012,exon:33767713-33767828	ITSN1	Dbl homology (DH) domain superfamily||Guanine-nucleotide dissociation stimulator, CDC24, conserved site||PH-like domain superfamily||EH domain||-||EF-hand domain pair||C2 domain||SH3 domain||Dbl homology (DH) domain||EF-hand domain||C2 domain superfamily||EF-Hand 1, calcium-binding site||SH3-like domain superfamily||Pleckstrin homology domain
hsa_circ_0038062	16	15691143	15696860	+	5717	424	ENSG00000072864;	exon:15691144-15691323,exon:15694165-15694256,exon:15696709-15696860	NDE1	-||NUDE domain||NUDE family
hsa_circ_0038063	16	15694164	15696860	+	2696	244	ENSG00000072864;	exon:15694165-15694256,exon:15696709-15696860	NDE1	-||NUDE domain||NUDE family
novel_circ_0020425	21	33750142	33767828	+	17686	252	ENSG00000205726;	exon:33765875-33766012,exon:33767713-33767828	ITSN1	Dbl homology (DH) domain superfamily||Guanine-nucleotide dissociation stimulator, CDC24, conserved site||PH-like domain superfamily||EH domain||-||EF-hand domain pair||C2 domain||SH3 domain||Dbl homology (DH) domain||EF-hand domain||C2 domain superfamily||EF-Hand 1, calcium-binding site||SH3-like domain superfamily||Pleckstrin homology domain
novel_circ_0027432	3	47710682	47729094	-	18412	138	ENSG00000173473;	exon:47720666-47720735,exon:47729025-47729094	SMARCC1	SWIRM domain||Homeobox-like domain superfamily||SANT domain||Winged helix-like DNA-binding domain superfamily||BRCT domain superfamily||SMARCC, C-terminal||SMARCC, N-terminal||SANT/Myb domain||SWI/SNF complex subunit SMARCC1||Chromo/chromo shadow domain||-||SMARCC, SWIRM-associated domain
novel_circ_0028618	4	148063147	148072179	+	9032	429	ENSG00000071205;	exon:148063148-148063300,exon:148064416-148064507,exon:148071993-148072179	ARHGAP10	GRAF2, SH3 domain||Rho GTPase activation protein||Pleckstrin homology domain||SH3-like domain superfamily||SH3 domain||AH/BAR domain superfamily||Rho GTPase-activating protein 10||PH-like domain superfamily||Rho GTPase-activating protein domain
novel_circ_0028619	4	148114103	148120288	-	6185	287	ENSG00000151623;	exon:148114104-148114261,exon:148120158-148120288	NR3C2	Zinc finger, nuclear hormone receptor-type||Nuclear hormone receptor-like domain superfamily||-||Zinc finger, NHR/GATA-type||Nuclear hormone receptor, ligand-binding domain
novel_circ_0028614	4	147965023	147966839	+	1816	264	ENSG00000071205;	exon:147965024-147965129,exon:147966680-147966839	ARHGAP10	GRAF2, SH3 domain||Rho GTPase activation protein||Pleckstrin homology domain||SH3-like domain superfamily||SH3 domain||AH/BAR domain superfamily||Rho GTPase-activating protein 10||PH-like domain superfamily||Rho GTPase-activating protein domain
novel_circ_0028615	4	147965023	148023413	+	58390	414	ENSG00000071205;	exon:147965024-147965129,exon:147966680-147966839,exon:148023263-148023413	ARHGAP10	GRAF2, SH3 domain||Rho GTPase activation protein||Pleckstrin homology domain||SH3-like domain superfamily||SH3 domain||AH/BAR domain superfamily||Rho GTPase-activating protein 10||PH-like domain superfamily||Rho GTPase-activating protein domain
novel_circ_0023889	2	40139400	40164984	-	25584	504	ENSG00000183023;	exon:40139401-40139676,exon:40160765-40160864,exon:40164854-40164984	SLC8A1	-||Sodium/calcium exchanger membrane region||Sodium/calcium exchanger domain, C-terminal extension||Sodium/calcium exchanger protein||Na-Ca exchanger/integrin-beta4||CalX-like domain superfamily||DnaJ domain||Sodium/calcium exchanger, isoform 1
novel_circ_0023885	2	40115371	40177855	-	62484	360	ENSG00000183023;	exon:40115372-40115629,exon:40177752-40177855	SLC8A1	-||Sodium/calcium exchanger membrane region||Sodium/calcium exchanger domain, C-terminal extension||Sodium/calcium exchanger protein||Na-Ca exchanger/integrin-beta4||CalX-like domain superfamily||DnaJ domain||Sodium/calcium exchanger, isoform 1
novel_circ_0023881	2	39736582	39737059	-	477	476	ENSG00000138050;	exon:39736583-39737059	THUMPD2	-||THUMP domain||S-adenosyl-L-methionine-dependent methyltransferase||Putative RNA methylase domain
hsa_circ_0042372	17	19542392	19548133	+	5741	320	ENSG00000142494;	exon:19542393-19542494,exon:19547985-19548133	SLC47A1	Multi antimicrobial extrusion protein||-
hsa_circ_0017087	1	235766078	235770297	-	4219	337	ENSG00000143669;	exon:235766079-235766277,exon:235770160-235770297	LYST	WD40/YVTN repeat-like-containing domain superfamily||BEACH domain superfamily||BEACH domain||WD40-repeat-containing domain superfamily||Lysosomal-trafficking regulator||PH-BEACH domain||WD40 repeat, conserved site||WD40-repeat-containing domain||WD40 repeat||Armadillo-type fold
novel_circ_0017090	1	21247220	21256138	-	8918	333	ENSG00000117298;	exon:21247221-21247363,exon:21255947-21256138	ECE1	Peptidase M13, domain 2||Peptidase M13, C-terminal domain||Endothelin-converting enzyme 1||Peptidase M13||Peptidase M13, N-terminal domain||Metallopeptidase, catalytic domain superfamily
novel_circ_0017095	1	212802700	212807848	+	5148	338	ENSG00000203705;	exon:212802701-212802763,exon:212804320-212804429,exon:212804596-212804651,exon:212807736-212807848	TATDN3	-||Metal-dependent hydrolase||TatD family
novel_circ_0017098	1	212835872	212836187	-	315	314	ENSG00000185523;	exon:212835873-212836187	SPATA45	Spermatogenesis-associated protein 45
novel_circ_0017099	1	212863724	212870168	+	6444	384	ENSG00000162769;	intron:212863725-212863869,intron:212864393-212864519,intron:212870054-212870168	FLVCR1	Major facilitator superfamily||Major facilitator superfamily domain||MFS transporter superfamily
hsa_circ_0015792	1	197642710	197652315	-	9605	306	ENSG00000213047;	exon:197642711-197642821,exon:197645690-197645743,exon:197647055-197647114,exon:197652235-197652315	DENND1B	-||uDENN domain||dDENN domain||cDENN domain||DENN domain-containing protein 1A/1B/1C||Tripartite DENN domain
hsa_circ_0083513	8	21966856	21970310	+	3454	408	ENSG00000130227;	exon:21966857-21967003,exon:21969483-21969576,exon:21970144-21970310	XPO7	Armadillo-like helical||Importin-beta, N-terminal domain||Exportin-7||Armadillo-type fold
novel_circ_0008125	14	68637909	68652668	-	14759	277	ENSG00000182185;	intron:68637910-68638077,intron:68652558-68652668	RAD51B	DNA repair protein RAD51 homologue 2||DNA recombination and repair protein RecA-like, ATP-binding domain||DNA recombination and repair protein Rad51-like, C-terminal||-||P-loop containing nucleoside triphosphate hydrolase||AAA+ ATPase domain||Rad51/DMC1/RadA||DNA recombination and repair protein, RecA-like
novel_circ_0029561	4	56964405	56968515	-	4110	367	ENSG00000084092;	exon:56964406-56964526,exon:56966620-56966736,exon:56968384-56968515	NOA1	P-loop containing nucleoside triphosphate hydrolase||Circularly permuted (CP)-type guanine nucleotide-binding (G) domain||GTP binding domain
novel_circ_0029563	4	56990747	56995409	+	4662	158	ENSG00000047315;	exon:56995251-56995409	POLR2B	RNA polymerase Rpb2, domain 7||RNA polymerase Rpb2, domain 4||RNA polymerase Rpb2, domain 3||RNA polymerase, beta subunit, conserved site||RNA polymerase Rpb2, domain 2 superfamily||RNA polymerase Rpb2, OB-fold||DNA-directed RNA polymerase, subunit 2||DNA-directed RNA polymerase, subunit 2, hybrid-binding domain||RNA polymerase, beta subunit, protrusion||RNA polymerase Rpb2, domain 2||DNA-directe…
novel_circ_0029562	4	56973147	56974022	-	875	205	ENSG00000084092;	exon:56973148-56973353	NOA1	P-loop containing nucleoside triphosphate hydrolase||Circularly permuted (CP)-type guanine nucleotide-binding (G) domain||GTP binding domain
novel_circ_0029565	4	57005245	57007002	+	1757	196	ENSG00000047315;	exon:57005246-57005442	POLR2B	RNA polymerase Rpb2, domain 7||RNA polymerase Rpb2, domain 4||RNA polymerase Rpb2, domain 3||RNA polymerase, beta subunit, conserved site||RNA polymerase Rpb2, domain 2 superfamily||RNA polymerase Rpb2, OB-fold||DNA-directed RNA polymerase, subunit 2||DNA-directed RNA polymerase, subunit 2, hybrid-binding domain||RNA polymerase, beta subunit, protrusion||RNA polymerase Rpb2, domain 2||DNA-directe…
novel_circ_0029566	4	57017042	57020995	+	3953	96	ENSG00000047315;	exon:57020899-57020995	POLR2B	RNA polymerase Rpb2, domain 7||RNA polymerase Rpb2, domain 4||RNA polymerase Rpb2, domain 3||RNA polymerase, beta subunit, conserved site||RNA polymerase Rpb2, domain 2 superfamily||RNA polymerase Rpb2, OB-fold||DNA-directed RNA polymerase, subunit 2||DNA-directed RNA polymerase, subunit 2, hybrid-binding domain||RNA polymerase, beta subunit, protrusion||RNA polymerase Rpb2, domain 2||DNA-directe…
novel_circ_0020289	21	17246861	17280408	-	33547	284	n/a	intergenic_region:17246862-17246954,intergenic_region:17259337-17259446,intergenic_region:17259975-17260058	--	-
novel_circ_0020288	21	17246861	17270359	-	23498	726	n/a	intergenic_region:17246862-17246954,intergenic_region:17248768-17248831,intergenic_region:17257482-17257595,intergenic_region:17259337-17259446,intergenic_region:17259975-17260058,intergenic_region:17264776-17264803,intergenic_region:17266321-17266395,intergenic_region:17270194-17270359	--	-
novel_circ_0012571	17	46119967	46121504	-	1537	261	ENSG00000120071;	intron:46119968-46120049,intron:46121324-46121504	KANSL1	KAT8 regulatory NSL complex subunit 1||-||PEHE domain
novel_circ_0020281	21	17236822	17260058	-	23236	467	n/a	intergenic_region:17236823-17236943,intergenic_region:17246862-17246954,intergenic_region:17248768-17248831,intergenic_region:17259337-17259446,intergenic_region:17259975-17260058	--	-
novel_circ_0020280	21	17236822	17259446	-	22624	321	n/a	intergenic_region:17236823-17236943,intergenic_region:17246862-17246954,intergenic_region:17259337-17259446	--	-
novel_circ_0020284	21	17236822	17270359	-	33537	659	n/a	intergenic_region:17236823-17236943,intergenic_region:17246862-17246954,intergenic_region:17248768-17248831,intergenic_region:17259337-17259446,intergenic_region:17259975-17260058,intergenic_region:17264776-17264803,intergenic_region:17270194-17270359	--	-
hsa_circ_0007411	7	77581426	77600806	+	19380	487	ENSG00000127947;	exon:77581427-77581503,exon:77583555-77583650,exon:77585543-77585581,exon:77592185-77592256,exon:77597842-77597901,exon:77600664-77600806	PTPN12	Protein-tyrosine phosphatase-like||-||Protein-tyrosine phosphatase, catalytic||PTP type protein phosphatase||Tyrosine specific protein phosphatases domain||Protein-tyrosine phosphatase, active site||Protein-tyrosine phosphatase, non-receptor type-12
hsa_circ_0007410	4	73085248	73097272	-	12024	2138	ENSG00000132466;	exon:73097117-73097272	ANKRD17	Ankyrin repeat-containing domain||K Homology domain||Ankyrin repeat-containing domain superfamily||Ankyrin repeat||K Homology domain, type 1 superfamily||K Homology domain, type 1
hsa_circ_0007413	5	9224673	9226967	-	2294	313	ENSG00000112902;	exon:9224674-9224887,exon:9226869-9226967	SEMA5A	PSI domain||Thrombospondin type-1 (TSP1) repeat||Sema domain||Semaphorin||Sema domain superfamily||Thrombospondin type-1 (TSP1) repeat superfamily||WD40/YVTN repeat-like-containing domain superfamily
hsa_circ_0007417	7	66573384	66576932	-	3548	344	ENSG00000229180;	exon:66573385-66573550,exon:66576755-66576932	--	-
hsa_circ_0007416	9	92855810	92856318	-	508	220	ENSG00000127081;	exon:92855811-92855903,exon:92856100-92856318	ZNF484	KRAB domain superfamily||Zinc finger C2H2 superfamily||Zinc finger C2H2-type||Krueppel-associated box
hsa_circ_0007418	1	22489879	22491533	+	1654	900	ENSG00000184677;	exon:22491400-22491533	ZBTB40	Zinc finger C2H2-type||Zinc finger and BTB domain-containing protein 40||SKP1/BTB/POZ domain superfamily||Zinc finger C2H2 superfamily||BTB/POZ domain
hsa_circ_0015243	1	171579353	171587751	+	8398	913	ENSG00000117523;	exon:171579354-171579466,exon:171587648-171587751	PRRC2C	BAT2, N-terminal||Protein PRRC2
hsa_circ_0043423	17	39419716	39423821	-	4105	446	ENSG00000125686;	exon:39419717-39419918,exon:39423697-39423821	MED1	Mediator complex, subunit Med1||-
hsa_circ_0043427	17	39423326	39424738	-	1412	356	ENSG00000125686;	exon:39423327-39423445,exon:39423697-39423821,exon:39424627-39424738	MED1	Mediator complex, subunit Med1||-
hsa_circ_0043428	17	39423326	39427790	-	4464	446	ENSG00000125686;	exon:39423327-39423445,exon:39423697-39423821,exon:39424627-39424738,exon:39427701-39427790	MED1	Mediator complex, subunit Med1||-
novel_circ_0021486	2	112316469	112318068	+	1599	249	ENSG00000188177;	intron:112316470-112316586,intron:112317935-112318068	ZC3H6	Zinc finger, CCCH-type||Zinc finger, CCCH-type superfamily
novel_circ_0021487	2	112316469	112321865	+	5396	245	ENSG00000188177;	exon:112316470-112316586,exon:112317221-112317350	ZC3H6	Zinc finger, CCCH-type||Zinc finger, CCCH-type superfamily
novel_circ_0021484	2	112299848	112318068	+	18220	313	ENSG00000188177;	intron:112299849-112300029,intron:112317935-112318068	ZC3H6	Zinc finger, CCCH-type||Zinc finger, CCCH-type superfamily
novel_circ_0021485	2	112299848	112332282	+	32434	180	ENSG00000188177;	exon:112299849-112300029	ZC3H6	Zinc finger, CCCH-type||Zinc finger, CCCH-type superfamily
novel_circ_0021482	2	112299848	112303351	+	3503	302	ENSG00000188177;	exon:112299849-112300029,exon:112303229-112303351	ZC3H6	Zinc finger, CCCH-type||Zinc finger, CCCH-type superfamily
novel_circ_0021483	2	112299848	112311937	+	12089	313	ENSG00000188177;	exon:112299849-112300029,exon:112311804-112311937	ZC3H6	Zinc finger, CCCH-type||Zinc finger, CCCH-type superfamily
novel_circ_0008805	15	34915037	34927138	-	12101	466	ENSG00000021776;	exon:34915038-34915179,exon:34918258-34918378,exon:34920332-34920434,exon:34927035-34927138	AQR	DNA2/NAM7 helicase, AAA domain||P-loop containing nucleoside triphosphate hydrolase||-||DNA2/NAM7 helicase-like, AAA domain||Intron-binding protein aquarius, N-terminal||CWF11 family
novel_circ_0008804	15	34900621	34932434	-	31813	357	ENSG00000021776;	exon:34900622-34900863,exon:34932318-34932434	AQR	DNA2/NAM7 helicase, AAA domain||P-loop containing nucleoside triphosphate hydrolase||-||DNA2/NAM7 helicase-like, AAA domain||Intron-binding protein aquarius, N-terminal||CWF11 family
novel_circ_0008809	15	34927034	34932434	-	5400	332	ENSG00000021776;	exon:34927035-34927138,exon:34930258-34930371,exon:34932318-34932434	AQR	DNA2/NAM7 helicase, AAA domain||P-loop containing nucleoside triphosphate hydrolase||-||DNA2/NAM7 helicase-like, AAA domain||Intron-binding protein aquarius, N-terminal||CWF11 family
novel_circ_0008808	15	34918257	34938813	-	20556	140	ENSG00000021776;	exon:34934571-34934635,exon:34938737-34938813	AQR	DNA2/NAM7 helicase, AAA domain||P-loop containing nucleoside triphosphate hydrolase||-||DNA2/NAM7 helicase-like, AAA domain||Intron-binding protein aquarius, N-terminal||CWF11 family
novel_circ_0021489	2	112485916	112494375	+	8459	310	ENSG00000114999;	exon:112485917-112485995,exon:112494143-112494375	TTL	Tubulin-tyrosine ligase/Tubulin polyglutamylase
hsa_circ_0077492	6	100766564	100767345	-	781	342	ENSG00000112249;	exon:100766565-100766705,exon:100767145-100767345	ASCC3	DEAD/DEAH box helicase domain||C2 domain superfamily||Winged helix DNA-binding domain superfamily||Helicase superfamily 1/2, ATP-binding domain||Sec63 domain||Helicase, C-terminal||-||AAA+ ATPase domain||P-loop containing nucleoside triphosphate hydrolase||Immunoglobulin E-set
hsa_circ_0077493	6	100766564	100848707	-	82143	1496	ENSG00000112249;	exon:100766565-100766705	ASCC3	DEAD/DEAH box helicase domain||C2 domain superfamily||Winged helix DNA-binding domain superfamily||Helicase superfamily 1/2, ATP-binding domain||Sec63 domain||Helicase, C-terminal||-||AAA+ ATPase domain||P-loop containing nucleoside triphosphate hydrolase||Immunoglobulin E-set
hsa_circ_0077496	6	100798712	100848707	-	49995	1154	ENSG00000112249;	exon:100798713-100798838,exon:100799431-100799572	ASCC3	DEAD/DEAH box helicase domain||C2 domain superfamily||Winged helix DNA-binding domain superfamily||Helicase superfamily 1/2, ATP-binding domain||Sec63 domain||Helicase, C-terminal||-||AAA+ ATPase domain||P-loop containing nucleoside triphosphate hydrolase||Immunoglobulin E-set
hsa_circ_0077495	6	100798712	100805880	-	7168	594	ENSG00000112249;	exon:100798713-100798838,exon:100799431-100799572,exon:100800300-100800504,exon:100805760-100805880	ASCC3	DEAD/DEAH box helicase domain||C2 domain superfamily||Winged helix DNA-binding domain superfamily||Helicase superfamily 1/2, ATP-binding domain||Sec63 domain||Helicase, C-terminal||-||AAA+ ATPase domain||P-loop containing nucleoside triphosphate hydrolase||Immunoglobulin E-set
novel_circ_0016059	1	154225083	154237136	+	12053	363	ENSG00000143569;	exon:154225084-154225213,exon:154227282-154227359,exon:154236566-154236611,exon:154237024-154237136	UBAP2L	UBA-like superfamily||-||Ubiquitin-associated domain||UBAP2/protein lingerer
novel_circ_0005745	12	69784719	69800337	+	15618	95	ENSG00000127328;	exon:69784720-69784815	RAB3IP	-||GDP/GTP exchange factor Sec2, N-terminal||Guanine nucleotide exchange factor RAB3IL/RAB3IP/Sec2
novel_circ_0011003	16	46677314	46679156	-	1842	296	ENSG00000069329;	exon:46677315-46677398,exon:46678943-46679156	VPS35	Vacuolar protein sorting-associated protein 35||-||Armadillo-type fold
novel_circ_0011002	16	46676582	46679156	-	2574	213	ENSG00000069329;	exon:46678943-46679156	VPS35	Vacuolar protein sorting-associated protein 35||-||Armadillo-type fold
novel_circ_0016054	1	154170399	154176248	-	5849	133	ENSG00000143549;	exon:154176115-154176248	TPM3	Tropomyosin||-
hsa_circ_0003919	5	65680493	65685472	-	4979	307	ENSG00000197860;	exon:65680494-65680556,exon:65680656-65680794,exon:65685368-65685472	SGTB	Tetratricopeptide repeat 1||Tetratricopeptide-like helical domain superfamily||Tetratricopeptide repeat||SGTA, homodimerisation domain||Tetratricopeptide repeat-containing domain
novel_circ_0004008	12	104311289	104315896	+	4607	119	ENSG00000198431;	exon:104315777-104315896	TXNRD1	Pyridine nucleotide-disulphide oxidoreductase, class I||-||Pyridine nucleotide-disulphide oxidoreductase, class I, active site||Glutaredoxin||FAD/NAD-linked reductase, dimerisation domain superfamily||FAD-dependent oxidoreductase 2, FAD binding domain||FAD/NAD(P)-binding domain||FAD/NAD(P)-binding domain superfamily||Thioredoxin-like superfamily||Thioredoxin/glutathione reductase selenoprotein||P…
novel_circ_0018525	1	51459040	51463798	-	4758	291	ENSG00000085832;	exon:51459041-51459148,exon:51461091-51461150,exon:51463673-51463798	EPS15	EF-hand domain pair||Ubiquitin interacting motif||EH domain||EF-Hand 1, calcium-binding site||-||EF-hand domain
hsa_circ_0003915	2	199368604	199433514	-	64910	531	ENSG00000119042;	exon:199368605-199368707,exon:199380364-199380487,exon:199381694-199381820,exon:199433338-199433514	SATB2	SATB, CUTL domain superfamily||-||Lambda repressor-like, DNA-binding domain superfamily||Homeobox domain||SATB, ubiquitin-like oligomerisation domain||CUT domain||DNA-binding protein SATB1/SATB2||SATB, CUT1-like DNA-binding domain||SATB, ULD domain superfamily||Homeobox-like domain superfamily
hsa_circ_0003916	15	68141945	68153695	+	11750	465	ENSG00000033800;	exon:68141946-68142030,exon:68142290-68142337,exon:68145816-68145906,exon:68146566-68146700,exon:68153590-68153695	PIAS1	SAP domain superfamily||Zinc finger, RING/FYVE/PHD-type||PINIT domain superfamily||Zinc finger, MIZ-type||SAP domain||-||PINIT domain
novel_circ_0018526	1	51459040	51465326	-	6286	356	ENSG00000085832;	exon:51459041-51459148,exon:51461091-51461150,exon:51463673-51463798,exon:51465261-51465326	EPS15	EF-hand domain pair||Ubiquitin interacting motif||EH domain||EF-Hand 1, calcium-binding site||-||EF-hand domain
hsa_circ_0003910	3	3777724	3789074	-	11350	11350	ENSG00000144455;	exon:3777725-3777803,exon:3779241-3779322,exon:3782503-3782701,exon:3788914-3789074	SUMF1	C-type lectin fold||Sulfatase-modifying factor enzyme||Sulfatase-modifying factor enzyme superfamily||-
hsa_circ_0003911	16	58574608	58583182	-	8574	1173	ENSG00000125107;	exon:58582793-58582903,exon:58583056-58583182	CNOT1	-||CCR4-Not complex component, Not1, C-terminal||CCR4-NOT transcription complex subunit 1, HEAT repeat||CCR4-NOT transcription complex subunit 1, TTP binding domain||CCR4-NOT transcription complex subunit 1||CCR4-NOT subunit 1, TTP binding domain superfamily||CCR4-NOT transcription complex subunit 1, CAF1-binding domain||CCR4-Not complex, Not1 subunit, domain of unknown function DUF3819||MIF4G-li…
hsa_circ_0003912	19	48633443	48633655	-	212	212	ENSG00000105516;	exon:48633444-48633655	DBP	Basic-leucine zipper domain||PAR basic leucine zipper protein||D site-binding protein
novel_circ_0004000	12	104003134	104021491	-	18357	443	ENSG00000120820;	exon:104003135-104003306,exon:104015013-104015105,exon:104019630-104019676,exon:104021357-104021491	GLT8D2	Glycosyl transferase, family 8||-||Nucleotide-diphospho-sugar transferases
novel_circ_0013713	18	23946143	23953109	+	6966	249	ENSG00000053747;	exon:23950029-23950159,exon:23952990-23953109	LAMA3	Concanavalin A-like lectin/glucanase domain superfamily||Laminin, N-terminal domain superfamily||EGF-like domain||Laminin G domain||Laminin, N-terminal||EGF-like, conserved site||-||Laminin IV||Laminin domain II||Laminin alpha, domain I||Laminin EGF domain
novel_circ_0013711	18	23898737	23905624	+	6887	102	ENSG00000053747;	exon:23905522-23905624	LAMA3	Concanavalin A-like lectin/glucanase domain superfamily||Laminin, N-terminal domain superfamily||EGF-like domain||Laminin G domain||Laminin, N-terminal||EGF-like, conserved site||-||Laminin IV||Laminin domain II||Laminin alpha, domain I||Laminin EGF domain
novel_circ_0013716	18	24064139	24080773	+	16634	364	ENSG00000168234;	exon:24064140-24064188,exon:24066012-24066140,exon:24080585-24080773	TTC39C	Inclusion body clearance protein Iml2/Tetratricopeptide repeat protein 39||Tetratricopeptide-like helical domain superfamily||-
novel_circ_0000577	10	132337564	132344650	+	7086	340	ENSG00000148814;	exon:132337565-132337695,exon:132342213-132342271,exon:132344498-132344650	LRRC27	Leucine-rich repeat domain superfamily||Leucine-rich repeat||Leucine-rich repeat, typical subtype
hsa_circ_0008038	9	83659779	83669327	-	9548	2672	n/a	intergenic_region:83659780-83659840,intergenic_region:83666350-83666433,intergenic_region:83669185-83669327	--	-
hsa_circ_0008039	7	677228	711527	-	34299	462	ENSG00000188191;	exon:677229-677320,exon:680556-680726,exon:711329-711527	PRKAR1B	RmlC-like jelly roll fold||cAMP-dependent protein kinase regulatory subunit||Cyclic nucleotide-binding, conserved site||cAMP-dependent protein kinase regulatory subunit, dimerization-anchoring domain||Cyclic nucleotide-binding domain||Cyclic nucleotide-binding-like
hsa_circ_0008036	2	135129994	135135932	+	5938	950	ENSG00000115839;	exon:135129995-135130087,exon:135130552-135130721	RAB3GAP1	Rab3 GTPase-activating protein catalytic subunit
hsa_circ_0008037	19	34431860	34434968	+	3108	237	ENSG00000126261;	exon:34431861-34431931,exon:34434868-34434968	UBA2	Ubiquitin/SUMO-activating enzyme ubiquitin-like domain||SUMO-activating enzyme subunit Uba2||-||Ubiquitin activating enzyme, alpha domain superfamily||Ubiquitin-activating enzyme, catalytic cysteine domain||Ubiquitin-activating enzyme E1, Cys active site||THIF-type NAD/FAD binding fold||Ubiquitin-activating enzyme E1, conserved site||Ubiquitin-activating enzyme||SUMO-activating enzyme subunit 2, …
hsa_circ_0008034	15	50458999	50465191	+	6192	351	ENSG00000138592;	exon:50459000-50459162	USP8	USP8 dimerisation domain||Ubiquitin specific protease domain||Ubiquitin specific protease, conserved site||Rhodanese-like domain||-||Papain-like cysteine peptidase superfamily||Peptidase C19, ubiquitin carboxyl-terminal hydrolase||Rhodanese-like domain superfamily
hsa_circ_0008035	8	117818434	117837201	-	18767	670	ENSG00000182197;	exon:117818435-117818530,exon:117837108-117837201	EXT1	Exostosin, GT47 domain||Nucleotide-diphospho-sugar transferases||Exostosin-1||-||Exostosin-like||Glycosyl transferase 64 domain
hsa_circ_0008032	2	171925536	171953001	+	27473	302	ENSG00000128708;	exon:171925537-171925641,exon:171946708-171946783,exon:171952881-171953001	HAT1	Histone acetyltransferase HAT1, C-terminal||-||Histone acetyl transferase HAT1 N-terminal||Histone acetyl transferase 1, N-terminal domain superfamily||Acyl-CoA N-acyltransferase||Histone acetyltransferase type B, catalytic subunit
hsa_circ_0008033	19	34396300	34396657	+	357	207	ENSG00000105220;	exon:34396301-34396430,exon:34396581-34396657	GPI	-||Phosphoglucose isomerase, C-terminal||Phosphoglucose isomerase, conserved site||Phosphoglucose isomerase, SIS domain 1||Phosphoglucose isomerase (PGI)||Phosphoglucose isomerase, SIS domain 2
hsa_circ_0008030	19	34194477	34215661	+	21184	660	ENSG00000257103;	exon:34215596-34215661	LSM14A	FFD box||LSM domain superfamily||FDF domain||Lsm14-like, N-terminal||-||TFG box||DFDF domain
hsa_circ_0008031	16	53267293	53268126	+	833	397	ENSG00000177200;	exon:53267294-53267490,exon:53267927-53268126	CHD9	BRK domain||Chromo-like domain superfamily||SNF2-like, N-terminal domain superfamily||Helicase superfamily 1/2, ATP-binding domain||Helicase, C-terminal||Chromo domain||-||Chromo/chromo shadow domain||P-loop containing nucleoside triphosphate hydrolase||SNF2-related, N-terminal domain||BRK domain superfamily
novel_circ_0015658	1	112540778	112550693	-	9915	320	ENSG00000007341;	exon:112540779-112540868,exon:112541951-112542090,exon:112550601-112550693	ST7L	-||ST7||Tetratricopeptide-like helical domain superfamily
novel_circ_0015650	1	111691333	111709264	+	17931	115	ENSG00000116473;	exon:111709149-111709264	RAP1A	Small GTP-binding protein domain||Small GTPase superfamily, Ras-type||Ras-related protein Rap1||P-loop containing nucleoside triphosphate hydrolase||Small GTPase
novel_circ_0015653	1	111703335	111704486	+	1151	283	ENSG00000116473;	exon:111703336-111703476,exon:111704343-111704486	RAP1A	Small GTP-binding protein domain||Small GTPase superfamily, Ras-type||Ras-related protein Rap1||P-loop containing nucleoside triphosphate hydrolase||Small GTPase
novel_circ_0015654	1	111703335	111706777	+	3442	397	ENSG00000116473;	exon:111703336-111703476,exon:111704343-111704486,exon:111706663-111706777	RAP1A	Small GTP-binding protein domain||Small GTPase superfamily, Ras-type||Ras-related protein Rap1||P-loop containing nucleoside triphosphate hydrolase||Small GTPase
novel_circ_0015655	1	11199257	11199703	-	446	145	ENSG00000198793;	exon:11199258-11199403	MTOR	Serine/threonine-protein kinase TOR||Phosphatidylinositol 3-/4-kinase, catalytic domain superfamily||FKBP12-rapamycin binding domain superfamily||Phosphatidylinositol 3-/4-kinase, catalytic domain||FKBP12-rapamycin binding domain||Phosphatidylinositol 3/4-kinase, conserved site||Armadillo-type fold||FATC domain||Tetratricopeptide-like helical domain superfamily||Domain of unknown function DUF3385…
novel_circ_0015656	1	11247624	11248094	-	470	108	ENSG00000198793;	exon:11247625-11247733	MTOR	Serine/threonine-protein kinase TOR||Phosphatidylinositol 3-/4-kinase, catalytic domain superfamily||FKBP12-rapamycin binding domain superfamily||Phosphatidylinositol 3-/4-kinase, catalytic domain||FKBP12-rapamycin binding domain||Phosphatidylinositol 3/4-kinase, conserved site||Armadillo-type fold||FATC domain||Tetratricopeptide-like helical domain superfamily||Domain of unknown function DUF3385…
hsa_circ_0040191	16	70258979	70268379	-	9400	1030	ENSG00000090861;	exon:70258980-70259186,exon:70267659-70267809,exon:70268271-70268379	AARS	Alanyl-tRNA synthetase, class IIc, N-terminal||Threonyl/alanyl tRNA synthetase, SAD||Alanine-tRNA ligase, eukaryota/bacteria||Translation protein, beta-barrel domain superfamily||Alanine-tRNA ligase, class IIc||Threonyl/alanyl tRNA synthetase, class II-like, putative editing domain superfamily||Alanine-tRNA ligase, class IIc, anti-codon-binding domain superfamily||Alanyl-tRNA synthetase, class II…
hsa_circ_0032248	14	65629491	65669480	+	39989	353	ENSG00000033170;	exon:65629492-65629606,exon:65669243-65669480	FUT8	SH3-like domain superfamily||Glycosyltransferase family 23 (GT23) domain||Alpha-(1,6)-fucosyltransferase, SH3 domain||SH3 domain||Alpha-(1,6)-fucosyltransferase||-
hsa_circ_0032249	14	65721774	65733381	+	11607	575	ENSG00000033170;	exon:65733231-65733381	FUT8	SH3-like domain superfamily||Glycosyltransferase family 23 (GT23) domain||Alpha-(1,6)-fucosyltransferase, SH3 domain||SH3 domain||Alpha-(1,6)-fucosyltransferase||-
novel_circ_0008116	14	67722668	67728219	-	5551	109	ENSG00000139988;	intron:67722669-67722778	RDH12	Short-chain dehydrogenase/reductase SDR||NAD(P)-binding domain superfamily
novel_circ_0008777	15	33008013	33018931	-	10918	61	ENSG00000248905;	intron:33008014-33008075	FMN1	Formin, FH2 domain||Formin homology family, Cappuccino subfamily||-
novel_circ_0014221	18	6778945	6837414	+	58469	509	ENSG00000088756;	exon:6778946-6779036,exon:6824762-6824964,exon:6837197-6837414	ARHGAP28	Rho GTPase activation protein||-||Rho GTPase-activating protein domain
novel_circ_0017876	1	2562864	2563416	+	552	551	ENSG00000157873;	exon:2562865-2563416	TNFRSF14	-||TNFR/NGFR cysteine-rich region||Tumor necrosis factor receptor 14/UL144, N-terminal||Tumour necrosis factor receptor 14
novel_circ_0017875	1	25553921	25557267	+	3346	368	ENSG00000157978;	exon:25553922-25554064,exon:25554860-25554972,exon:25557153-25557267	LDLRAP1	PTB/PI domain||PH-like domain superfamily
novel_circ_0009444	15	59672636	59680308	-	7672	67	ENSG00000140299;	exon:59680241-59680308	BNIP2	CRAL-TRIO lipid binding domain superfamily||Bcl2-/adenovirus E1B 19kDa-interacting protein 2||CRAL-TRIO lipid binding domain||-
novel_circ_0009446	15	59677910	59682514	-	4604	173	ENSG00000140299;	exon:59680241-59680308,exon:59682408-59682514	BNIP2	CRAL-TRIO lipid binding domain superfamily||Bcl2-/adenovirus E1B 19kDa-interacting protein 2||CRAL-TRIO lipid binding domain||-
novel_circ_0009442	15	59671182	59680308	-	9126	476	ENSG00000140299;	exon:59671183-59671314,exon:59672637-59672739,exon:59679592-59679768,exon:59680241-59680308	BNIP2	CRAL-TRIO lipid binding domain superfamily||Bcl2-/adenovirus E1B 19kDa-interacting protein 2||CRAL-TRIO lipid binding domain||-
novel_circ_0009443	15	59671182	59682514	-	11332	406	ENSG00000140299;	exon:59671183-59671314,exon:59672637-59672739,exon:59680241-59680308,exon:59682408-59682514	BNIP2	CRAL-TRIO lipid binding domain superfamily||Bcl2-/adenovirus E1B 19kDa-interacting protein 2||CRAL-TRIO lipid binding domain||-
novel_circ_0010073	15	82400632	82414804	+	14172	286	ENSG00000259429;	intron:82400633-82400716,intron:82414601-82414804	--	-
hsa_circ_0045454	17	67909581	67918838	+	9257	2616	ENSG00000171634;	exon:67909582-67909761	BPTF	Bromodomain, conserved site||Zinc finger, PHD-type||Bromodomain||Zinc finger, PHD-type, conserved site||Zinc finger, PHD-finger||Zinc finger, RING/FYVE/PHD-type||Bromodomain-like superfamily||WHIM2 domain||WHIM1 domain||Nucleosome-remodeling factor subunit BPTF||-||Zinc finger, FYVE/PHD-type||DDT domain
hsa_circ_0040440	16	74300114	74302292	+	2178	364	ENSG00000103035;	exon:74302212-74302292	PSMD7	JAB1/MPN/MOV34 metalloenzyme domain||-||Rpn11/EIF3F, C-terminal||MPN domain||26S Proteasome non-ATPase regulatory subunit 7/8
hsa_circ_0001512	5	94888878	94912976	-	24098	583	ENSG00000175471;	exon:94909251-94909381,exon:94912806-94912976	MCTP1	Phosphoribosyltransferase C-terminal||C2 domain||C2 domain superfamily
hsa_circ_0001513	5	96979137	96986670	+	7533	1112	ENSG00000113441;	exon:96985080-96985218,exon:96986539-96986670	LNPEP	Peptidase M1, membrane alanine aminopeptidase||Cystinyl aminopeptidase||Aminopeptidase N-like , N-terminal||Aminopeptidase N-type||ERAP1-like C-terminal domain||Peptidase M1, alanine aminopeptidase/leukotriene A4 hydrolase
novel_circ_0010062	15	82380397	82382879	+	2482	437	ENSG00000259429;	intron:82380398-82380503,intron:82382208-82382298,intron:82382637-82382879	--	-
novel_circ_0006305	13	20807456	20855765	-	48309	460	ENSG00000132953;	exon:20807457-20807634,exon:20808436-20808581,exon:20855627-20855765	XPO4	Armadillo-like helical||Exportin-1, C-terminal||Armadillo-type fold
hsa_circ_0001516	5	97101758	97103094	+	1336	1336	ENSG00000251513;	exon:97101759-97102132,exon:97103026-97103094	--	-
hsa_circ_0001518	5	108348398	108367953	-	19555	513	ENSG00000145743;	exon:108348399-108348530,exon:108364738-108364995,exon:108367831-108367953	FBXL17	F-box-like domain superfamily||Leucine-rich repeat domain superfamily||F-box domain||Leucine-rich repeat||Leucine-rich repeat, cysteine-containing subtype
hsa_circ_0001519	5	109713519	109729513	+	15994	572	ENSG00000112893;	exon:109713520-109713774,exon:109716120-109716264,exon:109729342-109729513	MAN2A1	Glycoside hydrolase families 57/38, central domain superfamily||Glycosyl hydrolase, all-beta||Glycoside hydrolase family 38, central domain superfamily||Galactose mutarotase-like domain superfamily||Glycosyl hydrolase family 38, C-terminal||Glycoside hydrolase 38, N-terminal domain superfamily||Glycoside hydrolase family 38, central domain||Glycoside hydrolase/deacetylase, beta/alpha-barrel||Glyc…
novel_circ_0005758	12	70507894	70522630	+	14736	261	ENSG00000258168;	exon:70513185-70513227,exon:70520154-70520267,exon:70522524-70522630	--	-
novel_circ_0005755	12	70294070	70294883	+	813	295	ENSG00000111596;	intron:70294071-70294294,intron:70294811-70294883	AC092881.1	Not2/Not3/Not5||-||NOT2/NOT3/NOT5, C-terminal||CCR4-NOT complex subunit 2/3/5, N-terminal domain superfamily
novel_circ_0005751	12	70219392	70225390	-	5998	246	ENSG00000257815;	intron:70224965-70225032,intron:70225211-70225390	--	-
hsa_circ_0028281	12	111672660	111683307	-	10647	665	ENSG00000089234;	exon:111672661-111672774	BRAP	Zinc finger, UBP-type||BRAP2, RNA recognition motif||Zinc finger, RING-type||BRCA1-associated 2||RNA-binding domain superfamily||Zinc finger, RING/FYVE/PHD-type
novel_circ_0011086	16	4996347	4997044	+	697	301	ENSG00000103184;	exon:4996348-4996460,exon:4996855-4997044	SEC14L5	PRELI/MSF1 domain||GOLD domain||CRAL-TRIO lipid binding domain||GOLD domain superfamily||CRAL/TRIO, N-terminal domain superfamily||CRAL-TRIO lipid binding domain superfamily||CRAL/TRIO, N-terminal domain
novel_circ_0009996	15	78030006	78034739	-	4733	306	ENSG00000167202;	intron:78030007-78030170,intron:78034475-78034569,intron:78034690-78034739	TBC1D2B	PH-like domain superfamily||Rab-GTPase-TBC domain||Rab-GTPase-TBC domain superfamily||-||Pleckstrin homology domain
novel_circ_0009997	15	78030006	78045068	-	15062	331	ENSG00000167202;	exon:78030007-78030170,exon:78044900-78045068	TBC1D2B	PH-like domain superfamily||Rab-GTPase-TBC domain||Rab-GTPase-TBC domain superfamily||-||Pleckstrin homology domain
novel_circ_0009994	15	78012822	78017957	-	5135	110	ENSG00000167202;	exon:78017847-78017957	TBC1D2B	PH-like domain superfamily||Rab-GTPase-TBC domain||Rab-GTPase-TBC domain superfamily||-||Pleckstrin homology domain
novel_circ_0032326	6	111329531	111333367	-	3836	450	ENSG00000009413;	exon:111329532-111329738,exon:111333123-111333367	REV3L	Ribonuclease H-like superfamily||-||Domain of unknown function DUF1725||Ribonuclease H superfamily||DNA-directed DNA polymerase, family B, exonuclease domain||DNA polymerase family B, C-terminal domain||DNA-directed DNA polymerase, family B, multifunctional domain||DNA-directed DNA polymerase, family B||DNA-directed DNA polymerase, family B, conserved site||Domain of unknown function DUF4683||DNA…
novel_circ_0032322	6	111311068	111322678	-	11610	550	ENSG00000009413;	exon:111311069-111311259,exon:111313352-111313489,exon:111315267-111315381,exon:111322569-111322678	REV3L	Ribonuclease H-like superfamily||-||Domain of unknown function DUF1725||Ribonuclease H superfamily||DNA-directed DNA polymerase, family B, exonuclease domain||DNA polymerase family B, C-terminal domain||DNA-directed DNA polymerase, family B, multifunctional domain||DNA-directed DNA polymerase, family B||DNA-directed DNA polymerase, family B, conserved site||Domain of unknown function DUF4683||DNA…
hsa_circ_0009075	12	110025741	110029635	+	3894	433	ENSG00000076513;	exon:110025742-110025823,exon:110027705-110027766,exon:110028512-110028642,exon:110029478-110029635	ANKRD13A	-||Ankyrin repeat domain-containing protein 13||Ankyrin repeat||Ubiquitin interacting motif||Ankyrin repeat-containing domain superfamily||Ankyrin repeat-containing domain
hsa_circ_0009074	6	149512154	149517450	-	5296	245	ENSG00000131013;	exon:149512155-149512302,exon:149517354-149517450	PPIL4	Cyclophilin-type peptidyl-prolyl cis-trans isomerase domain||Nucleotide-binding alpha-beta plait domain superfamily||Cyclophilin-like domain superfamily||RNA recognition motif domain||PPIL4-like, cyclophilin domain||Cyclophilin-RNA interacting protein||-||RNA-binding domain superfamily
hsa_circ_0009076	1	51827795	51834170	-	6375	228	ENSG00000078618;	exon:51827796-51827869,exon:51830164-51830269,exon:51834017-51834170	NRDC	Peptidase M16, N-terminal||Peptidase M16, zinc-binding site||Peptidase M16, C-terminal||Metalloenzyme, LuxS/M16 peptidase-like||Peptidase M16, middle/third domain
hsa_circ_0009070	1	53800692	53832591	-	31899	1044	ENSG00000058804;	exon:53800693-53800848,exon:53832490-53832591	NDC1	Nucleoporin protein Ndc1-Nup
novel_circ_0014521	19	12878381	12878834	-	453	361	ENSG00000105612;	exon:12878382-12878579,exon:12878670-12878834	DNASE2	Deoxyribonuclease II
novel_circ_0014520	19	12813082	12813565	+	483	360	ENSG00000284491;ENSG00000104889;	exon:12813083-12813206,exon:12813328-12813565	THSD8;RNASEH2A	-
hsa_circ_0009079	22	41125863	41130003	+	4140	553	ENSG00000100393;	exon:41125864-41126040,exon:41127487-41127748,exon:41129890-41130003	EP300	Coactivator CBP, KIX domain superfamily||CBP/p300, atypical RING domain superfamily||Bromodomain||Nuclear receptor coactivator, CREB-bp-like, interlocking||Nuclear receptor coactivator, interlocking||CBP/p300-type histone acetyltransferase domain||Bromodomain-like superfamily||Nuclear receptor coactivator, CREB-bp-like, interlocking domain superfamily||TAZ domain superfamily||Coactivator CBP, KIX…
hsa_circ_0028133	12	109481636	109501534	+	19898	1409	ENSG00000151148;	exon:109481637-109481742,exon:109501371-109501534	UBE3B	-||HECT domain||IQ motif, EF-hand binding site||HECT, E3 ligase catalytic domain
hsa_circ_0028135	12	109488571	109507735	+	19164	1175	ENSG00000151148;	exon:109488572-109488668,exon:109489919-109490004	UBE3B	-||HECT domain||IQ motif, EF-hand binding site||HECT, E3 ligase catalytic domain
hsa_circ_0039076	16	30704063	30704315	+	252	252	ENSG00000080603;	exon:30704064-30704315	SRCAP	SNF2-related, N-terminal domain||P-loop containing nucleoside triphosphate hydrolase||AT hook, DNA-binding motif||Helicase/SANT-associated domain||-||Helicase superfamily 1/2, ATP-binding domain||SNF2-like, N-terminal domain superfamily||Helicase, C-terminal
hsa_circ_0034088	15	22872824	22873729	+	905	387	ENSG00000273749;	exon:22872825-22872972,exon:22873491-22873729	CYFIP1	-||Cytoplasmic FMR1-interacting||Protein of unknown function DUF1394
hsa_circ_0021469	11	18558227	18566482	-	8255	358	ENSG00000151116;	exon:18558228-18558330,exon:18564892-18565010,exon:18566347-18566482	UEVLD	-||NAD(P)-binding domain superfamily||Lactate/malate dehydrogenase, N-terminal||Lactate/malate dehydrogenase, C-terminal||Lactate dehydrogenase/glycoside hydrolase, family 4, C-terminal||Ubiquitin E2 variant, N-terminal||Ubiquitin-conjugating enzyme/RWD-like||L-lactate/malate dehydrogenase
hsa_circ_0035976	15	66481754	66485191	+	3437	327	ENSG00000169032;	exon:66481755-66481879,exon:66484990-66485191	MAP2K1	Protein kinase, ATP binding site||Serine/threonine-protein kinase, active site||Protein kinase domain||Protein kinase-like domain superfamily
novel_circ_0012680	17	49805362	49815913	+	10551	290	ENSG00000136504;	exon:49805363-49805445,exon:49811476-49811574,exon:49815803-49815913	KAT7	Zinc finger, C2H2C-type superfamily||MYST, zinc finger domain||Zinc finger, C2H2C-type||Histone acetyltransferase domain, MYST-type||-||Acyl-CoA N-acyltransferase||Winged helix-like DNA-binding domain superfamily
hsa_circ_0053441	2	32377587	32395593	+	18006	709	ENSG00000115760;	exon:32377588-32377769,exon:32380153-32380290,exon:32388750-32388943,exon:32392039-32392150,exon:32395511-32395593	BIRC6	BIR repeat||-||Ubiquitin-conjugating enzyme E2||Baculoviral IAP repeat-containing protein 6||Ubiquitin-conjugating enzyme/RWD-like
hsa_circ_0033530	14	104022156	104026939	+	4783	850	ENSG00000156414;	exon:104022157-104022330,exon:104024569-104024680,exon:104026679-104026939	TDRD9	Helicase superfamily 1/2, ATP-binding domain||P-loop containing nucleoside triphosphate hydrolase||Helicase, C-terminal||DEAD/DEAH box helicase domain||Tudor domain||SNase-like, OB-fold superfamily||Helicase-associated domain
hsa_circ_0069635	4	47560948	47563765	+	2817	312	ENSG00000145246;	exon:47560949-47561075,exon:47563581-47563765	ATP10D	P-type ATPase, cytoplasmic domain N||Probable phospholipid-transporting ATPase VD||P-type ATPase, phosphorylation site||HAD-like superfamily||P-type ATPase||P-type ATPase, C-terminal||P-type ATPase, transmembrane domain superfamily||P-type ATPase, subfamily IV||HAD superfamily||P-type ATPase, N-terminal||P-type ATPase, A domain superfamily||-
novel_circ_0006830	13	52434792	52439168	-	4376	273	ENSG00000136100;	exon:52434793-52434882,exon:52436290-52436404,exon:52439098-52439168	VPS36	Winged helix DNA-binding domain superfamily||Snf8/Vps36 family||Winged helix-like DNA-binding domain superfamily||PH-like domain superfamily||-||Vacuolar protein sorting protein 36, GLUE domain||Vacuolar protein sorting protein 36
hsa_circ_0072202	5	37114959	37120340	-	5381	215	ENSG00000197603;	exon:37114960-37115049,exon:37120216-37120340	CPLANE1	Ciliogenesis and planar polarity effector 1||-||WD40-repeat-containing domain superfamily
novel_circ_0003347	11	68438445	68438682	+	237	236	ENSG00000162337;	exon:68438446-68438682	LRP5	Low-density lipoprotein (LDL) receptor class A, conserved site||Six-bladed beta-propeller, TolB-like||Low-density lipoprotein (LDL) receptor class A repeat||LDLR class B repeat||EGF-like domain||LDL receptor-like superfamily||-||Low density lipoprotein receptor-related protein 5/6
novel_circ_0003346	11	68436888	68438682	+	1794	346	ENSG00000162337;	exon:68436889-68436999,exon:68438446-68438682	LRP5	Low-density lipoprotein (LDL) receptor class A, conserved site||Six-bladed beta-propeller, TolB-like||Low-density lipoprotein (LDL) receptor class A repeat||LDLR class B repeat||EGF-like domain||LDL receptor-like superfamily||-||Low density lipoprotein receptor-related protein 5/6
novel_circ_0003343	11	68386315	68390052	+	3737	171	ENSG00000162337;	exon:68389881-68390052	LRP5	Low-density lipoprotein (LDL) receptor class A, conserved site||Six-bladed beta-propeller, TolB-like||Low-density lipoprotein (LDL) receptor class A repeat||LDLR class B repeat||EGF-like domain||LDL receptor-like superfamily||-||Low density lipoprotein receptor-related protein 5/6
novel_circ_0011823	17	16126081	16146548	-	20467	389	ENSG00000141027;	exon:16126082-16126209,exon:16143606-16143696,exon:16146376-16146548	NCOR1	Homeobox-like domain superfamily||SANT domain||SANT/Myb domain||N-CoR, GPS2-interacting domain||-
novel_circ_0011821	17	16101249	16101757	-	508	507	ENSG00000141027;	exon:16101250-16101757	NCOR1	Homeobox-like domain superfamily||SANT domain||SANT/Myb domain||N-CoR, GPS2-interacting domain||-
novel_circ_0011827	17	16137310	16153395	-	16085	329	ENSG00000141027;	exon:16137311-16137412,exon:16138158-16138212,exon:16149451-16149517,exon:16151946-16151998,exon:16153339-16153395	NCOR1	Homeobox-like domain superfamily||SANT domain||SANT/Myb domain||N-CoR, GPS2-interacting domain||-
novel_circ_0003348	11	68505144	68522689	+	17545	126	ENSG00000110075;	exon:68505145-68505271	PPP6R3	Peptide N glycanase, PAW domain||-||Armadillo-type fold||SIT4 phosphatase-associated protein family
hsa_circ_0008859	14	71012999	71036157	+	23158	1074	ENSG00000100731;	exon:71033931-71034036,exon:71036065-71036157	PCNX1	Pecanex, C-terminal||Protein Pecanex
hsa_circ_0008856	10	80507227	80509471	+	2244	318	ENSG00000108219;	exon:80507228-80507374	TSPAN14	Tetraspanin||Tetraspanin, conserved site||Tetraspanin/Peripherin||Tetraspanin, EC2 domain superfamily
hsa_circ_0008857	1	161846448	161863312	+	16864	532	ENSG00000118217;	exon:161846449-161846580,exon:161851722-161851835,exon:161853224-161853323,exon:161860207-161860277,exon:161863198-161863312	ATF6	Basic-leucine zipper domain||cAMP-dependent transcription factor ATF-6 alpha
hsa_circ_0008851	10	35137781	35152380	+	14599	4111	ENSG00000095794;	exon:35137782-35137879,exon:35148368-35148491,exon:35152280-35152380	CREM	Basic-leucine zipper domain||Coactivator CBP, pKID||-||cAMP response element binding (CREB) protein
novel_circ_0001859	10	91951402	91956657	+	5255	129	ENSG00000095564;	exon:91956528-91956657	BTAF1	SNF2-related, N-terminal domain||P-loop containing nucleoside triphosphate hydrolase||Armadillo-type fold||Domain of unknown function DUF3535||SNF2-like, N-terminal domain superfamily||Helicase, C-terminal||Helicase superfamily 1/2, ATP-binding domain||Armadillo-like helical
novel_circ_0031590	5	65613726	65614219	-	493	249	ENSG00000113595;	exon:65613727-65613855,exon:65614098-65614219	TRIM23	P-loop containing nucleoside triphosphate hydrolase||RING-type zinc-finger, LisH dimerisation motif||Small GTPase superfamily, ARF/SAR type||B-box, C-terminal||Small GTP-binding protein domain||-||B-box-type zinc finger||Zinc finger, RING/FYVE/PHD-type||Zinc finger, RING-type, conserved site||Zinc finger C2H2-type||Zinc finger, RING-type
novel_circ_0001855	10	91942421	91956657	+	14236	275	ENSG00000095564;	exon:91942422-91942568,exon:91956528-91956657	BTAF1	SNF2-related, N-terminal domain||P-loop containing nucleoside triphosphate hydrolase||Armadillo-type fold||Domain of unknown function DUF3535||SNF2-like, N-terminal domain superfamily||Helicase, C-terminal||Helicase superfamily 1/2, ATP-binding domain||Armadillo-like helical
novel_circ_0001854	10	91939951	91953873	+	13922	250	ENSG00000095564;	exon:91939952-91940066,exon:91953737-91953873	BTAF1	SNF2-related, N-terminal domain||P-loop containing nucleoside triphosphate hydrolase||Armadillo-type fold||Domain of unknown function DUF3535||SNF2-like, N-terminal domain superfamily||Helicase, C-terminal||Helicase superfamily 1/2, ATP-binding domain||Armadillo-like helical
novel_circ_0001852	10	91849511	91855126	+	5615	299	ENSG00000107854;	exon:91849512-91849594,exon:91851216-91851336,exon:91855029-91855126	TNKS2	Ankyrin repeat-containing domain superfamily||Sterile alpha motif/pointed domain superfamily||Sterile alpha motif domain||Ankyrin repeat||Ankyrin repeat-containing domain||Poly(ADP-ribose) polymerase, catalytic domain
hsa_circ_0078465	6	158429735	158461729	+	31994	645	ENSG00000130338;	exon:158429736-158429897,exon:158461563-158461729	TULP4	WD40/YVTN repeat-like-containing domain superfamily||Tumour necrosis factor-like domain superfamily||WD40-repeat-containing domain superfamily||SOCS box domain||-||Tubby-like, C-terminal||Tubby, C-terminal||WD40 repeat||WD40-repeat-containing domain
hsa_circ_0030130	13	42159265	42160136	+	871	233	ENSG00000102780;	exon:42159266-42159372,exon:42160011-42160136	DGKH	NAD kinase/diacylglycerol kinase-like domain superfamily||Pleckstrin homology domain||Sterile alpha motif/pointed domain superfamily||Diacylglycerol kinase, catalytic domain||Inorganic polyphosphate/ATP-NAD kinase, N-terminal||Diacylglycerol kinase||Sterile alpha motif domain||PH-like domain superfamily||Protein kinase C-like, phorbol ester/diacylglycerol-binding domain||-||Diacylglycerol kinase,…
hsa_circ_0030131	13	42165330	42168818	+	3488	512	ENSG00000102780;	exon:42165331-42165433,exon:42166515-42166674	DGKH	NAD kinase/diacylglycerol kinase-like domain superfamily||Pleckstrin homology domain||Sterile alpha motif/pointed domain superfamily||Diacylglycerol kinase, catalytic domain||Inorganic polyphosphate/ATP-NAD kinase, N-terminal||Diacylglycerol kinase||Sterile alpha motif domain||PH-like domain superfamily||Protein kinase C-like, phorbol ester/diacylglycerol-binding domain||-||Diacylglycerol kinase,…
hsa_circ_0030135	13	42194884	42210765	+	15881	979	ENSG00000102780;	exon:42194885-42195016,exon:42198478-42198595	DGKH	NAD kinase/diacylglycerol kinase-like domain superfamily||Pleckstrin homology domain||Sterile alpha motif/pointed domain superfamily||Diacylglycerol kinase, catalytic domain||Inorganic polyphosphate/ATP-NAD kinase, N-terminal||Diacylglycerol kinase||Sterile alpha motif domain||PH-like domain superfamily||Protein kinase C-like, phorbol ester/diacylglycerol-binding domain||-||Diacylglycerol kinase,…
hsa_circ_0030136	13	42198477	42206146	+	7669	434	ENSG00000102780;	exon:42198478-42198595,exon:42199566-42199676,exon:42199813-42199909,exon:42206039-42206146	DGKH	NAD kinase/diacylglycerol kinase-like domain superfamily||Pleckstrin homology domain||Sterile alpha motif/pointed domain superfamily||Diacylglycerol kinase, catalytic domain||Inorganic polyphosphate/ATP-NAD kinase, N-terminal||Diacylglycerol kinase||Sterile alpha motif domain||PH-like domain superfamily||Protein kinase C-like, phorbol ester/diacylglycerol-binding domain||-||Diacylglycerol kinase,…
novel_circ_0031597	5	65777426	65785910	+	8484	504	ENSG00000123213;	exon:65777427-65777534,exon:65780179-65780281,exon:65781261-65781421,exon:65785775-65785910	NLN	-||Neurolysin/Thimet oligopeptidase, domain 2||Metallopeptidase, catalytic domain superfamily||Peptidase M3A/M3B catalytic domain||Neurolysin/Thimet oligopeptidase, N-terminal
novel_circ_0039465	9	91264916	91356155	-	91239	295	ENSG00000148090;	intron:91264917-91265058,intron:91355883-91355970,intron:91356088-91356155	AUH	Enoyl-CoA hydratase, C-terminal||ClpP/crotonase-like domain superfamily||Enoyl-CoA hydratase/isomerase, conserved site||Enoyl-CoA hydratase/isomerase
novel_circ_0039460	9	89393561	89403016	-	9455	398	ENSG00000187764;	exon:89393562-89393655,exon:89396737-89396835,exon:89399276-89399338,exon:89402871-89403016	SEMA4D	PSI domain||-||Immunoglobulin||Sema domain superfamily||Immunoglobulin-like fold||Semaphorin||Sema domain||Immunoglobulin subtype||Immunoglobulin-like domain superfamily||Plexin repeat||Immunoglobulin-like domain||WD40/YVTN repeat-like-containing domain superfamily||Immunoglobulin subtype 2
novel_circ_0039468	9	91325317	91327703	-	2386	289	ENSG00000148090;	intron:91325318-91325404,intron:91327500-91327703	AUH	Enoyl-CoA hydratase, C-terminal||ClpP/crotonase-like domain superfamily||Enoyl-CoA hydratase/isomerase, conserved site||Enoyl-CoA hydratase/isomerase
hsa_circ_0010778	1	21889980	21890694	-	714	330	ENSG00000142798;	exon:21889981-21890141,exon:21890427-21890485,exon:21890585-21890694	HSPG2	-||SEA domain||LDL receptor-like superfamily||Immunoglobulin V-set domain||EGF-like domain||Immunoglobulin subtype 2||Concanavalin A-like lectin/glucanase domain superfamily||Immunoglobulin-like domain superfamily||Immunoglobulin-like domain||Immunoglobulin-like fold||Laminin EGF domain||Laminin IV||EGF-like calcium-binding domain||Laminin G domain||EGF-like, conserved site||Immunoglobulin subtyp…
hsa_circ_0060872	20	51607526	51613832	-	6306	388	ENSG00000054793;	exon:51607527-51607584	ATP9A	P-type ATPase, transmembrane domain superfamily||P-type ATPase, C-terminal||P-type ATPase||P-type ATPase, subfamily IV||P-type ATPase, A domain superfamily||P-type ATPase, N-terminal||Probable phospholipid-transporting ATPase IIA||HAD superfamily||P-type ATPase, cytoplasmic domain N||P-type ATPase, phosphorylation site||HAD-like superfamily
novel_circ_0038331	9	125018798	125026910	-	8112	346	ENSG00000173611;	exon:125018799-125018951,exon:125020673-125020769,exon:125026812-125026910	SCAI	-||Protein SCAI||Protein SCAI, metazoan/viridiplantae
hsa_circ_0060874	20	51608517	51613832	-	5315	330	ENSG00000054793;	exon:51608518-51608626,exon:51613677-51613832	ATP9A	P-type ATPase, transmembrane domain superfamily||P-type ATPase, C-terminal||P-type ATPase||P-type ATPase, subfamily IV||P-type ATPase, A domain superfamily||P-type ATPase, N-terminal||Probable phospholipid-transporting ATPase IIA||HAD superfamily||P-type ATPase, cytoplasmic domain N||P-type ATPase, phosphorylation site||HAD-like superfamily
novel_circ_0038337	9	125220538	125228059	+	7521	310	ENSG00000136933;	exon:125220539-125220700,exon:125227910-125228059	RABEPK	Kelch-type beta propeller||Kelch repeat type 1||Kelch repeat type 2
novel_circ_0038334	9	125200779	125207721	+	6942	341	ENSG00000136933;	exon:125200780-125200906,exon:125203008-125203066,exon:125207564-125207721	RABEPK	Kelch-type beta propeller||Kelch repeat type 1||Kelch repeat type 2
novel_circ_0038335	9	125206789	125207721	+	932	157	ENSG00000136933;	intron:125207564-125207721	RABEPK	Kelch-type beta propeller||Kelch repeat type 1||Kelch repeat type 2
novel_circ_0012034	17	29451454	29482288	+	30834	429	ENSG00000160551;	exon:29451455-29451680,exon:29480368-29480481,exon:29482197-29482288	TAOK1	Protein kinase, ATP binding site||Protein kinase domain||Protein kinase-like domain superfamily||Serine/threonine-protein kinase, active site
novel_circ_0000069	10	101990550	102006633	-	16083	222	ENSG00000120029;	exon:101990551-101990611,exon:101991969-101992038,exon:102006540-102006633	ARMH3	Domain of unknown function DUF1741||Armadillo-type fold||Armadillo-like helical domain-containing protein 3-like
novel_circ_0011333	16	69150536	69154457	+	3921	374	ENSG00000141076;	exon:69150537-69150708,exon:69150813-69150904,exon:69153632-69153680,exon:69154393-69154457	UTP4	WD40/YVTN repeat-like-containing domain superfamily||Anaphase-promoting complex subunit 4, WD40 domain||WD40 repeat||Quinoprotein alcohol dehydrogenase-like superfamily||WD40-repeat-containing domain superfamily||WD40-repeat-containing domain
novel_circ_0011331	16	69139824	69154457	+	14633	249	ENSG00000141076;	exon:69139825-69139914,exon:69153584-69153680,exon:69154393-69154457	UTP4	WD40/YVTN repeat-like-containing domain superfamily||Anaphase-promoting complex subunit 4, WD40 domain||WD40 repeat||Quinoprotein alcohol dehydrogenase-like superfamily||WD40-repeat-containing domain superfamily||WD40-repeat-containing domain
hsa_circ_0054871	2	61490641	61498913	-	8272	1432	ENSG00000082898;	exon:61490642-61490776,exon:61498673-61498792,exon:61498865-61498913	XPO1	Exportin-1, repeat 2||Armadillo-like helical||Importin-beta, N-terminal domain||Exportin-1/Importin-beta-like||Chromosome region maintenance repeat||Exportin-1, repeat 3||-||Armadillo-type fold||Exportin-1, C-terminal
hsa_circ_0054877	2	61492034	61497007	-	4973	1128	ENSG00000082898;	exon:61492035-61492198,exon:61495455-61495613,exon:61496879-61497007	XPO1	Exportin-1, repeat 2||Armadillo-like helical||Importin-beta, N-terminal domain||Exportin-1/Importin-beta-like||Chromosome region maintenance repeat||Exportin-1, repeat 3||-||Armadillo-type fold||Exportin-1, C-terminal
hsa_circ_0054876	2	61492034	61495613	-	3579	999	ENSG00000082898;	exon:61492035-61492198	XPO1	Exportin-1, repeat 2||Armadillo-like helical||Importin-beta, N-terminal domain||Exportin-1/Importin-beta-like||Chromosome region maintenance repeat||Exportin-1, repeat 3||-||Armadillo-type fold||Exportin-1, C-terminal
hsa_circ_0055471	2	86080815	86083168	-	2353	356	ENSG00000068654;	exon:86080816-86080978,exon:86081601-86081706,exon:86083082-86083168	POLR1A	RNA polymerase, N-terminal||DNA-directed RNA pol I, largest subunit||RNA polymerase Rpb1, funnel domain superfamily||RNA polymerase Rpb1, domain 4||RNA polymerase Rpb1, domain 5||-||RNA polymerase Rpb1, domain 1||RNA polymerase Rpb1, domain 3||RNA polymerase Rpb1, domain 3 superfamily||RNA polymerase, alpha subunit
novel_circ_0037749	8	94393742	94407720	-	13978	139	ENSG00000197275;ENSG00000265817;	exon:94393743-94393882	RAD54B;FSBP	-
hsa_circ_0066119	3	52760794	52763624	-	2830	297	ENSG00000114904;	exon:52760795-52760936,exon:52763470-52763624	NEK4	Protein kinase, ATP binding site||Serine/threonine-protein kinase, active site||Protein kinase domain||-||Protein kinase-like domain superfamily
hsa_circ_0066115	3	52743351	52766375	-	23024	1644	ENSG00000114904;	exon:52743352-52743461,exon:52744239-52744305,exon:52766178-52766375	NEK4	Protein kinase, ATP binding site||Serine/threonine-protein kinase, active site||Protein kinase domain||-||Protein kinase-like domain superfamily
novel_circ_0014510	19	12679456	12679922	-	466	182	ENSG00000285589;ENSG00000095059;	exon:12679457-12679543,exon:12679623-12679719	AC010422.8;DHPS	-
hsa_circ_0059774	20	32215268	32216721	+	1453	296	ENSG00000101346;	exon:32215269-32215451,exon:32216609-32216721	POFUT1	GDP-fucose protein O-fucosyltransferase||GDP-fucose protein O-fucosyltransferase 1
hsa_circ_0066110	3	52739428	52741499	-	2071	295	ENSG00000114904;	exon:52739429-52739634,exon:52741411-52741499	NEK4	Protein kinase, ATP binding site||Serine/threonine-protein kinase, active site||Protein kinase domain||-||Protein kinase-like domain superfamily
hsa_circ_0066113	3	52743351	52752336	-	8985	1041	ENSG00000114904;	exon:52743352-52743461	NEK4	Protein kinase, ATP binding site||Serine/threonine-protein kinase, active site||Protein kinase domain||-||Protein kinase-like domain superfamily
novel_circ_0014512	19	1270866	1272051	+	1185	320	ENSG00000099622;	exon:1270867-1271036,exon:1271551-1271632,exon:1271981-1272051	CIRBP	-||RNA recognition motif domain, eukaryote||RBM3/CIRBP, RNA recognition motif||RNA recognition motif domain||Nucleotide-binding alpha-beta plait domain superfamily||RNA-binding domain superfamily
novel_circ_0037744	8	93786222	93816515	+	30293	266	ENSG00000164953;	exon:93786223-93786346,exon:93816372-93816515	TMEM67	Meckelin||Growth factor receptor cysteine-rich domain superfamily||-
hsa_circ_0067244	3	128884652	128904505	+	19853	999	ENSG00000177646;	exon:128904386-128904505	ACAD9	Acyl-CoA dehydrogenase/oxidase, N-terminal and middle domain superfamily||Acyl-CoA dehydrogenase/oxidase, N-terminal domain superfamily||Acyl-CoA dehydrogenase/oxidase, N-terminal||Acyl-CoA oxidase/dehydrogenase, central domain||Acyl-CoA dehydrogenase, conserved site||Acyl-CoA dehydrogenase-like, C-terminal||-||Acyl-CoA dehydrogenase/oxidase C-terminal
novel_circ_0037745	8	93786222	93822563	+	36341	508	n/a	intergenic_region:93786223-93786346,intergenic_region:93787844-93787949,intergenic_region:93791263-93791319,intergenic_region:93820119-93820230,intergenic_region:93822450-93822563	--	-
hsa_circ_0020094	10	115120184	115165645	+	45457	799	ENSG00000107518;	exon:115120185-115120268,exon:115165558-115165645	ATRNL1	Attractin-like, C-type lectin-like domain||EGF-like domain||Spermadhesin, CUB domain superfamily||EGF-like, conserved site||Plexin repeat||EGF-like domain, extracellular||C-type lectin-like/link domain superfamily||-||CUB domain||Kelch-type beta propeller||Laminin EGF domain||C-type lectin fold||C-type lectin-like||PSI domain
hsa_circ_0020093	10	115120184	115129535	+	9349	536	ENSG00000107518;	exon:115120185-115120268,exon:115121699-115121812,exon:115127593-115127721,exon:115129327-115129535	ATRNL1	Attractin-like, C-type lectin-like domain||EGF-like domain||Spermadhesin, CUB domain superfamily||EGF-like, conserved site||Plexin repeat||EGF-like domain, extracellular||C-type lectin-like/link domain superfamily||-||CUB domain||Kelch-type beta propeller||Laminin EGF domain||C-type lectin fold||C-type lectin-like||PSI domain
novel_circ_0000932	10	31820386	31854206	-	33820	402	ENSG00000165322;	exon:31820387-31820488,exon:31826304-31826385,exon:31852517-31852597,exon:31854066-31854206	ARHGAP12	SH3 domain||Rho GTPase-activating protein domain||PH-like domain superfamily||WW domain superfamily||Pleckstrin homology domain||SH3-like domain superfamily||ARHGAP12, SH3 domain||Rho GTPase activation protein||WW domain
novel_circ_0000930	10	31817787	31831800	-	14013	341	ENSG00000165322;	exon:31817788-31817886,exon:31820387-31820488,exon:31826304-31826385,exon:31831739-31831800	ARHGAP12	SH3 domain||Rho GTPase-activating protein domain||PH-like domain superfamily||WW domain superfamily||Pleckstrin homology domain||SH3-like domain superfamily||ARHGAP12, SH3 domain||Rho GTPase activation protein||WW domain
novel_circ_0000936	10	31843460	31854206	-	10746	345	ENSG00000165322;	exon:31843461-31843586,exon:31852517-31852597,exon:31854066-31854206	ARHGAP12	SH3 domain||Rho GTPase-activating protein domain||PH-like domain superfamily||WW domain superfamily||Pleckstrin homology domain||SH3-like domain superfamily||ARHGAP12, SH3 domain||Rho GTPase activation protein||WW domain
novel_circ_0000935	10	31839636	31854206	-	14570	140	ENSG00000165322;	exon:31854066-31854206	ARHGAP12	SH3 domain||Rho GTPase-activating protein domain||PH-like domain superfamily||WW domain superfamily||Pleckstrin homology domain||SH3-like domain superfamily||ARHGAP12, SH3 domain||Rho GTPase activation protein||WW domain
hsa_circ_0053593	2	32439507	32453942	+	14435	1122	ENSG00000115760;	exon:32439508-32439686,exon:32448795-32448928,exon:32453808-32453942	BIRC6	BIR repeat||-||Ubiquitin-conjugating enzyme E2||Baculoviral IAP repeat-containing protein 6||Ubiquitin-conjugating enzyme/RWD-like
hsa_circ_0018315	10	48401611	48404981	+	3370	301	ENSG00000107643;	exon:48401612-48401782,exon:48404852-48404981	MAPK8	Mitogen-activated protein (MAP) kinase, JNK||Mitogen-activated protein (MAP) kinase, conserved site||Protein kinase-like domain superfamily||-||Protein kinase domain||Serine/threonine-protein kinase, active site
novel_circ_0001081	10	382646	390863	-	8217	237	ENSG00000151240;	exon:382647-382761,exon:390740-390863	DIP2C	Dip2-like domain||DMAP1-binding domain||AMP-dependent synthetase/ligase||AMP-dependent synthetase-like superfamily
novel_circ_0001082	10	408925	415888	-	6963	407	ENSG00000151240;	exon:408926-409017,exon:413913-414110,exon:415769-415888	DIP2C	Dip2-like domain||DMAP1-binding domain||AMP-dependent synthetase/ligase||AMP-dependent synthetase-like superfamily
novel_circ_0031230	5	34922216	34923234	+	1018	101	ENSG00000113460;	exon:34923133-34923234	BRIX1	Brix domain||Ribosome biogenesis protein BRX1
novel_circ_0031231	5	34933814	34941183	+	7369	216	ENSG00000168724;	exon:34933815-34933908,exon:34935710-34935833	DNAJC21	Chaperone J-domain superfamily||Matrin/U1-C-like, C2H2-type zinc finger||-||Zinc finger C2H2 superfamily||DnaJ domain||Zinc finger C2H2-type||Zinc finger, double-stranded RNA binding||DnaJ domain, conserved site
novel_circ_0031232	5	34953925	34954944	+	1019	466	ENSG00000168724;	exon:34953926-34954001,exon:34954553-34954944	DNAJC21	Chaperone J-domain superfamily||Matrin/U1-C-like, C2H2-type zinc finger||-||Zinc finger C2H2 superfamily||DnaJ domain||Zinc finger C2H2-type||Zinc finger, double-stranded RNA binding||DnaJ domain, conserved site
novel_circ_0031233	5	35084469	35089663	-	5194	413	ENSG00000113494;	exon:35084470-35084639,exon:35086208-35086340,exon:35089551-35089663	PRLR	Fibronectin type III superfamily||-||Prolactin receptor||Long hematopoietin receptor, single chain, conserved site||Fibronectin type III||Immunoglobulin-like fold||Growth hormone/erythropoietin receptor, ligand binding
novel_circ_0031234	5	35195102	35195713	-	611	304	ENSG00000113494;	exon:35195103-35195245,exon:35195551-35195713	PRLR	Fibronectin type III superfamily||-||Prolactin receptor||Long hematopoietin receptor, single chain, conserved site||Fibronectin type III||Immunoglobulin-like fold||Growth hormone/erythropoietin receptor, ligand binding
novel_circ_0031236	5	35739918	35759719	+	19801	416	ENSG00000152582;	exon:35739919-35740046,exon:35740129-35740267,exon:35759568-35759719	SPEF2	Zinc finger, TTF-type||P-loop containing nucleoside triphosphate hydrolase||CH-like domain in sperm protein||EF-hand domain pair||-||Ribonuclease H-like superfamily||CH domain superfamily||Calponin homology domain
[truncated: 25,834 more rows]
