# Supplementary figures and images for: Comprehensive profile and contrastive analysis of circular RNA expression in cervical squamous carcinoma and adenocarcinoma
Source: PeerJ journal article supplement (doi:10.7717/peerj.14759), 2023-01-26

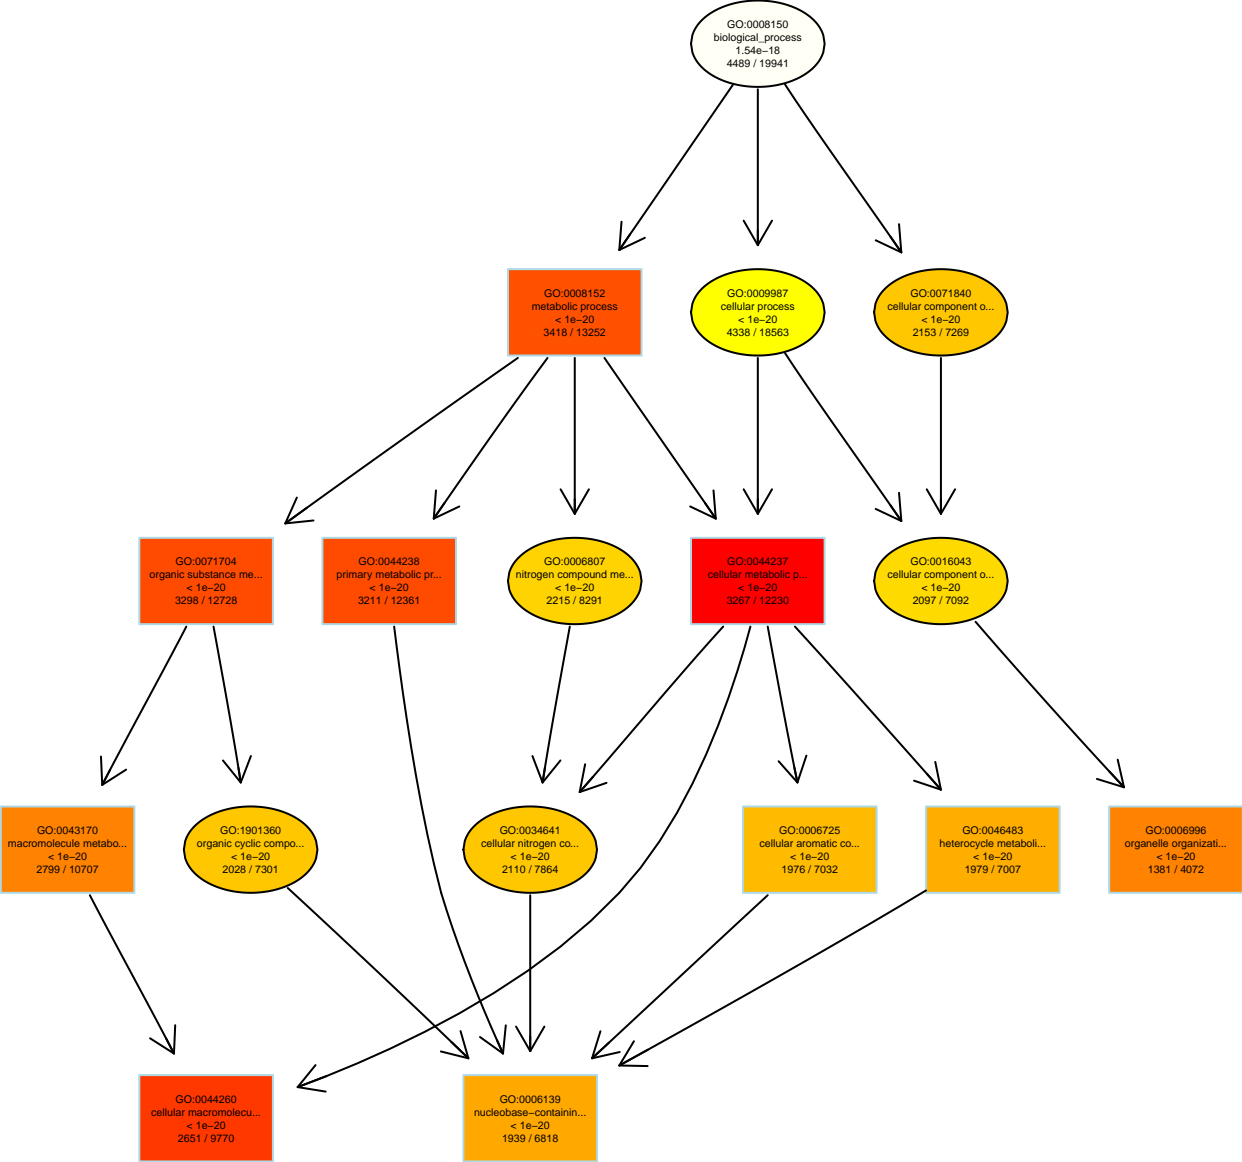

Supplement: Supp_tables_and_figs_77018.zip [file Supp_tables_and_figs_77018.zip]

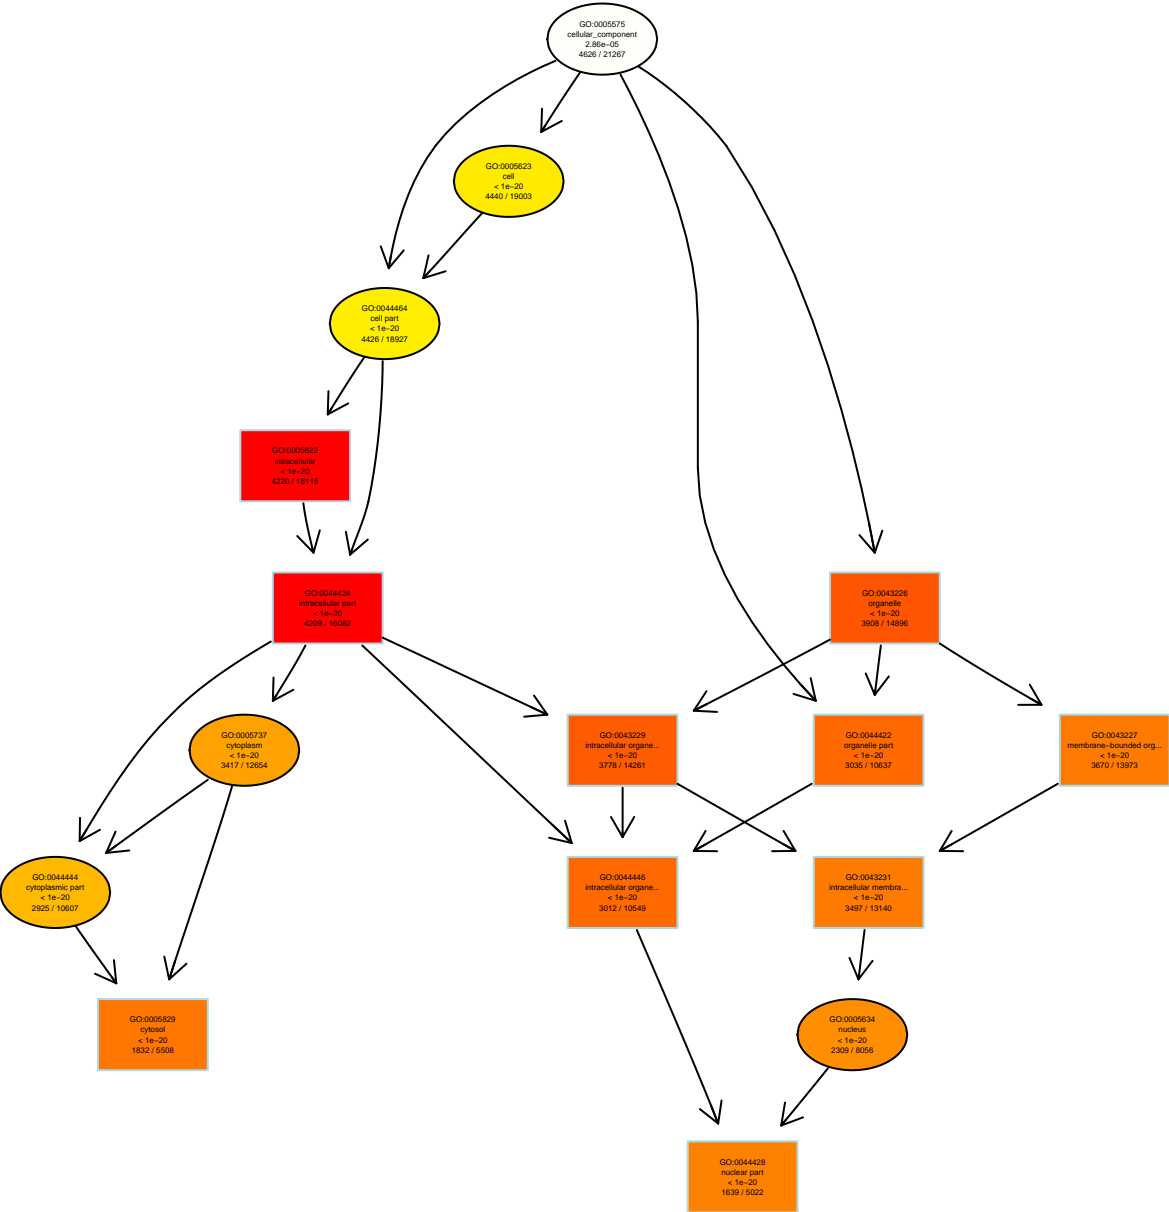

Supplement: Supp_tables_and_figs_77018.zip [file Supp_tables_and_figs_77018.zip]

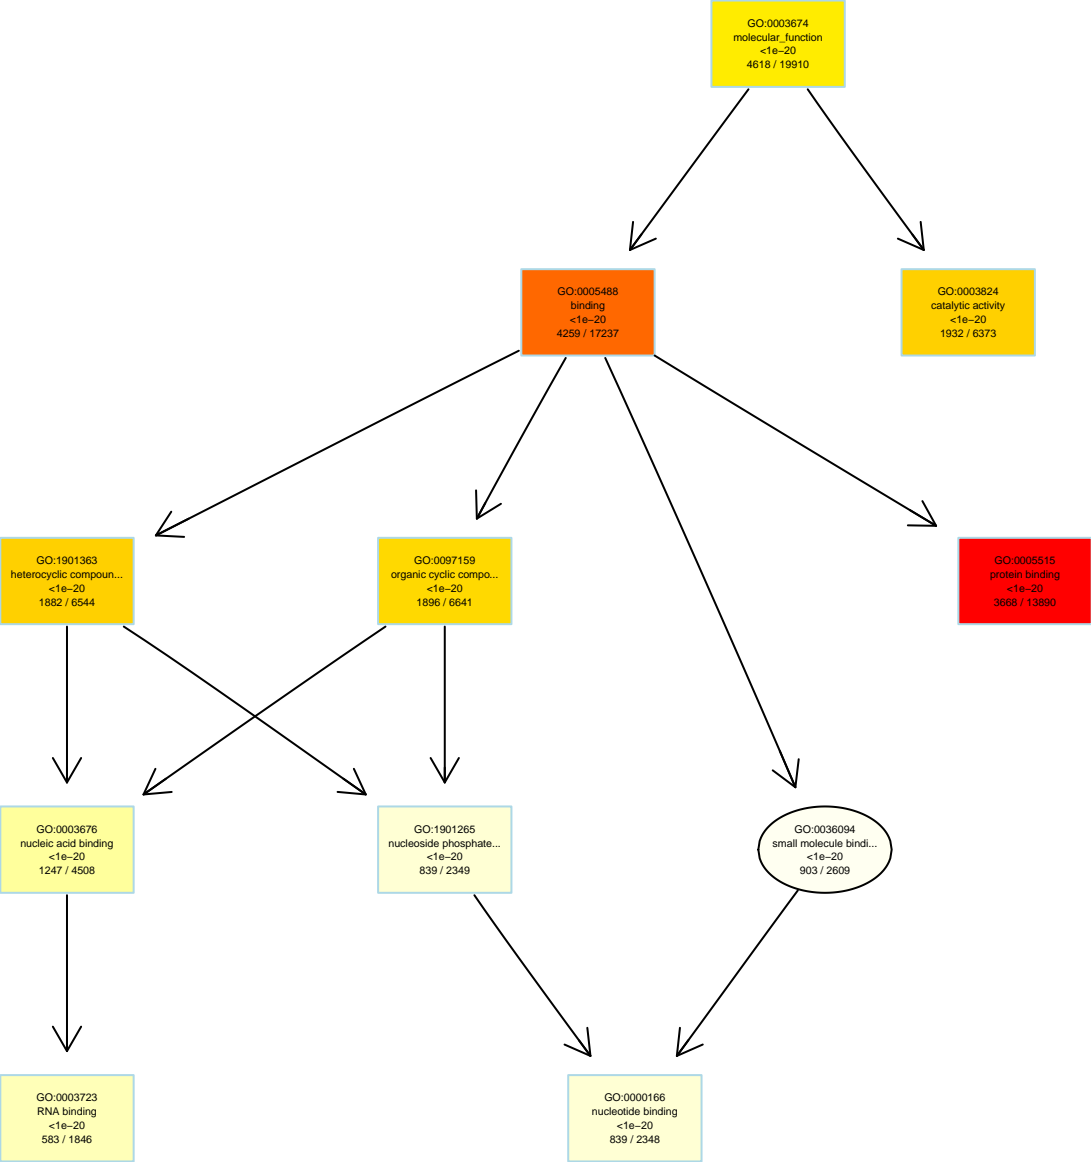

Supplement: Supp_tables_and_figs_77018.zip [file Supp_tables_and_figs_77018.zip]

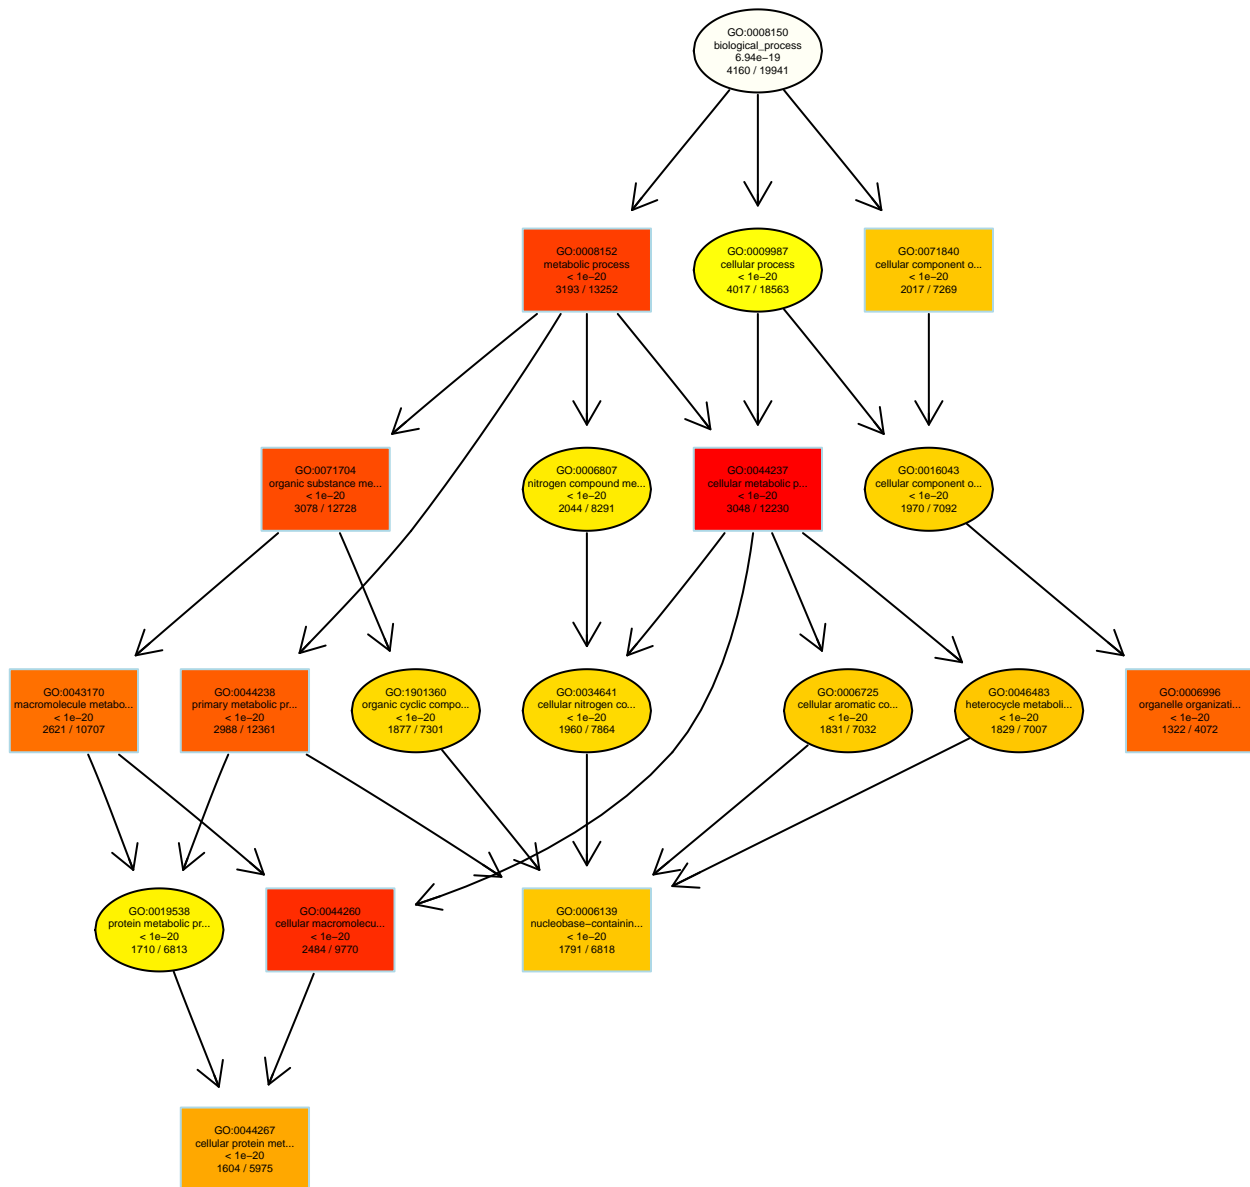

Supplement: Supp_tables_and_figs_77018.zip [file Supp_tables_and_figs_77018.zip]

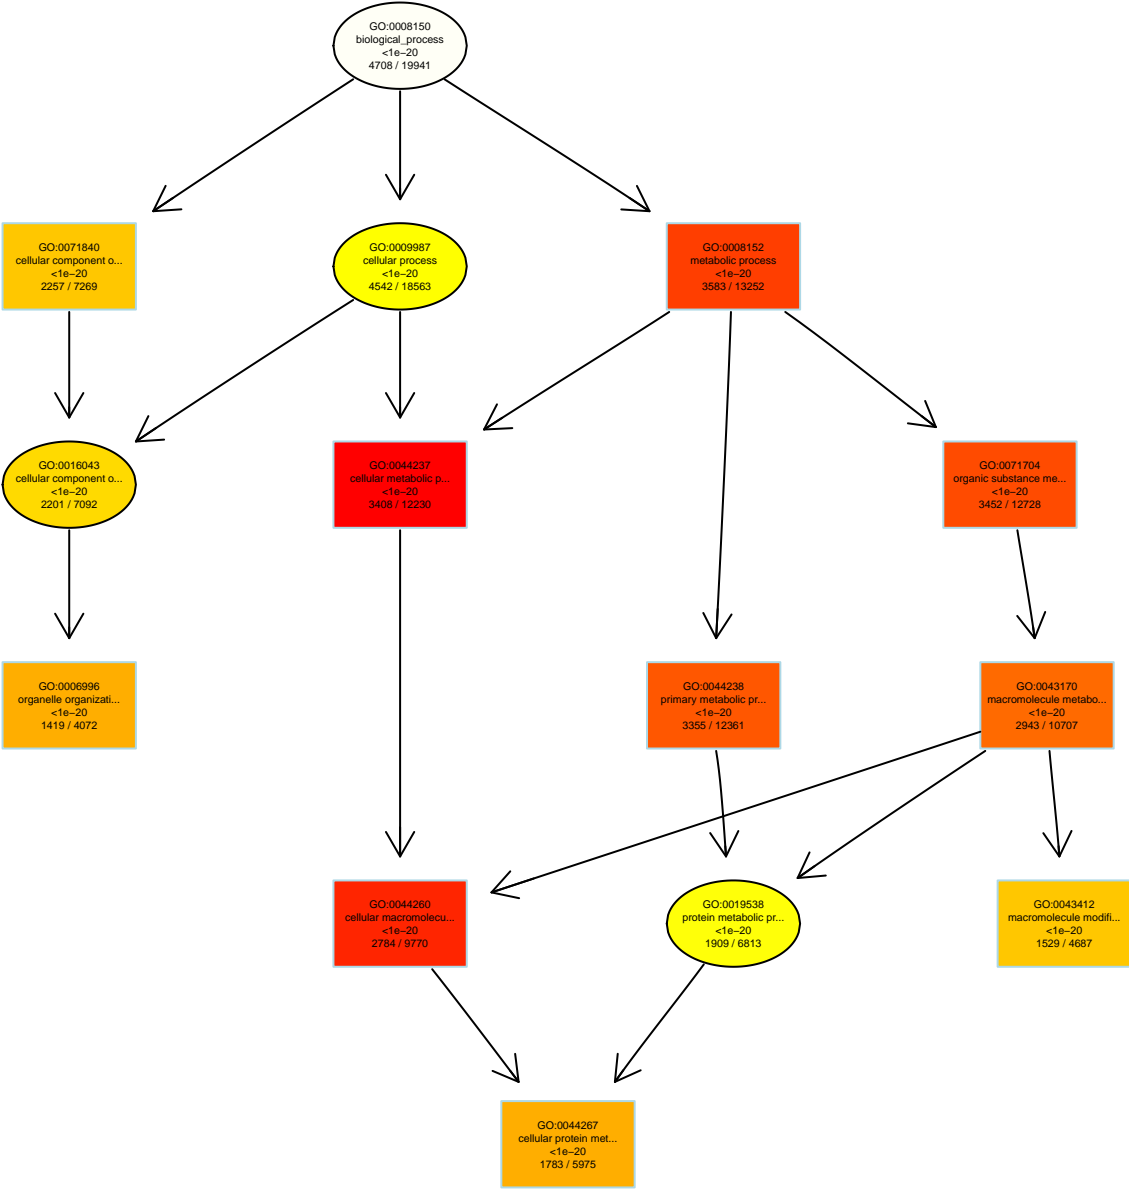

Supplement: Supp_tables_and_figs_77018.zip [file Supp_tables_and_figs_77018.zip]

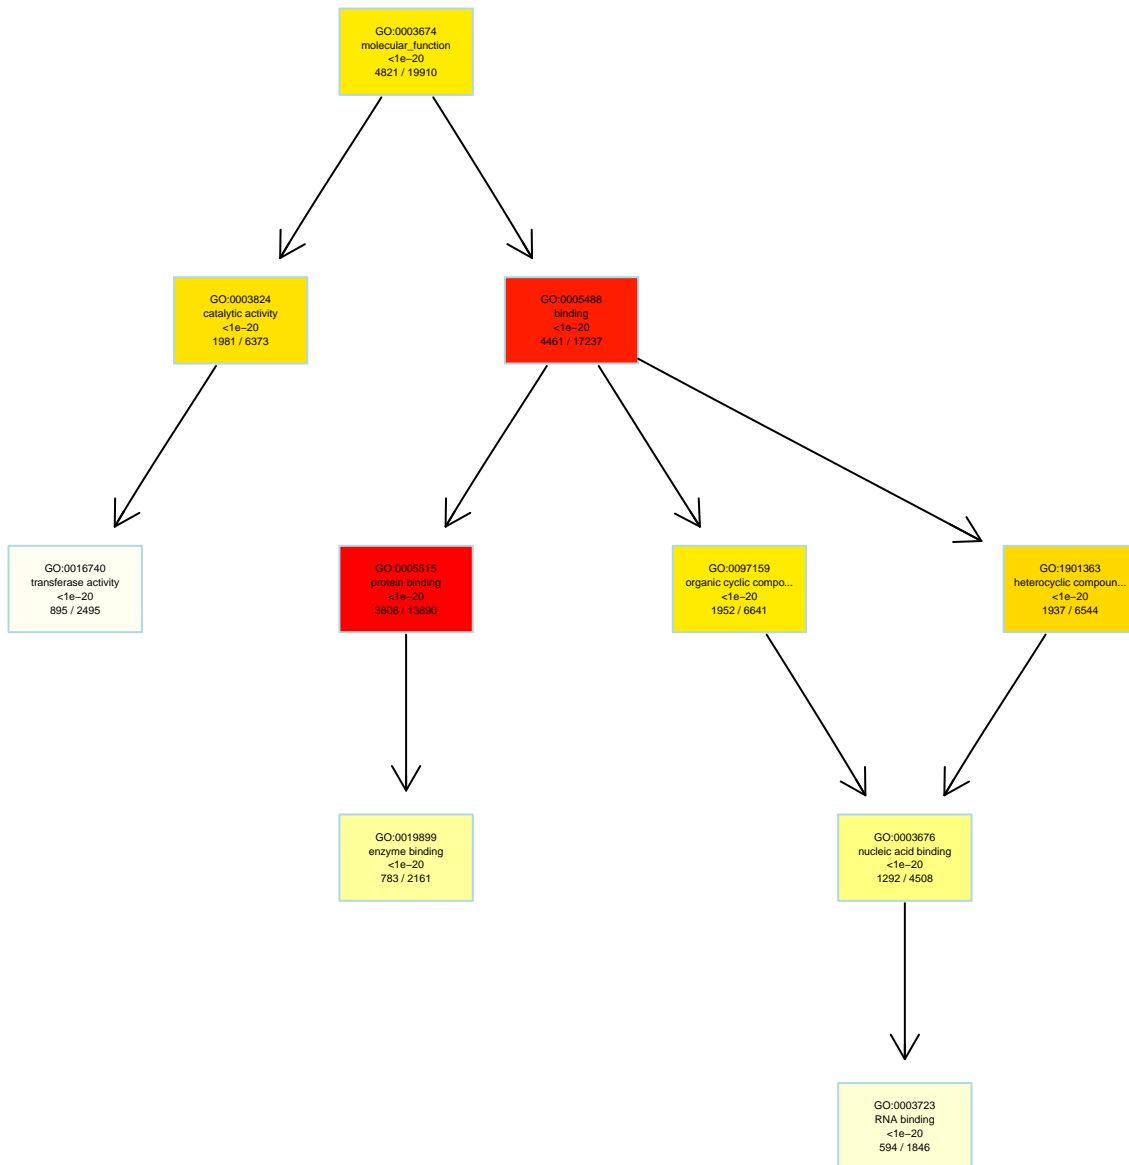

Supplement: Supp_tables_and_figs_77018.zip [file Supp_tables_and_figs_77018.zip]

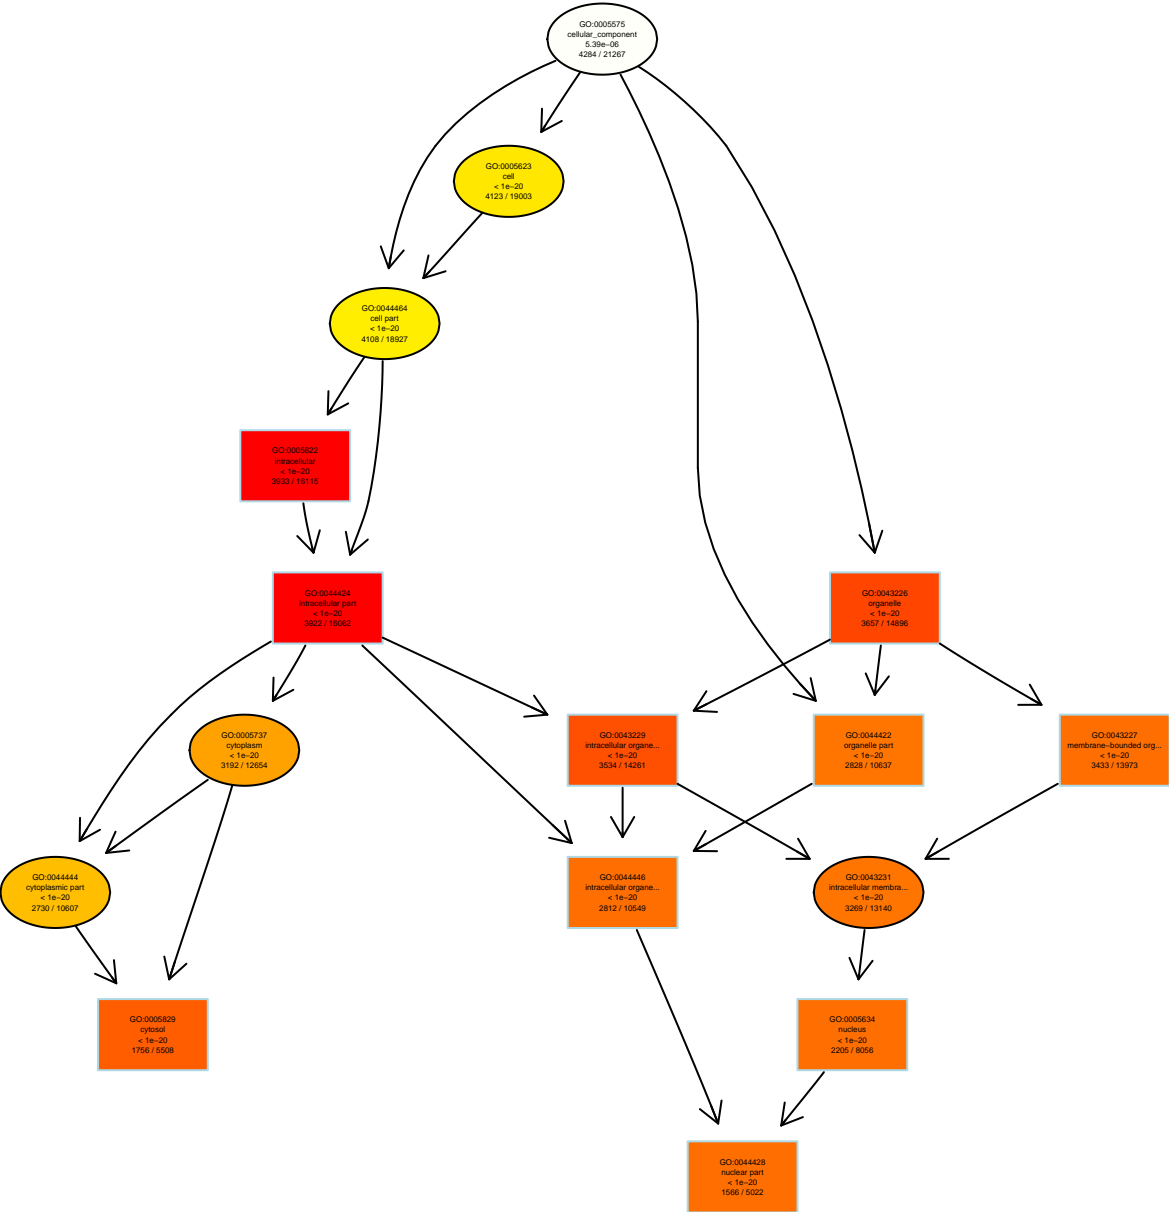

Supplement: Supp_tables_and_figs_77018.zip [file Supp_tables_and_figs_77018.zip]

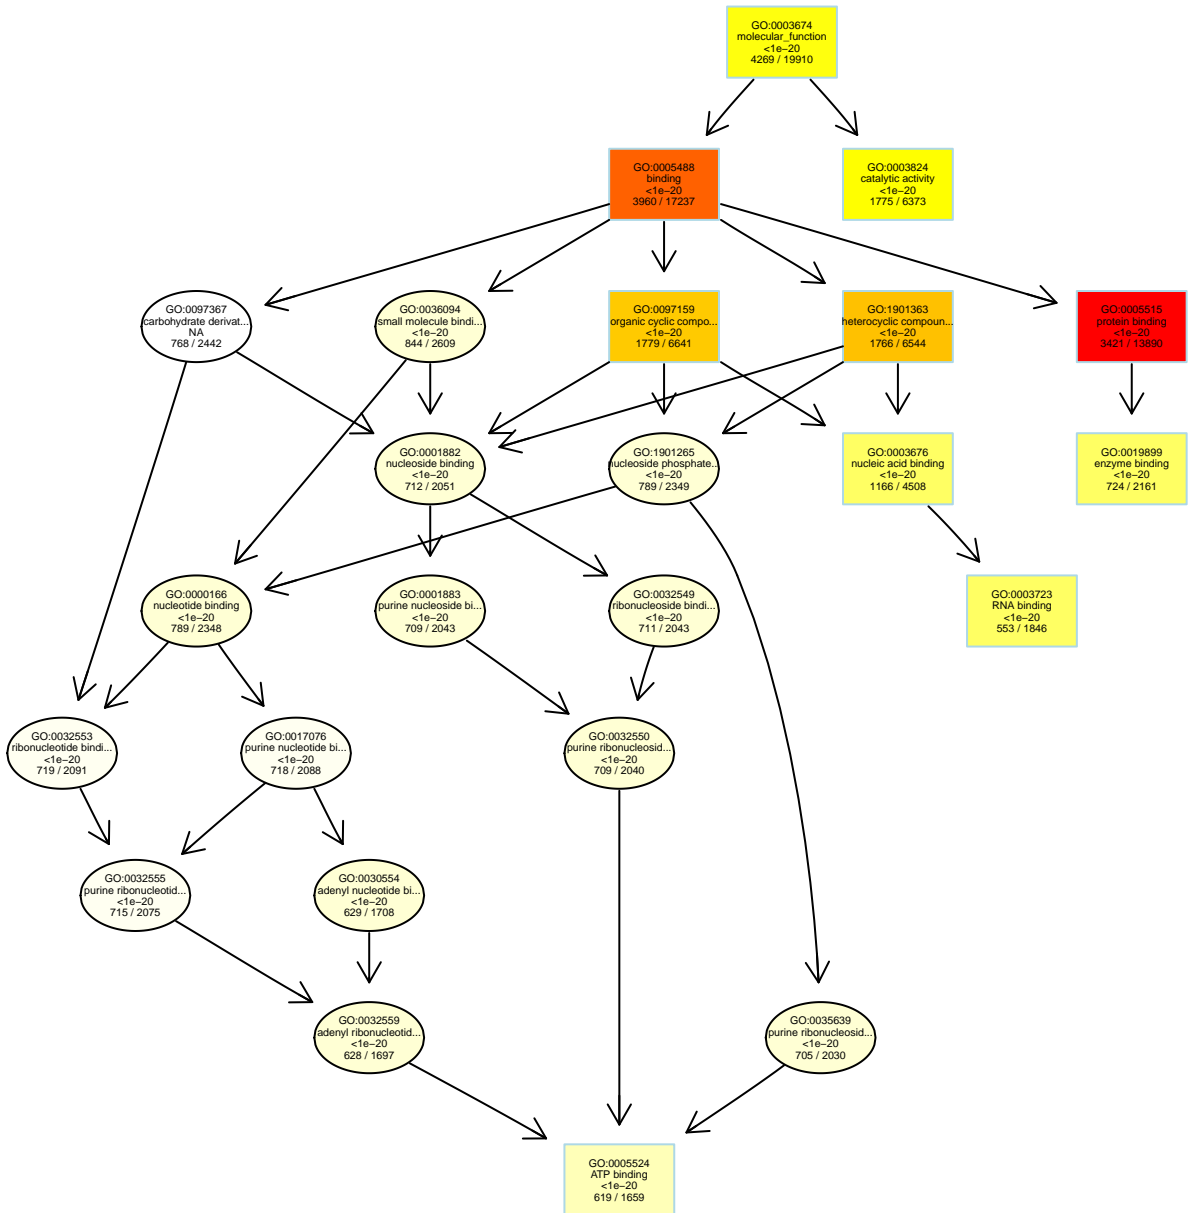

Supplement: Supp_tables_and_figs_77018.zip [file Supp_tables_and_figs_77018.zip]

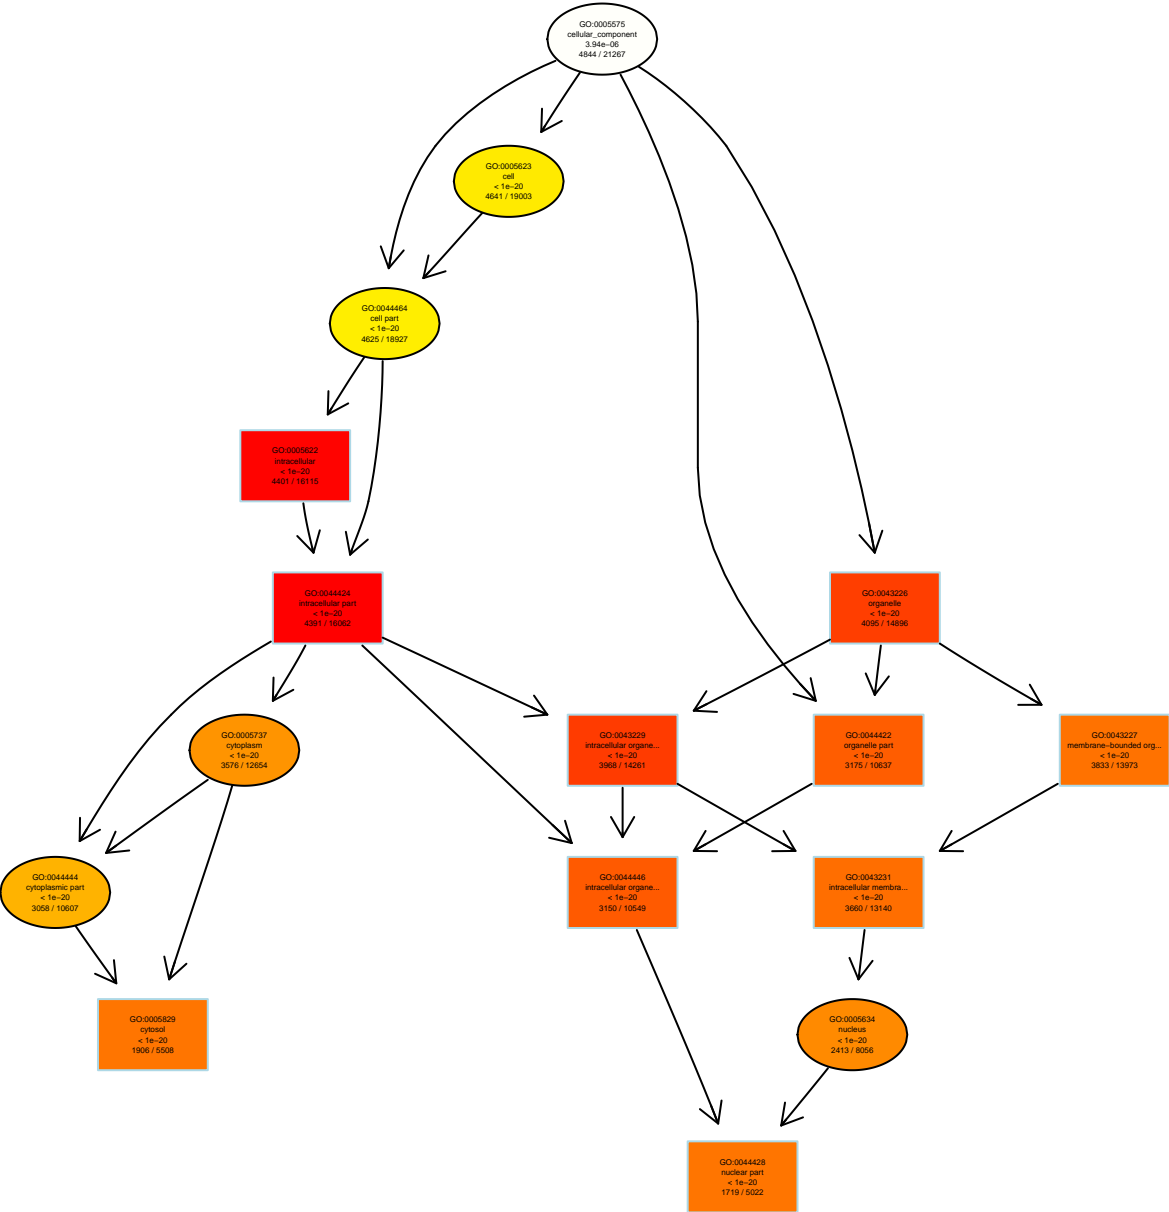

Supplement: Supp_tables_and_figs_77018.zip [file Supp_tables_and_figs_77018.zip]
